# Supplementary material for: Tryptophanyl-Transfer RNA Synthetase Is Involved in a Negative Feedback Loop Mitigating Interferon-γ-Induced Gene Expression
Source: MDPI journal article supplement (doi:10.3390/cells13020180), 2024-01-17
Supplement: s1 [file s1]

## Supplementary Figure S1

## Proteins upregulated (76) in A375 cells after 48h of IFN- $\gamma$

| ▼          | Biological Process (Gene Ontology)                              |                  |          |                        |   |
|------------|-----------------------------------------------------------------|------------------|----------|------------------------|---|
| GO-term    | description                                                     | count in network | strength | ▲ false discovery rate |   |
| GO:0002376 | Immune system process                                           | 47 of 2121       | 0.76     | 1.06e-22               | ● |
| GO:0019882 | Antigen processing and presentation                             | 18 of 93         | 1.71     | 4.18e-21               | ● |
| GO:0006955 | Immune response                                                 | 38 of 1321       | 0.88     | 5.91e-21               | ● |
| GO:0044419 | Biological process involved in interspecies interaction betw... | 38 of 1490       | 0.83     | 2.90e-19               |   |
| GO:0048002 | Antigen processing and presentation of peptide antigen          | 15 of 60         | 1.82     | 6.54e-19               | ● |
| GO:0051707 | Response to other organism                                      | 36 of 1328       | 0.85     | 6.54e-19               |   |
| GO:0006952 | Defense response                                                | 36 of 1394       | 0.83     | 2.01e-18               |   |
| GO:0098542 | Defense response to other organism                              | 30 of 989        | 0.9      | 2.01e-16               |   |
| GO:0045087 | Innate immune response                                          | 27 of 754        | 0.97     | 3.57e-16               |   |
| GO:0019883 | Antigen processing and presentation of endogenous antigen       | 11 of 25         | 2.06     | 7.91e-16               |   |
| GO:0002483 | Antigen processing and presentation of endogenous peptid...     | 10 of 18         | 2.16     | 4.84e-15               |   |
| GO:0019884 | Antigen processing and presentation of exogenous antigen        | 12 of 48         | 1.82     | 4.84e-15               |   |
| GO:0050776 | Regulation of immune response                                   | 27 of 844        | 0.92     | 4.84e-15               |   |
| GO:0002478 | Antigen processing and presentation of exogenous peptide ...    | 11 of 39         | 1.87     | 3.54e-14               |   |
| GO:0002682 | Regulation of immune system process                             | 32 of 1438       | 0.77     | 3.54e-14               |   |
| GO:0009605 | Response to external stimulus                                   | 39 of 2355       | 0.64     | 4.38e-14               |   |
| GO:0002831 | Regulation of response to biotic stimulus                       | 19 of 361        | 1.14     | 1.39e-13               |   |
| GO:0019885 | Antigen processing and presentation of endogenous peptid...     | 8 of 12          | 2.24     | 2.78e-12               |   |
| GO:0002474 | Antigen processing and presentation of peptide antigen via ...  | 9 of 28          | 1.93     | 8.44e-12               |   |
| GO:0034097 | Response to cytokine                                            | 23 of 804        | 0.88     | 1.56e-11               |   |
| GO:0031347 | Regulation of defense response                                  | 21 of 638        | 0.94     | 1.85e-11               |   |
| GO:0045088 | Regulation of innate immune response                            | 15 of 238        | 1.22     | 2.00e-11               |   |
| GO:0034341 | Response to interferon-gamma                                    | 12 of 127        | 1.39     | 1.01e-10               | ● |

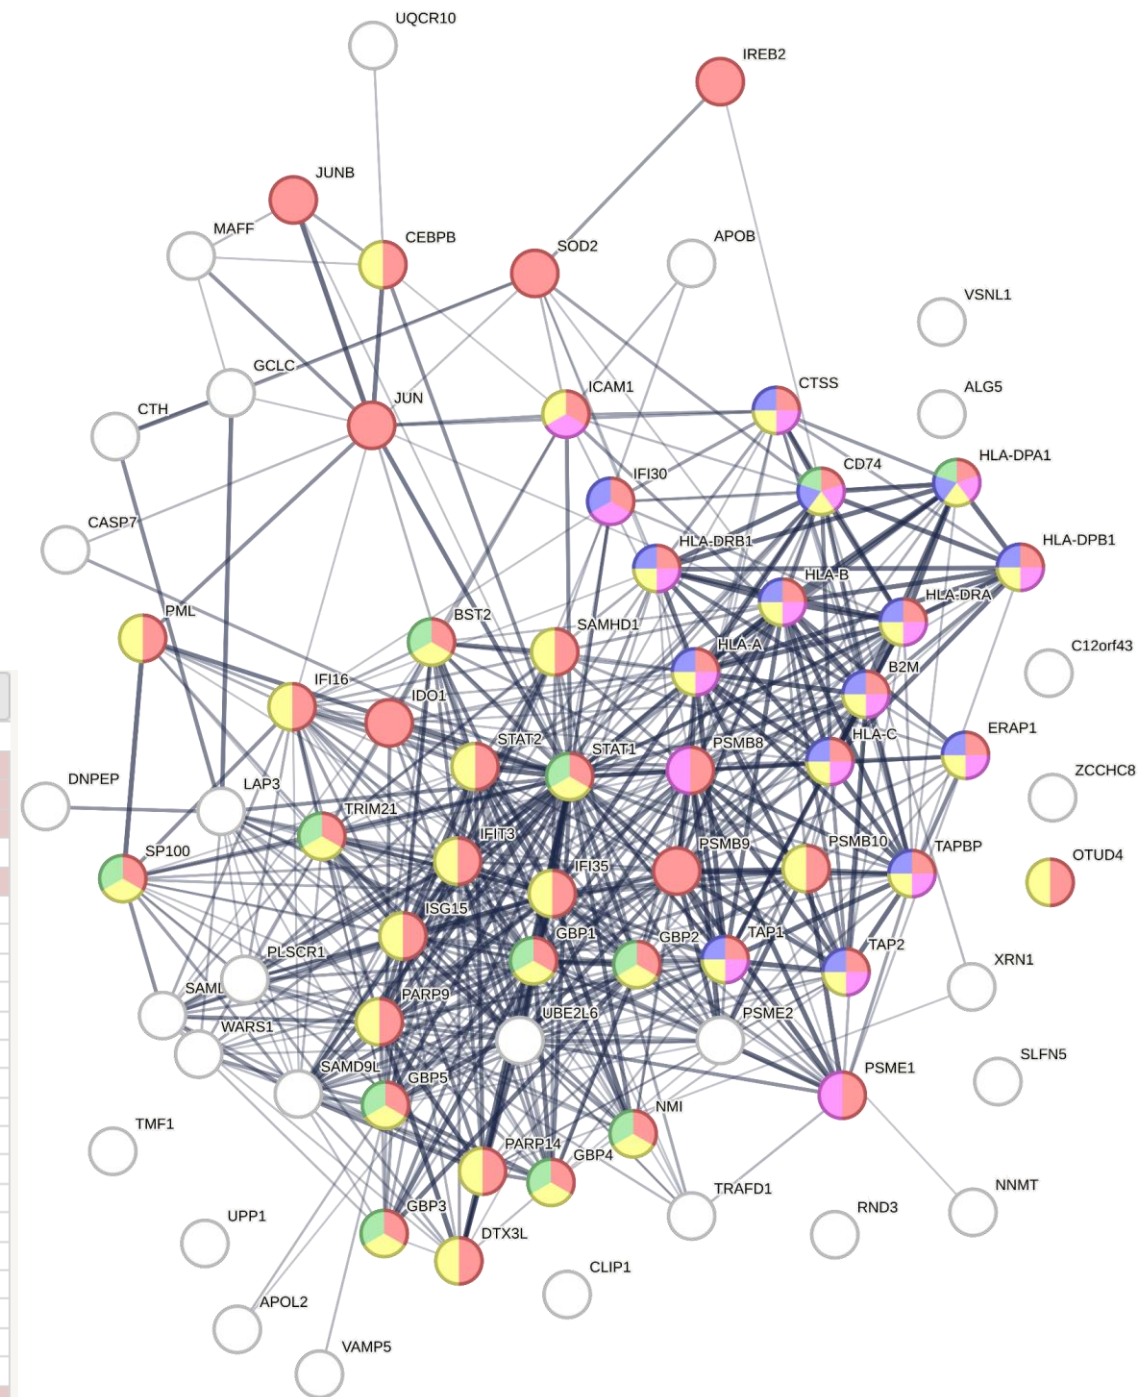

### Proteins downregulated (184) in A375 cells after 48h of IFN- $\gamma$

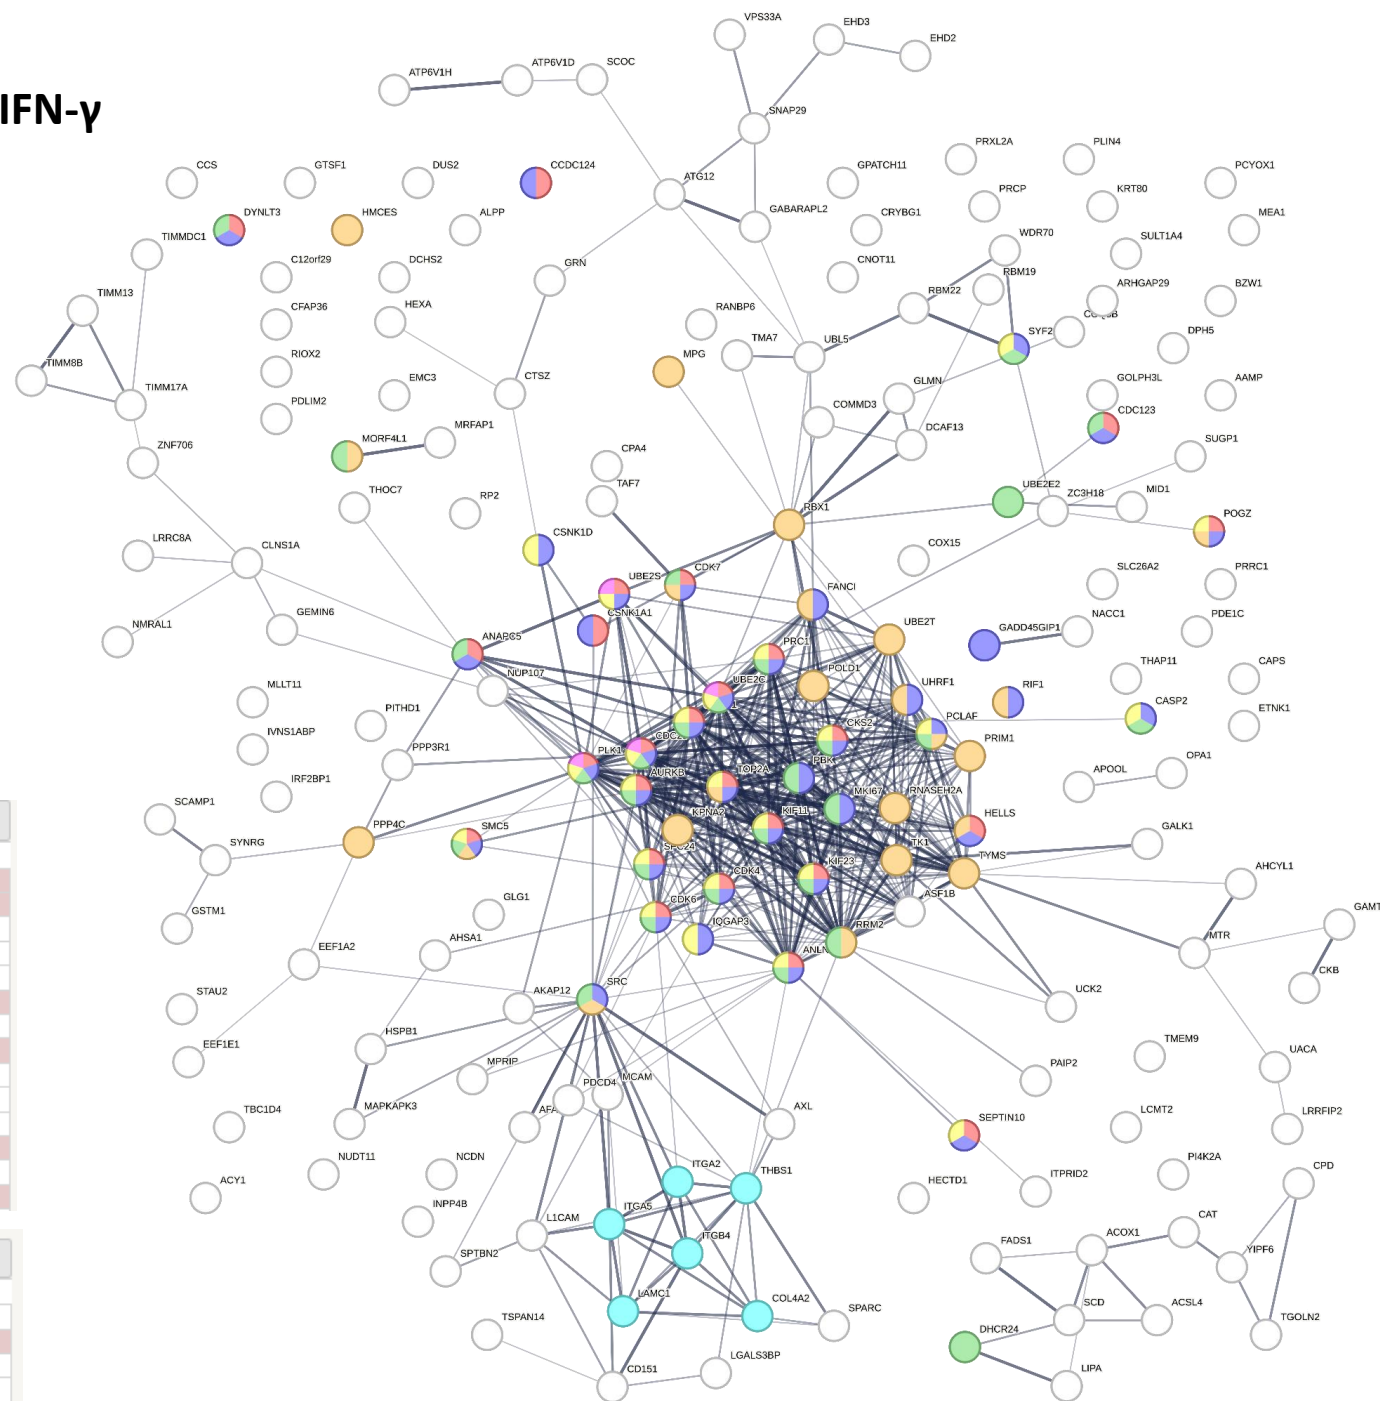

| GO-term    | description                                              | count in network | strength | false discovery rate |   |
|------------|----------------------------------------------------------|------------------|----------|----------------------|---|
| GO:0051301 | Cell division                                            | 25 of 527        | 0.69     | 1.60e-06             | 🔴 |
| GO:0007049 | Cell cycle                                               | 37 of 1246       | 0.49     | 8.46e-06             | 🟡 |
| GO:0044237 | Cellular metabolic process                               | 96 of 6568       | 0.18     | 0.0033               |   |
| GO:0007346 | Regulation of mitotic cell cycle                         | 18 of 493        | 0.58     | 0.0062               |   |
| GO:1903047 | Mitotic cell cycle process                               | 19 of 537        | 0.57     | 0.0062               |   |
| GO:0006259 | DNA metabolic process                                    | 23 of 785        | 0.48     | 0.0071               | 🟡 |
| GO:0000278 | Mitotic cell cycle                                       | 20 of 631        | 0.52     | 0.0077               |   |
| GO:0051726 | Regulation of cell cycle                                 | 28 of 1108       | 0.42     | 0.0077               | 🟢 |
| GO:0008152 | Metabolic process                                        | 108 of 7988      | 0.15     | 0.0077               |   |
| GO:0051983 | Regulation of chromosome segregation                     | 9 of 128         | 0.87     | 0.0094               |   |
| GO:1901990 | Regulation of mitotic cell cycle phase transition        | 14 of 332        | 0.64     | 0.0094               |   |
| GO:0022402 | Cell cycle process                                       | 23 of 835        | 0.46     | 0.0096               | 🟡 |
| GO:0071704 | Organic substance metabolic process                      | 102 of 7522      | 0.15     | 0.0103               |   |
| GO:1904668 | Positive regulation of ubiquitin protein ligase activity | 4 of 11          | 1.58     | 0.0111               | 🟡 |

| KEGG Pathways  |                                |                         |                 |                             |
|----------------|--------------------------------|-------------------------|-----------------|-----------------------------|
| <i>pathway</i> | <i>description</i>             | <i>count in network</i> | <i>strength</i> | <i>false discovery rate</i> |
| hsa04110       | Cell cycle                     | 8 of 120                | 0.84            | 0.0104                      |
| hsa04512       | ECM-receptor interaction       | 6 of 88                 | 0.85            | 0.0465                      |
| hsa05222       | Small cell lung cancer         | 6 of 92                 | 0.83            | 0.0465                      |
| hsa04120       | Ubiquitin mediated proteolysis | 7 of 134                | 0.74            | 0.0465                      |

Supplementary Figure S3

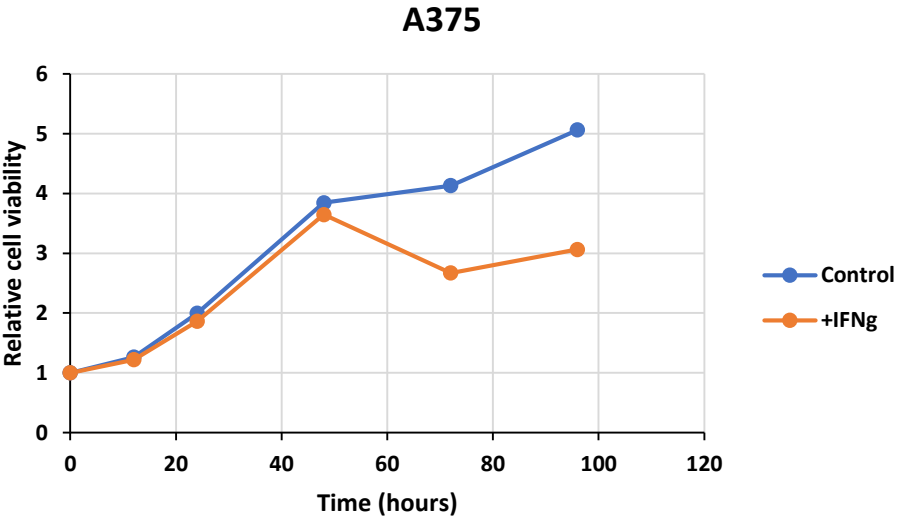

TCGA and Gtex data (Tumors and normal tissues)

Comparison of the expression profile of WARS and all the genes from TCGA and Gtex (cuff-off = Top 50 correlating genes)

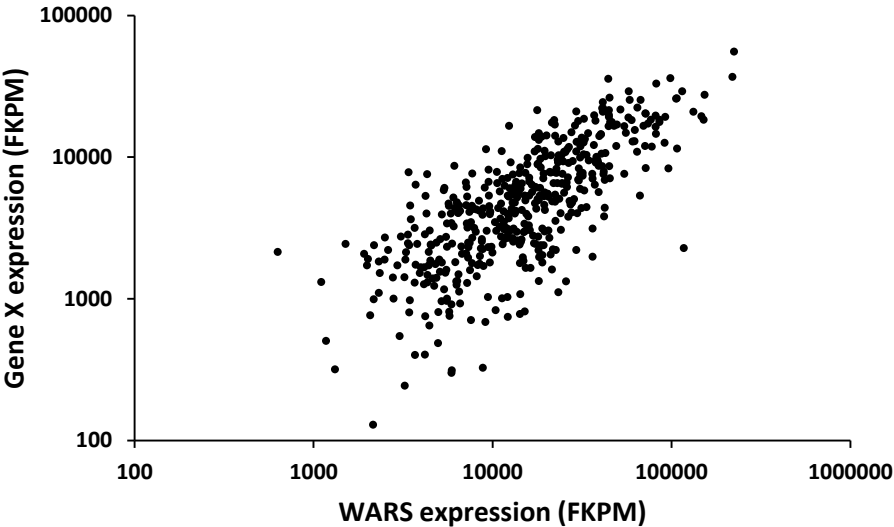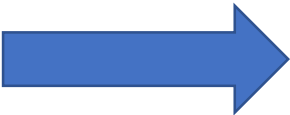

Top 50 correlating genes correlating with WARS

| Gene Symbol | Gene ID            | PCC  |
|-------------|--------------------|------|
| TAP1        | ENSG00000168394.10 | 0.65 |
| STAT1       | ENSG00000115415.18 | 0.59 |
| TAP2        | ENSG00000204267.13 | 0.58 |
| GBP5        | ENSG00000154451.14 | 0.58 |
| BATF2       | ENSG00000168062.9  | 0.56 |
| LAP3        | ENSG0000002549.12  | 0.53 |
| GBP1        | ENSG00000117228.9  | 0.51 |
| CXCL11      | ENSG00000169246.12 | 0.49 |
| GBP4        | ENSG00000162654.8  | 0.49 |
| GBP1P1      | ENSG00000225452.6  | 0.48 |
| PSMB9       | ENSG00000240065.7  | 0.48 |
| UBE2L6      | ENSG00000156587.15 | 0.48 |
| ETV7        | ENSG00000010030.13 | 0.47 |
| CXCL9       | ENSG00000138755.5  | 0.47 |
| CXCL10      | ENSG00000169245.5  | 0.46 |
| HLA-A       | ENSG00000206503.11 | 0.45 |
| LAG3        | ENSG00000089692.8  | 0.45 |
| EPSTI1      | ENSG00000133106.14 | 0.45 |
| APOL6       | ENSG00000221963.5  | 0.44 |
| PSMB8       | ENSG00000204264.8  | 0.44 |
| IL15BP      | ENSG00000137456.17 | 0.43 |
| IFI35       | ENSG00000068079.7  | 0.43 |
| TRIM21      | ENSG00000132109.9  | 0.43 |



Supplementary Figure S5

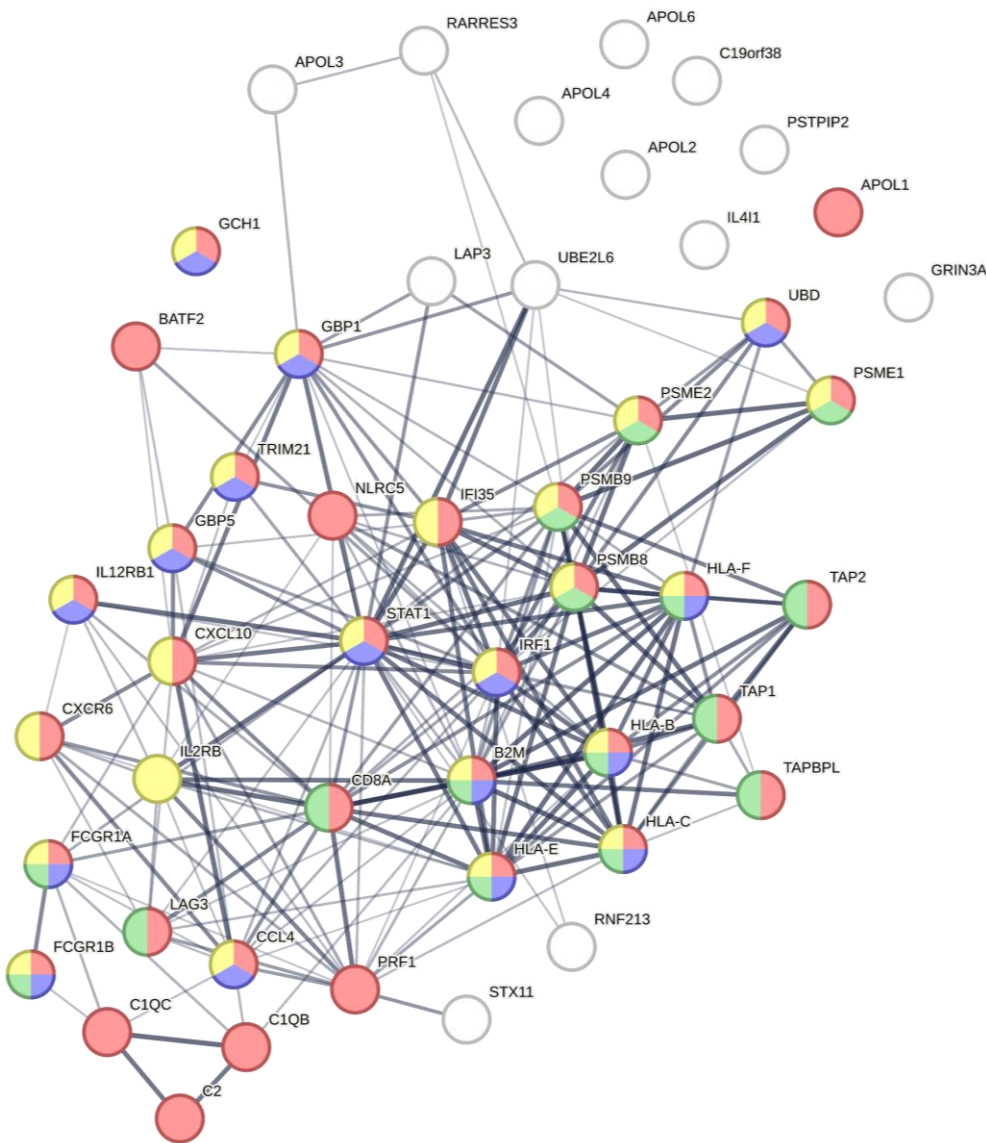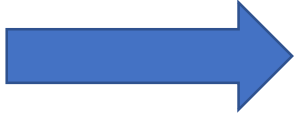

Patient survival

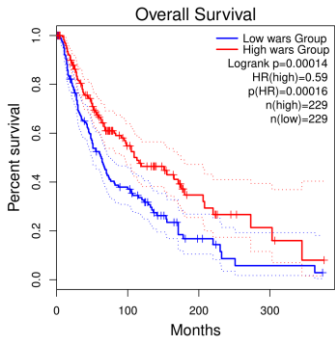

| Study Name                                                       | Study Abbreviation |
|------------------------------------------------------------------|--------------------|
| Adenoid cystic carcinoma                                         | ACC                |
| Bladder Carcinoma                                                | BLCA               |
| Breast cancer                                                    | BRCA               |
| Cervical Squamous Cell Carcinoma and Endocervical Adenocarcinoma | CESC               |
| Cholangiocarcinoma                                               | CHOL               |
| Colon Adenocarcinoma                                             | COAD               |
| Lymphoid Neoplasm Diffuse Large B-cell Lymphoma                  | DLBC               |
| Esophageal Carcinoma                                             | ESCA               |
| Glioblastoma multiforme                                          | GBM                |
| Head-Neck Squamous Cell Carcinoma                                | HNSC               |
| Kidney Chromophobe                                               | KICH               |
| Kidney Renal Clear Cell Carcinoma                                | KIRC               |
| Cervical Kidney renal papillary cell carcinoma                   | KIRP               |
| Acute Myeloid Leukemia                                           | LAML               |
| Low Grade Glioma                                                 | LGG                |
| Liver Hepatocellular Carcinoma                                   | LIHC               |
| Lung Adenocarcinoma                                              | LUAD               |
| Lung Squamous Cell Carcinoma                                     | LUSC               |
| Mesothelioma                                                     | MESO               |
| Ovarian Cancer                                                   | OV                 |
| Pancreatic Ductal Adenocarcinoma                                 | PAAD               |
| Pheochromocytoma and Paraganglioma                               | PCPG               |
| Prostate adenocarcinoma                                          | PRAD               |
| Rectum Adenocarcinoma                                            | READ               |
| Sarcoma                                                          | SARC               |
| Skin cutaneous melanoma                                          | SKCM               |
| Stomach Adenocarcinoma                                           | STAD               |
| Testicular Germ Cell Tumors                                      | TGCT               |
| Thyroid carcinoma                                                | THCA               |
| Thymoma                                                          | THYM               |
| Uterine Corpus Endometrial Carcinoma                             | UCEC               |
| Uterine Carcinosarcoma                                           | UCS                |
| Uveal Melanoma                                                   | UVM                |

Supplementary Figure S6

A

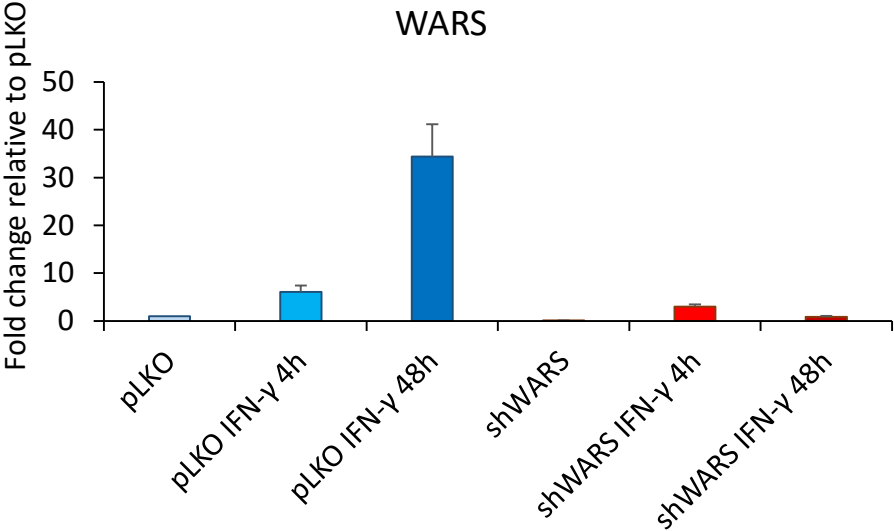

B

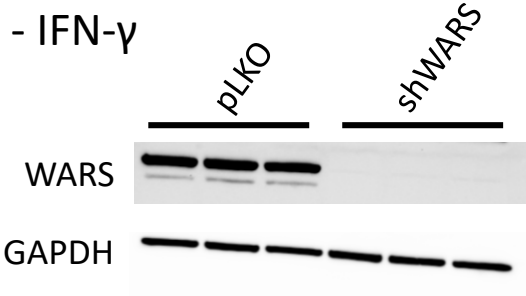

C

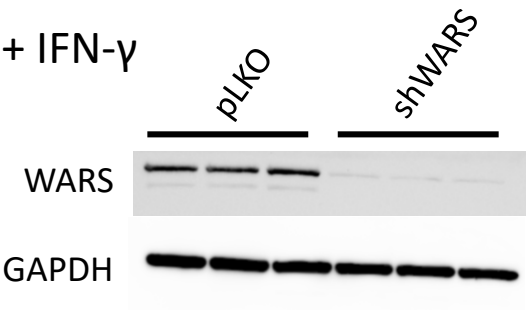

**Supplementary Figure S1: Proteins up-regulated in A375 cells following interferon- $\gamma$  treatment and enriched pathways.**

**Supplementary Figure S2: Proteins down-regulated in A375 cells following interferon- $\gamma$  treatment and enriched pathways.**

**Supplementary Figure S3: Cell viability assay of A375 cells treated with vehicle or interferon- $\gamma$ .** 5,000 A375 cells were seeded in white 96-well plates and treated with 100ng/mL of IFN- $\gamma$ . Cell viability was monitored every 24h for 4 days using Cell Titer Glo kit (Promega).

**Supplementary Figure S4: Identification of genes correlating with *WARS* using GEPIA.**

**Supplementary Figure S5: Cancer patients survival analysis of genes correlating with *WARS* using GEPIA.**

**Supplementary Figure S6: Inhibition of *WARS* expression by shRNA at the RNA (A) and protein (B-C) levels in A375 cells treated with vehicle (-IFN- $\gamma$ ) or interferon- $\gamma$  (+IFN- $\gamma$ ).**
