# Supplementary material for: Tryptophanyl-Transfer RNA Synthetase Is Involved in a Negative Feedback Loop Mitigating Interferon-γ-Induced Gene Expression
Source: Cells. 2024 Jan 17;13(2):180. doi: 10.3390/cells13020180 (PMC10813977; doi:10.3390/cells13020180)
Supplement: Supplementary file 1 [file cells-13-00180-s001.zip]

Archive with 4 entries (4 files):
- Supplementary Figures.pdf
- Supplementary_table_S1.xlsx
- Supplementary_table_S2.xlsx
- Supplementary_table_S3.xlsx
