# Supplementary material for: Tryptophanyl-Transfer RNA Synthetase Is Involved in a Negative Feedback Loop Mitigating Interferon-γ-Induced Gene Expression
Source: Cells. 2024 Jan 17;13(2):180. doi: 10.3390/cells13020180 (PMC10813977; doi:10.3390/cells13020180)
Supplement: Supplementary file 1 [file cells-13-00180-s001.zip › Supplementary_table_S1.xlsx]

## Sheet: Feuil1
Supplementary Table S1: List of primers used in this study
	Forward	Reverse
H3A	AAGCAGACTGCCCGCAAAT	GGCCTGTAACGATGAGGTTTC
IDO1	GCCAGCTTCGAGAAAGAGTTG	ATCCCAGAACTAGACGTGCAA
IFI35	AACAAAAGGAGCACACGATCA	CTCCGTTCCTAGTCTTGCCAA
GBP1	CAGCCCTACAACTTCGGAACA	TCTGGATTCGCCATCAGTCG
GBP2	CTATCTGCAATTACGCAGCCT	TGTTCTGGCTTCTTGGGATGA
PSMB8	CACGCTCGCCTTCAAGTTC	AGGCACTAATGTAGGACCCAG
ICAM1	TCTTCCTCGGCCTTCCCATA	AGGTACCATGGCCCCAAATG
ISG15	CGCAGATCACCCAGAAGATCG	TTCGTCGCATTTGTCCACCA
APOL1	TGGACTACGGAAAGAAGTGGT	CCTCCTTCAATTTGTCAAGGCTT
STAT1	CAGCTTGACTCAAAATTCCTGGA	TGAAGATTACGCTTGCTTTTCCT
HLA-A	AAAAGGAGGGAGTTACACTCAGG	GCTGTGAGGGACACATCAGAG
HLA-C	CACAGAAGTACAAGCGCCAG	CCTCGTTCAGGGCGATGTAA
