# Supplementary material for: Tryptophanyl-Transfer RNA Synthetase Is Involved in a Negative Feedback Loop Mitigating Interferon-γ-Induced Gene Expression
Source: Cells. 2024 Jan 17;13(2):180. doi: 10.3390/cells13020180 (PMC10813977; doi:10.3390/cells13020180)
Supplement: Supplementary file 1 [file cells-13-00180-s001.zip › Supplementary_table_S2.xlsx]

## Sheet: Feuil1
Protein IDs	Majority protein IDs	Peptide counts (all)	Peptide counts (razor+unique)	Peptide counts (unique)	Protein names	Gene names	Number of proteins	Sequence coverage [%]	Unique + razor sequence coverage [%]	Unique sequence coverage [%]	Mol. weight [kDa]	Sequence length	Q-value	Score	Identification type Seq54728_QE2	Identification type Seq54729_QE2	Identification type Seq54730_QE2	Identification type Seq54731_QE2	Identification type Seq54732_QE2	Identification type Seq54733_QE2	Identification type Seq54734_QE2	Identification type Seq54735_QE2	Intensity -IFN R1	Intensity -IFN R2	Intensity -IFN R3	Intensity -IFN R4	Intensity +IFN R1	Intensity +IFN R2	Intensity +IFN R3	Intensity +IFN R4
A0AV96	A0AV96	2	2	2	RNA-binding protein 47	RBM47	1	5.4	5.4	5.4	64.098	593	0.0017981	2.9428					By MS/MS	By MS/MS		By MS/MS					29959000	19817000		17868000
A0AVT1	A0AVT1	23	23	23	Ubiquitin-like modifier-activating enzyme 6	UBA6	1	28.6	28.6	28.6	117.97	1052	0	68.167	By MS/MS	By MS/MS	By MS/MS	By MS/MS	By MS/MS	By MS/MS	By MS/MS	By MS/MS	640750000	535960000	776960000	395800000	479920000	628680000	709090000	616840000
A0FGR8	A0FGR8	7	7	7	Extended synaptotagmin-2	ESYT2	1	10.3	10.3	10.3	102.36	921	0	14.88	By MS/MS	By MS/MS	By MS/MS	By MS/MS	By MS/MS	By MS/MS	By MS/MS	By MS/MS	90612000	108150000	106980000	85745000	68345000	71113000	52035000	83668000
A1L0T0	A1L0T0	10	10	10	Acetolactate synthase-like protein	ILVBL	1	24.4	24.4	24.4	67.867	632	0	45.612	By MS/MS	By MS/MS	By MS/MS	By MS/MS	By MS/MS	By MS/MS	By MS/MS	By MS/MS	426360000	556820000	488240000	387640000	362280000	282120000	373780000	430720000
A2A3N6;Q99755	A2A3N6	5;2	2;2	2;2	Putative PIP5K1A and PSMD4-like protein	PIPSL	2	5.9	2.9	2.9	95.047	862	0.0032557	2.6209	By MS/MS	By MS/MS	By MS/MS	By matching	By matching	By matching	By matching	By matching	17740000	15357000	35707000	24059000			18933000	15149000
A4D1E9	A4D1E9	4	4	4	GTP-binding protein 10	GTPBP10	1	14.2	14.2	14.2	42.932	387	0.0018154	3.0945	By matching	By matching	By matching	By matching	By MS/MS	By MS/MS	By MS/MS	By matching	45727000	42755000	31806000	32979000	41725000	18130000	54453000	40853000
A5YKK6	A5YKK6	25	25	25	CCR4-NOT transcription complex subunit 1	CNOT1	1	14.7	14.7	14.7	266.94	2376	0	61.463	By MS/MS	By MS/MS	By MS/MS	By MS/MS	By MS/MS	By MS/MS	By MS/MS	By MS/MS	236420000	451280000	373860000	275150000	316160000	267050000	387020000	362210000
A6NDG6	A6NDG6	6	6	6	Phosphoglycolate phosphatase	PGP	1	24.3	24.3	24.3	34.006	321	0	24.005	By MS/MS	By MS/MS	By MS/MS	By MS/MS	By MS/MS	By MS/MS	By MS/MS	By MS/MS	160400000	193680000	158810000	142120000	117850000	185390000	155100000	119870000
A6NDU8	A6NDU8	3	3	3	UPF0600 protein C5orf51	C5orf51	1	19.7	19.7	19.7	33.62	294	0	28.632	By MS/MS	By MS/MS	By MS/MS	By MS/MS	By MS/MS	By MS/MS	By MS/MS	By MS/MS	75354000	92723000	84499000	104600000	91640000	112290000	126020000	89250000
A6NFQ2	A6NFQ2	2	2	2	TRPM8 channel-associated factor 2	TCAF2	1	2.6	2.6	2.6	100.9	919	0.0098592	1.8369					By MS/MS	By matching	By MS/MS	By MS/MS					20810000	10138000	12865000	30474000
A6NHL2	A6NHL2	6	2	2	Tubulin alpha chain-like 3	TUBAL3	1	12.6	6.1	6.1	49.908	446	0.0018149	3.0933	By matching	By matching	By MS/MS	By MS/MS	By matching	By matching	By matching	By MS/MS			161070000	4084200		12211000		79857000
A6NHQ2	A6NHQ2	3	2	2	rRNA/tRNA 2-O-methyltransferase fibrillarin-like protein 1	FBLL1	1	6.9	3.6	3.6	34.803	334	0.00027345	3.996	By MS/MS	By MS/MS	By MS/MS	By MS/MS	By MS/MS	By MS/MS	By MS/MS	By MS/MS	282130000	294660000	234780000	229750000	272010000	314860000	281810000	301800000
A6NHR9	A6NHR9	2	2	2	Structural maintenance of chromosomes flexible hinge domain-containing protein 1	SMCHD1	1	1.2	1.2	1.2	226.37	2005	0.00027678	4.238	By MS/MS	By matching					By matching	By MS/MS	11444000	7165700					9449100	6417700
A8CG34;Q96HA1	A8CG34;Q96HA1	3;3	3;3	3;3	Nuclear envelope pore membrane protein POM 121C;Nuclear envelope pore membrane protein POM 121	POM121C;POM121	2	4.3	4.3	4.3	125.06	1229	0.00030139	6.0697	By matching	By matching	By MS/MS	By MS/MS	By matching	By MS/MS	By matching		43576000	41463000	31602000	49970000	28244000	43303000	47553000
A8MXV4	A8MXV4	3	3	3	Nucleoside diphosphate-linked moiety X motif 19, mitochondrial	NUDT19	1	11.2	11.2	11.2	42.233	375	0	8.9822	By MS/MS	By MS/MS	By matching	By matching	By MS/MS	By MS/MS	By MS/MS	By MS/MS	30952000	32506000	24014000	28765000	12018000	32224000	29105000	23078000
B1ANS9	B1ANS9	3	3	3	WD repeat-containing protein 64	WDR64	1	2.9	2.9	2.9	123.63	1081	0.0037083	2.4441	By matching	By MS/MS	By matching	By MS/MS	By MS/MS	By matching	By matching	By MS/MS	41800000	872770000	34898000	473120000	111420000	39995000	52381000	653870000
C4AMC7;Q6VEQ5;A8K0Z3;A8MWX3	C4AMC7;Q6VEQ5;A8K0Z3;A8MWX3	2;2;1;1	2;2;1;1	1;1;1;1	Putative WAS protein family homolog 3;WAS protein family homolog 2;WAS protein family homolog 1;Putative WAS protein family homolog 4	WASH3P;WASH2P;WASH1;WASH4P	4	6.7	6.7	3.7	49.994	463	0.00031358	6.9954	By MS/MS	By MS/MS	By MS/MS	By MS/MS	By matching	By MS/MS		By MS/MS		18114000	56378000	41818000	11578000	5781100		23607000
C9JLW8	C9JLW8	4	4	4	Protein FAM195B	FAM195B	1	50.5	50.5	50.5	10.92	97	0.00032733	8.2496	By MS/MS	By MS/MS	By MS/MS	By MS/MS	By MS/MS	By MS/MS	By MS/MS	By MS/MS	91901000	55710000	70682000	52456000	76474000	76428000	78962000	78500000
L0R6Q1	L0R6Q1	3	3	3		SLC35A4	1	17.5	17.5	17.5	11.133	103	0.00029002	5.245	By MS/MS	By MS/MS	By MS/MS	By MS/MS	By MS/MS	By MS/MS	By MS/MS	By MS/MS	37205000	30633000	38570000	27217000	19088000	19559000	21662000	36707000
O00116	O00116	21	21	21	Alkyldihydroxyacetonephosphate synthase, peroxisomal	AGPS	1	45.1	45.1	45.1	72.911	658	0	76.997	By MS/MS	By MS/MS	By MS/MS	By MS/MS	By MS/MS	By MS/MS	By MS/MS	By MS/MS	751510000	688160000	541910000	504400000	554760000	591490000	534620000	649700000
O00139;Q8N4N8	O00139	16;1	16;1	16;1	Kinesin-like protein KIF2A	KIF2A	2	25.6	25.6	25.6	79.954	706	0	53.758	By MS/MS	By MS/MS	By MS/MS	By MS/MS	By MS/MS	By MS/MS	By MS/MS	By MS/MS	233210000	296090000	241890000	170660000	260680000	329600000	253270000	272960000
O00148	O00148	27	27	16	ATP-dependent RNA helicase DDX39A	DDX39A	1	62.8	62.8	38.9	49.129	427	0	323.31	By MS/MS	By MS/MS	By MS/MS	By MS/MS	By MS/MS	By MS/MS	By MS/MS	By MS/MS	6537300000	7854900000	6177900000	5651700000	6143400000	6831000000	7745800000	7599900000
O00151	O00151	19	19	19	PDZ and LIM domain protein 1	PDLIM1	1	84.5	84.5	84.5	36.071	329	0	247.71	By MS/MS	By MS/MS	By MS/MS	By MS/MS	By MS/MS	By MS/MS	By MS/MS	By MS/MS	2116200000	3050200000	2634100000	2173800000	1763700000	2105000000	2289200000	1917000000
O00154;Q6ZUV0	O00154	16;1	16;1	16;1	Cytosolic acyl coenzyme A thioester hydrolase	ACOT7	2	43.9	43.9	43.9	41.796	380	0	110.48	By MS/MS	By MS/MS	By MS/MS	By MS/MS	By MS/MS	By MS/MS	By MS/MS	By MS/MS	2296800000	2348300000	2051700000	2023800000	2514700000	2454700000	2979100000	2443800000
O00159	O00159	30	30	30	Unconventional myosin-Ic	MYO1C	1	35.5	35.5	35.5	121.68	1063	0	149.79	By MS/MS	By MS/MS	By MS/MS	By MS/MS	By MS/MS	By MS/MS	By MS/MS	By MS/MS	1162300000	1604900000	1218300000	1104600000	816510000	834280000	1302600000	934700000
O00161	O00161	7	7	7	Synaptosomal-associated protein 23	SNAP23	1	45.5	45.5	45.5	23.354	211	0	38.651	By MS/MS	By MS/MS	By MS/MS	By MS/MS	By MS/MS	By MS/MS	By MS/MS	By MS/MS	198670000	218670000	127590000	129420000	130700000	112580000	165510000	149440000
O00165	O00165	5	5	5	HCLS1-associated protein X-1	HAX1	1	28.3	28.3	28.3	31.62	279	0.00030285	6.1573	By MS/MS	By MS/MS	By MS/MS	By MS/MS	By MS/MS	By MS/MS	By MS/MS	By MS/MS	67316000	63062000	78177000	41760000	56906000	54001000	31841000	63673000
O00170	O00170	16	16	16	AH receptor-interacting protein	AIP	1	66.4	66.4	66.4	37.636	330	0	115.53	By MS/MS	By MS/MS	By MS/MS	By MS/MS	By MS/MS	By MS/MS	By MS/MS	By MS/MS	1197500000	1246400000	1012900000	1051100000	794140000	964580000	904780000	909450000
O00186	O00186	6	6	6	Syntaxin-binding protein 3	STXBP3	1	10.6	10.6	10.6	67.764	592	0	19.191	By MS/MS	By MS/MS	By MS/MS	By MS/MS	By MS/MS	By MS/MS	By MS/MS	By MS/MS	144620000	177850000	110710000	95200000	97951000	104620000	90580000	124190000
O00193	O00193	5	5	5	Small acidic protein	SMAP	1	33.9	33.9	33.9	20.332	183	0	178.97	By MS/MS	By MS/MS	By MS/MS	By MS/MS	By MS/MS	By MS/MS	By MS/MS	By MS/MS	442110000	389550000	311870000	335020000	316010000	625600000	357340000	325210000
O00194	O00194	2	2	2	Ras-related protein Rab-27B	RAB27B	1	15.6	15.6	15.6	24.608	218	0.00030367	6.1934	By matching				By matching		By MS/MS	By MS/MS	33439000				926500		110320000	107710000
O00203;Q13367	O00203	14;2	14;2	14;2	AP-3 complex subunit beta-1	AP3B1	2	15.4	15.4	15.4	121.32	1094	0	30.266	By MS/MS	By MS/MS	By MS/MS	By MS/MS	By MS/MS	By MS/MS	By MS/MS	By MS/MS	471510000	505800000	323320000	328810000	352640000	482570000	512830000	376930000
O00214	O00214	5	5	5	Galectin-8	LGALS8	1	16.1	16.1	16.1	35.808	317	0.00031878	7.4717	By MS/MS	By MS/MS	By MS/MS	By matching	By matching	By MS/MS	By MS/MS	By MS/MS	42171000	102950000	38924000	27679000	36401000	48424000	34989000	27251000
O00217	O00217	6	6	6	NADH dehydrogenase [ubiquinone] iron-sulfur protein 8, mitochondrial	NDUFS8	1	31.4	31.4	31.4	23.705	210	0	29.261	By MS/MS	By MS/MS	By MS/MS	By MS/MS	By MS/MS	By MS/MS	By MS/MS	By MS/MS	389790000	378340000	340630000	292360000	381880000	243930000	425420000	267560000
O00231	O00231	28	28	28	26S proteasome non-ATPase regulatory subunit 11	PSMD11	1	58.3	58.3	58.3	47.463	422	0	145.32	By MS/MS	By MS/MS	By MS/MS	By MS/MS	By MS/MS	By MS/MS	By MS/MS	By MS/MS	2793100000	2978300000	2134200000	2083400000	2138400000	2340000000	2974500000	2286200000
O00232	O00232	23	23	23	26S proteasome non-ATPase regulatory subunit 12	PSMD12	1	50.2	50.2	50.2	52.904	456	0	183.45	By MS/MS	By MS/MS	By MS/MS	By MS/MS	By MS/MS	By MS/MS	By MS/MS	By MS/MS	2227600000	2902300000	2206300000	1860500000	2193600000	1901300000	2383500000	2498700000
O00233	O00233	8	8	8	26S proteasome non-ATPase regulatory subunit 9	PSMD9	1	35.9	35.9	35.9	24.682	223	0	34.139	By MS/MS	By MS/MS	By MS/MS	By MS/MS	By MS/MS	By MS/MS	By MS/MS	By MS/MS	373290000	497850000	353860000	366110000	489050000	377730000	558230000	450620000
O00244	O00244	7	7	7	Copper transport protein ATOX1	ATOX1	1	88.2	88.2	88.2	7.4016	68	0	46.491	By MS/MS	By MS/MS	By MS/MS	By MS/MS	By MS/MS	By MS/MS	By MS/MS	By MS/MS	1066600000	1264300000	936830000	955650000	843510000	1045500000	1166500000	904940000
O00264	O00264	7	7	6	Membrane-associated progesterone receptor component 1	PGRMC1	1	43.1	43.1	38.5	21.671	195	0	23.048	By MS/MS	By MS/MS	By MS/MS	By MS/MS	By MS/MS	By MS/MS	By MS/MS	By MS/MS	410490000	451310000	377090000	287950000	329380000	304090000	357980000	379270000
O00267	O00267	24	24	24	Transcription elongation factor SPT5	SUPT5H	1	31.6	31.6	31.6	121	1087	0	166.32	By MS/MS	By MS/MS	By MS/MS	By MS/MS	By MS/MS	By MS/MS	By MS/MS	By MS/MS	695100000	660720000	516770000	392410000	645420000	485970000	662280000	688280000
O00273	O00273	9	9	9	DNA fragmentation factor subunit alpha	DFFA	1	35.3	35.3	35.3	36.521	331	0	31.436	By MS/MS	By MS/MS	By MS/MS	By MS/MS	By MS/MS	By MS/MS	By MS/MS	By MS/MS	464010000	545320000	474810000	390320000	433560000	426050000	465420000	487150000
O00299	O00299	18	18	18	Chloride intracellular channel protein 1	CLIC1	1	80.9	80.9	80.9	26.922	241	0	323.31	By MS/MS	By MS/MS	By MS/MS	By MS/MS	By MS/MS	By MS/MS	By MS/MS	By MS/MS	5518000000	5658700000	5038200000	4354900000	4034400000	4521800000	5588500000	4725000000
O00303	O00303	17	17	17	Eukaryotic translation initiation factor 3 subunit F	EIF3F	1	54.9	54.9	54.9	37.563	357	0	236.36	By MS/MS	By MS/MS	By MS/MS	By MS/MS	By MS/MS	By MS/MS	By MS/MS	By MS/MS	2482800000	3170800000	2354300000	2291600000	1760000000	2503900000	2582700000	2710800000
O00330	O00330	4	4	4	Pyruvate dehydrogenase protein X component, mitochondrial	PDHX	1	10.2	10.2	10.2	54.122	501	0.0013161	3.3299	By MS/MS	By matching	By MS/MS	By MS/MS	By MS/MS	By matching	By matching	By MS/MS	52802000	48418000	92191000	46860000	59012000	54616000	11093000	65485000
O00399	O00399	2	2	2	Dynactin subunit 6	DCTN6	1	16.8	16.8	16.8	20.747	190	0.0015654	3.1765	By MS/MS	By matching	By MS/MS	By MS/MS	By MS/MS	By MS/MS	By matching	By matching	52111000	8437800	26826000	56157000	15637000	68148000	76371000	57840000
O00401	O00401	2	2	2	Neural Wiskott-Aldrich syndrome protein	WASL	1	9.3	9.3	9.3	54.826	505	0	10.132	By MS/MS	By MS/MS	By MS/MS	By MS/MS	By MS/MS	By MS/MS	By MS/MS	By MS/MS	52535000	43601000	53958000	32116000	23688000	21648000	35750000	50126000
O00410	O00410	53	53	51	Importin-5	IPO5	1	65.5	65.5	64.8	123.63	1097	0	323.31	By MS/MS	By MS/MS	By MS/MS	By MS/MS	By MS/MS	By MS/MS	By MS/MS	By MS/MS	6541400000	8592600000	6827900000	5463000000	5615200000	5604800000	6326800000	6643100000
O00411	O00411	2	2	2	DNA-directed RNA polymerase, mitochondrial	POLRMT	1	3.7	3.7	3.7	138.62	1230	0	9.0575	By MS/MS	By MS/MS		By MS/MS					18925000	27596000		24487000
O00422	O00422	8	8	8	Histone deacetylase complex subunit SAP18	SAP18	1	44.4	44.4	44.4	17.561	153	0	49.251	By MS/MS	By MS/MS	By MS/MS	By MS/MS	By MS/MS	By MS/MS	By MS/MS	By MS/MS	354090000	453820000	390630000	193020000	266650000	342600000	307460000	251500000
O00425	O00425	17	17	17	Insulin-like growth factor 2 mRNA-binding protein 3	IGF2BP3	1	38	38	38	63.704	579	0	97.912	By MS/MS	By MS/MS	By MS/MS	By MS/MS	By MS/MS	By MS/MS	By MS/MS	By MS/MS	733490000	1044200000	691460000	633460000	780710000	659090000	995060000	752440000
O00429	O00429	38	38	38	Dynamin-1-like protein	DNM1L	1	63.2	63.2	63.2	81.876	736	0	323.31	By MS/MS	By MS/MS	By MS/MS	By MS/MS	By MS/MS	By MS/MS	By MS/MS	By MS/MS	2402600000	3863800000	2703300000	2291700000	2921800000	2934900000	3168800000	3064500000
O00442	O00442	8	8	8	RNA 3-terminal phosphate cyclase	RTCA	1	36.6	36.6	36.6	39.336	366	0	37.177	By MS/MS	By MS/MS	By MS/MS	By MS/MS	By MS/MS	By MS/MS	By MS/MS	By MS/MS	388260000	457400000	417830000	269660000	394530000	502780000	505900000	447420000
O00458	O00458	3	3	3	Interferon-related developmental regulator 1	IFRD1	1	6.7	6.7	6.7	50.268	451	0.00027832	4.3391			By matching		By MS/MS	By MS/MS	By MS/MS	By MS/MS			4637700		28880000	43242000	30902000	27347000
O00469	O00469	4	4	4	Procollagen-lysine,2-oxoglutarate 5-dioxygenase 2	PLOD2	1	6.1	6.1	6.1	84.685	737	0	9.3452	By MS/MS	By MS/MS	By MS/MS	By MS/MS	By MS/MS	By MS/MS	By MS/MS	By MS/MS	48204000	58880000	62033000	78843000	37466000	28913000	44266000	54415000
O00471	O00471	3	3	3	Exocyst complex component 5	EXOC5	1	5.5	5.5	5.5	81.852	708	0.00031807	7.3953	By matching	By matching	By MS/MS	By MS/MS	By MS/MS	By matching	By MS/MS	By matching	32685000	24706000	19056000	13582000	21855000	15659000	22806000	22093000
O00483	O00483	4	4	4	Cytochrome c oxidase subunit NDUFA4	NDUFA4	1	46.9	46.9	46.9	9.3697	81	0.00033113	8.5701	By MS/MS	By MS/MS	By MS/MS	By MS/MS	By MS/MS	By MS/MS	By MS/MS	By MS/MS	369890000	391540000	296220000	232290000	302650000	277160000	289370000	316330000
O00487	O00487	14	14	14	26S proteasome non-ATPase regulatory subunit 14	PSMD14	1	84.5	84.5	84.5	34.577	310	0	136.87	By MS/MS	By MS/MS	By MS/MS	By MS/MS	By MS/MS	By MS/MS	By MS/MS	By MS/MS	1728000000	1890200000	1668100000	1402300000	1574500000	1549700000	1873900000	1633100000
O00505	O00505	11	6	6	Importin subunit alpha-4	KPNA3	1	32.6	23.8	23.8	57.81	521	0	70.764	By MS/MS	By MS/MS	By MS/MS	By MS/MS	By MS/MS	By MS/MS	By MS/MS	By MS/MS	683960000	660530000	489420000	411220000	158320000	426180000	522990000	463710000
O00541	O00541	21	21	21	Pescadillo homolog	PES1	1	43.5	43.5	43.5	68.002	588	0	79.221	By MS/MS	By MS/MS	By MS/MS	By MS/MS	By MS/MS	By MS/MS	By MS/MS	By MS/MS	1026300000	1522300000	958960000	1066800000	853540000	1008200000	785850000	1107100000
O00560	O00560	10	10	10	Syntenin-1	SDCBP	1	44.3	44.3	44.3	32.444	298	0	186.01	By MS/MS	By MS/MS	By MS/MS	By MS/MS	By MS/MS	By MS/MS	By MS/MS	By MS/MS	555120000	571870000	460110000	307500000	459540000	496810000	482690000	503860000
O00566	O00566	7	7	7	U3 small nucleolar ribonucleoprotein protein MPP10	MPHOSPH10	1	15.9	15.9	15.9	78.863	681	0	58.028	By MS/MS	By MS/MS	By MS/MS	By MS/MS	By MS/MS	By MS/MS	By MS/MS	By MS/MS	178190000	290090000	306880000	234470000	247400000	292070000	349430000	314780000
O00567	O00567	36	36	36	Nucleolar protein 56	NOP56	1	66.7	66.7	66.7	66.049	594	0	241.46	By MS/MS	By MS/MS	By MS/MS	By MS/MS	By MS/MS	By MS/MS	By MS/MS	By MS/MS	3459400000	4954700000	3812600000	3434200000	3955400000	3993200000	4046200000	4873300000
O00571;O15523;Q9NQI0	O00571;O15523	39;27;2	38;26;2	38;26;2	ATP-dependent RNA helicase DDX3X;ATP-dependent RNA helicase DDX3Y	DDX3X;DDX3Y	3	64.2	62.5	62.5	73.243	662	0	310.14	By MS/MS	By MS/MS	By MS/MS	By MS/MS	By MS/MS	By MS/MS	By MS/MS	By MS/MS	8276700000	9718300000	8275900000	6534000000	6699400000	6719100000	8079000000	7728500000
O00592	O00592	3	3	3	Podocalyxin	PODXL	1	5	5	5	58.635	558	0	44.414	By MS/MS	By MS/MS	By MS/MS	By MS/MS	By MS/MS	By MS/MS	By MS/MS	By MS/MS	178160000	195780000	177730000	97390000	76693000	75662000	119240000	123420000
O00625	O00625	12	12	12	Pirin	PIR	1	67.6	67.6	67.6	32.113	290	0	59.068	By MS/MS	By MS/MS	By MS/MS	By MS/MS	By MS/MS	By MS/MS	By MS/MS	By MS/MS	935860000	1024100000	899490000	785700000	911540000	898290000	751850000	1026100000
O00629	O00629	17	17	12	Importin subunit alpha-3	KPNA4	1	50.5	50.5	41.7	57.886	521	0	215.16	By MS/MS	By MS/MS	By MS/MS	By MS/MS	By MS/MS	By MS/MS	By MS/MS	By MS/MS	1405900000	1592700000	1272000000	1055000000	1093500000	1159500000	2025600000	1285800000
O00743	O00743	5	5	5	Serine/threonine-protein phosphatase 6 catalytic subunit;Serine/threonine-protein phosphatase 6 catalytic subunit, N-terminally processed	PPP6C	1	21.3	21.3	21.3	35.144	305	0	9.8712	By MS/MS	By MS/MS	By MS/MS	By MS/MS	By MS/MS	By MS/MS	By matching	By MS/MS	50422000	66850000	95008000	79750000	29750000	85512000	58821000	40415000
O00754	O00754	3	3	3	Lysosomal alpha-mannosidase;Lysosomal alpha-mannosidase A peptide;Lysosomal alpha-mannosidase B peptide;Lysosomal alpha-mannosidase C peptide;Lysosomal alpha-mannosidase D peptide;Lysosomal alpha-mannosidase E peptide	MAN2B1	1	4	4	4	113.74	1011	0.00029586	5.7094	By MS/MS	By MS/MS	By matching	By MS/MS	By matching	By MS/MS	By MS/MS	By MS/MS	51163000	64669000	36429000	48048000	36688000	53572000	38876000	60823000
O00762	O00762	7	7	7	Ubiquitin-conjugating enzyme E2 C	UBE2C	1	60.3	60.3	60.3	19.652	179	0	25.686	By MS/MS	By MS/MS	By MS/MS	By MS/MS	By matching	By MS/MS	By MS/MS	By matching	378200000	436240000	355280000	291730000	16977000	35509000	69973000	89036000
O00764	O00764	7	7	7	Pyridoxal kinase	PDXK	1	36.5	36.5	36.5	35.102	312	0	38.257	By MS/MS	By MS/MS	By MS/MS	By MS/MS	By MS/MS	By MS/MS	By MS/MS	By MS/MS	384560000	348040000	202670000	210680000	201720000	202260000	451380000	414030000
O00767	O00767	4	4	4	Acyl-CoA desaturase	SCD	1	22.6	22.6	22.6	41.522	359	0	38.68	By MS/MS	By MS/MS	By MS/MS	By MS/MS	By matching	By MS/MS	By matching	By MS/MS	301000000	360770000	216180000	140040000	35706000	33590000	28647000	32941000
O14497;Q8NFD5	O14497	11;1	11;1	11;1	AT-rich interactive domain-containing protein 1A	ARID1A	2	7	7	7	242.04	2285	0	26.237	By MS/MS	By MS/MS	By MS/MS	By MS/MS	By MS/MS	By MS/MS	By MS/MS	By MS/MS	103870000	153020000	181220000	61594000	169920000	109620000	86054000	164330000
O14519	O14519	2	2	2	Cyclin-dependent kinase 2-associated protein 1	CDK2AP1	1	41.7	41.7	41.7	12.365	115	0.00032701	8.1535	By MS/MS	By MS/MS	By matching	By MS/MS	By MS/MS	By matching	By MS/MS	By matching	63384000	83316000	54384000	94880000	34471000	43104000	74784000	49218000
O14530	O14530	2	2	2	Thioredoxin domain-containing protein 9	TXNDC9	1	15	15	15	26.534	226	0	25.828	By MS/MS	By MS/MS	By MS/MS	By MS/MS	By MS/MS	By MS/MS	By MS/MS	By MS/MS	95396000	120370000	81410000	71527000	55138000	61639000	70129000	65508000
O14545	O14545	2	2	2	TRAF-type zinc finger domain-containing protein 1	TRAFD1	1	6	6	6	64.84	582	0.00030637	6.3927	By matching	By MS/MS		By MS/MS	By MS/MS	By MS/MS	By MS/MS	By MS/MS	14197000	11124000			62560000	87926000	37856000	64292000
O14548	O14548	2	2	2	Cytochrome c oxidase subunit 7A-related protein, mitochondrial	COX7A2L	1	40.4	40.4	40.4	12.615	114	0.00033025	8.468	By MS/MS	By MS/MS	By MS/MS	By MS/MS	By MS/MS	By MS/MS	By MS/MS	By MS/MS	27839000	22381000	18335000	20750000	27666000	21394000	18842000	35701000
O14556	O14556	2	1	1	Glyceraldehyde-3-phosphate dehydrogenase, testis-specific	GAPDHS	1	3.9	2.2	2.2	44.501	408	1	-2	By matching	By MS/MS	By matching	By matching	By matching	By matching	By matching	By matching		63830000	27474000	24897000				30121000
O14561	O14561	5	5	5	Acyl carrier protein, mitochondrial	NDUFAB1	1	23.7	23.7	23.7	17.417	156	0	35.208	By MS/MS	By MS/MS	By MS/MS	By MS/MS	By MS/MS	By MS/MS	By MS/MS	By MS/MS	941720000	1106700000	1044400000	813570000	830540000	736990000	778340000	919770000
O14562	O14562	4	4	4	Ubiquitin domain-containing protein UBFD1	UBFD1	1	16.8	16.8	16.8	33.382	309	0	13.281	By MS/MS	By MS/MS	By MS/MS	By MS/MS	By MS/MS	By MS/MS	By MS/MS	By MS/MS	86069000	115440000	127010000	66215000	64866000	95536000	69031000	131180000
O14576	O14576	2	2	2	Cytoplasmic dynein 1 intermediate chain 1	DYNC1I1	1	6.7	6.7	6.7	72.955	645	0.0018004	2.9739	By MS/MS	By MS/MS	By matching				By MS/MS	By matching	375940000	32570000	27605000				239270000	65648000
O14578	O14578	3	3	3	Citron Rho-interacting kinase	CIT	1	1.3	1.3	1.3	231.43	2027	0.0036973	2.4218	By MS/MS	By MS/MS	By MS/MS			By MS/MS		By MS/MS	188920000	172820000	140440000			17268000		185130000
O14579	O14579	15	15	15	Coatomer subunit epsilon	COPE	1	79.2	79.2	79.2	34.482	308	0	279.31	By MS/MS	By MS/MS	By MS/MS	By MS/MS	By MS/MS	By MS/MS	By MS/MS	By MS/MS	1422200000	1572100000	1138800000	876040000	985600000	1061800000	1984400000	1683700000
O14617	O14617	14	14	14	AP-3 complex subunit delta-1	AP3D1	1	18	18	18	130.16	1153	0	52.192	By MS/MS	By MS/MS	By MS/MS	By MS/MS	By MS/MS	By MS/MS	By MS/MS	By MS/MS	302410000	715960000	377840000	527810000	414190000	427580000	277140000	488470000
O14618	O14618	2	2	2	Copper chaperone for superoxide dismutase	CCS	1	7.7	7.7	7.7	29.04	274	0.00027137	3.8954	By MS/MS	By MS/MS	By MS/MS	By MS/MS	By MS/MS	By MS/MS		By MS/MS	32845000	28277000	36379000	19558000	14976000	15479000		18220000
O14662	O14662	2	2	2	Syntaxin-16	STX16	1	5.2	5.2	5.2	37.031	325	0.0043999	2.2926	By MS/MS	By MS/MS		By MS/MS	By MS/MS		By MS/MS	By MS/MS	8304000	9100500		7744200	204770000		6399500	8922800
O14734	O14734	2	2	2	Acyl-coenzyme A thioesterase 8	ACOT8	1	8.5	8.5	8.5	35.914	319	0.0015727	3.2369	By MS/MS	By MS/MS	By MS/MS	By MS/MS	By MS/MS	By matching	By MS/MS	By MS/MS	525130000	482590000	358080000	509010000	568570000	566060000	662570000	475110000
O14735	O14735	3	3	3	CDP-diacylglycerol--inositol 3-phosphatidyltransferase	CDIPT	1	16	16	16	23.539	213	0.00030266	6.1421	By MS/MS	By MS/MS	By matching	By MS/MS	By MS/MS	By matching	By MS/MS	By MS/MS	27704000	72747000	98724000	27392000	29704000	63050000	14674000	99821000
O14737	O14737	9	9	9	Programmed cell death protein 5	PDCD5	1	67.2	67.2	67.2	14.285	125	0	62.047	By MS/MS	By MS/MS	By MS/MS	By MS/MS	By MS/MS	By MS/MS	By MS/MS	By MS/MS	1375100000	1286800000	1048800000	1100700000	1005500000	1050900000	1243600000	1062300000
O14744	O14744	21	21	21	Protein arginine N-methyltransferase 5;Protein arginine N-methyltransferase 5, N-terminally processed	PRMT5	1	35.8	35.8	35.8	72.683	637	0	65.353	By MS/MS	By MS/MS	By MS/MS	By MS/MS	By MS/MS	By MS/MS	By MS/MS	By MS/MS	1140700000	1287600000	958130000	805870000	839090000	697460000	755030000	728450000
O14745	O14745	7	7	7	Na(+)/H(+) exchange regulatory cofactor NHE-RF1	SLC9A3R1	1	28.5	28.5	28.5	38.868	358	0	32.685	By MS/MS	By MS/MS	By MS/MS	By MS/MS	By MS/MS	By MS/MS	By MS/MS	By MS/MS	447920000	427300000	347550000	273040000	258440000	285180000	408620000	256070000
O14773	O14773	5	5	5	Tripeptidyl-peptidase 1	TPP1	1	14	14	14	61.247	563	0.00032362	7.8571	By MS/MS	By MS/MS	By MS/MS	By MS/MS	By MS/MS	By MS/MS	By MS/MS	By MS/MS	204340000	275670000	195670000	152320000	185910000	140560000	158470000	233560000
O14776	O14776	17	17	16	Transcription elongation regulator 1	TCERG1	1	18.6	18.6	17.7	123.9	1098	0	45.753	By MS/MS	By MS/MS	By MS/MS	By MS/MS	By MS/MS	By MS/MS	By MS/MS	By MS/MS	419520000	475850000	394100000	333940000	415130000	397460000	544330000	524280000
O14787	O14787	14	7	7	Transportin-2	TNPO2	1	23.2	14.7	14.7	101.39	897	0	22.566	By MS/MS	By MS/MS	By MS/MS	By MS/MS	By MS/MS	By MS/MS	By MS/MS	By MS/MS	247330000	99850000	137920000	71857000	89649000	90738000	259070000	304530000
O14802	O14802	9	8	8	DNA-directed RNA polymerase III subunit RPC1	POLR3A	1	9.3	8.6	8.6	155.64	1390	0	10.457	By matching	By MS/MS	By MS/MS	By MS/MS	By MS/MS	By matching	By MS/MS	By MS/MS	77905000	121070000	131060000	93234000	114500000	96084000	110710000	105010000
O14818;Q8TAA3	O14818	18;5	18;5	18;5	Proteasome subunit alpha type-7	PSMA7	2	71.4	71.4	71.4	27.887	248	0	240.31	By MS/MS	By MS/MS	By MS/MS	By MS/MS	By MS/MS	By MS/MS	By MS/MS	By MS/MS	3821500000	3840700000	2894300000	2846700000	3474900000	3696600000	3979600000	4277500000
O14828	O14828	7	7	7	Secretory carrier-associated membrane protein 3	SCAMP3	1	33.1	33.1	33.1	38.287	347	0	56.409	By MS/MS	By MS/MS	By MS/MS	By MS/MS	By MS/MS	By MS/MS	By MS/MS	By MS/MS	616360000	651210000	515870000	419880000	307970000	471440000	616180000	450320000
O14879	O14879	12	12	12	Interferon-induced protein with tetratricopeptide repeats 3	IFIT3	1	34.9	34.9	34.9	55.984	490	0	52.797		By matching	By matching		By MS/MS	By MS/MS	By MS/MS	By MS/MS		27671000	17147000		142140000	318820000	167650000	207350000
O14880	O14880	3	3	3	Microsomal glutathione S-transferase 3	MGST3	1	18.4	18.4	18.4	16.516	152	0.0025458	2.8181	By MS/MS	By MS/MS	By MS/MS	By MS/MS	By MS/MS	By MS/MS	By matching	By MS/MS	64704000	77013000	46217000	17255000	32984000	30099000	8578000	41199000
O14908;Q8TF64	O14908	7;1	7;1	7;1	PDZ domain-containing protein GIPC1	GIPC1	2	26.4	26.4	26.4	36.049	333	0	34.902	By MS/MS	By MS/MS	By MS/MS	By MS/MS	By MS/MS	By MS/MS	By MS/MS	By MS/MS	396380000	478520000	362590000	271490000	206830000	216590000	131080000	226200000
O14929	O14929	10	10	10	Histone acetyltransferase type B catalytic subunit	HAT1	1	40.8	40.8	40.8	49.512	419	0	108.19	By MS/MS	By MS/MS	By MS/MS	By MS/MS	By MS/MS	By MS/MS	By MS/MS	By MS/MS	633500000	677510000	512120000	455370000	407280000	432530000	531490000	445070000
O14933	O14933	11	11	11	Ubiquitin/ISG15-conjugating enzyme E2 L6	UBE2L6	1	81	81	81	17.769	153	0	137.69	By MS/MS	By MS/MS	By MS/MS	By MS/MS	By MS/MS	By MS/MS	By MS/MS	By MS/MS	301720000	595370000	270280000	327960000	2635000000	2022100000	3257400000	2962600000
O14949	O14949	3	3	3	Cytochrome b-c1 complex subunit 8	UQCRQ	1	36.6	36.6	36.6	9.9062	82	0.00029429	5.5455	By MS/MS	By MS/MS	By MS/MS	By MS/MS	By MS/MS	By MS/MS	By MS/MS	By MS/MS	223240000	218010000	164140000	105220000	149450000	156060000	206380000	158350000
O14964	O14964	11	11	11	Hepatocyte growth factor-regulated tyrosine kinase substrate	HGS	1	16.2	16.2	16.2	86.191	777	0	32.338	By MS/MS	By MS/MS	By MS/MS	By MS/MS	By MS/MS	By MS/MS	By MS/MS	By MS/MS	416090000	504330000	392900000	322580000	358560000	356870000	394660000	441260000
O14972	O14972	3	3	3	Down syndrome critical region protein 3	DSCR3	1	14.5	14.5	14.5	33.01	297	0.00032531	7.9963	By MS/MS	By MS/MS	By MS/MS	By MS/MS	By MS/MS	By MS/MS	By MS/MS	By MS/MS	12359000	15853000	16684000	26428000	13604000	26099000	11871000	44704000
O14974	O14974	23	23	23	Protein phosphatase 1 regulatory subunit 12A	PPP1R12A	1	29.8	29.8	29.8	115.28	1030	0	135.55	By MS/MS	By MS/MS	By MS/MS	By MS/MS	By MS/MS	By MS/MS	By MS/MS	By MS/MS	699480000	648450000	421420000	326700000	530270000	426290000	902020000	636030000
O14976	O14976	9	9	9	Cyclin-G-associated kinase	GAK	1	10.8	10.8	10.8	143.19	1311	0	48.782	By MS/MS	By MS/MS	By MS/MS	By MS/MS	By MS/MS	By MS/MS	By MS/MS	By MS/MS	239450000	203610000	161930000	151320000	156160000	188800000	241400000	243330000
O14979	O14979	16	15	15	Heterogeneous nuclear ribonucleoprotein D-like	HNRNPDL	1	33.8	31.9	31.9	46.437	420	0	121.66	By MS/MS	By MS/MS	By MS/MS	By MS/MS	By MS/MS	By MS/MS	By MS/MS	By MS/MS	2587400000	2825100000	2058600000	1961300000	1707400000	2234400000	2116400000	1725400000
O14980	O14980	48	48	48	Exportin-1	XPO1	1	51.9	51.9	51.9	123.38	1071	0	323.31	By MS/MS	By MS/MS	By MS/MS	By MS/MS	By MS/MS	By MS/MS	By MS/MS	By MS/MS	5205100000	7557500000	5895600000	5100900000	5691700000	5181900000	5605700000	6363600000
O14981	O14981	7	7	7	TATA-binding protein-associated factor 172	BTAF1	1	5.2	5.2	5.2	206.89	1849	0	12.117	By MS/MS	By MS/MS	By MS/MS	By MS/MS	By MS/MS	By MS/MS	By MS/MS	By matching	57969000	66544000	28106000	53957000	60380000	54642000	73769000	53390000
O15020	O15020	10	4	4	Spectrin beta chain, non-erythrocytic 2	SPTBN2	1	5.9	2.9	2.9	271.32	2390	0	17.776	By MS/MS	By MS/MS	By MS/MS	By MS/MS	By matching	By matching	By matching	By MS/MS	71750000	36276000	56236000	52607000	16493000		16367000	19468000
O15027	O15027	14	14	14	Protein transport protein Sec16A	SEC16A	1	12.9	12.9	12.9	233.51	2179	0	67.068	By MS/MS	By MS/MS	By MS/MS	By MS/MS	By MS/MS	By MS/MS	By MS/MS	By MS/MS	292450000	297080000	232060000	212000000	196850000	235330000	408200000	252080000
O15042	O15042	18	18	18	U2 snRNP-associated SURP motif-containing protein	U2SURP	1	26.5	26.5	26.5	118.29	1029	0	82.612	By MS/MS	By MS/MS	By MS/MS	By MS/MS	By MS/MS	By MS/MS	By MS/MS	By MS/MS	955580000	816120000	822080000	838650000	584490000	698960000	482980000	866690000
O15067	O15067	34	34	34	Phosphoribosylformylglycinamidine synthase	PFAS	1	39.2	39.2	39.2	144.73	1338	0	178.3	By MS/MS	By MS/MS	By MS/MS	By MS/MS	By MS/MS	By MS/MS	By MS/MS	By MS/MS	1746400000	2207400000	1563100000	1841700000	1413800000	1364200000	1849600000	1611900000
O15078	O15078	2	2	2	Centrosomal protein of 290 kDa	CEP290	1	1	1	1	290.38	2479	1	-2	By matching	By MS/MS	By MS/MS	By matching	By matching		By MS/MS	By matching	258440000	322220000	256330000	198560000	218800000		57885000	246320000
O15084;Q8N8A2	O15084	6;1	6;1	6;1	Serine/threonine-protein phosphatase 6 regulatory ankyrin repeat subunit A	ANKRD28	2	9.8	9.8	9.8	112.96	1053	0.00029612	5.7253	By MS/MS	By MS/MS	By MS/MS	By matching	By MS/MS	By MS/MS	By MS/MS	By MS/MS	115630000	115820000	201620000	142390000	105880000	148550000	130500000	103060000
O15111	O15111	3	3	3	Inhibitor of nuclear factor kappa-B kinase subunit alpha	CHUK	1	5.8	5.8	5.8	84.639	745	0.00029913	5.9194	By matching		By MS/MS	By matching	By matching	By matching	By MS/MS	By MS/MS	27713000		46855000	12017000	17159000	50379000	72389000	16953000
O15118	O15118	7	7	7	Niemann-Pick C1 protein	NPC1	1	8.9	8.9	8.9	142.17	1278	0	13.062	By MS/MS	By MS/MS	By matching	By MS/MS	By MS/MS	By MS/MS	By MS/MS	By MS/MS	88390000	141740000	108710000	67653000	140800000	73447000	226750000	106320000
O15126	O15126	5	5	5	Secretory carrier-associated membrane protein 1	SCAMP1	1	26	26	26	37.92	338	0	22.326	By MS/MS	By MS/MS	By MS/MS	By MS/MS	By MS/MS	By MS/MS	By matching	By matching	2126500000	2305200000	1940400000	1847500000	79128000	68161000	32607000	56109000
O15127	O15127	2	2	2	Secretory carrier-associated membrane protein 2	SCAMP2	1	9.7	9.7	9.7	36.648	329	0	24.92	By MS/MS	By MS/MS	By matching		By matching	By MS/MS	By matching	By matching	72002000	95789000	66523000		66903000	50767000	69126000	73799000
O15143	O15143	15	15	14	Actin-related protein 2/3 complex subunit 1B	ARPC1B	1	53.2	53.2	47	40.949	372	0	83.253	By MS/MS	By MS/MS	By MS/MS	By MS/MS	By MS/MS	By MS/MS	By MS/MS	By MS/MS	1857600000	2224300000	1731200000	1494000000	1476800000	1438700000	1613900000	1679900000
O15144	O15144	17	17	17	Actin-related protein 2/3 complex subunit 2	ARPC2	1	60.7	60.7	60.7	34.333	300	0	66.843	By MS/MS	By MS/MS	By MS/MS	By MS/MS	By MS/MS	By MS/MS	By MS/MS	By MS/MS	1562700000	1711400000	1397600000	1302600000	1382300000	1361600000	1334500000	1332400000
O15145	O15145	7	7	7	Actin-related protein 2/3 complex subunit 3	ARPC3	1	38.8	38.8	38.8	20.546	178	0	36.314	By MS/MS	By MS/MS	By MS/MS	By MS/MS	By MS/MS	By MS/MS	By MS/MS	By MS/MS	983630000	1149900000	935500000	726740000	906020000	768310000	871300000	781320000
O15160	O15160	10	10	10	DNA-directed RNA polymerases I and III subunit RPAC1	POLR1C	1	41.3	41.3	41.3	39.249	346	0	94.134	By MS/MS	By MS/MS	By MS/MS	By MS/MS	By MS/MS	By MS/MS	By MS/MS	By MS/MS	368110000	382470000	291700000	205360000	252290000	278890000	487270000	362720000
O15162	O15162	3	3	3	Phospholipid scramblase 1	PLSCR1	1	12.6	12.6	12.6	35.049	318	0	12.514	By MS/MS	By MS/MS	By MS/MS	By MS/MS	By MS/MS	By MS/MS	By MS/MS	By MS/MS	55015000	58884000		42671000	110490000	167650000	121980000	128070000
O15212	O15212	8	8	8	Prefoldin subunit 6	PFDN6	1	57.4	57.4	57.4	14.582	129	0	145.45	By MS/MS	By MS/MS	By MS/MS	By MS/MS	By MS/MS	By MS/MS	By MS/MS	By MS/MS	820400000	952450000	938410000	749350000	739120000	865440000	871670000	913150000
O15213	O15213	7	7	7	WD repeat-containing protein 46	WDR46	1	18	18	18	68.07	610	0	50.822	By MS/MS	By MS/MS	By MS/MS	By MS/MS	By MS/MS	By MS/MS	By MS/MS	By MS/MS	101820000	116740000	65007000	85237000	98888000	53016000	105410000	83501000
O15226	O15226	17	17	17	NF-kappa-B-repressing factor	NKRF	1	30.3	30.3	30.3	77.672	690	0	48.175	By MS/MS	By MS/MS	By MS/MS	By MS/MS	By MS/MS	By MS/MS	By MS/MS	By MS/MS	420090000	518580000	324870000	271240000	265590000	311880000	268440000	333370000
O15230	O15230	4	4	4	Laminin subunit alpha-5	LAMA5	1	2.2	2.2	2.2	399.73	3695	0	9.0983	By MS/MS	By MS/MS	By MS/MS	By matching					53695000	33147000	14723000	13889000
O15254	O15254	3	3	3	Peroxisomal acyl-coenzyme A oxidase 3	ACOX3	1	6.1	6.1	6.1	77.628	700	0.00028058	4.5036	By MS/MS	By matching	By matching	By matching	By MS/MS				10677000	34471000	19373000	17086000	32425000
O15258	O15258	5	5	5	Protein RER1	RER1	1	33.7	33.7	33.7	22.958	196	0	53.281	By MS/MS	By MS/MS	By MS/MS	By MS/MS	By MS/MS	By MS/MS	By MS/MS	By MS/MS	465330000	570850000	506180000	383150000	336240000	271780000	286780000	452290000
O15260	O15260	5	5	5	Surfeit locus protein 4	SURF4	1	24.2	24.2	24.2	30.394	269	0	35.444	By MS/MS	By MS/MS	By MS/MS	By MS/MS	By MS/MS	By MS/MS	By MS/MS	By MS/MS	718000000	1168900000	965390000	836780000	943360000	856530000	653230000	840030000
O15269	O15269	7	7	7	Serine palmitoyltransferase 1	SPTLC1	1	20.5	20.5	20.5	52.743	473	0	26.803	By MS/MS	By MS/MS	By MS/MS	By MS/MS	By MS/MS	By MS/MS	By MS/MS	By MS/MS	204020000	226500000	163710000	152860000	107820000	123000000	153900000	151900000
O15270	O15270	5	5	5	Serine palmitoyltransferase 2	SPTLC2	1	12.6	12.6	12.6	62.924	562	0	10.752	By MS/MS	By MS/MS	By MS/MS	By MS/MS	By MS/MS	By MS/MS	By MS/MS	By MS/MS	24252000	84188000	23429000	22733000	18494000		29869000	37210000
O15294	O15294	16	16	16	UDP-N-acetylglucosamine--peptide N-acetylglucosaminyltransferase 110 kDa subunit	OGT	1	20.3	20.3	20.3	116.92	1046	0	45.913	By MS/MS	By MS/MS	By MS/MS	By MS/MS	By MS/MS	By MS/MS	By MS/MS	By MS/MS	386980000	392780000	359180000	310420000	202580000	201770000	267340000	203630000
O15305	O15305	7	7	7	Phosphomannomutase 2	PMM2	1	31.7	31.7	31.7	28.082	246	0	33.881	By MS/MS	By MS/MS	By MS/MS	By MS/MS	By MS/MS	By MS/MS	By MS/MS	By MS/MS	264020000	335420000	295760000	201160000	276740000	252800000	332280000	329320000
O15320;Q96PC5;Q96RT6;Q8IX94;Q86UF2;P0CG41;A4FU28;A4D2H0	O15320;Q96PC5	5;5;1;1;1;1;1;1	5;5;1;1;1;1;1;1	5;5;1;1;1;1;1;1	cTAGE family member 5;Melanoma inhibitory activity protein 2	CTAGE5;MIA2	8	9.8	9.8	9.8	90.995	804	0	16.412	By MS/MS					By MS/MS	By MS/MS	By MS/MS	69771000					21030000	37197000	18535000
O15327	O15327	2	2	2	Type II inositol 3,4-bisphosphate 4-phosphatase	INPP4B	1	2.8	2.8	2.8	104.74	924	0.00030731	6.4632	By MS/MS	By MS/MS	By MS/MS	By matching	By matching	By MS/MS	By matching	By MS/MS	28798000	29486000	23658000	19599000	9289700	17084000	11713000	11377000
O15344	O15344	2	2	2	E3 ubiquitin-protein ligase Midline-1	MID1	1	3.9	3.9	3.9	75.25	667	0.00030469	6.2756	By matching	By matching	By MS/MS	By MS/MS	By matching			By matching	26139000	29629000	18702000	21903000	12521000			5582400
O15347	O15347	6	6	6	High mobility group protein B3	HMGB3	1	32	32	32	22.98	200	0	20.011	By MS/MS	By MS/MS	By MS/MS	By MS/MS	By MS/MS	By MS/MS	By MS/MS	By MS/MS	390010000	453410000	386300000	296210000	275750000	276930000	293930000	304560000
O15355	O15355	23	23	23	Protein phosphatase 1G	PPM1G	1	56.2	56.2	56.2	59.271	546	0	279.69	By MS/MS	By MS/MS	By MS/MS	By MS/MS	By MS/MS	By MS/MS	By MS/MS	By MS/MS	2815300000	3499900000	2809500000	2133000000	2497800000	2431700000	2421900000	2720200000
O15371	O15371	25	25	25	Eukaryotic translation initiation factor 3 subunit D	EIF3D	1	57.5	57.5	57.5	63.972	548	0	323.31	By MS/MS	By MS/MS	By MS/MS	By MS/MS	By MS/MS	By MS/MS	By MS/MS	By MS/MS	2901700000	3001000000	2425700000	1916700000	2554600000	1998700000	3003000000	2824300000
O15372	O15372	19	19	19	Eukaryotic translation initiation factor 3 subunit H	EIF3H	1	73	73	73	39.93	352	0	232.64	By MS/MS	By MS/MS	By MS/MS	By MS/MS	By MS/MS	By MS/MS	By MS/MS	By MS/MS	2293400000	2832600000	2055600000	1962400000	2222900000	2183700000	2686700000	2338200000
O15381	O15381	4	4	4	Nuclear valosin-containing protein-like	NVL	1	6.2	6.2	6.2	95.05	856	0	10.179	By MS/MS	By MS/MS	By MS/MS	By matching	By MS/MS	By MS/MS	By MS/MS	By matching	49021000	59268000	21417000	30300000	54756000	35638000	35129000	32638000
O15382	O15382	6	6	6	Branched-chain-amino-acid aminotransferase, mitochondrial	BCAT2	1	26.8	26.8	26.8	44.287	392	0	22.117	By MS/MS	By MS/MS	By MS/MS	By MS/MS	By MS/MS	By MS/MS	By MS/MS	By MS/MS	208100000	200610000	173710000	138310000	125900000	129700000	179270000	160550000
O15397	O15397	11	10	10	Importin-8	IPO8	1	10.4	9.5	9.5	119.94	1037	0	32.895	By MS/MS	By MS/MS	By MS/MS	By MS/MS	By MS/MS	By MS/MS	By MS/MS	By MS/MS	180190000	235200000	111690000	157240000	87883000	69961000	124120000	100770000
O15400	O15400	3	3	3	Syntaxin-7	STX7	1	14.6	14.6	14.6	29.815	261	0	11.143	By matching	By matching	By MS/MS	By MS/MS	By MS/MS	By MS/MS	By MS/MS	By MS/MS	86172000	64983000	73061000	45005000	71191000	87039000	83595000	73819000
O15439	O15439	2	2	2	Multidrug resistance-associated protein 4	ABCC4	1	2	2	2	149.52	1325	0.0037074	2.4402			By MS/MS		By matching		By matching	By MS/MS			5183200		2668400		13468000	5737900
O15446	O15446	5	5	5	DNA-directed RNA polymerase I subunit RPA34	CD3EAP	1	24.5	24.5	24.5	54.985	510	0	30.083	By MS/MS	By MS/MS	By MS/MS	By MS/MS	By MS/MS	By MS/MS	By MS/MS	By MS/MS	133450000	150820000	22691000	94957000	155350000	192540000	247540000	180010000
O15460	O15460	2	2	2	Prolyl 4-hydroxylase subunit alpha-2	P4HA2	1	4.3	4.3	4.3	60.901	535	0.0002805	4.5		By MS/MS	By MS/MS	By MS/MS	By matching					26078000	31797000		12568000
O15498	O15498	7	7	7	Synaptobrevin homolog YKT6	YKT6	1	43.4	43.4	43.4	22.417	198	0	40.641	By MS/MS	By MS/MS	By MS/MS	By MS/MS	By MS/MS	By MS/MS	By MS/MS	By MS/MS	410760000	385450000	428560000	314310000	372920000	316540000	425260000	424300000
O15511	O15511	4	4	4	Actin-related protein 2/3 complex subunit 5	ARPC5	1	52.3	52.3	52.3	16.32	151	0	89.041	By MS/MS	By MS/MS	By MS/MS	By MS/MS	By MS/MS	By MS/MS	By MS/MS	By MS/MS	524690000	680440000	472630000	472210000	292930000	377790000	378260000	344570000
O15533	O15533	6	6	6	Tapasin	TAPBP	1	23.4	23.4	23.4	47.625	448	0	14.93	By matching	By MS/MS	By MS/MS		By MS/MS	By MS/MS	By MS/MS	By MS/MS	6622800	104060000	30812000		570490000	353750000	403270000	540640000
O15541	O15541	3	3	3	RING finger protein 113A	RNF113A	1	14	14	14	38.787	343	0.00029464	5.5701	By matching	By MS/MS	By MS/MS	By matching	By MS/MS	By MS/MS	By matching	By MS/MS	15716000	35592000	36329000	28364000	20930000	63472000	59547000	55242000
O43143	O43143	40	40	39	Pre-mRNA-splicing factor ATP-dependent RNA helicase DHX15	DHX15	1	54.7	54.7	53.6	90.932	795	0	279.89	By MS/MS	By MS/MS	By MS/MS	By MS/MS	By MS/MS	By MS/MS	By MS/MS	By MS/MS	5256200000	5844600000	4681800000	4244900000	4710000000	4741600000	7268800000	4989900000
O43148	O43148	8	8	8	mRNA cap guanine-N7 methyltransferase	RNMT	1	27.1	27.1	27.1	54.843	476	0	23.704	By MS/MS	By MS/MS	By MS/MS	By MS/MS	By MS/MS	By MS/MS	By MS/MS	By MS/MS	145010000	157590000	226290000	152530000	110690000	127090000	162750000	163760000
O43156	O43156	8	8	8	TELO2-interacting protein 1 homolog	TTI1	1	9.3	9.3	9.3	122.07	1089	0	29.266	By MS/MS	By MS/MS	By MS/MS	By MS/MS	By MS/MS	By MS/MS	By MS/MS	By MS/MS	231360000	190250000	209160000	164000000	156250000	187820000	274340000	241740000
O43159	O43159	6	6	6	Ribosomal RNA-processing protein 8	RRP8	1	18.9	18.9	18.9	50.714	456	0	25.061	By MS/MS	By MS/MS	By MS/MS	By MS/MS	By MS/MS	By MS/MS	By MS/MS	By MS/MS	111840000	99787000	105180000	80518000	114710000	98182000	71165000	134350000
O43169	O43169	6	6	6	Cytochrome b5 type B	CYB5B	1	58.2	58.2	58.2	16.332	146	0	56.125	By MS/MS	By MS/MS	By MS/MS	By MS/MS	By MS/MS	By MS/MS	By MS/MS	By MS/MS	1025400000	1048800000	983380000	744190000	765110000	774690000	866810000	879380000
O43172	O43172	22	22	22	U4/U6 small nuclear ribonucleoprotein Prp4	PRPF4	1	58	58	58	58.449	522	0	89.267	By MS/MS	By MS/MS	By MS/MS	By MS/MS	By MS/MS	By MS/MS	By MS/MS	By MS/MS	1048700000	1071400000	833410000	795650000	709020000	716650000	789570000	653300000
O43175	O43175	25	25	25	D-3-phosphoglycerate dehydrogenase	PHGDH	1	54	54	54	56.65	533	0	272.53	By MS/MS	By MS/MS	By MS/MS	By MS/MS	By MS/MS	By MS/MS	By MS/MS	By MS/MS	6076700000	7122600000	5646400000	4782400000	4334500000	4322800000	5931200000	5357000000
O43237	O43237	7	6	6	Cytoplasmic dynein 1 light intermediate chain 2	DYNC1LI2	1	18.1	15.4	15.4	54.099	492	0	17.922	By MS/MS	By MS/MS	By MS/MS	By MS/MS	By MS/MS	By MS/MS	By MS/MS	By MS/MS	74608000	150900000	110620000	140680000	121660000	120070000	80991000	102290000
O43242	O43242	33	33	33	26S proteasome non-ATPase regulatory subunit 3	PSMD3	1	60.5	60.5	60.5	60.977	534	0	175.62	By MS/MS	By MS/MS	By MS/MS	By MS/MS	By MS/MS	By MS/MS	By MS/MS	By MS/MS	3338100000	3768700000	3069400000	2970200000	3241800000	3006400000	3879000000	3714600000
O43251;Q9NWB1;A6NFN3	O43251;Q9NWB1;A6NFN3	2;2;1	2;2;1	2;2;1	RNA binding protein fox-1 homolog 2;RNA binding protein fox-1 homolog 1;RNA binding protein fox-1 homolog 3	RBFOX2;RBFOX1;RBFOX3	3	6.4	6.4	6.4	41.373	390	0.00030021	5.9718	By MS/MS	By MS/MS	By MS/MS	By MS/MS	By MS/MS	By MS/MS	By MS/MS	By MS/MS	48065000	84607000	49691000	55500000	43925000	37135000	69742000	35825000
O43252	O43252	9	9	8	Bifunctional 3-phosphoadenosine 5-phosphosulfate synthase 1;Sulfate adenylyltransferase;Adenylyl-sulfate kinase	PAPSS1	1	20	20	17.8	70.832	624	0	27.065	By MS/MS	By MS/MS	By MS/MS	By MS/MS	By MS/MS	By MS/MS	By MS/MS	By MS/MS	293780000	680960000	336830000	436000000	345960000	353900000	271640000	291160000
O43264	O43264	10	10	10	Centromere/kinetochore protein zw10 homolog	ZW10	1	18.5	18.5	18.5	88.828	779	0	32.57	By MS/MS	By MS/MS	By MS/MS	By MS/MS	By MS/MS	By MS/MS	By MS/MS	By MS/MS	186900000	351130000	277030000	245950000	208070000	198490000	117850000	171210000
O43290	O43290	18	18	18	U4/U6.U5 tri-snRNP-associated protein 1	SART1	1	34.5	34.5	34.5	90.254	800	0	67.72	By MS/MS	By MS/MS	By MS/MS	By MS/MS	By MS/MS	By MS/MS	By MS/MS	By MS/MS	692200000	699940000	489040000	505360000	532590000	545510000	491300000	576530000
O43324	O43324	9	9	9	Eukaryotic translation elongation factor 1 epsilon-1	EEF1E1	1	56.3	56.3	56.3	19.81	174	0	39.073	By MS/MS	By MS/MS	By MS/MS	By MS/MS	By MS/MS	By MS/MS	By MS/MS	By MS/MS	404410000	472560000	528770000	287820000	184870000	177360000	229480000	303040000
O43390	O43390	29	22	22	Heterogeneous nuclear ribonucleoprotein R	HNRNPR	1	47.9	37.3	37.3	70.942	633	0	274.53	By MS/MS	By MS/MS	By MS/MS	By MS/MS	By MS/MS	By MS/MS	By MS/MS	By MS/MS	4494700000	5396200000	4363100000	3613600000	4310000000	4650000000	5262800000	4554200000
O43395	O43395	16	16	16	U4/U6 small nuclear ribonucleoprotein Prp3	PRPF3	1	26.5	26.5	26.5	77.528	683	0	48.775	By MS/MS	By MS/MS	By MS/MS	By MS/MS	By MS/MS	By MS/MS	By MS/MS	By MS/MS	461040000	731050000	478790000	382300000	434880000	348620000	710100000	401720000
O43396	O43396	16	16	16	Thioredoxin-like protein 1	TXNL1	1	64.7	64.7	64.7	32.251	289	0	199.19	By MS/MS	By MS/MS	By MS/MS	By MS/MS	By MS/MS	By MS/MS	By MS/MS	By MS/MS	1241700000	1316900000	1167800000	870050000	829870000	1092600000	1321800000	1080700000
O43399	O43399	12	12	12	Tumor protein D54	TPD52L2	1	76.2	76.2	76.2	22.237	206	0	237.39	By MS/MS	By MS/MS	By MS/MS	By MS/MS	By MS/MS	By MS/MS	By MS/MS	By MS/MS	3249700000	4680600000	2623900000	2566800000	4614900000	4488200000	5461800000	3320500000
O43402	O43402	5	5	5	ER membrane protein complex subunit 8	EMC8	1	39.5	39.5	39.5	23.773	210	0	17.095	By MS/MS	By MS/MS	By MS/MS	By MS/MS	By MS/MS	By MS/MS	By MS/MS	By MS/MS	36460000	66349000	57434000	53388000	67535000	48185000	57561000	55580000
O43414	O43414	2	2	2	ERI1 exoribonuclease 3	ERI3	1	8.6	8.6	8.6	37.238	337	0.00029308	5.4809	By matching	By matching	By MS/MS	By MS/MS	By MS/MS	By MS/MS	By matching	By MS/MS	18530000	36758000	38776000	39154000	42045000	58933000	28123000	57429000
O43432	O43432	13	6	6	Eukaryotic translation initiation factor 4 gamma 3	EIF4G3	1	9.7	5.8	5.8	176.65	1585	0	16.425	By MS/MS	By MS/MS	By MS/MS	By MS/MS	By MS/MS	By matching	By MS/MS	By MS/MS	141190000	147120000	143790000	93594000	176230000	42135000	109390000	97400000
O43447	O43447	9	9	9	Peptidyl-prolyl cis-trans isomerase H	PPIH	1	39.5	39.5	39.5	19.208	177	0	14.595	By MS/MS	By MS/MS	By MS/MS	By MS/MS	By MS/MS	By MS/MS	By MS/MS	By MS/MS	314850000	532550000	442140000	366930000	399200000	434470000	465930000	456860000
O43488;Q8NHP1;O95154	O43488	10;2;1	10;2;1	10;2;1	Aflatoxin B1 aldehyde reductase member 2	AKR7A2	3	36.2	36.2	36.2	39.589	359	0	36.539	By MS/MS	By MS/MS	By MS/MS	By MS/MS	By MS/MS	By MS/MS	By MS/MS	By MS/MS	483810000	449870000	451140000	390530000	453580000	366990000	345700000	368680000
O43491;Q9Y2J2	O43491	29;2	29;2	28;1	Band 4.1-like protein 2	EPB41L2	2	39.3	39.3	38.1	112.59	1005	0	114.05	By MS/MS	By MS/MS	By MS/MS	By MS/MS	By MS/MS	By MS/MS	By MS/MS	By MS/MS	923790000	1057100000	738290000	638670000	843370000	726590000	784850000	810000000
O43493	O43493	5	5	5	Trans-Golgi network integral membrane protein 2	TGOLN2	1	12.9	12.9	12.9	51.112	480	0	36.525	By MS/MS	By MS/MS	By MS/MS	By MS/MS	By MS/MS	By MS/MS	By MS/MS	By MS/MS	131180000	142750000	137320000	93793000	77980000	52293000	54357000	88063000
O43502	O43502	2	2	2	DNA repair protein RAD51 homolog 3	RAD51C	1	9	9	9	42.189	376	0.007619	1.9678			By matching	By MS/MS	By MS/MS	By MS/MS		By matching			17310000	7194700	4839200	13682000		8525100
O43583	O43583	9	9	9	Density-regulated protein	DENR	1	52.5	52.5	52.5	22.092	198	0	77.362	By MS/MS	By MS/MS	By MS/MS	By MS/MS	By MS/MS	By MS/MS	By MS/MS	By MS/MS	719010000	956810000	590630000	465000000	650680000	696030000	547660000	666570000
O43592	O43592	24	24	24	Exportin-T	XPOT	1	32.6	32.6	32.6	109.96	962	0	112.58	By MS/MS	By MS/MS	By MS/MS	By MS/MS	By MS/MS	By MS/MS	By MS/MS	By MS/MS	1106900000	1451400000	1134500000	939060000	951880000	1009400000	864460000	1036100000
O43598	O43598	4	4	4	2-deoxynucleoside 5-phosphate N-hydrolase 1	DNPH1	1	21.3	21.3	21.3	19.108	174	0	10.976	By MS/MS	By MS/MS	By MS/MS	By MS/MS	By MS/MS	By MS/MS	By MS/MS	By MS/MS	160040000	162470000	138470000	146140000	119970000	142300000	144120000	116010000
O43615	O43615	18	18	18	Mitochondrial import inner membrane translocase subunit TIM44	TIMM44	1	37.6	37.6	37.6	51.355	452	0	80.973	By MS/MS	By MS/MS	By MS/MS	By MS/MS	By MS/MS	By MS/MS	By MS/MS	By MS/MS	659590000	755480000	582200000	529550000	623030000	513810000	719290000	758050000
O43617	O43617	3	3	3	Trafficking protein particle complex subunit 3	TRAPPC3	1	20	20	20	20.274	180	0.00031898	7.4943	By MS/MS	By MS/MS	By MS/MS	By MS/MS	By MS/MS	By MS/MS	By MS/MS	By MS/MS	110580000	116880000	79489000	31981000	58983000	46980000	52740000	32639000
O43633	O43633	7	7	7	Charged multivesicular body protein 2a	CHMP2A	1	28.4	28.4	28.4	25.104	222	0	17.603	By MS/MS	By MS/MS	By MS/MS	By MS/MS	By MS/MS	By MS/MS	By MS/MS	By MS/MS	620490000	548870000	534850000	464520000	330260000	342210000	389510000	480150000
O43660	O43660	15	15	15	Pleiotropic regulator 1	PLRG1	1	49.8	49.8	49.8	57.193	514	0	86.386	By MS/MS	By MS/MS	By MS/MS	By MS/MS	By MS/MS	By MS/MS	By MS/MS	By MS/MS	604740000	784260000	645150000	425790000	498440000	468500000	511200000	563380000
O43663	O43663	3	3	3	Protein regulator of cytokinesis 1	PRC1	1	7.3	7.3	7.3	71.606	620	0	21.348	By MS/MS	By MS/MS	By MS/MS	By MS/MS			By matching		35407000	32135000	34485000	27927000			2444300
O43665	O43665	3	3	3	Regulator of G-protein signaling 10	RGS10	1	26	26	26	20.236	173	0	15.601	By matching	By MS/MS	By MS/MS	By MS/MS	By MS/MS	By MS/MS	By MS/MS	By MS/MS	13899000	72055000	29073000	25962000	20820000	34318000	19960000	45779000
O43670	O43670	9	9	9	BUB3-interacting and GLEBS motif-containing protein ZNF207	ZNF207	1	20.3	20.3	20.3	50.75	478	0	83.248	By MS/MS	By MS/MS	By MS/MS	By MS/MS	By MS/MS	By MS/MS	By MS/MS	By MS/MS	684540000	827000000	618660000	555310000	765400000	745640000	739450000	800360000
O43674	O43674	3	3	3	NADH dehydrogenase [ubiquinone] 1 beta subcomplex subunit 5, mitochondrial	NDUFB5	1	23.3	23.3	23.3	21.75	189	0	12.78	By MS/MS	By MS/MS	By MS/MS	By MS/MS	By MS/MS	By MS/MS	By MS/MS	By MS/MS	116740000	143210000	112710000	93150000	104670000	58140000	106300000	117280000
O43676	O43676	2	2	2	NADH dehydrogenase [ubiquinone] 1 beta subcomplex subunit 3	NDUFB3	1	19.4	19.4	19.4	11.402	98	0.00027801	4.3275	By MS/MS	By MS/MS	By MS/MS	By MS/MS	By MS/MS	By MS/MS	By matching	By MS/MS	47776000	60589000	49730000	52519000	29391000	36179000	34696000	35373000
O43678	O43678	2	2	2	NADH dehydrogenase [ubiquinone] 1 alpha subcomplex subunit 2	NDUFA2	1	31.3	31.3	31.3	10.921	99	0.0034809	2.5093	By matching	By matching	By MS/MS	By matching	By matching	By MS/MS	By MS/MS	By matching	20233000	20984000	53771000	16735000	17338000	18485000	43637000	14873000
O43681	O43681	10	10	10	ATPase ASNA1	ASNA1	1	38.2	38.2	38.2	38.792	348	0	43.563	By MS/MS	By MS/MS	By MS/MS	By MS/MS	By MS/MS	By MS/MS	By MS/MS	By MS/MS	615040000	688990000	538780000	451010000	552540000	489390000	722500000	599440000
O43684	O43684	13	13	13	Mitotic checkpoint protein BUB3	BUB3	1	49.4	49.4	49.4	37.154	328	0	102.53	By MS/MS	By MS/MS	By MS/MS	By MS/MS	By MS/MS	By MS/MS	By MS/MS	By MS/MS	1376900000	1662500000	1177900000	1098400000	1206900000	1170600000	1424400000	1463200000
O43688	O43688	2	2	2	Lipid phosphate phosphohydrolase 2	PPAP2C	1	8.7	8.7	8.7	32.573	288	0.0018027	2.9886	By matching	By MS/MS	By MS/MS	By matching	By MS/MS	By matching	By MS/MS	By MS/MS	112690000	94907000	94843000	53434000	63571000	32992000	53941000	41295000
O43707	O43707	74	74	49	Alpha-actinin-4	ACTN4	1	79.8	79.8	58.3	104.85	911	0	323.31	By MS/MS	By MS/MS	By MS/MS	By MS/MS	By MS/MS	By MS/MS	By MS/MS	By MS/MS	47072000000	49665000000	40034000000	33887000000	34610000000	35859000000	41594000000	39729000000
O43719	O43719	4	4	4	HIV Tat-specific factor 1	HTATSF1	1	7.5	7.5	7.5	85.852	755	0	24.602	By MS/MS	By MS/MS	By MS/MS	By MS/MS	By MS/MS	By MS/MS	By MS/MS	By MS/MS	76713000	63979000	68201000	67940000	18507000	27275000	76206000	30566000
O43747	O43747	22	22	22	AP-1 complex subunit gamma-1	AP1G1	1	36.4	36.4	36.4	91.35	822	0	106.77	By MS/MS	By MS/MS	By MS/MS	By MS/MS	By MS/MS	By MS/MS	By MS/MS	By MS/MS	1003400000	972890000	681500000	702710000	721360000	733970000	970000000	1053500000
O43765	O43765	9	9	9	Small glutamine-rich tetratricopeptide repeat-containing protein alpha	SGTA	1	35.1	35.1	35.1	34.063	313	0	54.478	By MS/MS	By MS/MS	By MS/MS	By MS/MS	By MS/MS	By MS/MS	By MS/MS	By MS/MS	598100000	671440000	745450000	591140000	866630000	839230000	792200000	693840000
O43768	O43768	8	8	7	Alpha-endosulfine	ENSA	1	74.4	74.4	65.3	13.389	121	0	138.85	By MS/MS	By MS/MS	By MS/MS	By MS/MS	By MS/MS	By MS/MS	By MS/MS	By MS/MS	464240000	521610000	349650000	369670000	361760000	345200000	298600000	378930000
O43772	O43772	3	3	3	Mitochondrial carnitine/acylcarnitine carrier protein	SLC25A20	1	8.6	8.6	8.6	32.943	301	0.0018135	3.0795	By MS/MS	By MS/MS	By MS/MS	By matching	By MS/MS		By matching	By MS/MS	42738000	53482000	25827000	20505000	26900000		22460000
O43776;REV__H7BZ55	O43776	30;1	30;1	30;1	Asparagine--tRNA ligase, cytoplasmic	NARS	2	54.2	54.2	54.2	62.942	548	0	234.89	By MS/MS	By MS/MS	By MS/MS	By MS/MS	By MS/MS	By MS/MS	By MS/MS	By MS/MS	3281200000	3918700000	3174600000	2487400000	2971500000	2661900000	3382900000	3048000000
O43795;Q9UBC5	O43795	11;1	11;1	11;1	Unconventional myosin-Ib	MYO1B	2	14.3	14.3	14.3	131.98	1136	0	27.539	By MS/MS	By MS/MS	By MS/MS	By MS/MS	By MS/MS	By MS/MS	By MS/MS	By MS/MS	251060000	301710000	201490000	111240000	192900000	214090000	295470000	239300000
O43809	O43809	15	15	15	Cleavage and polyadenylation specificity factor subunit 5	NUDT21	1	78.4	78.4	78.4	26.227	227	0	73.182	By MS/MS	By MS/MS	By MS/MS	By MS/MS	By MS/MS	By MS/MS	By MS/MS	By MS/MS	2171400000	1912300000	1518300000	1338800000	1401200000	1326500000	2352900000	1726300000
O43813	O43813	2	2	2	LanC-like protein 1	LANCL1	1	8.3	8.3	8.3	45.283	399	0.00030012	5.9614	By MS/MS	By MS/MS	By MS/MS	By MS/MS	By MS/MS	By MS/MS	By MS/MS	By MS/MS	48811000	48863000	40230000	37618000	41575000	48007000	38381000	41080000
O43815	O43815	9	9	8	Striatin	STRN	1	17.4	17.4	16.5	86.131	780	0	23.314	By MS/MS	By MS/MS	By MS/MS	By matching	By MS/MS	By MS/MS	By MS/MS	By MS/MS	148470000	210130000	185740000	68988000	148870000	143290000	144340000	120800000
O43818	O43818	16	16	16	U3 small nucleolar RNA-interacting protein 2	RRP9	1	48.4	48.4	48.4	51.84	475	0	165.85	By MS/MS	By MS/MS	By MS/MS	By MS/MS	By MS/MS	By MS/MS	By MS/MS	By MS/MS	1117200000	1117700000	861290000	903990000	781630000	896270000	845280000	842930000
O43819	O43819	3	3	3	Protein SCO2 homolog, mitochondrial	SCO2	1	13.5	13.5	13.5	29.81	266	0	12.194	By MS/MS	By MS/MS	By MS/MS	By MS/MS	By MS/MS	By MS/MS	By MS/MS	By MS/MS	26886000	30921000	48544000	49635000	44170000	35826000	43921000	58629000
O43823	O43823	11	11	11	A-kinase anchor protein 8	AKAP8	1	26.9	26.9	26.9	76.107	692	0	47.041	By MS/MS	By MS/MS	By MS/MS	By MS/MS	By MS/MS	By MS/MS	By MS/MS	By MS/MS	155460000	231890000	131810000	82200000	153530000	230970000	215170000	173730000
O43837	O43837	14	14	14	Isocitrate dehydrogenase [NAD] subunit beta, mitochondrial	IDH3B	1	44.4	44.4	44.4	42.183	385	0	61.195	By MS/MS	By MS/MS	By MS/MS	By MS/MS	By MS/MS	By MS/MS	By MS/MS	By MS/MS	484780000	664920000	484620000	352930000	484550000	447360000	602080000	554770000
O43847	O43847	21	21	21	Nardilysin	NRD1	1	22.1	22.1	22.1	131.57	1150	0	51.743	By MS/MS	By MS/MS	By MS/MS	By MS/MS	By MS/MS	By MS/MS	By MS/MS	By MS/MS	651220000	595990000	683670000	628980000	380990000	449380000	369220000	430580000
O43852	O43852	17	17	17	Calumenin	CALU	1	54	54	54	37.106	315	0	169.19	By MS/MS	By MS/MS	By MS/MS	By MS/MS	By MS/MS	By MS/MS	By MS/MS	By MS/MS	3144500000	4261000000	3403300000	2030500000	2279500000	1918900000	2559300000	2638200000
O43865;Q96HN2	O43865;Q96HN2	11;6	11;6	11;6	Putative adenosylhomocysteinase 2;Putative adenosylhomocysteinase 3	AHCYL1;AHCYL2	2	29.6	29.6	29.6	58.951	530	0	32.036	By MS/MS	By MS/MS	By MS/MS	By MS/MS	By MS/MS	By MS/MS	By MS/MS	By MS/MS	433560000	489320000	434420000	266360000	129040000	120960000	135870000	108730000
O43920	O43920	5	5	5	NADH dehydrogenase [ubiquinone] iron-sulfur protein 5	NDUFS5	1	56.6	56.6	56.6	12.517	106	0.00032971	8.4086	By MS/MS	By MS/MS	By MS/MS	By MS/MS	By MS/MS	By MS/MS	By MS/MS	By MS/MS	183400000	234450000	176280000	102000000	158780000	83648000	129180000	99832000
O60216;Q9H4I0	O60216	8;2	8;2	8;2	Double-strand-break repair protein rad21 homolog	RAD21	2	18.9	18.9	18.9	71.689	631	0	15.881	By MS/MS	By MS/MS	By MS/MS	By MS/MS	By MS/MS	By MS/MS	By MS/MS	By MS/MS	69222000	134850000	146890000	110010000	107560000	128490000	69076000	103910000
O60220	O60220	5	5	5	Mitochondrial import inner membrane translocase subunit Tim8 A	TIMM8A	1	79.4	79.4	79.4	10.998	97	0	47.361	By MS/MS	By MS/MS	By MS/MS	By MS/MS	By MS/MS	By MS/MS	By MS/MS	By MS/MS	240200000	257010000	221840000	160860000	153140000	288580000	263660000	264850000
O60231	O60231	12	11	11	Putative pre-mRNA-splicing factor ATP-dependent RNA helicase DHX16	DHX16	1	13.6	12.8	12.8	119.26	1041	0	37.278	By MS/MS	By MS/MS	By MS/MS	By MS/MS	By MS/MS	By MS/MS	By MS/MS	By MS/MS	164080000	189930000	140430000	120100000	97196000	107310000	214240000	156600000
O60232	O60232	9	9	9	Sjoegren syndrome/scleroderma autoantigen 1	SSSCA1	1	66.8	66.8	66.8	21.474	199	0	163.42	By MS/MS	By MS/MS	By MS/MS	By MS/MS	By MS/MS	By MS/MS	By MS/MS	By MS/MS	1084300000	937650000	733120000	484500000	682190000	607290000	710750000	785870000
O60244	O60244	3	3	3	Mediator of RNA polymerase II transcription subunit 14	MED14	1	4.1	4.1	4.1	160.6	1454	0.0039273	2.3637	By MS/MS	By MS/MS	By matching	By MS/MS	By matching	By matching	By matching	By matching	131210000	113110000	102340000	20297000	83750000	66472000	21237000	46562000
O60256	O60256	7	7	7	Phosphoribosyl pyrophosphate synthase-associated protein 2	PRPSAP2	1	25.7	25.7	25.7	40.925	369	0	15.962	By MS/MS	By MS/MS	By MS/MS	By MS/MS	By MS/MS	By MS/MS	By MS/MS	By MS/MS	206400000	254220000	153590000	185290000	119270000	127010000	136150000	171680000
O60264	O60264	39	39	28	SWI/SNF-related matrix-associated actin-dependent regulator of chromatin subfamily A member 5	SMARCA5	1	39.5	39.5	30.2	121.9	1052	0	178.61	By MS/MS	By MS/MS	By MS/MS	By MS/MS	By MS/MS	By MS/MS	By MS/MS	By MS/MS	1321000000	1550400000	1193100000	1130400000	1145400000	1262500000	1391000000	1378600000
O60271	O60271	21	21	18	C-Jun-amino-terminal kinase-interacting protein 4	SPAG9	1	24.6	24.6	22.6	146.2	1321	0	83.365	By MS/MS	By MS/MS	By MS/MS	By MS/MS	By MS/MS	By MS/MS	By MS/MS	By MS/MS	422020000	434550000	454800000	458760000	505210000	506320000	601580000	502290000
O60287	O60287	10	10	10	Nucleolar pre-ribosomal-associated protein 1	URB1	1	7.4	7.4	7.4	254.39	2271	0	15.051	By MS/MS	By MS/MS	By MS/MS	By MS/MS	By MS/MS	By MS/MS	By MS/MS	By MS/MS	181650000	106240000	72938000	61697000	83482000	107900000	100280000	136500000
O60294	O60294	4	4	4	tRNA wybutosine-synthesizing protein 4	LCMT2	1	6.4	6.4	6.4	75.601	686	0.00030432	6.2475	By MS/MS	By MS/MS	By MS/MS	By MS/MS	By MS/MS	By MS/MS	By MS/MS	By MS/MS	104270000	94519000	70387000		53148000	20179000	44432000	35221000
O60306	O60306	21	21	21	Intron-binding protein aquarius	AQR	1	19	19	19	171.29	1485	0	44.552	By MS/MS	By MS/MS	By MS/MS	By MS/MS	By MS/MS	By MS/MS	By MS/MS	By MS/MS	496360000	473680000	427630000	328620000	303790000	248560000	352000000	319430000
O60313	O60313	10	10	10	Dynamin-like 120 kDa protein, mitochondrial;Dynamin-like 120 kDa protein, form S1	OPA1	1	14.4	14.4	14.4	111.63	960	0	15.261	By MS/MS	By MS/MS	By MS/MS	By MS/MS	By MS/MS	By MS/MS	By matching	By MS/MS	122340000	134550000	128300000	85618000	75086000	12084000	39411000	73726000
O60333;O43896;Q12756	O60333;O43896;Q12756	2;1;1	2;1;1	2;1;1	Kinesin-like protein KIF1B;Kinesin-like protein KIF1C;Kinesin-like protein KIF1A	KIF1B;KIF1C;KIF1A	3	1.5	1.5	1.5	204.47	1816	0.00053163	3.5423	By matching	By matching	By MS/MS	By MS/MS	By matching	By matching	By MS/MS	By MS/MS	22360000	191300000	154540000	34989000	227430000	138620000	186690000	321070000
O60341	O60341	8	8	8	Lysine-specific histone demethylase 1A	KDM1A	1	15	15	15	92.902	852	0	15.792	By MS/MS	By MS/MS	By MS/MS	By MS/MS	By MS/MS	By MS/MS	By MS/MS	By MS/MS	138510000	113770000	137810000	158340000	84774000	126530000	173990000	106330000
O60343	O60343	7	7	7	TBC1 domain family member 4	TBC1D4	1	7.2	7.2	7.2	146.56	1298	0	13.472	By MS/MS	By MS/MS	By MS/MS	By MS/MS	By MS/MS	By MS/MS	By MS/MS	By matching	64849000	49590000	54534000	79290000	23195000	34414000	42253000	24679000
O60427	O60427	4	4	4	Fatty acid desaturase 1	FADS1	1	10.6	10.6	10.6	51.964	444	0.00032436	7.9017	By MS/MS	By MS/MS	By MS/MS	By MS/MS		By matching			82440000	83042000	57431000	42477000		7801500
O60488	O60488	13	11	11	Long-chain-fatty-acid--CoA ligase 4	ACSL4	1	25.6	21.5	21.5	79.187	711	0	31.171	By MS/MS	By MS/MS	By MS/MS	By MS/MS	By MS/MS	By MS/MS	By MS/MS	By MS/MS	337820000	352640000	291830000	225020000	153470000	116670000	151190000	169140000
O60493	O60493	10	10	8	Sorting nexin-3	SNX3	1	50	50	45.7	18.762	162	0	17.871	By MS/MS	By MS/MS	By MS/MS	By MS/MS	By MS/MS	By MS/MS	By MS/MS	By MS/MS	616900000	619840000	447860000	456850000	479650000	466230000	477470000	511030000
O60499	O60499	4	4	4	Syntaxin-10	STX10	1	24.1	24.1	24.1	28.114	249	0	21.562	By MS/MS	By MS/MS	By MS/MS	By MS/MS	By MS/MS	By matching	By matching	By MS/MS	41073000	67884000	65100000	61399000	41574000	57904000	22072000	43594000
O60502	O60502	17	17	17	Protein O-GlcNAcase	MGEA5	1	26.7	26.7	26.7	102.91	916	0	25.718	By MS/MS	By MS/MS	By MS/MS	By MS/MS	By MS/MS	By MS/MS	By MS/MS	By MS/MS	235470000	407630000	269130000	274270000	205250000	231570000	307990000	243510000
O60504	O60504	2	2	2	Vinexin	SORBS3	1	5.5	5.5	5.5	75.34	671	0.00028752	5.0896	By MS/MS	By MS/MS	By MS/MS	By MS/MS		By matching	By MS/MS		50213000	52234000	53543000	54274000		30669000	32077000
O60506	O60506	31	31	24	Heterogeneous nuclear ribonucleoprotein Q	SYNCRIP	1	55.1	55.1	44.3	69.602	623	0	323.31	By MS/MS	By MS/MS	By MS/MS	By MS/MS	By MS/MS	By MS/MS	By MS/MS	By MS/MS	9391400000	10339000000	8508200000	7594700000	9273600000	9681600000	11152000000	9936300000
O60508	O60508	4	4	4	Pre-mRNA-processing factor 17	CDC40	1	10	10	10	65.521	579	0.00033201	8.6878	By MS/MS	By MS/MS	By MS/MS	By matching	By matching	By matching	By MS/MS	By MS/MS	41695000	52865000	36246000	14004000	42530000	38739000	36458000	46168000
O60518	O60518	4	2	2	Ran-binding protein 6	RANBP6	1	4.7	3	3	124.71	1105	0	18.469	By MS/MS	By MS/MS	By MS/MS	By MS/MS	By MS/MS	By MS/MS	By matching	By MS/MS	15432000	15246000	8810100	12904000	7272500	7010900	3105700	6089000
O60524	O60524	4	4	4	Nuclear export mediator factor NEMF	NEMF	1	4.1	4.1	4.1	122.95	1076	0.0002862	4.9218	By MS/MS	By MS/MS	By MS/MS	By MS/MS			By matching		48650000	24954000	12088000				27706000
O60547	O60547	3	3	3	GDP-mannose 4,6 dehydratase	GMDS	1	10.2	10.2	10.2	41.949	372	0.00032103	7.6373	By MS/MS	By MS/MS	By MS/MS	By MS/MS	By MS/MS	By MS/MS	By MS/MS	By matching	35734000	50657000	15781000	43902000	11127000	32295000		24994000
O60563;O60583	O60563	6;1	6;1	6;1	Cyclin-T1	CCNT1	2	14.5	14.5	14.5	80.684	726	0	19.912	By MS/MS	By MS/MS	By MS/MS	By matching	By MS/MS	By MS/MS	By matching	By MS/MS	146070000	136180000	91292000	35387000	53315000	60019000	16600000	81219000
O60566	O60566	2	2	2	Mitotic checkpoint serine/threonine-protein kinase BUB1 beta	BUB1B	1	3	3	3	119.54	1050	0.0039245	2.3405	By MS/MS			By MS/MS					12133000			15649000
O60568	O60568	25	25	25	Procollagen-lysine,2-oxoglutarate 5-dioxygenase 3	PLOD3	1	44.2	44.2	44.2	84.784	738	0	102.91	By MS/MS	By MS/MS	By MS/MS	By MS/MS	By MS/MS	By MS/MS	By MS/MS	By MS/MS	1023000000	1306000000	1083000000	1030400000	858420000	1019800000	913630000	1074400000
O60573	O60573	4	4	4	Eukaryotic translation initiation factor 4E type 2	EIF4E2	1	15.5	15.5	15.5	28.362	245	0	12.209	By MS/MS	By MS/MS	By MS/MS	By MS/MS	By MS/MS	By MS/MS	By MS/MS	By MS/MS	62845000	43219000	49466000	18281000	12366000	31502000	86840000	59482000
O60610	O60610	36	36	36	Protein diaphanous homolog 1	DIAPH1	1	37.7	37.7	37.7	141.35	1272	0	188.1	By MS/MS	By MS/MS	By MS/MS	By MS/MS	By MS/MS	By MS/MS	By MS/MS	By MS/MS	2169200000	2273800000	1920100000	1793700000	1714400000	2203500000	2716200000	2365500000
O60664	O60664	19	19	19	Perilipin-3	PLIN3	1	62.2	62.2	62.2	47.074	434	0	281.38	By MS/MS	By MS/MS	By MS/MS	By MS/MS	By MS/MS	By MS/MS	By MS/MS	By MS/MS	2410000000	2635300000	1486200000	1634900000	1653900000	1959800000	2478600000	2011500000
O60678	O60678	4	4	4	Protein arginine N-methyltransferase 3	PRMT3	1	10.9	10.9	10.9	59.875	531	0	8.865	By MS/MS	By MS/MS	By MS/MS	By MS/MS	By MS/MS	By MS/MS	By MS/MS	By MS/MS	98795000	128560000	98857000	52035000	98529000	81673000	46422000	55597000
O60684;O15131	O60684	14;4	14;4	11;3	Importin subunit alpha-7	KPNA6	2	35.1	35.1	29.1	60.029	536	0	175.02	By MS/MS	By MS/MS	By MS/MS	By MS/MS	By MS/MS	By MS/MS	By MS/MS	By MS/MS	1071200000	1296000000	821270000	685770000	863100000	804270000	1128000000	710290000
O60701	O60701	15	15	15	UDP-glucose 6-dehydrogenase	UGDH	1	43.1	43.1	43.1	55.023	494	0	54.849	By MS/MS	By MS/MS	By MS/MS	By MS/MS	By MS/MS	By MS/MS	By MS/MS	By MS/MS	636470000	804510000	546830000	479630000	578770000	579940000	790760000	685480000
O60711	O60711	2	2	2	Leupaxin	LPXN	1	10.1	10.1	10.1	43.332	386	0.00028744	5.0877	By MS/MS	By MS/MS	By MS/MS	By MS/MS	By MS/MS	By MS/MS	By MS/MS	By MS/MS	84967000	56173000	66229000	55862000	75975000	87043000	91921000	73968000
O60716	O60716	19	19	19	Catenin delta-1	CTNND1	1	29.8	29.8	29.8	108.17	968	0	140.48	By MS/MS	By MS/MS	By MS/MS	By MS/MS	By MS/MS	By MS/MS	By MS/MS	By MS/MS	765730000	842860000	703130000	685400000	576860000	581620000	653130000	732460000
O60725	O60725	2	2	2	Protein-S-isoprenylcysteine O-methyltransferase	ICMT	1	9.5	9.5	9.5	31.938	284	0.00348	2.5084	By matching	By MS/MS	By matching	By matching	By MS/MS	By MS/MS	By MS/MS	By matching	30076000	40966000	15674000	49299000	26738000	15069000	23463000	35114000
O60749	O60749	14	14	12	Sorting nexin-2	SNX2	1	30.3	30.3	26.2	58.47	519	0	87.332	By MS/MS	By MS/MS	By MS/MS	By MS/MS	By MS/MS	By MS/MS	By MS/MS	By MS/MS	726900000	842590000	568500000	529970000	588900000	677500000	844920000	785030000
O60762	O60762	13	13	13	Dolichol-phosphate mannosyltransferase subunit 1	DPM1	1	48.1	48.1	48.1	29.634	260	0	72.315	By MS/MS	By MS/MS	By MS/MS	By MS/MS	By MS/MS	By MS/MS	By MS/MS	By MS/MS	639480000	740180000	549570000	523520000	508830000	421390000	396280000	858160000
O60763	O60763	25	25	24	General vesicular transport factor p115	USO1	1	36.2	36.2	35.4	107.89	962	0	160.43	By MS/MS	By MS/MS	By MS/MS	By MS/MS	By MS/MS	By MS/MS	By MS/MS	By MS/MS	915010000	1007800000	767120000	676200000	979190000	842910000	857320000	886090000
O60783	O60783	2	2	2	28S ribosomal protein S14, mitochondrial	MRPS14	1	21.9	21.9	21.9	15.139	128	0.00030497	6.3303	By MS/MS	By matching	By matching	By MS/MS	By MS/MS	By MS/MS	By MS/MS	By MS/MS	53810000	43978000	50350000	59123000	27506000	62196000	96754000	38447000
O60784	O60784	5	5	5	Target of Myb protein 1	TOM1	1	18.1	18.1	18.1	53.818	492	0.0003283	8.2885	By MS/MS	By MS/MS	By MS/MS	By MS/MS	By MS/MS	By MS/MS	By MS/MS	By MS/MS	24093000	75688000	83452000	42229000	56227000	57182000	39625000	40070000
O60826	O60826	5	5	5	Coiled-coil domain-containing protein 22	CCDC22	1	13.6	13.6	13.6	70.755	627	0.00030989	6.7313	By MS/MS	By MS/MS	By matching	By matching	By MS/MS	By matching	By MS/MS	By MS/MS	35206000	50960000	27584000	22980000	37526000	34460000	36846000	28888000
O60828	O60828	8	8	8	Polyglutamine-binding protein 1	PQBP1	1	41.1	41.1	41.1	30.472	265	0	56.187	By MS/MS	By MS/MS	By MS/MS	By MS/MS	By MS/MS	By MS/MS	By MS/MS	By MS/MS	346630000	496910000	477630000	265380000	354500000	406310000	488460000	452140000
O60831	O60831	3	3	3	PRA1 family protein 2	PRAF2	1	22.5	22.5	22.5	19.258	178	0	36.013	By MS/MS	By MS/MS	By MS/MS	By MS/MS	By MS/MS	By MS/MS	By MS/MS	By MS/MS	248370000	263100000	204700000	164130000	189210000	193070000	257240000	195810000
O60832	O60832	22	22	22	H/ACA ribonucleoprotein complex subunit 4	DKC1	1	53.7	53.7	53.7	57.673	514	0	159.81	By MS/MS	By MS/MS	By MS/MS	By MS/MS	By MS/MS	By MS/MS	By MS/MS	By MS/MS	1315900000	1276400000	1079600000	857760000	914630000	1175000000	1426700000	1440700000
O60841	O60841	31	31	31	Eukaryotic translation initiation factor 5B	EIF5B	1	31.9	31.9	31.9	138.83	1220	0	144.8	By MS/MS	By MS/MS	By MS/MS	By MS/MS	By MS/MS	By MS/MS	By MS/MS	By MS/MS	1651600000	2126400000	1660700000	1463000000	1456000000	1290100000	1778700000	1765100000
O60869	O60869	7	7	7	Endothelial differentiation-related factor 1	EDF1	1	48	48	48	16.368	148	0	22.258	By MS/MS	By MS/MS	By MS/MS	By MS/MS	By MS/MS	By MS/MS	By MS/MS	By MS/MS	750430000	665560000	546490000	467880000	416000000	601650000	327080000	649490000
O60884	O60884	18	18	18	DnaJ homolog subfamily A member 2	DNAJA2	1	44.7	44.7	44.7	45.745	412	0	128.7	By MS/MS	By MS/MS	By MS/MS	By MS/MS	By MS/MS	By MS/MS	By MS/MS	By MS/MS	1971900000	2036500000	2022900000	1970800000	1713100000	2029900000	2337600000	1902900000
O60885;Q58F21	O60885	9;1	9;1	6;0	Bromodomain-containing protein 4	BRD4	2	7.9	7.9	5.7	152.22	1362	0	18.523	By MS/MS	By MS/MS	By MS/MS	By MS/MS	By MS/MS	By MS/MS	By MS/MS	By MS/MS	190190000	475500000	376970000	333810000	118450000	158300000	274810000	138560000
O60888	O60888	3	3	3	Protein CutA	CUTA	1	30.7	30.7	30.7	19.116	179	0	24.839	By MS/MS	By MS/MS	By MS/MS	By MS/MS	By MS/MS	By MS/MS	By MS/MS	By MS/MS	298940000	366500000	342800000	276950000	216840000	252520000	347450000	271710000
O60907;Q9BQ87	O60907	9;4	4;1	4;1	F-box-like/WD repeat-containing protein TBL1X	TBL1X	2	27.6	16.3	16.3	62.495	577	0	15.02	By MS/MS	By MS/MS	By MS/MS	By MS/MS	By matching	By matching	By matching	By matching	39772000	76292000	49425000	43452000	21864000	37287000
O60925	O60925	6	6	6	Prefoldin subunit 1	PFDN1	1	57.4	57.4	57.4	14.21	122	0	24.374	By MS/MS	By MS/MS	By MS/MS	By MS/MS	By MS/MS	By MS/MS	By MS/MS	By MS/MS	646280000	734930000	650820000	492800000	459310000	616170000	475270000	613140000
O60934	O60934	2	2	2	Nibrin	NBN	1	5.3	5.3	5.3	84.958	754	0.00032123	7.6407		By MS/MS			By MS/MS	By matching				34236000			17408000	32673000
O75044	O75044	2	1	1	SLIT-ROBO Rho GTPase-activating protein 2	SRGAP2	1	2	0.8	0.8	120.88	1071	0.007831	1.9392		By matching	By MS/MS	By matching	By matching	By MS/MS		By MS/MS			9295600	7535500	10492000	7427700		14259000
O75083	O75083	31	31	31	WD repeat-containing protein 1	WDR1	1	68.3	68.3	68.3	66.193	606	0	323.31	By MS/MS	By MS/MS	By MS/MS	By MS/MS	By MS/MS	By MS/MS	By MS/MS	By MS/MS	5347800000	7004200000	5200400000	4466000000	6107200000	6764900000	7197000000	4988200000
O75116	O75116	28	28	22	Rho-associated protein kinase 2	ROCK2	1	30.1	30.1	25.3	160.9	1388	0	114.32	By MS/MS	By MS/MS	By MS/MS	By MS/MS	By MS/MS	By MS/MS	By MS/MS	By MS/MS	854670000	931230000	1377300000	607500000	567510000	616140000	1589700000	533150000
O75122	O75122	6	6	4	CLIP-associating protein 2	CLASP2	1	7	7	4.6	141.13	1294	0	20.247	By MS/MS	By MS/MS	By MS/MS	By MS/MS	By MS/MS	By MS/MS	By MS/MS	By MS/MS	36568000	58744000	51072000	44175000	40365000	34147000	54947000	47930000
O75131;Q96FN4;Q8IYJ1;Q96A23;O95741;Q9HCH3;Q9UBL6	O75131	20;1;1;1;1;1;1	20;1;1;1;1;1;1	19;0;0;0;0;0;0	Copine-3	CPNE3	7	41.7	41.7	40	60.13	537	0	138.05	By MS/MS	By MS/MS	By MS/MS	By MS/MS	By MS/MS	By MS/MS	By MS/MS	By MS/MS	1876700000	2109100000	1640200000	1515100000	1231600000	1377700000	1625400000	1489400000
O75150	O75150	10	7	7	E3 ubiquitin-protein ligase BRE1B	RNF40	1	15.5	12.5	12.5	113.65	1001	0	11.562	By MS/MS	By MS/MS	By MS/MS	By MS/MS	By MS/MS	By MS/MS	By MS/MS	By MS/MS	177020000	195880000	90955000	68484000	80860000	107240000	112690000	101960000
O75152	O75152	7	7	7	Zinc finger CCCH domain-containing protein 11A	ZC3H11A	1	13.7	13.7	13.7	89.13	810	0	32.993	By MS/MS	By MS/MS	By MS/MS	By MS/MS	By MS/MS	By MS/MS	By MS/MS	By MS/MS	154160000	186320000	148930000	87665000	153160000	133330000	146900000	145050000
O75153;Q9Y5I4	O75153	31;1	31;1	31;1	Clustered mitochondria protein homolog	CLUH	2	32.7	32.7	32.7	146.67	1309	0	155.02	By MS/MS	By MS/MS	By MS/MS	By MS/MS	By MS/MS	By MS/MS	By MS/MS	By MS/MS	923380000	1376400000	969270000	989790000	1030800000	871880000	998380000	813460000
O75157	O75157	3	3	2	TSC22 domain family protein 2	TSC22D2	1	4	4	2.9	79.227	780	0.00032185	7.6752	By MS/MS	By MS/MS	By MS/MS	By MS/MS	By MS/MS	By MS/MS	By MS/MS	By MS/MS	59930000	71976000	16649000	13640000	15973000	21797000	40945000	58884000
O75165	O75165	11	11	11	DnaJ homolog subfamily C member 13	DNAJC13	1	6.5	6.5	6.5	254.41	2243	0	27.428	By MS/MS	By MS/MS	By MS/MS	By MS/MS	By MS/MS	By MS/MS	By MS/MS	By MS/MS	68593000	473540000	51915000	437730000	24356000	412340000	438770000	60246000
O75175	O75175	2	2	2	CCR4-NOT transcription complex subunit 3	CNOT3	1	4.4	4.4	4.4	81.871	753	0.00028531	4.8883	By MS/MS	By MS/MS			By MS/MS	By MS/MS	By matching	By MS/MS	21265000	47470000			20009000	12251000	23655000	10136000
O75179	O75179	10	10	5	Ankyrin repeat domain-containing protein 17	ANKRD17	1	5.8	5.8	3	274.25	2603	0	49.708	By MS/MS	By MS/MS	By MS/MS	By MS/MS	By MS/MS	By MS/MS	By MS/MS	By MS/MS	99270000	93196000	152510000	86797000	81346000	135000000	121060000	109590000
O75182	O75182	3	3	3	Paired amphipathic helix protein Sin3b	SIN3B	1	4.5	4.5	4.5	133.06	1162	0.00029257	5.459	By MS/MS	By MS/MS	By MS/MS		By MS/MS		By matching		12662000				8368400		8139000
O75190;Q8WWF6;Q8NHS0;P25686	O75190	4;1;1;1	4;1;1;1	4;1;1;1	DnaJ homolog subfamily B member 6	DNAJB6	4	15	15	15	36.087	326	0	11.351	By MS/MS	By MS/MS	By MS/MS	By MS/MS	By MS/MS	By matching	By MS/MS	By MS/MS	46743000	111830000	159100000	113780000	73328000	60937000	31771000	36657000
O75191	O75191	4	4	4	Xylulose kinase	XYLB	1	11.6	11.6	11.6	58.382	536	0.00029274	5.4695	By MS/MS	By matching	By matching	By MS/MS	By MS/MS	By MS/MS	By MS/MS	By matching	26172000	11492000	15927000	138080000	14341000	94471000	31815000	20678000
O75208	O75208	3	3	3	Ubiquinone biosynthesis protein COQ9, mitochondrial	COQ9	1	15.1	15.1	15.1	35.509	318	0	22.497	By MS/MS	By MS/MS	By MS/MS	By MS/MS	By MS/MS	By MS/MS	By MS/MS	By MS/MS	42148000	58976000	55791000	46288000	61339000	38123000	44646000	50276000
O75223	O75223	10	10	10	Gamma-glutamylcyclotransferase	GGCT	1	60.6	60.6	60.6	21.007	188	0	64.251	By MS/MS	By MS/MS	By MS/MS	By MS/MS	By MS/MS	By MS/MS	By MS/MS	By MS/MS	391850000	372310000	374770000	248180000	360600000	360810000	301150000	507090000
O75251	O75251	3	3	3	NADH dehydrogenase [ubiquinone] iron-sulfur protein 7, mitochondrial	NDUFS7	1	23.5	23.5	23.5	23.563	213	0	11.005	By MS/MS	By MS/MS	By MS/MS	By MS/MS	By MS/MS	By MS/MS	By MS/MS	By MS/MS	173870000	109760000	77614000	97680000	95400000	110610000	118300000	126650000
O75306	O75306	12	12	12	NADH dehydrogenase [ubiquinone] iron-sulfur protein 2, mitochondrial	NDUFS2	1	32.8	32.8	32.8	52.545	463	0	32.795	By MS/MS	By MS/MS	By MS/MS	By MS/MS	By MS/MS	By MS/MS	By MS/MS	By MS/MS	569950000	674430000	552180000	421610000	395800000	444730000	587220000	600490000
O75312	O75312	17	17	17	Zinc finger protein ZPR1	ZPR1	1	53.2	53.2	53.2	50.925	459	0	154.01	By MS/MS	By MS/MS	By MS/MS	By MS/MS	By MS/MS	By MS/MS	By MS/MS	By MS/MS	481380000	617690000	507210000	405510000	459390000	512890000	677620000	542300000
O75323	O75323	4	3	3	Protein NipSnap homolog 2	GBAS	1	18.2	15.4	15.4	33.742	286	0.00032798	8.274	By MS/MS	By MS/MS	By MS/MS	By MS/MS	By MS/MS	By MS/MS	By MS/MS	By MS/MS	73106000	73830000	27281000	29532000	20877000	25885000	46758000	26582000
O75340	O75340	9	9	9	Programmed cell death protein 6	PDCD6	1	40.3	40.3	40.3	21.868	191	0	33.608	By MS/MS	By MS/MS	By MS/MS	By MS/MS	By MS/MS	By MS/MS	By MS/MS	By MS/MS	791880000	872300000	536810000	494410000	675830000	594010000	740100000	723800000
O75347	O75347	13	13	13	Tubulin-specific chaperone A	TBCA	1	63.9	63.9	63.9	12.855	108	0	104.26	By MS/MS	By MS/MS	By MS/MS	By MS/MS	By MS/MS	By MS/MS	By MS/MS	By MS/MS	2599600000	3929200000	3019700000	2406800000	2865900000	2403200000	3060400000	2523300000
O75348;O95670	O75348	5;2	5;2	5;2	V-type proton ATPase subunit G 1	ATP6V1G1	2	42.4	42.4	42.4	13.757	118	0	44.415	By MS/MS	By MS/MS	By MS/MS	By MS/MS	By MS/MS	By MS/MS	By MS/MS	By MS/MS	234830000	251780000	221040000	171380000	214440000	196810000	175910000	235230000
O75351;Q6PIW4	O75351	9;1	5;0	5;0	Vacuolar protein sorting-associated protein 4B	VPS4B	2	25	16.7	16.7	49.301	444	0	14.241	By MS/MS	By MS/MS	By MS/MS	By MS/MS	By MS/MS	By MS/MS	By MS/MS	By MS/MS	148010000	167290000	125890000	118410000	91212000	149220000	117010000	120080000
O75352	O75352	3	3	3	Mannose-P-dolichol utilization defect 1 protein	MPDU1	1	13.8	13.8	13.8	26.638	247	0.00033124	8.575	By MS/MS	By MS/MS	By MS/MS	By MS/MS	By MS/MS	By MS/MS	By MS/MS	By MS/MS	308970000	311250000	282420000	226320000	293000000	264440000	267060000	315070000
O75367;Q9P0M6	O75367	17;2	17;2	17;2	Core histone macro-H2A.1	H2AFY	2	50.5	50.5	50.5	39.617	372	0	252.73	By MS/MS	By MS/MS	By MS/MS	By MS/MS	By MS/MS	By MS/MS	By MS/MS	By MS/MS	3113000000	3530300000	2754500000	2445800000	2274600000	3020500000	3335500000	2980000000
O75368	O75368	3	3	3	SH3 domain-binding glutamic acid-rich-like protein	SH3BGRL	1	25.4	25.4	25.4	12.774	114	0.00033069	8.5105	By MS/MS	By MS/MS	By MS/MS	By MS/MS	By MS/MS	By MS/MS	By MS/MS	By MS/MS	48841000	47604000	53384000	24434000	67904000	70943000	52351000	62862000
O75369	O75369	155	155	140	Filamin-B	FLNB	1	74.3	74.3	70.6	278.16	2602	0	323.31	By MS/MS	By MS/MS	By MS/MS	By MS/MS	By MS/MS	By MS/MS	By MS/MS	By MS/MS	29928000000	32970000000	25767000000	22188000000	27561000000	27162000000	33799000000	31397000000
O75380	O75380	4	4	4	NADH dehydrogenase [ubiquinone] iron-sulfur protein 6, mitochondrial	NDUFS6	1	52.4	52.4	52.4	13.711	124	0	13.501	By MS/MS	By MS/MS	By MS/MS	By MS/MS	By MS/MS	By MS/MS	By MS/MS	By MS/MS	103790000	97556000	181630000	148570000	135980000	165750000	44735000	160110000
O75381	O75381	3	3	3	Peroxisomal membrane protein PEX14	PEX14	1	14.9	14.9	14.9	41.236	377	0.00032165	7.6641	By MS/MS	By MS/MS	By MS/MS	By MS/MS	By matching			By matching	9465300	81411000	21112000	28083000	30110000			16310000
O75390	O75390	20	20	20	Citrate synthase, mitochondrial	CS	1	56	56	56	51.712	466	0	214.12	By MS/MS	By MS/MS	By MS/MS	By MS/MS	By MS/MS	By MS/MS	By MS/MS	By MS/MS	4683400000	5508800000	4144000000	3548500000	4372500000	4005500000	5396300000	3913100000
O75391	O75391	6	6	6	Sperm-associated antigen 7	SPAG7	1	40.5	40.5	40.5	26.034	227	0	19.047	By MS/MS	By MS/MS	By MS/MS	By MS/MS	By MS/MS	By MS/MS	By matching	By MS/MS	57164000	206920000	170660000	149100000	71276000	39920000	28131000	82428000
O75396	O75396	11	11	11	Vesicle-trafficking protein SEC22b	SEC22B	1	52.1	52.1	52.1	24.593	215	0	62.214	By MS/MS	By MS/MS	By MS/MS	By MS/MS	By MS/MS	By MS/MS	By MS/MS	By MS/MS	884490000	777030000	586570000	338910000	713820000	492480000	895550000	687310000
O75400	O75400	13	13	13	Pre-mRNA-processing factor 40 homolog A	PRPF40A	1	15.5	15.5	15.5	108.8	957	0	40.265	By MS/MS	By MS/MS	By MS/MS	By MS/MS	By MS/MS	By MS/MS	By MS/MS	By MS/MS	320290000	611340000	356980000	421960000	774230000	464630000	575660000	578510000
O75410	O75410	2	2	2	Transforming acidic coiled-coil-containing protein 1	TACC1	1	4.5	4.5	4.5	87.793	805	0.0039225	2.3302	By matching	By MS/MS			By matching	By matching		By MS/MS	12771000				9575100	16225000		17660000
O75431	O75431	5	5	5	Metaxin-2	MTX2	1	35	35	35	29.763	263	0	49.908	By MS/MS	By MS/MS	By MS/MS	By MS/MS	By MS/MS	By MS/MS	By MS/MS	By MS/MS	89083000	194090000	155700000	145010000	188830000	70687000	56237000	60360000
O75436	O75436	13	13	12	Vacuolar protein sorting-associated protein 26A	VPS26A	1	52.3	52.3	50.2	38.169	327	0	56.981	By MS/MS	By MS/MS	By MS/MS	By MS/MS	By MS/MS	By MS/MS	By MS/MS	By MS/MS	508870000	578960000	563340000	505120000	336850000	366020000	391880000	578200000
O75438	O75438	2	2	2	NADH dehydrogenase [ubiquinone] 1 beta subcomplex subunit 1	NDUFB1	1	32.8	32.8	32.8	6.9611	58	0.00029718	5.8065	By MS/MS	By MS/MS	By MS/MS	By MS/MS	By MS/MS	By MS/MS	By MS/MS	By MS/MS	78669000	101020000	56451000	51399000	59185000	73418000	82388000	68952000
O75439	O75439	13	13	13	Mitochondrial-processing peptidase subunit beta	PMPCB	1	31.7	31.7	31.7	54.366	489	0	101.39	By MS/MS	By MS/MS	By MS/MS	By MS/MS	By MS/MS	By MS/MS	By MS/MS	By MS/MS	524700000	640910000	459060000	416730000	473830000	464180000	474540000	424270000
O75448	O75448	4	4	4	Mediator of RNA polymerase II transcription subunit 24	MED24	1	5.7	5.7	5.7	110.3	989	0.00030248	6.1315	By MS/MS	By MS/MS	By MS/MS	By MS/MS	By MS/MS	By MS/MS	By MS/MS	By MS/MS	38887000	34461000	22405000	8896800	32641000	6089000	8964100	23226000
O75475;Q9Y3E1	O75475	23;2	23;2	21;0	PC4 and SFRS1-interacting protein	PSIP1	2	42.6	42.6	40.8	60.103	530	0	89.179	By MS/MS	By MS/MS	By MS/MS	By MS/MS	By MS/MS	By MS/MS	By MS/MS	By MS/MS	1947800000	2091300000	2070500000	1999800000	1832400000	1363500000	1691500000	1798900000
O75477	O75477	11	7	7	Erlin-1	ERLIN1	1	38.7	26.9	26.9	38.925	346	0	45.21	By MS/MS	By MS/MS	By MS/MS	By MS/MS	By MS/MS	By MS/MS	By MS/MS	By MS/MS	145750000	141490000	60054000	94080000	127880000	172470000	217980000	270610000
O75489	O75489	14	14	14	NADH dehydrogenase [ubiquinone] iron-sulfur protein 3, mitochondrial	NDUFS3	1	52.7	52.7	52.7	30.241	264	0	48.484	By MS/MS	By MS/MS	By MS/MS	By MS/MS	By MS/MS	By MS/MS	By MS/MS	By MS/MS	710480000	911790000	655040000	468730000	595460000	513090000	662500000	718130000
O75494;Q8WXF0	O75494	11;3	11;3	11;3	Serine/arginine-rich splicing factor 10	SRSF10	2	29	29	29	31.3	262	0	44.25	By MS/MS	By MS/MS	By MS/MS	By MS/MS	By MS/MS	By MS/MS	By MS/MS	By MS/MS	769900000	789880000	663210000	737250000	604140000	927280000	872920000	710860000
O75506	O75506	4	4	4	Heat shock factor-binding protein 1	HSBP1	1	81.6	81.6	81.6	8.5435	76	0	143.94	By MS/MS	By MS/MS	By MS/MS	By MS/MS	By MS/MS	By MS/MS	By MS/MS	By MS/MS	1450300000	955780000	689480000	634350000	376050000	294120000	641700000	832930000
O75521	O75521	7	7	7	Enoyl-CoA delta isomerase 2, mitochondrial	ECI2	1	34.5	34.5	34.5	43.585	394	0	24.2	By MS/MS	By MS/MS	By MS/MS	By MS/MS	By MS/MS	By MS/MS	By MS/MS	By MS/MS	115390000	160430000	153160000	87211000	112350000	65343000	239790000	128000000
O75530	O75530	7	7	7	Polycomb protein EED	EED	1	19	19	19	50.197	441	0	13.403	By MS/MS	By MS/MS	By MS/MS	By MS/MS	By MS/MS	By MS/MS	By MS/MS	By MS/MS	151570000	143610000	133040000	92690000	82615000	64200000	98989000	121640000
O75531	O75531	8	8	8	Barrier-to-autointegration factor;Barrier-to-autointegration factor, N-terminally processed	BANF1	1	79.8	79.8	79.8	10.058	89	0	47.208	By MS/MS	By MS/MS	By MS/MS	By MS/MS	By MS/MS	By MS/MS	By MS/MS	By MS/MS	2333900000	2664300000	2554800000	2416700000	2256000000	2234100000	2559000000	2398300000
O75533	O75533	57	57	57	Splicing factor 3B subunit 1	SF3B1	1	55.4	55.4	55.4	145.83	1304	0	323.31	By MS/MS	By MS/MS	By MS/MS	By MS/MS	By MS/MS	By MS/MS	By MS/MS	By MS/MS	4445600000	5737800000	4312300000	3594100000	3967200000	3844300000	4918000000	4700200000
O75534	O75534	39	39	39	Cold shock domain-containing protein E1	CSDE1	1	50.4	50.4	50.4	88.884	798	0	134.52	By MS/MS	By MS/MS	By MS/MS	By MS/MS	By MS/MS	By MS/MS	By MS/MS	By MS/MS	2999800000	3314400000	2637500000	2190700000	2158500000	1912500000	2179900000	2129500000
O75569	O75569	3	3	3	Interferon-inducible double-stranded RNA-dependent protein kinase activator A	PRKRA	1	11.8	11.8	11.8	34.404	313	0.00032289	7.7612		By MS/MS	By MS/MS	By MS/MS	By MS/MS	By MS/MS				31570000		25506000	14087000	20789000
O75607	O75607	4	4	4	Nucleoplasmin-3	NPM3	1	41	41	41	19.343	178	0	106.98	By MS/MS	By MS/MS	By MS/MS	By MS/MS	By MS/MS	By MS/MS	By MS/MS	By MS/MS	569070000	571210000	558880000	441810000	408230000	421500000	569960000	667650000
O75608	O75608	5	5	5	Acyl-protein thioesterase 1	LYPLA1	1	39.6	39.6	39.6	24.669	230	0	94.375	By MS/MS	By MS/MS	By MS/MS	By MS/MS	By MS/MS	By MS/MS	By MS/MS	By MS/MS	404200000	170340000	199640000	221910000	176410000	182680000	373570000	349540000
O75616	O75616	3	3	3	GTPase Era, mitochondrial	ERAL1	1	13	13	13	48.349	437	0.0027638	2.6607	By matching	By MS/MS	By MS/MS	By MS/MS	By MS/MS	By MS/MS	By matching	By MS/MS	38234000	85996000	32441000	64108000	32809000	18469000	24982000	23240000
O75629	O75629	2	2	2	Protein CREG1	CREG1	1	15	15	15	24.074	220	0.00032755	8.2575	By matching	By MS/MS	By MS/MS	By MS/MS	By MS/MS	By MS/MS	By matching	By MS/MS	153700000	198950000	120260000	128810000	118380000	129170000	128610000	174150000
O75643	O75643	85	85	85	U5 small nuclear ribonucleoprotein 200 kDa helicase	SNRNP200	1	50.7	50.7	50.7	244.5	2136	0	323.31	By MS/MS	By MS/MS	By MS/MS	By MS/MS	By MS/MS	By MS/MS	By MS/MS	By MS/MS	4917000000	6090700000	5155000000	4307700000	4304700000	4064300000	4768800000	4177100000
O75663	O75663	14	14	14	TIP41-like protein	TIPRL	1	70.2	70.2	70.2	31.444	272	0	75.403	By MS/MS	By MS/MS	By MS/MS	By MS/MS	By MS/MS	By MS/MS	By MS/MS	By MS/MS	1362700000	1484500000	1341000000	1193300000	1230100000	1163700000	1147200000	1186600000
O75683	O75683	11	11	11	Surfeit locus protein 6	SURF6	1	38.5	38.5	38.5	41.45	361	0	40.542	By MS/MS	By MS/MS	By MS/MS	By MS/MS	By MS/MS	By MS/MS	By MS/MS	By MS/MS	336140000	312310000	318250000	355200000	304840000	487090000	545420000	432960000
O75688	O75688	5	5	3	Protein phosphatase 1B	PPM1B	1	14.6	14.6	10	52.642	479	0.00029197	5.4143	By MS/MS	By MS/MS	By matching	By MS/MS	By matching	By MS/MS	By MS/MS	By MS/MS	52059000	40688000	36672000	50356000	49171000	57252000	70596000	39286000
O75691	O75691	23	23	23	Small subunit processome component 20 homolog	UTP20	1	10.8	10.8	10.8	318.38	2785	0	47.69	By MS/MS	By MS/MS	By MS/MS	By MS/MS	By MS/MS	By MS/MS	By MS/MS	By MS/MS	827410000	551440000	390690000	216000000	297950000	259650000	351810000	316390000
O75694	O75694	29	29	29	Nuclear pore complex protein Nup155	NUP155	1	32.7	32.7	32.7	155.2	1391	0	231.02	By MS/MS	By MS/MS	By MS/MS	By MS/MS	By MS/MS	By MS/MS	By MS/MS	By MS/MS	1026900000	1016900000	909580000	811240000	877980000	828530000	752520000	852490000
O75695	O75695	2	2	2	Protein XRP2	RP2	1	5.4	5.4	5.4	39.641	350	0.00027724	4.2712	By matching	By MS/MS	By MS/MS	By MS/MS	By MS/MS		By MS/MS	By MS/MS	29399000	22094000	11897000	9741600			5798400
O75718	O75718	7	7	7	Cartilage-associated protein	CRTAP	1	19.7	19.7	19.7	46.561	401	0	16.658	By MS/MS	By MS/MS	By MS/MS	By MS/MS	By MS/MS	By MS/MS	By MS/MS	By MS/MS	802050000	875050000	440560000	329010000	350570000	339310000	345180000	436460000
O75746	O75746	7	3	3	Calcium-binding mitochondrial carrier protein Aralar1	SLC25A12	1	12.5	6	6	74.761	678	0.00027241	3.9471	By MS/MS	By MS/MS	By MS/MS	By MS/MS	By MS/MS	By MS/MS	By matching	By MS/MS		15538000	18795000	9881300	9829400	9714200		18638000
O75787	O75787	2	2	2	Renin receptor	ATP6AP2	1	7.7	7.7	7.7	39.008	350	0.0002858	4.9112	By MS/MS	By MS/MS	By MS/MS	By MS/MS	By matching	By matching	By matching	By matching	11877000	11042000	13652000	8374100	6471700	4692300	9745100	6501900
O75792	O75792	5	5	5	Ribonuclease H2 subunit A	RNASEH2A	1	24.1	24.1	24.1	33.395	299	0	19.304	By MS/MS	By MS/MS	By MS/MS	By MS/MS	By MS/MS	By MS/MS	By MS/MS	By MS/MS	85660000	84340000	93930000	74087000	30856000	22190000	29684000	39322000
O75794	O75794	9	9	9	Cell division cycle protein 123 homolog	CDC123	1	38.1	38.1	38.1	39.134	336	0	22.407	By MS/MS	By MS/MS	By MS/MS	By MS/MS	By MS/MS	By MS/MS	By matching	By MS/MS	328250000	379520000	365520000	287460000	124450000	174320000	129400000	135320000
O75815	O75815	16	16	16	Breast cancer anti-estrogen resistance protein 3	BCAR3	1	28.6	28.6	28.6	92.565	825	0	34.316	By MS/MS	By MS/MS	By MS/MS	By MS/MS	By MS/MS	By MS/MS	By MS/MS	By MS/MS	367100000	393740000	300520000	327650000	318190000	290530000	324020000	311180000
O75818	O75818	4	4	4	Ribonuclease P protein subunit p40	RPP40	1	14.3	14.3	14.3	41.833	363	0.00053149	3.5375	By MS/MS	By MS/MS	By MS/MS		By MS/MS	By MS/MS	By matching	By MS/MS	32035000	34348000	21590000		11548000	32144000	17860000	210780000
O75821	O75821	19	19	19	Eukaryotic translation initiation factor 3 subunit G	EIF3G	1	78.4	78.4	78.4	35.611	320	0	292.87	By MS/MS	By MS/MS	By MS/MS	By MS/MS	By MS/MS	By MS/MS	By MS/MS	By MS/MS	2035000000	2287800000	1994400000	1885800000	1621500000	1907400000	2485900000	1915800000
O75822	O75822	18	18	18	Eukaryotic translation initiation factor 3 subunit J	EIF3J	1	47.7	47.7	47.7	29.062	258	0	137.89	By MS/MS	By MS/MS	By MS/MS	By MS/MS	By MS/MS	By MS/MS	By MS/MS	By MS/MS	1019700000	1228600000	1151300000	1067300000	1034300000	1127800000	979440000	1242100000
O75828	O75828	10	8	8	Carbonyl reductase [NADPH] 3	CBR3	1	50.2	39.7	39.7	30.85	277	0	28.452	By MS/MS	By MS/MS	By MS/MS	By MS/MS	By MS/MS	By MS/MS	By MS/MS	By MS/MS	161520000	213090000	144510000	150570000	301200000	336730000	370520000	356950000
O75832	O75832	9	9	9	26S proteasome non-ATPase regulatory subunit 10	PSMD10	1	44.2	44.2	44.2	24.428	226	0	41.786	By MS/MS	By MS/MS	By MS/MS	By MS/MS	By MS/MS	By MS/MS	By MS/MS	By MS/MS	286340000	572640000	390000000	265180000	395150000	368520000	286690000	487820000
O75844	O75844	11	11	11	CAAX prenyl protease 1 homolog	ZMPSTE24	1	24.6	24.6	24.6	54.812	475	0	65.356	By MS/MS	By MS/MS	By MS/MS	By MS/MS	By MS/MS	By MS/MS	By MS/MS	By MS/MS	208960000	478250000	412700000	313240000	460930000	334980000	364220000	465840000
O75874	O75874	24	24	24	Isocitrate dehydrogenase [NADP] cytoplasmic	IDH1	1	60.9	60.9	60.9	46.659	414	0	107.09	By MS/MS	By MS/MS	By MS/MS	By MS/MS	By MS/MS	By MS/MS	By MS/MS	By MS/MS	1586100000	1977800000	1448800000	1462500000	1608400000	1830700000	1944500000	1841700000
O75880	O75880	5	5	5	Protein SCO1 homolog, mitochondrial	SCO1	1	22.9	22.9	22.9	33.814	301	0	14.931	By MS/MS	By MS/MS	By MS/MS	By MS/MS	By MS/MS	By MS/MS	By MS/MS	By MS/MS	346530000	377350000	335670000	221280000	257510000	324930000	568260000	385800000
O75884	O75884	5	5	5	Putative hydrolase RBBP9	RBBP9	1	41.4	41.4	41.4	21	186	0	11.42	By MS/MS	By MS/MS	By MS/MS	By MS/MS	By MS/MS	By MS/MS	By MS/MS	By MS/MS	84484000	91613000	43661000	30258000	52484000	34146000	62017000	16428000
O75886	O75886	3	2	2	Signal transducing adapter molecule 2	STAM2	1	6.9	5.1	5.1	58.164	525	0.00029343	5.4997	By matching	By matching	By MS/MS	By MS/MS	By MS/MS	By matching	By MS/MS	By matching	14895000		38009000	25952000	11717000		22810000	18507000
O75909	O75909	3	3	3	Cyclin-K	CCNK	1	9.3	9.3	9.3	64.239	580	0	18.252		By MS/MS		By MS/MS	By MS/MS		By MS/MS	By MS/MS		27680000		15280000	42261000		32176000	46430000
O75915	O75915	5	5	5	PRA1 family protein 3	ARL6IP5	1	25	25	25	21.614	188	0	15.244	By MS/MS	By MS/MS	By MS/MS	By MS/MS	By MS/MS	By MS/MS	By MS/MS	By MS/MS	940720000	325720000	301860000	299440000	289150000	281980000	904670000	177430000
O75934	O75934	4	4	4	Pre-mRNA-splicing factor SPF27	BCAS2	1	35.1	35.1	35.1	26.131	225	0	29.9	By MS/MS	By MS/MS	By MS/MS	By MS/MS	By MS/MS	By MS/MS	By MS/MS	By MS/MS	299210000	423390000	306020000	246860000	363280000	314560000	219750000	223310000
O75935	O75935	2	2	2	Dynactin subunit 3	DCTN3	1	14.5	14.5	14.5	21.119	186	0.00031387	7.0343	By MS/MS	By MS/MS	By MS/MS	By MS/MS	By MS/MS	By matching	By matching	By MS/MS	34516000	444970000	395360000	20562000	400520000	373610000	370510000	350770000
O75937	O75937	9	9	9	DnaJ homolog subfamily C member 8	DNAJC8	1	44.7	44.7	44.7	29.841	253	0	55.414	By MS/MS	By MS/MS	By MS/MS	By MS/MS	By MS/MS	By MS/MS	By MS/MS	By MS/MS	791530000	1077800000	875400000	685620000	604560000	525620000	343750000	560860000
O75940	O75940	5	5	5	Survival of motor neuron-related-splicing factor 30	SMNDC1	1	38.2	38.2	38.2	26.711	238	0	56.191	By MS/MS	By MS/MS	By MS/MS	By MS/MS	By MS/MS	By MS/MS	By MS/MS	By MS/MS	211290000	259140000	198150000	172220000	177580000	187740000	190910000	212080000
O75947	O75947	12	12	12	ATP synthase subunit d, mitochondrial	ATP5H	1	78.9	78.9	78.9	18.491	161	0	54.111	By MS/MS	By MS/MS	By MS/MS	By MS/MS	By MS/MS	By MS/MS	By MS/MS	By MS/MS	1429800000	1851100000	1359400000	1151200000	1508400000	1342600000	1508500000	1720200000
O75955	O75955	9	9	9	Flotillin-1	FLOT1	1	26.5	26.5	26.5	47.355	427	0	20.935	By MS/MS	By MS/MS	By MS/MS	By MS/MS	By MS/MS	By MS/MS	By MS/MS	By MS/MS	196910000	222990000	189330000	145830000	196950000	178340000	195720000	177650000
O75964	O75964	4	4	4	ATP synthase subunit g, mitochondrial	ATP5L	1	33	33	33	11.428	103	0	14.126	By MS/MS	By MS/MS	By MS/MS	By MS/MS	By MS/MS	By MS/MS	By MS/MS	By MS/MS	132590000	157490000	158140000	153160000	176090000	159270000	164810000	162420000
O75976	O75976	7	7	7	Carboxypeptidase D	CPD	1	8.8	8.8	8.8	152.93	1380	0	29.415	By MS/MS	By MS/MS	By MS/MS	By MS/MS	By MS/MS	By matching	By MS/MS	By MS/MS	107670000	109220000	79215000	58271000	31291000	30289000	31893000	52252000
O76003	O76003	22	22	22	Glutaredoxin-3	GLRX3	1	59.4	59.4	59.4	37.432	335	0	314.71	By MS/MS	By MS/MS	By MS/MS	By MS/MS	By MS/MS	By MS/MS	By MS/MS	By MS/MS	4102800000	4341100000	3505600000	3082000000	3050400000	3352800000	3399400000	3625700000
O76021	O76021	36	36	36	Ribosomal L1 domain-containing protein 1	RSL1D1	1	62.9	62.9	62.9	54.972	490	0	247.61	By MS/MS	By MS/MS	By MS/MS	By MS/MS	By MS/MS	By MS/MS	By MS/MS	By MS/MS	7971900000	7552400000	6643800000	5795400000	8190500000	8458300000	9284200000	8475300000
O76031	O76031	15	15	15	ATP-dependent Clp protease ATP-binding subunit clpX-like, mitochondrial	CLPX	1	29.2	29.2	29.2	69.223	633	0	43.516	By MS/MS	By MS/MS	By MS/MS	By MS/MS	By MS/MS	By MS/MS	By MS/MS	By MS/MS	643280000	604110000	441790000	404450000	402370000	407140000	640540000	421640000
O76071	O76071	7	7	7	Probable cytosolic iron-sulfur protein assembly protein CIAO1	CIAO1	1	38.9	38.9	38.9	37.84	339	0	35.748	By MS/MS	By MS/MS	By MS/MS	By MS/MS	By MS/MS	By MS/MS	By MS/MS	By MS/MS	433010000	540610000	315950000	300820000	262740000	307300000	305780000	299710000
O76080	O76080	2	2	2	AN1-type zinc finger protein 5	ZFAND5	1	24.4	24.4	24.4	23.132	213	0	27.219	By MS/MS	By MS/MS	By MS/MS	By MS/MS					50172000	51150000	57723000	43854000
O76094	O76094	23	23	23	Signal recognition particle subunit SRP72	SRP72	1	46.6	46.6	46.6	74.605	671	0	209.01	By MS/MS	By MS/MS	By MS/MS	By MS/MS	By MS/MS	By MS/MS	By MS/MS	By MS/MS	1277800000	1565300000	1314000000	1115600000	1090800000	995200000	1122900000	1026500000
O94760;O95865	O94760	6;1	6;1	6;1	N(G),N(G)-dimethylarginine dimethylaminohydrolase 1	DDAH1	2	28.4	28.4	28.4	31.121	285	0	11.983	By MS/MS	By MS/MS	By MS/MS	By MS/MS	By MS/MS	By MS/MS	By MS/MS	By MS/MS	145770000	154070000	88197000	128110000	76491000	86977000	83542000	95828000
O94762	O94762	2	2	2	ATP-dependent DNA helicase Q5	RECQL5	1	1.9	1.9	1.9	108.86	991	0.0080569	1.915	By matching	By MS/MS	By matching	By MS/MS	By MS/MS	By MS/MS	By matching	By MS/MS	885730000	688900000	460460000	520490000	575490000	574980000	565830000	486730000
O94776	O94776	21	21	20	Metastasis-associated protein MTA2	MTA2	1	36.4	36.4	34.9	75.022	668	0	93.156	By MS/MS	By MS/MS	By MS/MS	By MS/MS	By MS/MS	By MS/MS	By MS/MS	By MS/MS	1095000000	1131800000	943150000	759910000	904230000	739500000	966330000	901950000
O94804	O94804	20	20	19	Serine/threonine-protein kinase 10	STK10	1	28.2	28.2	27.1	112.13	968	0	122.46	By MS/MS	By MS/MS	By MS/MS	By MS/MS	By MS/MS	By MS/MS	By MS/MS	By MS/MS	783330000	909380000	715580000	644990000	523850000	601570000	740720000	614080000
O94808	O94808	18	11	11	Glutamine--fructose-6-phosphate aminotransferase [isomerizing] 2	GFPT2	1	36.8	23.3	23.3	76.93	682	0	26.573	By MS/MS	By MS/MS	By MS/MS	By MS/MS	By MS/MS	By MS/MS	By MS/MS	By MS/MS	308840000	286930000	277560000	268040000	190900000	193460000	242120000	276690000
O94817	O94817	2	2	2	Ubiquitin-like protein ATG12	ATG12	1	12.1	12.1	12.1	15.113	140	0.00053634	3.6738	By MS/MS	By MS/MS	By MS/MS	By MS/MS	By MS/MS	By MS/MS	By MS/MS	By MS/MS	33611000	29105000	27106000	22872000	15688000	5398100	16658000	14393000
O94822	O94822	10	10	10	E3 ubiquitin-protein ligase listerin	LTN1	1	7.4	7.4	7.4	200.55	1766	0	20.113	By MS/MS	By MS/MS	By MS/MS	By MS/MS	By MS/MS	By MS/MS	By MS/MS	By MS/MS	83615000	252710000	43613000	58359000	58483000	56091000	28734000	56873000
O94826	O94826	29	29	29	Mitochondrial import receptor subunit TOM70	TOMM70A	1	60	60	60	67.454	608	0	220.35	By MS/MS	By MS/MS	By MS/MS	By MS/MS	By MS/MS	By MS/MS	By MS/MS	By MS/MS	2349600000	2608700000	2242300000	1587200000	2014000000	1932600000	2482800000	2158800000
O94842	O94842	2	2	2	TOX high mobility group box family member 4	TOX4	1	3.4	3.4	3.4	66.194	621	0.00028935	5.209	By MS/MS	By matching	By MS/MS	By MS/MS	By MS/MS	By MS/MS	By MS/MS	By MS/MS	8593700	10569000	8296000	8340700	10829000	10201000	38444000	46409000
O94855	O94855	7	6	6	Protein transport protein Sec24D	SEC24D	1	9.1	7.7	7.7	113.01	1032	0	9.5685	By MS/MS	By MS/MS	By MS/MS	By MS/MS	By MS/MS	By MS/MS	By MS/MS	By MS/MS	122270000	102970000	108480000	96248000	91681000	85671000	126590000	76749000
O94874	O94874	3	3	3	E3 UFM1-protein ligase 1	UFL1	1	5.3	5.3	5.3	89.594	794	0.00028217	4.6808	By MS/MS	By MS/MS	By MS/MS	By MS/MS	By MS/MS	By MS/MS	By MS/MS	By MS/MS	18497000	22481000	14204000	12392000	9890300	79778000	27652000	15761000
O94880	O94880	3	3	3	PHD finger protein 14	PHF14	1	3.4	3.4	3.4	100.05	888	0.00028571	4.9087	By matching	By MS/MS	By MS/MS				By MS/MS		5645500	15963000	21335000
O94888	O94888	4	4	4	UBX domain-containing protein 7	UBXN7	1	10.6	10.6	10.6	54.862	489	0.00033212	8.7358	By MS/MS	By matching	By matching	By MS/MS	By MS/MS	By MS/MS	By matching	By matching	53459000	80913000	53001000	47094000	69267000	41739000	40594000	30006000
O94901	O94901	3	3	3	SUN domain-containing protein 1	SUN1	1	6.3	6.3	6.3	90.063	812	0.00029967	5.9471	By MS/MS		By MS/MS	By MS/MS	By matching		By matching	By matching	30366000		41808000	4421200	13002000		30434000	27238000
O94905	O94905	12	12	8	Erlin-2	ERLIN2	1	42.5	42.5	30.4	37.839	339	0	40.391	By MS/MS	By MS/MS	By MS/MS	By MS/MS	By MS/MS	By MS/MS	By MS/MS	By MS/MS	465470000	451950000	371000000	272710000	291880000	323300000	404020000	337980000
O94906	O94906	28	28	28	Pre-mRNA-processing factor 6	PRPF6	1	35.2	35.2	35.2	106.92	941	0	97.64	By MS/MS	By MS/MS	By MS/MS	By MS/MS	By MS/MS	By MS/MS	By MS/MS	By MS/MS	1206200000	1434000000	1072000000	813010000	881430000	797810000	918110000	915790000
O94915	O94915	9	9	9	Protein furry homolog-like	FRYL	1	3.8	3.8	3.8	339.59	3013	0	36.942	By MS/MS	By MS/MS	By MS/MS	By matching	By MS/MS	By MS/MS	By MS/MS	By MS/MS	112080000	89396000	131450000	32677000	25398000	171850000	186220000	160880000
O94916	O94916	2	2	2	Nuclear factor of activated T-cells 5	NFAT5	1	1.7	1.7	1.7	165.76	1531	0.00029595	5.7154	By matching	By matching	By MS/MS		By MS/MS	By matching			12314000	14272000	10829000			11863000
O94925	O94925	18	18	18	Glutaminase kidney isoform, mitochondrial	GLS	1	33.8	33.8	33.8	73.46	669	0	141.64	By MS/MS	By MS/MS	By MS/MS	By MS/MS	By MS/MS	By MS/MS	By MS/MS	By MS/MS	1146000000	1474600000	1152400000	931550000	722020000	707320000	832300000	707030000
O94966	O94966	8	8	8	Ubiquitin carboxyl-terminal hydrolase 19	USP19	1	11	11	11	145.65	1318	0	36.847	By MS/MS	By MS/MS	By MS/MS	By MS/MS	By MS/MS	By MS/MS	By MS/MS	By MS/MS	95364000	156020000	140670000	124590000	91739000	49541000	116740000	107220000
O94973	O94973	15	7	7	AP-2 complex subunit alpha-2	AP2A2	1	22.7	12.4	12.4	103.96	939	0	26.536	By MS/MS	By MS/MS	By MS/MS	By MS/MS	By MS/MS	By MS/MS	By MS/MS	By MS/MS	72449000	159490000	146730000	148920000	157670000	132110000	126770000	103130000
O94979	O94979	22	22	22	Protein transport protein Sec31A	SEC31A	1	22.8	22.8	22.8	133.01	1220	0	55.206	By MS/MS	By MS/MS	By MS/MS	By MS/MS	By MS/MS	By MS/MS	By MS/MS	By MS/MS	805580000	714960000	644930000	582160000	520860000	541350000	705780000	670200000
O94992	O94992	8	8	8	Protein HEXIM1	HEXIM1	1	31.2	31.2	31.2	40.623	359	0	80.593	By MS/MS	By MS/MS	By MS/MS	By MS/MS	By MS/MS	By MS/MS	By MS/MS	By MS/MS	286840000	337280000	222440000	211010000	209040000	253180000	266270000	215090000
O95071	O95071	12	12	12	E3 ubiquitin-protein ligase UBR5	UBR5	1	7.3	7.3	7.3	309.35	2799	0	25.557	By MS/MS	By MS/MS	By MS/MS	By MS/MS	By MS/MS	By MS/MS	By MS/MS	By MS/MS	165500000	207020000	141940000	97269000	69486000	69962000	94415000	85231000
O95104	O95104	5	5	3	Splicing factor, arginine/serine-rich 15	SCAF4	1	7.8	7.8	6.2	125.87	1147	0	33.802	By MS/MS	By MS/MS	By MS/MS	By MS/MS	By MS/MS	By MS/MS	By MS/MS	By MS/MS	123120000	105360000	96096000	41488000	43195000	104090000	176580000	128800000
O95139	O95139	2	2	2	NADH dehydrogenase [ubiquinone] 1 beta subcomplex subunit 6	NDUFB6	1	29.7	29.7	29.7	15.489	128	0.0046308	2.2662	By MS/MS	By MS/MS	By MS/MS	By MS/MS	By MS/MS	By matching	By MS/MS	By MS/MS	77718000	87428000	61112000	36007000	33352000	42816000	54317000	38272000
O95149	O95149	2	2	2	Snurportin-1	SNUPN	1	5.6	5.6	5.6	41.142	360	0.0015699	3.2182	By MS/MS	By MS/MS	By MS/MS	By MS/MS	By MS/MS	By MS/MS	By MS/MS	By MS/MS	13541000	8906700	37601000	20128000	18803000	20656000	28885000	10263000
O95155	O95155	10	10	10	Ubiquitin conjugation factor E4 B	UBE4B	1	14.4	14.4	14.4	146.18	1302	0	45.442	By MS/MS	By MS/MS	By MS/MS	By MS/MS	By MS/MS	By MS/MS	By MS/MS	By MS/MS	171860000	215510000	95930000	93722000	30227000	71391000	80113000	100350000
O95159	O95159	2	2	2	Zinc finger protein-like 1	ZFPL1	1	9.4	9.4	9.4	34.114	310	0.00029806	5.8616	By MS/MS	By MS/MS	By MS/MS	By MS/MS	By MS/MS	By MS/MS	By MS/MS	By MS/MS	44042000	47184000	63624000	54929000	32997000	50247000	53073000	63405000
O95163	O95163	22	22	22	Elongator complex protein 1	IKBKAP	1	24.7	24.7	24.7	150.25	1332	0	87.053	By MS/MS	By MS/MS	By MS/MS	By MS/MS	By MS/MS	By MS/MS	By MS/MS	By MS/MS	427880000	410030000	363920000	331180000	245980000	239750000	316190000	214690000
O95168	O95168	3	3	3	NADH dehydrogenase [ubiquinone] 1 beta subcomplex subunit 4	NDUFB4	1	31	31	31	15.208	129	0	26.174	By MS/MS	By MS/MS	By MS/MS	By MS/MS	By MS/MS	By MS/MS	By MS/MS	By MS/MS	126090000	143280000	117890000	104380000	102470000	95166000	137100000	81384000
O95169	O95169	3	3	3	NADH dehydrogenase [ubiquinone] 1 beta subcomplex subunit 8, mitochondrial	NDUFB8	1	19.9	19.9	19.9	21.766	186	0.0005298	3.4929	By MS/MS	By MS/MS	By MS/MS	By MS/MS	By MS/MS	By matching	By MS/MS	By MS/MS	39405000	63048000	47350000	29978000	38796000	7790600	34624000	65082000
O95183	O95183	4	4	4	Vesicle-associated membrane protein 5	VAMP5	1	34.5	34.5	34.5	12.805	116	0	25.954	By MS/MS	By MS/MS	By MS/MS	By MS/MS	By MS/MS	By MS/MS	By MS/MS	By MS/MS	35552000	73307000	22905000	72592000	230110000	211670000	130340000	287930000
O95197	O95197	2	2	2	Reticulon-3	RTN3	1	4.8	4.8	4.8	112.61	1032	0	46.821	By MS/MS	By MS/MS	By MS/MS	By MS/MS	By MS/MS	By MS/MS	By MS/MS	By MS/MS	163040000	180240000	101610000	116570000	192050000	126210000	240980000	123140000
O95202	O95202	24	24	24	LETM1 and EF-hand domain-containing protein 1, mitochondrial	LETM1	1	45.5	45.5	45.5	83.353	739	0	86.963	By MS/MS	By MS/MS	By MS/MS	By MS/MS	By MS/MS	By MS/MS	By MS/MS	By MS/MS	1196800000	1410800000	952170000	755740000	808090000	866740000	1141800000	1208600000
O95218	O95218	7	7	7	Zinc finger Ran-binding domain-containing protein 2	ZRANB2	1	20.3	20.3	20.3	37.404	330	0	16.748	By MS/MS	By MS/MS	By MS/MS	By MS/MS	By MS/MS	By MS/MS	By MS/MS	By MS/MS	351680000	436150000	283620000	263140000	292030000	275680000	303510000	318880000
O95219	O95219	4	4	4	Sorting nexin-4	SNX4	1	10.7	10.7	10.7	51.908	450	0	8.9995	By matching	By MS/MS	By MS/MS	By matching	By MS/MS	By MS/MS	By MS/MS	By MS/MS	42378000	71426000	44906000	47926000	79562000	55404000	71388000	46226000
O95229	O95229	3	3	3	ZW10 interactor	ZWINT	1	12.3	12.3	12.3	31.293	277	0	13.711	By MS/MS	By MS/MS	By MS/MS	By MS/MS	By matching		By matching	By matching	20941000	35629000			11189000		14678000	16748000
O95232	O95232	10	10	10	Luc7-like protein 3	LUC7L3	1	24.5	24.5	24.5	51.466	432	0	164.02	By MS/MS	By MS/MS	By MS/MS	By MS/MS	By MS/MS	By MS/MS	By MS/MS	By MS/MS	396890000	608220000	405810000	464150000	510250000	433470000	549250000	606350000
O95239;Q2VIQ3;Q6ZMV9	O95239	9;4;1	9;4;1	8;3;0	Chromosome-associated kinesin KIF4A	KIF4A	3	8.6	8.6	7.7	139.88	1232	0	13.954	By MS/MS	By MS/MS	By MS/MS	By MS/MS	By MS/MS	By MS/MS	By matching	By MS/MS	82291000	59814000	29705000	24841000	35112000	9191000	26796000	29817000
O95251	O95251	2	2	2	Histone acetyltransferase KAT7	KAT7	1	6.4	6.4	6.4	70.642	611	0.00031736	7.3516		By MS/MS	By matching	By MS/MS	By MS/MS	By matching				20637000	27126000	18156000	17092000	22959000
O95260	O95260	3	3	3	Arginyl-tRNA--protein transferase 1	ATE1	1	10.2	10.2	10.2	59.09	518	0	20.156	By MS/MS	By MS/MS	By MS/MS	By MS/MS	By MS/MS	By MS/MS	By MS/MS	By MS/MS	18053000	23291000	15671000	18361000	36244000	31432000	59963000	61435000
O95292	O95292	5	5	5	Vesicle-associated membrane protein-associated protein B/C	VAPB	1	24.7	24.7	24.7	27.228	243	0	9.2689	By MS/MS	By MS/MS	By MS/MS	By MS/MS	By MS/MS	By MS/MS	By MS/MS	By MS/MS	165300000	178800000	133700000	151220000	88608000	148960000	136240000	170430000
O95295	O95295	3	3	3	SNARE-associated protein Snapin	SNAPIN	1	34.6	34.6	34.6	14.874	136	0	39.838	By MS/MS	By MS/MS	By MS/MS	By MS/MS	By MS/MS	By MS/MS	By matching	By MS/MS	77431000	73666000	38968000	19760000	23974000	40423000	39698000	41168000
O95298	O95298	2	2	2	NADH dehydrogenase [ubiquinone] 1 subunit C2	NDUFC2	1	16.8	16.8	16.8	14.187	119	0.00026983	3.7565	By matching	By MS/MS	By matching	By MS/MS	By MS/MS	By matching	By MS/MS	By MS/MS	127380000	163690000	88709000	66249000	106460000	64465000	118730000	136770000
O95299	O95299	8	8	8	NADH dehydrogenase [ubiquinone] 1 alpha subcomplex subunit 10, mitochondrial	NDUFA10	1	25.4	25.4	25.4	40.75	355	0	33.65	By MS/MS	By MS/MS	By MS/MS	By MS/MS	By MS/MS	By MS/MS	By MS/MS	By MS/MS	305790000	438450000	308930000	305870000	385990000	435670000	86856000	422930000
O95336	O95336	13	13	13	6-phosphogluconolactonase	PGLS	1	70.5	70.5	70.5	27.547	258	0	70.107	By MS/MS	By MS/MS	By MS/MS	By MS/MS	By MS/MS	By MS/MS	By MS/MS	By MS/MS	1392800000	1695600000	949580000	996540000	1110200000	1063000000	1326800000	1142100000
O95340	O95340	7	6	6	Bifunctional 3-phosphoadenosine 5-phosphosulfate synthase 2;Sulfate adenylyltransferase;Adenylyl-sulfate kinase	PAPSS2	1	16.4	14.2	14.2	69.5	614	0	9.449	By MS/MS	By MS/MS	By MS/MS	By MS/MS	By MS/MS	By MS/MS	By MS/MS	By MS/MS	248920000	342920000	220290000	218430000	261720000	169880000	161400000	78345000
O95347	O95347	31	31	31	Structural maintenance of chromosomes protein 2	SMC2	1	31.3	31.3	31.3	135.65	1197	0	96.435	By MS/MS	By MS/MS	By MS/MS	By MS/MS	By MS/MS	By MS/MS	By MS/MS	By MS/MS	999230000	1176600000	1000300000	966220000	926810000	761400000	1157600000	1227200000
O95352	O95352	7	7	7	Ubiquitin-like modifier-activating enzyme ATG7	ATG7	1	12.9	12.9	12.9	77.959	703	0	10.844	By MS/MS	By MS/MS	By MS/MS	By MS/MS	By MS/MS	By MS/MS	By MS/MS	By MS/MS	59764000	69932000	63458000	48765000	36272000	47411000	24030000	46998000
O95365	O95365	2	2	2	Zinc finger and BTB domain-containing protein 7A	ZBTB7A	1	5.3	5.3	5.3	61.438	584	0.0036937	2.4048		By matching				By matching	By MS/MS	By MS/MS		8461900				3947700	14507000	21276000
O95372	O95372	9	9	9	Acyl-protein thioesterase 2	LYPLA2	1	54.5	54.5	54.5	24.737	231	0	58.623	By MS/MS	By MS/MS	By MS/MS	By MS/MS	By MS/MS	By MS/MS	By MS/MS	By MS/MS	2469900000	2619200000	1569200000	1565400000	1288100000	1213200000	1700600000	1560700000
O95373	O95373	30	30	29	Importin-7	IPO7	1	37.2	37.2	36.2	119.52	1038	0	323.31	By MS/MS	By MS/MS	By MS/MS	By MS/MS	By MS/MS	By MS/MS	By MS/MS	By MS/MS	3001900000	3576900000	2866000000	2447900000	2715500000	2677100000	3295800000	3871000000
O95376	O95376	3	3	3	E3 ubiquitin-protein ligase ARIH2	ARIH2	1	9.7	9.7	9.7	57.818	493	0.00027716	4.2688	By matching	By MS/MS	By MS/MS	By MS/MS	By matching	By MS/MS	By MS/MS	By MS/MS	17021000	20188000	49066000	55391000	35576000	31343000	70398000	41870000
O95394	O95394	5	5	5	Phosphoacetylglucosamine mutase	PGM3	1	10.7	10.7	10.7	59.851	542	0	14.267	By MS/MS	By MS/MS	By MS/MS	By MS/MS	By MS/MS	By MS/MS	By MS/MS	By MS/MS	88317000	117570000	92888000	43424000	18179000	52716000	77301000	73917000
O95396	O95396	5	5	5	Adenylyltransferase and sulfurtransferase MOCS3;Molybdopterin-synthase adenylyltransferase;Molybdopterin-synthase sulfurtransferase	MOCS3	1	17.2	17.2	17.2	49.669	460	0.00030257	6.14	By MS/MS	By MS/MS	By MS/MS	By MS/MS	By MS/MS	By MS/MS	By MS/MS	By MS/MS	56150000	45735000	37438000	21538000	62905000	57343000	61056000	40162000
O95400	O95400	8	8	8	CD2 antigen cytoplasmic tail-binding protein 2	CD2BP2	1	30.2	30.2	30.2	37.646	341	0	52.634	By MS/MS	By MS/MS	By MS/MS	By MS/MS	By MS/MS	By MS/MS	By MS/MS	By MS/MS	173970000	237220000	246390000	216260000	210200000	185470000	196480000	158050000
O95425	O95425	4	4	4	Supervillin	SVIL	1	3	3	3	247.74	2214	0.00032841	8.2958	By matching	By MS/MS	By MS/MS	By MS/MS	By matching		By matching	By MS/MS	16194000	29470000	19775000	15290000	8484500		2875200	20984000
O95433	O95433	22	22	22	Activator of 90 kDa heat shock protein ATPase homolog 1	AHSA1	1	73.1	73.1	73.1	38.274	338	0	226.36	By MS/MS	By MS/MS	By MS/MS	By MS/MS	By MS/MS	By MS/MS	By MS/MS	By MS/MS	9408700000	10314000000	8214700000	7147800000	2365700000	2466300000	2630100000	2990700000
O95453	O95453	5	5	5	Poly(A)-specific ribonuclease PARN	PARN	1	9.5	9.5	9.5	73.45	639	0	20.018	By MS/MS	By MS/MS	By MS/MS	By MS/MS	By MS/MS	By MS/MS	By MS/MS	By MS/MS	108230000	79964000	49687000	56746000	170660000	217030000	62696000	168760000
O95456	O95456	6	6	6	Proteasome assembly chaperone 1	PSMG1	1	31.6	31.6	31.6	32.854	288	0	31.352	By MS/MS	By MS/MS	By MS/MS	By MS/MS	By MS/MS	By MS/MS	By MS/MS	By MS/MS	260840000	265050000	209860000	168150000	236760000	255060000	283900000	226790000
O95478	O95478	8	8	8	Ribosome biogenesis protein NSA2 homolog	NSA2	1	27.3	27.3	27.3	30.065	260	0	13.766	By MS/MS	By MS/MS	By MS/MS	By MS/MS	By MS/MS	By MS/MS	By MS/MS	By MS/MS	368710000	392380000	312560000	235390000	269550000	278430000	312000000	294520000
O95486	O95486	11	11	10	Protein transport protein Sec24A	SEC24A	1	14.5	14.5	13.6	119.75	1093	0	27.635	By MS/MS	By MS/MS	By MS/MS	By MS/MS	By MS/MS	By MS/MS	By MS/MS	By MS/MS	145690000	270620000	196470000	168900000	249710000	225820000	143520000	210790000
O95487	O95487	10	9	9	Protein transport protein Sec24B	SEC24B	1	8.8	8	8	137.42	1268	0	19.237	By MS/MS	By MS/MS	By MS/MS	By MS/MS	By MS/MS	By MS/MS	By MS/MS	By MS/MS	132680000	162510000	91427000	89994000	129060000	84546000	155690000	158960000
O95563	O95563	2	2	2	Mitochondrial pyruvate carrier 2	MPC2	1	15.7	15.7	15.7	14.279	127	0.00027203	3.9355	By MS/MS	By MS/MS	By MS/MS	By MS/MS	By MS/MS	By MS/MS	By MS/MS	By MS/MS	35999000	29466000	25450000	20523000	18353000	14850000	22469000	48469000
O95571	O95571	9	9	9	Persulfide dioxygenase ETHE1, mitochondrial	ETHE1	1	58.7	58.7	58.7	27.873	254	0	39.998	By MS/MS	By MS/MS	By MS/MS	By MS/MS	By MS/MS	By MS/MS	By MS/MS	By MS/MS	278390000	372200000	274000000	254890000	289210000	435280000	502800000	379650000
O95573	O95573	27	27	25	Long-chain-fatty-acid--CoA ligase 3	ACSL3	1	54.9	54.9	50.8	80.419	720	0	215.98	By MS/MS	By MS/MS	By MS/MS	By MS/MS	By MS/MS	By MS/MS	By MS/MS	By MS/MS	1820700000	2153800000	1632300000	1216300000	1439200000	1158400000	1678000000	1359000000
O95602	O95602	11	11	10	DNA-directed RNA polymerase I subunit RPA1	POLR1A	1	9	9	8.4	194.81	1720	0	22.538	By MS/MS	By MS/MS	By MS/MS	By MS/MS	By MS/MS	By MS/MS	By MS/MS	By MS/MS	127120000	113360000	120190000	65629000	106060000	98255000	161820000	107350000
O95613	O95613	3	3	3	Pericentrin	PCNT	1	1	1	1	378.03	3336	0.0078292	1.9319	By MS/MS	By MS/MS	By matching	By MS/MS	By MS/MS		By matching	By matching	837840000	926660000	19020000	20248000	887560000		1439100000	992290000
O95630	O95630	5	5	5	STAM-binding protein	STAMBP	1	16.7	16.7	16.7	48.076	424	0.00033256	8.7612	By MS/MS	By MS/MS	By MS/MS	By MS/MS	By MS/MS	By MS/MS	By MS/MS	By MS/MS	119820000	108440000	94203000	94670000	85671000	107210000	148500000	82300000
O95674	O95674	2	2	2	Phosphatidate cytidylyltransferase 2	CDS2	1	9	9	9	51.417	445	0	16.411	By MS/MS	By MS/MS	By MS/MS	By MS/MS	By MS/MS	By matching	By MS/MS	By MS/MS	32446000	21522000	17557000	18734000	21392000	23469000	18143000	36620000
O95714;Q9BVR0	O95714	3;1	3;1	3;1	E3 ubiquitin-protein ligase HERC2	HERC2	2	1.3	1.3	1.3	527.22	4834	0.00031211	6.9099	By matching	By MS/MS	By matching	By matching	By matching	By matching	By matching		12816000	32074000	12995000	5306300	1681200	4715500	3230100
O95721	O95721	3	3	3	Synaptosomal-associated protein 29	SNAP29	1	13.6	13.6	13.6	28.97	258	0.0025413	2.8112	By MS/MS	By MS/MS	By matching	By matching				By MS/MS	24438000	94737000	8415900	15239000				6995100
O95747	O95747	14	14	12	Serine/threonine-protein kinase OSR1	OXSR1	1	33.4	33.4	28.7	58.022	527	0	105.87	By MS/MS	By MS/MS	By MS/MS	By MS/MS	By MS/MS	By MS/MS	By MS/MS	By MS/MS	665590000	762290000	388790000	414070000	597320000	529860000	574390000	659930000
O95749	O95749	2	2	2	Geranylgeranyl pyrophosphate synthase	GGPS1	1	7.3	7.3	7.3	34.87	300	0.001821	3.1477			By MS/MS	By matching	By MS/MS	By MS/MS					12644000	10969000	8004700	20040000
O95757	O95757	19	14	14	Heat shock 70 kDa protein 4L	HSPA4L	1	30.3	23.1	23.1	94.511	839	0	50.207	By MS/MS	By MS/MS	By MS/MS	By MS/MS	By MS/MS	By MS/MS	By MS/MS	By MS/MS	219000000	358570000	324170000	238540000	294630000	306510000	226830000	244280000
O95758	O95758	10	6	6	Polypyrimidine tract-binding protein 3	PTBP3	1	23.9	18.1	18.1	59.689	552	0	36.016	By MS/MS	By MS/MS	By MS/MS	By MS/MS	By MS/MS	By MS/MS	By MS/MS	By MS/MS	57622000	69221000	67549000	50103000	12204000	67122000	33163000	57610000
O95777	O95777	6	6	6	U6 snRNA-associated Sm-like protein LSm8	LSM8	1	79.2	79.2	79.2	10.403	96	0	20.206	By MS/MS	By MS/MS	By MS/MS	By MS/MS	By MS/MS	By MS/MS	By MS/MS	By MS/MS	415000000	443510000	369860000	320360000	258030000	242580000	349710000	345180000
O95782	O95782	25	25	17	AP-2 complex subunit alpha-1	AP2A1	1	33.6	33.6	23.6	107.54	977	0	101.32	By MS/MS	By MS/MS	By MS/MS	By MS/MS	By MS/MS	By MS/MS	By MS/MS	By MS/MS	1075900000	1318900000	981850000	928590000	1028300000	1441000000	1101600000	1138600000
O95793	O95793	23	23	23	Double-stranded RNA-binding protein Staufen homolog 1	STAU1	1	48.9	48.9	48.9	63.182	577	0	127.63	By MS/MS	By MS/MS	By MS/MS	By MS/MS	By MS/MS	By MS/MS	By MS/MS	By MS/MS	2293700000	1602300000	1983000000	1852100000	1051200000	1870700000	1140900000	1746400000
O95801	O95801	4	4	4	Tetratricopeptide repeat protein 4	TTC4	1	16	16	16	44.678	387	0.00031908	7.4947	By matching	By MS/MS	By MS/MS	By matching	By MS/MS	By MS/MS	By MS/MS	By MS/MS	48717000	19557000	38411000	12418000	31535000	45482000	22172000	25472000
O95816	O95816	11	11	11	BAG family molecular chaperone regulator 2	BAG2	1	57.8	57.8	57.8	23.772	211	0	59.999	By MS/MS	By MS/MS	By MS/MS	By MS/MS	By MS/MS	By MS/MS	By MS/MS	By MS/MS	838080000	1099500000	702390000	683330000	1117000000	930200000	975250000	816170000
O95817	O95817	20	20	20	BAG family molecular chaperone regulator 3	BAG3	1	54.4	54.4	54.4	61.594	575	0	178.25	By MS/MS	By MS/MS	By MS/MS	By MS/MS	By MS/MS	By MS/MS	By MS/MS	By MS/MS	1404600000	1700000000	1297800000	912880000	844660000	735510000	904570000	1025000000
O95819;Q8N4C8;Q9UKE5	O95819	7;3;3	7;3;3	7;3;3	Mitogen-activated protein kinase kinase kinase kinase 4	MAP4K4	3	10.3	10.3	10.3	142.1	1239	0	20.434	By MS/MS	By MS/MS	By MS/MS	By MS/MS	By MS/MS	By MS/MS	By MS/MS	By MS/MS	146960000	71869000	77325000	38948000	99929000	47065000	53461000	43986000
O95831	O95831	18	18	18	Apoptosis-inducing factor 1, mitochondrial	AIFM1	1	34.1	34.1	34.1	66.9	613	0	90.654	By MS/MS	By MS/MS	By MS/MS	By MS/MS	By MS/MS	By MS/MS	By MS/MS	By MS/MS	1014100000	1073300000	796160000	697870000	731800000	721560000	817540000	751930000
O95834	O95834	3	3	3	Echinoderm microtubule-associated protein-like 2	EML2	1	7.7	7.7	7.7	70.678	649	0	15.344	By MS/MS	By MS/MS	By matching	By MS/MS	By MS/MS	By MS/MS	By MS/MS	By MS/MS	52840000	58733000	20386000	19632000	43782000	21717000	37506000	19506000
O95861	O95861	16	16	16	3(2),5-bisphosphate nucleotidase 1	BPNT1	1	63.3	63.3	63.3	33.392	308	0	82.863	By MS/MS	By MS/MS	By MS/MS	By MS/MS	By MS/MS	By MS/MS	By MS/MS	By MS/MS	1429000000	1416100000	1207600000	1003300000	1041400000	1019200000	1295800000	1232400000
O95881	O95881	6	6	6	Thioredoxin domain-containing protein 12	TXNDC12	1	58.7	58.7	58.7	19.206	172	0	123.22	By MS/MS	By MS/MS	By MS/MS	By MS/MS	By MS/MS	By MS/MS	By MS/MS	By MS/MS	505510000	422970000	501610000	347490000	406570000	424910000	509810000	417960000
O95926	O95926	4	4	4	Pre-mRNA-splicing factor SYF2	SYF2	1	34.2	34.2	34.2	28.722	243	0	28.605	By MS/MS	By MS/MS	By MS/MS	By MS/MS	By MS/MS	By MS/MS	By MS/MS	By MS/MS	81803000	143990000	115690000	86466000	33337000	61388000	10399000	33965000
O95983	O95983	3	3	3	Methyl-CpG-binding domain protein 3	MBD3	1	13.7	13.7	13.7	32.844	291	0	32.63	By MS/MS	By MS/MS	By MS/MS	By matching	By MS/MS	By MS/MS	By MS/MS	By matching	23621000	54208000	49447000	54500000	84824000	49076000	90529000	42584000
O95999	O95999	3	3	3	B-cell lymphoma/leukemia 10	BCL10	1	11.6	11.6	11.6	26.251	233	0.00027816	4.3348	By MS/MS	By MS/MS	By MS/MS	By MS/MS	By matching		By matching	By MS/MS	29781000	94845000	84867000	64232000	11106000		11158000	27097000
O96000	O96000	8	8	8	NADH dehydrogenase [ubiquinone] 1 beta subcomplex subunit 10	NDUFB10	1	58.1	58.1	58.1	20.776	172	0	35.163	By MS/MS	By MS/MS	By MS/MS	By MS/MS	By MS/MS	By MS/MS	By MS/MS	By MS/MS	360450000	334550000	413570000	253120000	230270000	190180000	365020000	242660000
O96005	O96005	6	6	6	Cleft lip and palate transmembrane protein 1	CLPTM1	1	16.7	16.7	16.7	76.096	669	0	26.478	By MS/MS	By MS/MS	By MS/MS	By MS/MS	By MS/MS	By MS/MS	By MS/MS	By MS/MS	74572000	219520000	153510000	37157000	129190000	95131000	105500000	62705000
O96007	O96007	2	2	2	Molybdopterin synthase catalytic subunit	MOCS2	1	18.6	18.6	18.6	20.944	188	0.00032787	8.2693	By matching	By matching	By MS/MS	By MS/MS	By matching	By matching	By matching		15793000	156700000	19681000	128100000	12578000	16183000	18156000
O96008	O96008	13	13	13	Mitochondrial import receptor subunit TOM40 homolog	TOMM40	1	56.2	56.2	56.2	37.893	361	0	244.51	By MS/MS	By MS/MS	By MS/MS	By MS/MS	By MS/MS	By MS/MS	By MS/MS	By MS/MS	1436000000	2107900000	1440500000	1215300000	1500400000	1712700000	2007600000	1440600000
O96011	O96011	4	4	4	Peroxisomal membrane protein 11B	PEX11B	1	17	17	17	28.431	259	0.00030798	6.5334	By MS/MS	By MS/MS	By MS/MS	By MS/MS	By matching	By matching	By MS/MS	By MS/MS	636470000	745160000	520370000	23328000	435990000	476690000	558930000	474970000
O96013;Q9P286;Q9NQU5	O96013	9;2;1	9;2;1	9;2;1	Serine/threonine-protein kinase PAK 4	PAK4	3	26.2	26.2	26.2	64.071	591	0	93.901	By MS/MS	By MS/MS	By MS/MS	By MS/MS	By MS/MS	By MS/MS	By MS/MS	By MS/MS	121540000	119430000	77028000	76094000	83042000	55756000	91916000	304600000
O96019;O94805	O96019	12;1	12;1	12;1	Actin-like protein 6A	ACTL6A	2	40.8	40.8	40.8	47.46	429	0	93.243	By MS/MS	By MS/MS	By MS/MS	By MS/MS	By MS/MS	By MS/MS	By MS/MS	By MS/MS	735100000	781040000	646760000	568070000	543970000	622690000	487910000	653470000
O96028	O96028	4	4	4	Histone-lysine N-methyltransferase NSD2	WHSC1	1	4.4	4.4	4.4	152.26	1365	0	10.457	By MS/MS	By MS/MS	By MS/MS	By MS/MS	By MS/MS	By matching	By MS/MS		36149000	48215000	27208000	25060000	8109700	11474000	18175000
P00167	P00167	2	2	2	Cytochrome b5	CYB5A	1	16.4	16.4	16.4	15.33	134	0.0057485	2.0911	By matching	By MS/MS	By MS/MS	By MS/MS	By MS/MS	By MS/MS	By MS/MS	By MS/MS	27900000	57787000	36226000	58776000	57500000	68526000	57700000	94222000
P00338;Q6ZMR3;P07864	P00338	26;1;1	26;1;1	25;0;0	L-lactate dehydrogenase A chain	LDHA	3	75	75	71.4	36.688	332	0	323.31	By MS/MS	By MS/MS	By MS/MS	By MS/MS	By MS/MS	By MS/MS	By MS/MS	By MS/MS	35882000000	39711000000	31790000000	28699000000	29754000000	28062000000	36235000000	33313000000
P00367;P49448	P00367;P49448	29;20	29;20	29;20	Glutamate dehydrogenase 1, mitochondrial;Glutamate dehydrogenase 2, mitochondrial	GLUD1;GLUD2	2	60.9	60.9	60.9	61.397	558	0	165.84	By MS/MS	By MS/MS	By MS/MS	By MS/MS	By MS/MS	By MS/MS	By MS/MS	By MS/MS	3309000000	3415400000	2786700000	2286400000	2371100000	2505900000	3369900000	3028400000
P00374;Q86XF0	P00374	7;2	7;2	7;2	Dihydrofolate reductase	DHFR	2	45.5	45.5	45.5	21.452	187	0	27.672	By MS/MS	By MS/MS	By MS/MS	By MS/MS	By MS/MS	By MS/MS	By MS/MS	By MS/MS	233250000	336610000	195470000	139150000	58222000	57395000	90426000	28099000
P00387	P00387	16	16	16	NADH-cytochrome b5 reductase 3;NADH-cytochrome b5 reductase 3 membrane-bound form;NADH-cytochrome b5 reductase 3 soluble form	CYB5R3	1	75.1	75.1	75.1	34.234	301	0	143.93	By MS/MS	By MS/MS	By MS/MS	By MS/MS	By MS/MS	By MS/MS	By MS/MS	By MS/MS	870830000	1304000000	1127900000	759650000	1007200000	783430000	748210000	929540000
P00390	P00390	17	17	17	Glutathione reductase, mitochondrial	GSR	1	56.3	56.3	56.3	56.256	522	0	97.443	By MS/MS	By MS/MS	By MS/MS	By MS/MS	By MS/MS	By MS/MS	By MS/MS	By MS/MS	716800000	784680000	498080000	622540000	672120000	748660000	766730000	774260000
P00403	P00403	6	6	6	Cytochrome c oxidase subunit 2	MT-CO2	1	44.9	44.9	44.9	25.565	227	0	83.147	By MS/MS	By MS/MS	By MS/MS	By MS/MS	By MS/MS	By MS/MS	By MS/MS	By MS/MS	493940000	521330000	364710000	236090000	376580000	325830000	845480000	725960000
P00414	P00414	2	2	2	Cytochrome c oxidase subunit 3	MT-CO3	1	9.6	9.6	9.6	29.95	261	0.000306	6.3852	By MS/MS	By MS/MS	By MS/MS	By MS/MS	By matching			By MS/MS	56895000	63459000	69864000	33568000	22830000			33397000
P00441	P00441	10	10	10	Superoxide dismutase [Cu-Zn]	SOD1	1	84.4	84.4	84.4	15.936	154	0	323.31	By MS/MS	By MS/MS	By MS/MS	By MS/MS	By MS/MS	By MS/MS	By MS/MS	By MS/MS	8066400000	7877800000	6429200000	6067300000	6268800000	6584100000	7864400000	7677700000
P00491	P00491	20	20	20	Purine nucleoside phosphorylase	PNP	1	80.3	80.3	80.3	32.118	289	0	244.18	By MS/MS	By MS/MS	By MS/MS	By MS/MS	By MS/MS	By MS/MS	By MS/MS	By MS/MS	2187500000	2537800000	2028300000	1878600000	2118300000	2145500000	2561100000	2391000000
P00492;Q9NRG1	P00492	11;1	11;1	11;1	Hypoxanthine-guanine phosphoribosyltransferase	HPRT1	2	65.6	65.6	65.6	24.579	218	0	131.06	By MS/MS	By MS/MS	By MS/MS	By MS/MS	By MS/MS	By MS/MS	By MS/MS	By MS/MS	1489700000	1659800000	1355100000	1093000000	1268700000	1140500000	1238900000	1221900000
P00505	P00505	20	20	20	Aspartate aminotransferase, mitochondrial	GOT2	1	58.4	58.4	58.4	47.517	430	0	199.68	By MS/MS	By MS/MS	By MS/MS	By MS/MS	By MS/MS	By MS/MS	By MS/MS	By MS/MS	4072000000	4435700000	3789300000	2958800000	2974000000	3307400000	4170500000	4139600000
P00533	P00533	8	8	8	Epidermal growth factor receptor	EGFR	1	7.9	7.9	7.9	134.28	1210	0	15.459	By MS/MS	By MS/MS	By MS/MS	By MS/MS	By MS/MS	By MS/MS	By MS/MS	By MS/MS	84988000	124000000	95740000	83061000	87124000	103200000	73933000	77397000
P00558;P07205	P00558	39;7	39;7	39;7	Phosphoglycerate kinase 1	PGK1	2	85.6	85.6	85.6	44.614	417	0	323.31	By MS/MS	By MS/MS	By MS/MS	By MS/MS	By MS/MS	By MS/MS	By MS/MS	By MS/MS	27195000000	28970000000	25073000000	21081000000	22091000000	25606000000	26716000000	26933000000
P00568;Q9Y6K8	P00568	11;1	11;1	11;1	Adenylate kinase isoenzyme 1	AK1	2	51	51	51	21.635	194	0	32.691	By MS/MS	By MS/MS	By MS/MS	By MS/MS	By MS/MS	By MS/MS	By MS/MS	By MS/MS	921270000	858120000	876550000	665190000	625450000	731180000	899250000	696670000
P01116;P01112	P01116;P01112	5;4	5;4	2;1	GTPase KRas;GTPase KRas, N-terminally processed;GTPase HRas;GTPase HRas, N-terminally processed	KRAS;HRAS	2	32.3	32.3	12.7	21.656	189	0	34.543	By MS/MS	By MS/MS	By MS/MS	By MS/MS	By MS/MS	By MS/MS	By MS/MS	By MS/MS	207060000	221390000	140110000	150420000	152480000	160060000	159130000	183060000
P01130	P01130	7	7	7	Low-density lipoprotein receptor	LDLR	1	10.8	10.8	10.8	95.375	860	0	15.499	By MS/MS	By MS/MS	By MS/MS	By MS/MS	By MS/MS	By MS/MS	By MS/MS	By MS/MS	132510000	223920000	153800000	73119000	102200000	119530000	174300000	146710000
P01892;P30511	P01892	19;1	19;1	0;0	HLA class I histocompatibility antigen, A-2 alpha chain	HLA-A	2	63	63	0	40.921	365	0	321.52	By MS/MS	By MS/MS	By MS/MS	By MS/MS	By MS/MS	By MS/MS	By MS/MS	By MS/MS	722790000	821360000	666960000	504230000	3700400000	3453000000	4525700000	4311900000
P01903;P01906	P01903	8;1	8;1	8;1	HLA class II histocompatibility antigen, DR alpha chain	HLA-DRA	2	26	26	26	28.607	254	0	81.455	By MS/MS	By MS/MS	By MS/MS	By MS/MS	By MS/MS	By MS/MS	By MS/MS	By MS/MS	342200000	254010000	180640000	120320000	1076800000	1262900000	1191800000	1364400000
P02462	P02462	2	2	2	Collagen alpha-1(IV) chain;Arresten	COL4A1	1	1.9	1.9	1.9	160.61	1669	0.00032712	8.2187	By MS/MS	By MS/MS	By MS/MS						18583000	31987000	15152000
P02533;Q04695;P08779	P02533;Q04695;P08779	6;5;5	2;2;1	1;1;0	Keratin, type I cytoskeletal 14;Keratin, type I cytoskeletal 17;Keratin, type I cytoskeletal 16	KRT14;KRT17;KRT16	3	10	4.7	2.8	51.561	472	0.00029985	5.9548	By matching	By MS/MS	By MS/MS	By MS/MS	By matching	By MS/MS	By MS/MS	By MS/MS		13767000	29612000	16644000			53049000
P02545;REV__Q5VX52	P02545	76;1	76;1	74;1	Prelamin-A/C;Lamin-A/C	LMNA	2	82.4	82.4	82.4	74.139	664	0	323.31	By MS/MS	By MS/MS	By MS/MS	By MS/MS	By MS/MS	By MS/MS	By MS/MS	By MS/MS	69549000000	76257000000	63637000000	57772000000	59373000000	64184000000	77748000000	65742000000
P02765	P02765	3	3	3	Alpha-2-HS-glycoprotein;Alpha-2-HS-glycoprotein chain A;Alpha-2-HS-glycoprotein chain B	AHSG	1	5.4	5.4	5.4	39.324	367	0	22.132	By MS/MS	By MS/MS	By MS/MS	By MS/MS	By MS/MS	By MS/MS	By MS/MS	By MS/MS	547670000	629540000	430320000	468770000	644990000	573090000	569270000	540940000
P02768	P02768	5	5	5	Serum albumin	ALB	1	8.2	8.2	8.2	69.366	609	0	14.36	By MS/MS	By MS/MS	By MS/MS	By MS/MS	By MS/MS	By MS/MS	By MS/MS	By MS/MS	1746300000	1747600000	1133300000	1357500000	1457700000	1868600000	1872500000	1294000000
P02786	P02786	28	28	28	Transferrin receptor protein 1;Transferrin receptor protein 1, serum form	TFRC	1	42.8	42.8	42.8	84.87	760	0	287.19	By MS/MS	By MS/MS	By MS/MS	By MS/MS	By MS/MS	By MS/MS	By MS/MS	By MS/MS	2645600000	3071100000	2505100000	1724300000	1813900000	1603000000	1827900000	2024400000
P02788	P02788	2	2	2	Lactotransferrin;Lactoferricin-H;Kaliocin-1;Lactoferroxin-A;Lactoferroxin-B;Lactoferroxin-C	LTF	1	3	3	3	78.181	710	0.00026947	3.7443	By matching	By MS/MS	By MS/MS	By MS/MS	By MS/MS	By MS/MS	By MS/MS	By matching	63853000	59093000	49423000	51386000	43029000	51017000	69728000	36584000
P02794	P02794	8	8	8	Ferritin heavy chain;Ferritin heavy chain, N-terminally processed	FTH1	1	60.7	60.7	60.7	21.225	183	0	16.789	By MS/MS	By matching	By MS/MS	By MS/MS	By MS/MS	By MS/MS	By MS/MS	By MS/MS	223970000	198760000	134890000	148420000	223590000	245180000	287310000	248450000
P02795;P80297;P13640;Q8N339;P04732;P80294;P04731	P02795;P80297;P13640;Q8N339;P04732	4;3;3;2;2;1;1	4;3;3;2;2;1;1	4;3;3;2;2;1;1	Metallothionein-2;Metallothionein-1X;Metallothionein-1G;Metallothionein-1M;Metallothionein-1E	MT2A;MT1X;MT1G;MT1M;MT1E	7	67.2	67.2	67.2	6.0422	61	0	74.368	By MS/MS	By MS/MS	By MS/MS	By MS/MS	By MS/MS	By MS/MS	By MS/MS	By MS/MS	4059300000	4135500000	3628200000	3213500000	5514200000	5054000000	5037300000	5677800000
P03886	P03886	2	2	2	NADH-ubiquinone oxidoreductase chain 1	MT-ND1	1	8.8	8.8	8.8	35.66	318	0.00053121	3.5352	By MS/MS	By MS/MS	By MS/MS	By MS/MS	By MS/MS	By MS/MS	By matching	By MS/MS	45733000	114390000	40942000	30456000	54153000	52208000	58220000	68411000
P03905	P03905	3	3	3	NADH-ubiquinone oxidoreductase chain 4	MT-ND4	1	8.3	8.3	8.3	51.58	459	0.0003123	6.9138	By MS/MS	By MS/MS	By MS/MS	By MS/MS	By MS/MS	By matching	By matching	By MS/MS	9311300	41258000	25790000	11122000	10598000	2680800	1544300	4520400
P03915	P03915	3	3	3	NADH-ubiquinone oxidoreductase chain 5	MT-ND5	1	8	8	8	67.026	603	0.0020523	2.9166	By matching	By matching	By MS/MS		By matching	By matching		By MS/MS	22715000	17374000	16257000		12003000	25434000		35667000
P03928	P03928	2	2	2	ATP synthase protein 8	MT-ATP8	1	29.4	29.4	29.4	7.9916	68	0.00027863	4.3484	By MS/MS	By MS/MS	By MS/MS	By MS/MS	By MS/MS	By MS/MS	By MS/MS	By MS/MS	73619000	111600000	123840000	96014000	89280000	102530000	118210000	117460000
P04040	P04040	16	16	16	Catalase	CAT	1	35.1	35.1	35.1	59.755	527	0	75.277	By MS/MS	By MS/MS	By MS/MS	By MS/MS	By MS/MS	By MS/MS	By MS/MS	By MS/MS	912490000	910810000	917860000	877260000	429510000	405210000	560240000	450980000
P04062	P04062	5	5	5	Glucosylceramidase	GBA	1	9.3	9.3	9.3	59.716	536	0.00053277	3.5561	By MS/MS	By MS/MS	By MS/MS	By MS/MS	By matching	By MS/MS	By matching	By MS/MS	284100000	58356000	49178000	235710000	80978000	262820000	60932000	73773000
P04075;P05062	P04075	36;1	36;1	29;0	Fructose-bisphosphate aldolase A	ALDOA	2	87.4	87.4	73.6	39.42	364	0	323.31	By MS/MS	By MS/MS	By MS/MS	By MS/MS	By MS/MS	By MS/MS	By MS/MS	By MS/MS	49904000000	53640000000	42711000000	39518000000	40216000000	39863000000	45092000000	42652000000
P04080	P04080	5	5	5	Cystatin-B	CSTB	1	79.6	79.6	79.6	11.139	98	0	67.691	By MS/MS	By MS/MS	By MS/MS	By MS/MS	By MS/MS	By MS/MS	By MS/MS	By MS/MS	929690000	911780000	519370000	709370000	617060000	1091000000	1115300000	653610000
P04083	P04083	33	33	33	Annexin A1	ANXA1	1	78.9	78.9	78.9	38.714	346	0	323.31	By MS/MS	By MS/MS	By MS/MS	By MS/MS	By MS/MS	By MS/MS	By MS/MS	By MS/MS	50799000000	51338000000	45832000000	40404000000	49721000000	60115000000	63024000000	49319000000
P04114	P04114	6	6	6	Apolipoprotein B-100;Apolipoprotein B-48	APOB	1	1.2	1.2	1.2	515.6	4563	0	12.966	By matching	By matching	By matching	By matching	By MS/MS	By MS/MS	By MS/MS	By MS/MS	8070900	10788000	20509000	18139000	167680000	181660000	244190000	163380000
P04150	P04150	4	4	4	Glucocorticoid receptor	NR3C1	1	8.6	8.6	8.6	85.658	777	0	12.178		By MS/MS	By MS/MS	By matching	By MS/MS		By MS/MS	By MS/MS		57648000	8214100	10664000	10335000		20768000	28303000
P04156	P04156	3	3	3	Major prion protein	PRNP	1	12.6	12.6	12.6	27.661	253	0	14.899	By MS/MS	By MS/MS	By MS/MS	By MS/MS	By MS/MS	By MS/MS	By MS/MS	By MS/MS	237560000	251460000	241490000	164880000	215570000	235440000	217360000	247550000
P04179	P04179	6	6	6	Superoxide dismutase [Mn], mitochondrial	SOD2	1	30.6	30.6	30.6	24.722	222	0	13.379	By matching	By matching	By MS/MS	By matching	By MS/MS	By MS/MS	By MS/MS	By MS/MS	49918000	32538000	6514600	37598000	117550000	148900000	183030000	206070000
P04181	P04181	19	19	19	Ornithine aminotransferase, mitochondrial;Ornithine aminotransferase, hepatic form;Ornithine aminotransferase, renal form	OAT	1	61.5	61.5	61.5	48.534	439	0	143.28	By MS/MS	By MS/MS	By MS/MS	By MS/MS	By MS/MS	By MS/MS	By MS/MS	By MS/MS	2133600000	2647000000	1927200000	1494100000	896390000	954760000	1487600000	1060000000
P04183	P04183	8	8	8	Thymidine kinase, cytosolic	TK1	1	46.2	46.2	46.2	25.468	234	0	21.913	By MS/MS	By MS/MS	By MS/MS	By MS/MS	By MS/MS	By MS/MS	By MS/MS	By MS/MS	366140000	468680000	384880000	386050000	74948000	141190000	172030000	118660000
P04233	P04233	5	5	5	HLA class II histocompatibility antigen gamma chain	CD74	1	19.9	19.9	19.9	33.515	296	0	51.217	By MS/MS	By MS/MS	By MS/MS	By MS/MS	By MS/MS	By MS/MS	By MS/MS	By MS/MS	165810000	125260000	103620000	78456000	311440000	376540000	314540000	472510000
P04264	P04264	34	32	29	Keratin, type II cytoskeletal 1	KRT1	1	57.9	56.4	51.7	66.038	644	0	323.31	By MS/MS	By MS/MS	By MS/MS	By MS/MS	By MS/MS	By MS/MS	By MS/MS	By MS/MS	795910000	1975800000	4649600000	2565900000	926320000	1115100000	7259200000	2499900000
P04406	P04406	27	27	26	Glyceraldehyde-3-phosphate dehydrogenase	GAPDH	1	90.7	90.7	88.7	36.053	335	0	323.31	By MS/MS	By MS/MS	By MS/MS	By MS/MS	By MS/MS	By MS/MS	By MS/MS	By MS/MS	168520000000	204860000000	156050000000	160880000000	166140000000	185670000000	184350000000	145650000000
P04439	P04439	16	7	0	HLA class I histocompatibility antigen, A-3 alpha chain	HLA-A	1	54.8	25.8	0	40.84	365	0	90.286	By MS/MS	By MS/MS	By MS/MS	By MS/MS	By MS/MS	By MS/MS	By MS/MS	By MS/MS	80636000	152370000	96555000	28124000	474930000	350720000	477880000	416850000
P04440	P04440	4	4	3	HLA class II histocompatibility antigen, DP beta 1 chain	HLA-DPB1	1	22.1	22.1	18.6	29.159	258	0	9.7407					By MS/MS	By MS/MS	By MS/MS	By MS/MS					92353000	187290000	184870000	206970000
P04632;Q96L46	P04632	13;2	13;2	13;2	Calpain small subunit 1	CAPNS1	2	78	78	78	28.315	268	0	272.72	By MS/MS	By MS/MS	By MS/MS	By MS/MS	By MS/MS	By MS/MS	By MS/MS	By MS/MS	3352500000	3100100000	2748800000	2586800000	2163300000	2339900000	2928800000	3049800000
P04792	P04792	21	21	21	Heat shock protein beta-1	HSPB1	1	90.7	90.7	90.7	22.782	205	0	323.31	By MS/MS	By MS/MS	By MS/MS	By MS/MS	By MS/MS	By MS/MS	By MS/MS	By MS/MS	4974800000	5428500000	4590100000	3429900000	2036000000	2068400000	2751700000	2485800000
P04818	P04818	8	8	8	Thymidylate synthase	TYMS	1	35.1	35.1	35.1	35.716	313	0	83.928	By MS/MS	By MS/MS	By MS/MS	By MS/MS	By MS/MS	By MS/MS	By MS/MS	By MS/MS	553330000	650370000	541740000	520480000	117810000	116010000	132580000	110000000
P04843	P04843	27	27	27	Dolichyl-diphosphooligosaccharide--protein glycosyltransferase subunit 1	RPN1	1	54	54	54	68.569	607	0	170.69	By MS/MS	By MS/MS	By MS/MS	By MS/MS	By MS/MS	By MS/MS	By MS/MS	By MS/MS	3051600000	3666500000	2725200000	2146400000	2870100000	2484500000	3463200000	2941000000
P04844	P04844	22	22	22	Dolichyl-diphosphooligosaccharide--protein glycosyltransferase subunit 2	RPN2	1	52.9	52.9	52.9	69.283	631	0	313.62	By MS/MS	By MS/MS	By MS/MS	By MS/MS	By MS/MS	By MS/MS	By MS/MS	By MS/MS	3715100000	4736100000	3477300000	2941600000	3739400000	3315100000	3472000000	3150200000
P04899;P63096	P04899	18;7	18;7	12;1	Guanine nucleotide-binding protein G(i) subunit alpha-2	GNAI2	2	58.3	58.3	41.1	40.45	355	0	141.06	By MS/MS	By MS/MS	By MS/MS	By MS/MS	By MS/MS	By MS/MS	By MS/MS	By MS/MS	2219100000	2489000000	2120300000	1640000000	1975100000	1844400000	2141700000	2039300000
P05023;P13637;Q13733;P20648	P05023	47;16;8;4	47;16;8;4	32;3;0;0	Sodium/potassium-transporting ATPase subunit alpha-1	ATP1A1	4	49.2	49.2	32.8	112.89	1023	0	323.31	By MS/MS	By MS/MS	By MS/MS	By MS/MS	By MS/MS	By MS/MS	By MS/MS	By MS/MS	7257800000	7716900000	6342400000	5306500000	5219200000	5128300000	6680300000	6106500000
P05026	P05026	8	8	8	Sodium/potassium-transporting ATPase subunit beta-1	ATP1B1	1	34.7	34.7	34.7	35.061	303	0	40.961	By MS/MS	By MS/MS	By MS/MS	By MS/MS	By MS/MS	By MS/MS	By MS/MS	By MS/MS	235040000	335240000	290000000	234980000	352610000	276870000	411130000	312860000
P05091	P05091	7	6	6	Aldehyde dehydrogenase, mitochondrial	ALDH2	1	19.5	18	18	56.381	517	0	18.566	By MS/MS	By MS/MS	By MS/MS	By MS/MS	By matching	By MS/MS	By matching	By MS/MS	153390000	173360000	84534000	119360000	59388000	104780000	99434000	70100000
P05106	P05106	5	5	5	Integrin beta-3	ITGB3	1	8.2	8.2	8.2	87.057	788	0	9.0777	By MS/MS	By MS/MS	By MS/MS	By MS/MS	By MS/MS		By matching	By MS/MS	41148000	64897000	26494000	9574900			23974000	15637000
P05114	P05114	2	2	2	Non-histone chromosomal protein HMG-14	HMGN1	1	47	47	47	10.659	100	0	14.675	By MS/MS	By MS/MS	By MS/MS	By MS/MS	By MS/MS	By MS/MS	By MS/MS	By MS/MS	596340000	571780000	508130000	342070000	431320000	354520000	566630000	528270000
P05141;Q9H0C2	P05141	18;4	6;0	6;0	ADP/ATP translocase 2;ADP/ATP translocase 2, N-terminally processed	SLC25A5	2	47	19.5	19.5	32.852	298	0	35.526	By MS/MS	By MS/MS	By MS/MS	By MS/MS	By MS/MS	By MS/MS	By MS/MS	By MS/MS	3164900000	3931700000	3165200000	2550300000	2768200000	2830200000	3445900000	3131400000
P05161	P05161	2	2	2	Ubiquitin-like protein ISG15	ISG15	1	9.7	9.7	9.7	17.887	165	0.0055556	2.1575		By matching	By matching	By matching	By MS/MS	By MS/MS	By MS/MS	By MS/MS		20061000	42430000	22616000	136200000	116750000	175580000	138520000
P05166	P05166	3	3	3	Propionyl-CoA carboxylase beta chain, mitochondrial	PCCB	1	7.1	7.1	7.1	58.215	539	0	9.749			By MS/MS	By MS/MS		By MS/MS	By MS/MS	By MS/MS			174690000	6091000
P05187;P10696;P09923	P05187;P10696	6;5;1	6;5;1	6;5;1	Alkaline phosphatase, placental type;Alkaline phosphatase, placental-like	ALPP;ALPPL2	3	16.8	16.8	16.8	57.953	535	0	16.052	By MS/MS	By MS/MS	By MS/MS	By MS/MS	By MS/MS	By matching		By MS/MS	51176000	83881000	113640000	48318000	27635000	9027500		12419000
P05198	P05198	28	28	28	Eukaryotic translation initiation factor 2 subunit 1	EIF2S1	1	78.7	78.7	78.7	36.112	315	0	323.31	By MS/MS	By MS/MS	By MS/MS	By MS/MS	By MS/MS	By MS/MS	By MS/MS	By MS/MS	3480600000	4126100000	2990300000	2845800000	3511100000	3007300000	4379400000	3811300000
P05204	P05204	7	7	4	Non-histone chromosomal protein HMG-17	HMGN2	1	60	60	46.7	9.3926	90	0	36.171	By MS/MS	By MS/MS	By MS/MS	By MS/MS	By MS/MS	By MS/MS	By MS/MS	By MS/MS	8829400000	6897000000	5749200000	6094700000	5066200000	6453100000	4364500000	5911900000
P05362	P05362	15	15	15	Intercellular adhesion molecule 1	ICAM1	1	35	35	35	57.825	532	0	95.787	By matching	By matching	By matching	By MS/MS	By MS/MS	By MS/MS	By MS/MS	By MS/MS	61032000	31430000	38001000	23947000	1068100000	1064000000	1216500000	1182000000
P05386	P05386	4	4	4	60S acidic ribosomal protein P1	RPLP1	1	79.8	79.8	79.8	11.514	114	0	323.31	By MS/MS	By MS/MS	By MS/MS	By MS/MS	By MS/MS	By MS/MS	By MS/MS	By MS/MS	8046700000	7895100000	5418600000	5586500000	6228300000	5898500000	8208300000	7321500000
P05387	P05387	9	9	9	60S acidic ribosomal protein P2	RPLP2	1	80.9	80.9	80.9	11.665	115	0	323.31	By MS/MS	By MS/MS	By MS/MS	By MS/MS	By MS/MS	By MS/MS	By MS/MS	By MS/MS	11727000000	13234000000	10957000000	9103500000	11795000000	12252000000	12543000000	12376000000
P05388;Q8NHW5	P05388;Q8NHW5	19;11	19;11	19;11	60S acidic ribosomal protein P0;60S acidic ribosomal protein P0-like	RPLP0;RPLP0P6	2	61.2	61.2	61.2	34.273	317	0	285.75	By MS/MS	By MS/MS	By MS/MS	By MS/MS	By MS/MS	By MS/MS	By MS/MS	By MS/MS	10924000000	12054000000	9932800000	8207900000	9910800000	9237400000	10824000000	10955000000
P05412	P05412	3	2	2	Transcription factor AP-1	JUN	1	11.2	8.8	8.8	35.675	331	0	9.4419	By matching	By matching	By matching	By matching	By MS/MS	By MS/MS	By MS/MS	By MS/MS					42265000	51044000	73127000	57611000
P05423	P05423	4	4	4	DNA-directed RNA polymerase III subunit RPC4	POLR3D	1	14.3	14.3	14.3	44.395	398	0	34.423	By MS/MS	By MS/MS	By MS/MS	By MS/MS	By MS/MS	By MS/MS	By MS/MS	By MS/MS	45605000	32936000	24499000	37191000	8370800	30566000	38358000	8102500
P05455	P05455	20	20	20	Lupus La protein	SSB	1	53.7	53.7	53.7	46.836	408	0	103.36	By MS/MS	By MS/MS	By MS/MS	By MS/MS	By MS/MS	By MS/MS	By MS/MS	By MS/MS	1482700000	1703200000	1436800000	1451200000	1359600000	1724500000	1461500000	1817900000
P05556	P05556	17	17	17	Integrin beta-1	ITGB1	1	27.9	27.9	27.9	88.414	798	0	117.02	By MS/MS	By MS/MS	By MS/MS	By MS/MS	By MS/MS	By MS/MS	By MS/MS	By MS/MS	1287200000	1400800000	1057700000	896980000	1000400000	879900000	1216400000	1157500000
P05783;Q92764	P05783	30;2	30;2	28;1	Keratin, type I cytoskeletal 18	KRT18	2	69.8	69.8	66	48.057	430	0	323.31	By MS/MS	By MS/MS	By MS/MS	By MS/MS	By MS/MS	By MS/MS	By MS/MS	By MS/MS	4523600000	6119300000	4105200000	4198200000	3621800000	2705200000	3039800000	3034600000
P05787;P08729;Q9NSB2	P05787	35;5;4	32;2;2	26;0;0	Keratin, type II cytoskeletal 8	KRT8	3	57.1	56.9	49.7	53.704	483	0	134.19	By MS/MS	By MS/MS	By MS/MS	By MS/MS	By MS/MS	By MS/MS	By MS/MS	By MS/MS	2360000000	2906600000	2510600000	2240400000	1684900000	2177100000	2322900000	2030600000
P06132	P06132	11	11	11	Uroporphyrinogen decarboxylase	UROD	1	37.9	37.9	37.9	40.786	367	0	75.163	By MS/MS	By MS/MS	By MS/MS	By MS/MS	By MS/MS	By MS/MS	By MS/MS	By MS/MS	518670000	757270000	504360000	352050000	386590000	522560000	464680000	497340000
P06396;REV__Q6TDU7	P06396	27;1	27;1	27;1	Gelsolin	GSN	2	41.9	41.9	41.9	85.696	782	0	323.31	By MS/MS	By MS/MS	By MS/MS	By MS/MS	By MS/MS	By MS/MS	By MS/MS	By MS/MS	2724600000	3191000000	2540300000	2193400000	1584300000	1757100000	1705100000	1706800000
P06400	P06400	10	10	10	Retinoblastoma-associated protein	RB1	1	13	13	13	106.16	928	0	72.492	By MS/MS	By MS/MS	By MS/MS	By MS/MS	By MS/MS	By MS/MS	By MS/MS	By MS/MS	170440000	270220000	301170000	148470000	201690000	211420000	115620000	214520000
P06454	P06454	9	9	9	Prothymosin alpha;Prothymosin alpha, N-terminally processed;Thymosin alpha-1	PTMA	1	42.3	42.3	42.3	12.203	111	0	163.93	By MS/MS	By MS/MS	By MS/MS	By MS/MS	By MS/MS	By MS/MS	By MS/MS	By MS/MS	7763400000	8151500000	7451900000	6642800000	6949400000	5959600000	6897000000	7331000000
P06493	P06493	16	16	14	Cyclin-dependent kinase 1	CDK1	1	65	65	58.6	34.095	297	0	139.82	By MS/MS	By MS/MS	By MS/MS	By MS/MS	By MS/MS	By MS/MS	By MS/MS	By MS/MS	1790900000	1938700000	1567900000	1311900000	933920000	918100000	1113500000	1076700000
P06576	P06576	28	28	28	ATP synthase subunit beta, mitochondrial	ATP5B	1	75.4	75.4	75.4	56.559	529	0	323.31	By MS/MS	By MS/MS	By MS/MS	By MS/MS	By MS/MS	By MS/MS	By MS/MS	By MS/MS	17709000000	18493000000	14026000000	12538000000	14178000000	16139000000	18208000000	17481000000
P06703	P06703	14	14	14	Protein S100-A6	S100A6	1	100	100	100	10.18	90	0	122.63	By MS/MS	By MS/MS	By MS/MS	By MS/MS	By MS/MS	By MS/MS	By MS/MS	By MS/MS	46705000000	46267000000	35566000000	37781000000	26765000000	37203000000	28671000000	30343000000
P06730;A6NMX2	P06730	8;1	8;1	8;1	Eukaryotic translation initiation factor 4E	EIF4E	2	43.3	43.3	43.3	25.097	217	0	67.089	By MS/MS	By MS/MS	By MS/MS	By MS/MS	By MS/MS	By MS/MS	By MS/MS	By MS/MS	573330000	901800000	564590000	342650000	544030000	201600000	587820000	589550000
P06733	P06733	39	39	35	Alpha-enolase	ENO1	1	73.3	73.3	64.3	47.168	434	0	323.31	By MS/MS	By MS/MS	By MS/MS	By MS/MS	By MS/MS	By MS/MS	By MS/MS	By MS/MS	103000000000	100470000000	81315000000	78018000000	94418000000	98215000000	113860000000	100970000000
P06737	P06737	27	20	19	Glycogen phosphorylase, liver form	PYGL	1	39.6	29.9	28.6	97.147	847	0	98.055	By MS/MS	By MS/MS	By MS/MS	By MS/MS	By MS/MS	By MS/MS	By MS/MS	By MS/MS	789820000	839110000	815380000	690930000	416370000	551280000	520990000	423570000
P06744;Q8N196	P06744	30;1	30;1	30;1	Glucose-6-phosphate isomerase	GPI	2	65.4	65.4	65.4	63.146	558	0	323.31	By MS/MS	By MS/MS	By MS/MS	By MS/MS	By MS/MS	By MS/MS	By MS/MS	By MS/MS	12889000000	14273000000	10996000000	10220000000	8589300000	9980200000	10623000000	10886000000
P06748	P06748	22	22	22	Nucleophosmin	NPM1	1	60.9	60.9	60.9	32.575	294	0	323.31	By MS/MS	By MS/MS	By MS/MS	By MS/MS	By MS/MS	By MS/MS	By MS/MS	By MS/MS	50673000000	61611000000	51297000000	39908000000	44840000000	42476000000	58375000000	54286000000
P06753	P06753	22	10	9	Tropomyosin alpha-3 chain	TPM3	1	40.7	23.5	20.4	32.95	285	0	116.9	By MS/MS	By MS/MS	By MS/MS	By MS/MS	By MS/MS	By MS/MS	By MS/MS	By MS/MS	4844600000	5831800000	4617700000	3898500000	5184000000	5211600000	5203900000	5751700000
P06756	P06756	9	9	9	Integrin alpha-V;Integrin alpha-V heavy chain;Integrin alpha-V light chain	ITGAV	1	13.5	13.5	13.5	116.04	1048	0	24.928	By MS/MS	By MS/MS	By MS/MS	By MS/MS	By MS/MS	By MS/MS	By MS/MS	By MS/MS	115720000	89948000	86407000	98261000	39572000	41454000	108180000	49846000
P06865	P06865	3	3	3	Beta-hexosaminidase subunit alpha	HEXA	1	7	7	7	60.702	529	0.00027488	4.0765	By MS/MS	By MS/MS	By MS/MS	By MS/MS	By matching	By matching	By matching	By MS/MS	60475000	51335000	51201000	44380000	4556300	19950000	27540000	9469400
P07093	P07093	10	10	10	Glia-derived nexin	SERPINE2	1	37.7	37.7	37.7	44.002	398	0	40.963	By MS/MS	By MS/MS	By MS/MS	By MS/MS	By MS/MS	By MS/MS	By MS/MS	By MS/MS	511740000	720320000	512370000	380320000	198070000	288780000	318770000	318990000
P07099	P07099	7	7	7	Epoxide hydrolase 1	EPHX1	1	24.6	24.6	24.6	52.948	455	0	9.8019	By MS/MS	By MS/MS	By MS/MS	By MS/MS	By matching	By MS/MS	By MS/MS	By MS/MS	184580000	226110000	116570000	105880000	101200000	57562000	150310000	135360000
P07108	P07108	8	8	8	Acyl-CoA-binding protein	DBI	1	80.5	80.5	80.5	10.044	87	0	36.133	By MS/MS	By MS/MS	By MS/MS	By MS/MS	By MS/MS	By MS/MS	By MS/MS	By MS/MS	920000000	1328900000	1352800000	1187300000	718530000	916020000	944070000	1046400000
P07195	P07195	22	21	21	L-lactate dehydrogenase B chain	LDHB	1	62.9	59.3	59.3	36.638	334	0	323.31	By MS/MS	By MS/MS	By MS/MS	By MS/MS	By MS/MS	By MS/MS	By MS/MS	By MS/MS	28071000000	30657000000	26448000000	22851000000	20869000000	21625000000	24611000000	26744000000
P07196	P07196	4	3	3	Neurofilament light polypeptide	NEFL	1	8.3	6.6	6.6	61.516	543	0.00028588	4.915	By MS/MS	By MS/MS	By matching	By MS/MS	By matching	By MS/MS	By matching	By matching	6912700	6480800	9776000	7175400		4239600		4125600
P07199	P07199	5	5	5	Major centromere autoantigen B	CENPB	1	11.2	11.2	11.2	65.171	599	0	9.7926	By MS/MS	By MS/MS	By MS/MS	By MS/MS	By MS/MS	By MS/MS	By MS/MS	By MS/MS	16119000	43328000	13172000	32628000	52420000	73051000	35442000	87246000
P07203	P07203	6	6	6	Glutathione peroxidase 1	GPX1	1	43.8	43.8	43.8	22.088	203	0	25.593	By MS/MS	By MS/MS	By MS/MS	By MS/MS	By MS/MS	By MS/MS	By MS/MS	By MS/MS	107860000	122590000	140310000	130380000	128150000	183330000	167700000	186760000
P07237	P07237	36	36	36	Protein disulfide-isomerase	P4HB	1	69.7	69.7	69.7	57.116	508	0	323.31	By MS/MS	By MS/MS	By MS/MS	By MS/MS	By MS/MS	By MS/MS	By MS/MS	By MS/MS	12028000000	13522000000	10429000000	9429300000	10300000000	10151000000	10617000000	10073000000
P07305	P07305	6	6	6	Histone H1.0;Histone H1.0, N-terminally processed	H1F0	1	27.8	27.8	27.8	20.863	194	0	29.082	By MS/MS	By MS/MS	By MS/MS	By MS/MS	By MS/MS	By MS/MS	By MS/MS	By MS/MS	1171600000	1262100000	1044400000	850630000	952500000	1138800000	1281700000	1170600000
P07311	P07311	3	3	3	Acylphosphatase-1	ACYP1	1	35.4	35.4	35.4	11.261	99	0.00028686	4.9909	By MS/MS	By MS/MS	By MS/MS	By MS/MS	By MS/MS	By MS/MS	By MS/MS	By MS/MS	51693000	81148000	50181000	50263000	37427000	28149000	30643000	15999000
P07339	P07339	13	13	13	Cathepsin D;Cathepsin D light chain;Cathepsin D heavy chain	CTSD	1	42.7	42.7	42.7	44.552	412	0	85.789	By MS/MS	By MS/MS	By MS/MS	By MS/MS	By MS/MS	By MS/MS	By MS/MS	By MS/MS	984090000	1186000000	981470000	855430000	686500000	690030000	793940000	818540000
P07355;A6NMY6	P07355;A6NMY6	34;24	34;24	34;24	Annexin A2;Putative annexin A2-like protein	ANXA2;ANXA2P2	2	81.7	81.7	81.7	38.604	339	0	323.31	By MS/MS	By MS/MS	By MS/MS	By MS/MS	By MS/MS	By MS/MS	By MS/MS	By MS/MS	41118000000	51481000000	34850000000	32000000000	32411000000	38605000000	47497000000	40920000000
P07384	P07384	16	16	16	Calpain-1 catalytic subunit	CAPN1	1	29.6	29.6	29.6	81.889	714	0	39.484	By MS/MS	By MS/MS	By MS/MS	By MS/MS	By MS/MS	By MS/MS	By MS/MS	By MS/MS	524800000	679600000	385970000	420180000	545210000	606910000	634680000	449590000
P07437;A6NNZ2	P07437	26;8	5;0	5;0	Tubulin beta chain	TUBB	2	71.6	16.2	16.2	49.67	444	0	180.89	By MS/MS	By MS/MS	By MS/MS	By MS/MS	By MS/MS	By MS/MS	By MS/MS	By MS/MS	10000000000	13147000000	9662000000	7655600000	9261900000	7274400000	12368000000	10004000000
P07602	P07602	16	16	16	Prosaposin;Saposin-A;Saposin-B-Val;Saposin-B;Saposin-C;Saposin-D	PSAP	1	33.6	33.6	33.6	58.112	524	0	53.449	By MS/MS	By MS/MS	By MS/MS	By MS/MS	By MS/MS	By MS/MS	By MS/MS	By MS/MS	2829500000	3253700000	2492200000	2418600000	2214200000	2379800000	2643300000	2732300000
P07686	P07686	7	7	7	Beta-hexosaminidase subunit beta;Beta-hexosaminidase subunit beta chain B;Beta-hexosaminidase subunit beta chain A	HEXB	1	17.6	17.6	17.6	63.111	556	0	15.47	By MS/MS	By MS/MS	By MS/MS	By MS/MS	By MS/MS	By MS/MS	By MS/MS	By MS/MS	223700000	252330000	128730000	217280000	102250000	95029000	112370000	124280000
P07711;Q5NE16;P43235;O60911	P07711	4;1;1;1	4;1;1;1	4;1;1;1	Cathepsin L1;Cathepsin L1 heavy chain;Cathepsin L1 light chain	CTSL	4	17.4	17.4	17.4	37.564	333	0	13.445	By MS/MS	By MS/MS	By MS/MS	By MS/MS	By MS/MS	By MS/MS	By MS/MS	By MS/MS	174670000	205660000	176950000	165250000	176830000	187000000	196910000	246210000
P07737	P07737	16	16	16	Profilin-1	PFN1	1	87.1	87.1	87.1	15.054	140	0	251.64	By MS/MS	By MS/MS	By MS/MS	By MS/MS	By MS/MS	By MS/MS	By MS/MS	By MS/MS	27039000000	31939000000	26600000000	23662000000	22799000000	24512000000	26344000000	25750000000
P07741	P07741	11	11	11	Adenine phosphoribosyltransferase	APRT	1	80	80	80	19.608	180	0	105.5	By MS/MS	By MS/MS	By MS/MS	By MS/MS	By MS/MS	By MS/MS	By MS/MS	By MS/MS	1697500000	1681600000	1262100000	1309600000	1331200000	1378600000	1621200000	1822600000
P07814	P07814	90	90	89	Bifunctional glutamate/proline--tRNA ligase;Glutamate--tRNA ligase;Proline--tRNA ligase	EPRS	1	65.4	65.4	65.4	170.59	1512	0	323.31	By MS/MS	By MS/MS	By MS/MS	By MS/MS	By MS/MS	By MS/MS	By MS/MS	By MS/MS	9917200000	12481000000	10113000000	8242000000	8974700000	8763300000	11066000000	9469300000
P07858	P07858	6	6	6	Cathepsin B;Cathepsin B light chain;Cathepsin B heavy chain	CTSB	1	21.2	21.2	21.2	37.821	339	0	16.336	By MS/MS	By MS/MS	By MS/MS	By MS/MS	By MS/MS	By MS/MS	By MS/MS	By MS/MS	659810000	765660000	561390000	457270000	410570000	251310000	397010000	351250000
P07900;Q58FG0;Q14568;Q58FG1	P07900	67;10;10;2	67;10;10;2	47;6;4;1	Heat shock protein HSP 90-alpha	HSP90AA1	4	68.4	68.4	51.2	84.659	732	0	323.31	By MS/MS	By MS/MS	By MS/MS	By MS/MS	By MS/MS	By MS/MS	By MS/MS	By MS/MS	116830000000	125730000000	107270000000	90608000000	97751000000	99792000000	107900000000	102090000000
P07910;P0DMR1;O60812;B7ZW38;B2RXH8;Q86SE5	P07910	25;11;11;11;11;1	25;11;11;11;11;1	25;11;11;11;11;1	Heterogeneous nuclear ribonucleoproteins C1/C2	HNRNPC	6	59.5	59.5	59.5	33.67	306	0	208.9	By MS/MS	By MS/MS	By MS/MS	By MS/MS	By MS/MS	By MS/MS	By MS/MS	By MS/MS	17851000000	20403000000	16336000000	14064000000	16608000000	16467000000	19333000000	18771000000
P07919;A0A096LP55	P07919;A0A096LP55	5;3	5;3	5;3	Cytochrome b-c1 complex subunit 6, mitochondrial;Cytochrome b-c1 complex subunit 6	UQCRH;UQCRHL	2	74.7	74.7	74.7	10.739	91	0	86.988	By MS/MS	By MS/MS	By MS/MS	By MS/MS	By MS/MS	By MS/MS	By MS/MS	By MS/MS	553920000	633230000	540010000	510460000	481610000	551440000	609500000	464930000
P07942	P07942	29	29	29	Laminin subunit beta-1	LAMB1	1	25.6	25.6	25.6	198.04	1786	0	146.32	By MS/MS	By MS/MS	By MS/MS	By MS/MS	By MS/MS	By MS/MS	By MS/MS	By MS/MS	978300000	1250400000	818270000	635090000	295270000	338040000	361330000	373040000
P07951	P07951	25	13	10	Tropomyosin beta chain	TPM2	1	57.4	38.7	30.6	32.85	284	0	52.057	By MS/MS	By MS/MS	By MS/MS	By MS/MS	By MS/MS	By MS/MS	By MS/MS	By MS/MS	396730000	488760000	561910000	327020000	440780000	398560000	186240000	547530000
P07954	P07954	29	29	29	Fumarate hydratase, mitochondrial	FH	1	64.9	64.9	64.9	54.636	510	0	323.31	By MS/MS	By MS/MS	By MS/MS	By MS/MS	By MS/MS	By MS/MS	By MS/MS	By MS/MS	6364100000	5899500000	4730600000	5491000000	4347700000	5273800000	5284100000	6002500000
P07996	P07996	14	14	13	Thrombospondin-1	THBS1	1	15.3	15.3	14.7	129.38	1170	0	66.456	By MS/MS	By MS/MS	By MS/MS	By MS/MS	By MS/MS	By MS/MS	By MS/MS	By MS/MS	540740000	584240000	359980000	339570000	74707000	40908000	98919000	80207000
P08047	P08047	2	2	2	Transcription factor Sp1	SP1	1	5.5	5.5	5.5	80.692	785	0	11.587	By MS/MS	By MS/MS	By MS/MS	By MS/MS		By MS/MS	By MS/MS	By MS/MS	24314000	67149000	26945000	17513000		43117000	19043000	25822000
P08133	P08133	44	44	44	Annexin A6	ANXA6	1	67.5	67.5	67.5	75.872	673	0	323.31	By MS/MS	By MS/MS	By MS/MS	By MS/MS	By MS/MS	By MS/MS	By MS/MS	By MS/MS	4964000000	5061100000	3870800000	3783100000	3765100000	3920200000	4332400000	4385800000
P08134	P08134	9	1	1	Rho-related GTP-binding protein RhoC	RHOC	1	53.4	6.2	6.2	22.006	193	0.0027652	2.6735	By MS/MS	By MS/MS	By MS/MS	By MS/MS	By MS/MS	By MS/MS	By MS/MS	By MS/MS	141060000	139780000	110980000	105360000	126210000	121110000	175960000	129770000
P08138	P08138	5	5	5	Tumor necrosis factor receptor superfamily member 16	NGFR	1	20.1	20.1	20.1	45.183	427	0	57.29	By MS/MS	By MS/MS	By MS/MS	By MS/MS	By MS/MS	By MS/MS	By MS/MS	By MS/MS	236330000	249550000	169790000	148030000	167240000	176560000	181930000	227140000
P08174	P08174	3	3	3	Complement decay-accelerating factor	CD55	1	12.6	12.6	12.6	41.4	381	0.00028523	4.884	By MS/MS	By matching	By matching	By MS/MS		By MS/MS	By MS/MS	By MS/MS	23367000	17288000	24599000	14167000		43885000	79986000	63968000
P08195	P08195	27	27	27	4F2 cell-surface antigen heavy chain	SLC3A2	1	47	47	47	67.993	630	0	323.31	By MS/MS	By MS/MS	By MS/MS	By MS/MS	By MS/MS	By MS/MS	By MS/MS	By MS/MS	9166600000	9686800000	7384100000	5915700000	7020400000	6251200000	8726500000	8517800000
P08237	P08237	25	22	21	ATP-dependent 6-phosphofructokinase, muscle type	PFKM	1	38.7	35.3	34.1	85.182	780	0	175.59	By MS/MS	By MS/MS	By MS/MS	By MS/MS	By MS/MS	By MS/MS	By MS/MS	By MS/MS	948620000	995990000	1100600000	942850000	715890000	868860000	813630000	789080000
P08238;Q58FF7	P08238	67;27	47;14	38;10	Heat shock protein HSP 90-beta	HSP90AB1	2	78.3	61.9	51.2	83.263	724	0	323.31	By MS/MS	By MS/MS	By MS/MS	By MS/MS	By MS/MS	By MS/MS	By MS/MS	By MS/MS	73707000000	78248000000	66262000000	56786000000	62032000000	64543000000	74125000000	70441000000
P08240	P08240	23	23	23	Signal recognition particle receptor subunit alpha	SRPR	1	42.3	42.3	42.3	69.81	638	0	122.11	By MS/MS	By MS/MS	By MS/MS	By MS/MS	By MS/MS	By MS/MS	By MS/MS	By MS/MS	2299200000	2128700000	1439700000	941030000	1703900000	978320000	2001400000	1977000000
P08243	P08243	23	23	23	Asparagine synthetase [glutamine-hydrolyzing]	ASNS	1	50.3	50.3	50.3	64.369	561	0	151.33	By MS/MS	By MS/MS	By MS/MS	By MS/MS	By MS/MS	By MS/MS	By MS/MS	By MS/MS	1677300000	2093800000	1643700000	1351900000	1941500000	1688200000	2046600000	1838400000
P08397	P08397	8	8	8	Porphobilinogen deaminase	HMBS	1	36	36	36	39.33	361	0	27.757	By MS/MS	By MS/MS	By MS/MS	By MS/MS	By MS/MS	By MS/MS	By MS/MS	By MS/MS	420480000	335860000	288850000	300870000	481800000	457940000	579240000	488130000
P08559;P29803	P08559	19;3	19;3	19;3	Pyruvate dehydrogenase E1 component subunit alpha, somatic form, mitochondrial	PDHA1	2	54.1	54.1	54.1	43.295	390	0	86.264	By MS/MS	By MS/MS	By MS/MS	By MS/MS	By MS/MS	By MS/MS	By MS/MS	By MS/MS	1275900000	1636800000	1222000000	1027800000	1061100000	1109200000	1331600000	1497100000
P08572	P08572	3	3	3	Collagen alpha-2(IV) chain;Canstatin	COL4A2	1	2	2	2	167.55	1712	0.0018051	3.0039	By MS/MS	By MS/MS	By MS/MS	By MS/MS				By matching	38474000	63511000	33745000	42972000				16229000
P08574	P08574	8	8	8	Cytochrome c1, heme protein, mitochondrial	CYC1	1	29.8	29.8	29.8	35.422	325	0	78.442	By MS/MS	By MS/MS	By MS/MS	By MS/MS	By MS/MS	By MS/MS	By MS/MS	By MS/MS	693630000	763310000	597740000	513470000	585550000	632100000	820990000	727990000
P08579	P08579	13	13	11	U2 small nuclear ribonucleoprotein B	SNRPB2	1	58.7	58.7	52	25.486	225	0	95.375	By MS/MS	By MS/MS	By MS/MS	By MS/MS	By MS/MS	By MS/MS	By MS/MS	By MS/MS	1791300000	1845300000	1350000000	1526300000	1189800000	1233000000	1467900000	1768000000
P08621	P08621	17	17	17	U1 small nuclear ribonucleoprotein 70 kDa	SNRNP70	1	43.5	43.5	43.5	51.556	437	0	84.417	By MS/MS	By MS/MS	By MS/MS	By MS/MS	By MS/MS	By MS/MS	By MS/MS	By MS/MS	2185100000	2241700000	1929900000	1510800000	1988500000	1837800000	2755700000	2186200000
P08648	P08648	4	4	4	Integrin alpha-5;Integrin alpha-5 heavy chain;Integrin alpha-5 light chain	ITGA5	1	5	5	5	114.54	1049	0	49.656	By MS/MS	By MS/MS	By MS/MS	By MS/MS	By MS/MS	By MS/MS	By MS/MS	By MS/MS	71667000	47631000	48828000	40123000	22173000	31984000	26653000	17837000
P08670;P17661;P41219;P14136;Q16352;Q8N1N4;P12036	P08670	72;6;5;2;2;1;1	72;6;5;2;2;1;1	67;2;3;1;0;0;0	Vimentin	VIM	7	93.1	93.1	87.3	53.651	466	0	323.31	By MS/MS	By MS/MS	By MS/MS	By MS/MS	By MS/MS	By MS/MS	By MS/MS	By MS/MS	175770000000	200080000000	167280000000	150590000000	179470000000	183270000000	213310000000	188780000000
P08708	P08708	12	12	12	40S ribosomal protein S17	RPS17	1	65.9	65.9	65.9	15.55	135	0	323.31	By MS/MS	By MS/MS	By MS/MS	By MS/MS	By MS/MS	By MS/MS	By MS/MS	By MS/MS	10161000000	10346000000	7976800000	7962200000	8402800000	9262200000	11091000000	8553400000
P08754;P11488;P09471;P19087;A8MTJ3	P08754	12;2;2;2;2	6;0;0;0;0	6;0;0;0;0	Guanine nucleotide-binding protein G(k) subunit alpha	GNAI3	5	38.1	20.9	20.9	40.532	354	0	44.844	By MS/MS	By MS/MS	By MS/MS	By MS/MS	By MS/MS	By MS/MS	By MS/MS	By MS/MS	206490000	340270000	265860000	177230000	230470000	224620000	198010000	196930000
P08758	P08758	28	28	28	Annexin A5	ANXA5	1	80.9	80.9	80.9	35.936	320	0	323.31	By MS/MS	By MS/MS	By MS/MS	By MS/MS	By MS/MS	By MS/MS	By MS/MS	By MS/MS	13988000000	16203000000	14097000000	12479000000	13313000000	11420000000	16016000000	14212000000
P08865	P08865	16	16	16	40S ribosomal protein SA	RPSA	1	64.1	64.1	64.1	32.854	295	0	323.31	By MS/MS	By MS/MS	By MS/MS	By MS/MS	By MS/MS	By MS/MS	By MS/MS	By MS/MS	13563000000	14648000000	11663000000	10815000000	12365000000	13690000000	15538000000	13231000000
P08962	P08962	4	4	4	CD63 antigen	CD63	1	21	21	21	25.636	238	0	26.658	By MS/MS	By MS/MS	By MS/MS	By MS/MS	By MS/MS	By MS/MS	By MS/MS	By MS/MS	374160000	596370000	542650000	422540000	421660000	310280000	248590000	544560000
P09001	P09001	6	6	6	39S ribosomal protein L3, mitochondrial	MRPL3	1	31	31	31	38.632	348	0	12.122	By MS/MS	By MS/MS	By MS/MS	By MS/MS	By MS/MS	By MS/MS	By MS/MS	By MS/MS	224240000	209260000	210480000	151330000	161910000	135360000	187460000	119170000
P09012	P09012	10	8	8	U1 small nuclear ribonucleoprotein A	SNRPA	1	41.1	35.8	35.8	31.279	282	0	72.191	By MS/MS	By MS/MS	By MS/MS	By MS/MS	By MS/MS	By MS/MS	By MS/MS	By MS/MS	1071500000	1038600000	947910000	981270000	924260000	953350000	900350000	1009900000
P09104;P13929	P09104	11;5	7;1	7;1	Gamma-enolase	ENO2	2	32.9	19.8	19.8	47.268	434	0	24.525	By MS/MS	By MS/MS	By MS/MS	By MS/MS	By MS/MS	By MS/MS	By MS/MS	By MS/MS	421940000	329550000	3048500000	349000000	501280000	416960000	690850000	313810000
P09110	P09110	8	8	8	3-ketoacyl-CoA thiolase, peroxisomal	ACAA1	1	30.7	30.7	30.7	44.292	424	0	31.548	By MS/MS	By MS/MS	By MS/MS	By MS/MS	By MS/MS	By MS/MS	By MS/MS	By MS/MS	175200000	167670000	144200000	113700000	140330000	202470000	199180000	231280000
P09132	P09132	6	6	6	Signal recognition particle 19 kDa protein	SRP19	1	38.2	38.2	38.2	16.156	144	0	27.944	By MS/MS	By MS/MS	By MS/MS	By MS/MS	By MS/MS	By MS/MS	By MS/MS	By MS/MS	148620000	125250000	104880000	83532000	90918000	141410000	64822000	244690000
P09211	P09211	12	12	12	Glutathione S-transferase P	GSTP1	1	61	61	61	23.356	210	0	323.31	By MS/MS	By MS/MS	By MS/MS	By MS/MS	By MS/MS	By MS/MS	By MS/MS	By MS/MS	8085100000	9271800000	7372400000	6123300000	6281000000	6586700000	7908000000	7607800000
P09234	P09234	4	4	4	U1 small nuclear ribonucleoprotein C	SNRPC	1	30.2	30.2	30.2	17.394	159	0	66.071	By MS/MS	By MS/MS	By MS/MS	By MS/MS	By MS/MS	By MS/MS	By MS/MS	By MS/MS	482850000	681780000	647460000	275260000	551370000	367260000	483860000	543390000
P09382	P09382	10	10	10	Galectin-1	LGALS1	1	94.1	94.1	94.1	14.716	135	0	248.27	By MS/MS	By MS/MS	By MS/MS	By MS/MS	By MS/MS	By MS/MS	By MS/MS	By MS/MS	18526000000	19418000000	16964000000	13451000000	12959000000	15073000000	16509000000	14788000000
P09417	P09417	9	9	9	Dihydropteridine reductase	QDPR	1	53.7	53.7	53.7	25.789	244	0	66.788	By MS/MS	By MS/MS	By MS/MS	By MS/MS	By MS/MS	By MS/MS	By MS/MS	By MS/MS	414850000	480340000	355230000	507310000	344370000	309860000	499860000	448020000
P09429;B2RPK0	P09429;B2RPK0	19;10	19;10	13;5	High mobility group protein B1;Putative high mobility group protein B1-like 1	HMGB1;HMGB1P1	2	72.1	72.1	53.5	24.893	215	0	323.31	By MS/MS	By MS/MS	By MS/MS	By MS/MS	By MS/MS	By MS/MS	By MS/MS	By MS/MS	13807000000	15622000000	11287000000	10183000000	12078000000	11201000000	13139000000	10571000000
P09486	P09486	6	6	6	SPARC	SPARC	1	33.7	33.7	33.7	34.632	303	0	43.74	By MS/MS	By MS/MS	By MS/MS	By MS/MS		By matching	By matching		222210000	296720000	287580000	239630000		6918500	31127000
P09488;Q03013	P09488;Q03013	5;3	5;3	3;1	Glutathione S-transferase Mu 1;Glutathione S-transferase Mu 4	GSTM1;GSTM4	2	28	28	14.2	25.712	218	0	14.739	By MS/MS	By MS/MS	By MS/MS	By MS/MS	By MS/MS	By MS/MS	By MS/MS	By MS/MS	348140000	258660000	234000000	207540000	231010000	180570000	48764000	41224000
P09493	P09493	16	4	4	Tropomyosin alpha-1 chain	TPM1	1	37.3	13.7	13.7	32.708	284	0.00030779	6.5109	By MS/MS	By MS/MS	By MS/MS	By MS/MS	By MS/MS	By MS/MS	By MS/MS	By MS/MS	139770000	158990000	95933000	102360000	74365000	124430000	77711000	152680000
P09496	P09496	9	9	9	Clathrin light chain A	CLTA	1	23.8	23.8	23.8	27.076	248	0	23.362	By MS/MS	By MS/MS	By MS/MS	By MS/MS	By MS/MS	By MS/MS	By MS/MS	By MS/MS	1234400000	1907000000	1702300000	1261200000	1754500000	1370100000	1584700000	1484800000
P09497	P09497	6	6	6	Clathrin light chain B	CLTB	1	21	21	21	25.19	229	0	17.452	By MS/MS	By MS/MS	By MS/MS	By MS/MS	By MS/MS	By MS/MS	By MS/MS	By MS/MS	178080000	208480000	150080000	104050000	84112000	304200000	145640000	110470000
P09525	P09525	15	15	15	Annexin A4	ANXA4	1	46.4	46.4	46.4	35.882	319	0	138.1	By MS/MS	By MS/MS	By MS/MS	By MS/MS	By MS/MS	By MS/MS	By MS/MS	By MS/MS	488060000	692750000	589490000	510570000	478790000	463750000	529200000	485710000
P09543	P09543	17	17	17	2,3-cyclic-nucleotide 3-phosphodiesterase	CNP	1	39.9	39.9	39.9	47.578	421	0	41.035	By MS/MS	By MS/MS	By MS/MS	By MS/MS	By MS/MS	By MS/MS	By MS/MS	By MS/MS	434780000	604430000	446350000	340860000	409340000	378070000	429920000	384950000
P09622	P09622	18	18	18	Dihydrolipoyl dehydrogenase, mitochondrial	DLD	1	43.2	43.2	43.2	54.177	509	0	191.35	By MS/MS	By MS/MS	By MS/MS	By MS/MS	By MS/MS	By MS/MS	By MS/MS	By MS/MS	1575200000	2391100000	1809600000	1203600000	1362500000	1545700000	1836600000	1446700000
P09651;Q32P51	P09651;Q32P51	29;20	28;19	26;17	Heterogeneous nuclear ribonucleoprotein A1;Heterogeneous nuclear ribonucleoprotein A1, N-terminally processed;Heterogeneous nuclear ribonucleoprotein A1-like 2	HNRNPA1;HNRNPA1L2	2	59.1	59.1	57.3	38.746	372	0	323.31	By MS/MS	By MS/MS	By MS/MS	By MS/MS	By MS/MS	By MS/MS	By MS/MS	By MS/MS	34319000000	33791000000	30162000000	29228000000	33276000000	33253000000	34589000000	34853000000
P09661	P09661	13	13	13	U2 small nuclear ribonucleoprotein A	SNRPA1	1	54.1	54.1	54.1	28.415	255	0	60.651	By MS/MS	By MS/MS	By MS/MS	By MS/MS	By MS/MS	By MS/MS	By MS/MS	By MS/MS	946800000	1026100000	796900000	789280000	774530000	749600000	832430000	760230000
P09669	P09669	4	4	4	Cytochrome c oxidase subunit 6C	COX6C	1	49.3	49.3	49.3	8.7813	75	0.00032082	7.6093	By MS/MS	By MS/MS	By MS/MS	By MS/MS	By MS/MS	By MS/MS	By MS/MS	By MS/MS	316320000	286770000	277320000	254420000	272700000	268400000	327730000	294700000
P09874	P09874	52	52	52	Poly [ADP-ribose] polymerase 1	PARP1	1	61.9	61.9	61.9	113.08	1014	0	323.31	By MS/MS	By MS/MS	By MS/MS	By MS/MS	By MS/MS	By MS/MS	By MS/MS	By MS/MS	8385100000	9730500000	8272700000	6662000000	7774100000	7312200000	9003200000	8749000000
P09884	P09884	9	9	9	DNA polymerase alpha catalytic subunit	POLA1	1	8.3	8.3	8.3	165.91	1462	0	27.837	By MS/MS	By MS/MS	By MS/MS	By MS/MS	By MS/MS	By MS/MS	By MS/MS	By MS/MS	695930000	621710000	512440000	461410000	528900000	746360000	52928000	608130000
P09960	P09960	29	29	29	Leukotriene A-4 hydrolase	LTA4H	1	56.1	56.1	56.1	69.284	611	0	323.31	By MS/MS	By MS/MS	By MS/MS	By MS/MS	By MS/MS	By MS/MS	By MS/MS	By MS/MS	1669900000	2080400000	1569500000	1342900000	1280700000	1244600000	1515100000	1477200000
P09972	P09972	18	11	11	Fructose-bisphosphate aldolase C	ALDOC	1	60.2	46.4	46.4	39.455	364	0	226.77	By MS/MS	By MS/MS	By MS/MS	By MS/MS	By MS/MS	By MS/MS	By MS/MS	By MS/MS	3390700000	3159500000	2305700000	2219400000	2308800000	3253200000	3762900000	2550300000
P0DMN0;P0DMM9;P50225;P50226	P0DMN0;P0DMM9	7;7;2;1	7;7;2;1	7;7;2;1	Sulfotransferase 1A4;Sulfotransferase 1A3	SULT1A4;SULT1A3	4	38.3	38.3	38.3	34.196	295	0	26.403	By MS/MS	By MS/MS	By MS/MS	By MS/MS	By MS/MS	By MS/MS	By MS/MS	By MS/MS	182010000	190990000	200350000	134260000	31357000	62838000	64198000	51662000
P0DMV9;P0DMV8	P0DMV9;P0DMV8	43;43	37;37	24;24	Heat shock 70 kDa protein 1B;Heat shock 70 kDa protein 1A	HSPA1B;HSPA1A	2	69.7	65.2	41.8	70.051	641	0	323.31	By MS/MS	By MS/MS	By MS/MS	By MS/MS	By MS/MS	By MS/MS	By MS/MS	By MS/MS	22301000000	25306000000	21477000000	17798000000	18826000000	18460000000	22351000000	21461000000
P0DN76;Q01081;Q8WU68	P0DN76;Q01081;Q8WU68	11;11;6	11;11;6	11;11;6	Splicing factor U2AF 35 kDa subunit;Splicing factor U2AF 26 kDa subunit	U2AF1;U2AF1L4	3	45.4	45.4	45.4	27.872	240	0	54.44	By MS/MS	By MS/MS	By MS/MS	By MS/MS	By MS/MS	By MS/MS	By MS/MS	By MS/MS	858300000	1463600000	1378100000	1044200000	1291700000	1530200000	1502000000	1563400000
P0DN79;P35520	P0DN79;P35520	3;3	3;3	3;3	Cystathionine beta-synthase	CBS	2	8	8	8	60.586	551	0	9.3824	By MS/MS	By MS/MS	By MS/MS	By MS/MS	By matching	By MS/MS	By MS/MS	By MS/MS	78733000	104680000	63219000	62109000	48571000	14448000	65921000	56352000
P0DP25;P0DP24;P0DP23;P27482;P02585	P0DP25;P0DP24;P0DP23	12;12;12;2;1	12;12;12;2;1	12;12;12;2;1			5	61.1	61.1	61.1	16.837	149	0	323.31	By MS/MS	By MS/MS	By MS/MS	By MS/MS	By MS/MS	By MS/MS	By MS/MS	By MS/MS	11606000000	13486000000	8934100000	8914300000	9739400000	9045900000	8865500000	11072000000
P10155	P10155	14	14	14	60 kDa SS-A/Ro ribonucleoprotein	TROVE2	1	33.8	33.8	33.8	60.67	538	0	83.691	By MS/MS	By MS/MS	By MS/MS	By MS/MS	By MS/MS	By MS/MS	By MS/MS	By MS/MS	585490000	869550000	749940000	649380000	490130000	464650000	501520000	552570000
P10253	P10253	2	2	2	Lysosomal alpha-glucosidase;76 kDa lysosomal alpha-glucosidase;70 kDa lysosomal alpha-glucosidase	GAA	1	2.2	2.2	2.2	105.32	952	0.0096335	1.8422		By MS/MS	By matching	By MS/MS			By matching			23702000	21249000	30781000			18467000
P10321	P10321	12	2	1	HLA class I histocompatibility antigen, Cw-7 alpha chain	HLA-C	1	40.4	7.4	4.4	40.648	366	0.00028257	4.7198	By matching	By matching	By matching	By matching	By MS/MS	By MS/MS	By MS/MS	By MS/MS					124410000	119500000	116240000	135820000
P10398	P10398	3	3	3	Serine/threonine-protein kinase A-Raf	ARAF	1	6.4	6.4	6.4	67.585	606	0.0030105	2.641	By matching	By matching	By MS/MS	By MS/MS			By MS/MS		20722000	18268000	14909000	26502000			11802000
P10412;P22492	P10412	16;5	6;0	6;0	Histone H1.4	HIST1H1E	2	47.5	18.7	18.7	21.865	219	0	42.701	By MS/MS	By MS/MS	By MS/MS	By MS/MS	By MS/MS	By MS/MS	By MS/MS	By MS/MS	1261500000	247240000	247550000	249920000	125440000	1215900000	576800000	259910000
P10515	P10515	14	14	14	Dihydrolipoyllysine-residue acetyltransferase component of pyruvate dehydrogenase complex, mitochondrial	DLAT	1	31.8	31.8	31.8	68.996	647	0	60.986	By MS/MS	By MS/MS	By MS/MS	By MS/MS	By MS/MS	By MS/MS	By MS/MS	By MS/MS	677150000	679390000	503630000	463610000	459960000	424170000	551930000	577630000
P10599	P10599	12	12	12	Thioredoxin	TXN	1	95.2	95.2	95.2	11.737	105	0	111.57	By MS/MS	By MS/MS	By MS/MS	By MS/MS	By MS/MS	By MS/MS	By MS/MS	By MS/MS	11474000000	13276000000	9894100000	7180200000	8746900000	9448000000	11850000000	11397000000
P10606	P10606	8	8	8	Cytochrome c oxidase subunit 5B, mitochondrial	COX5B	1	61.2	61.2	61.2	13.696	129	0	20.251	By MS/MS	By MS/MS	By MS/MS	By MS/MS	By MS/MS	By MS/MS	By MS/MS	By MS/MS	629430000	659300000	621190000	476480000	493300000	621340000	628390000	610280000
P10619	P10619	6	6	6	Lysosomal protective protein;Lysosomal protective protein 32 kDa chain;Lysosomal protective protein 20 kDa chain	CTSA	1	17.9	17.9	17.9	54.465	480	0	27.959	By MS/MS	By MS/MS	By MS/MS	By MS/MS	By MS/MS	By MS/MS	By MS/MS	By MS/MS	153200000	209270000	197480000	179930000	131710000	162030000	122530000	134460000
P10620	P10620	6	6	6	Microsomal glutathione S-transferase 1	MGST1	1	30.3	30.3	30.3	17.598	155	0	54.012	By MS/MS	By MS/MS	By MS/MS	By MS/MS	By MS/MS	By MS/MS	By MS/MS	By MS/MS	928580000	1194600000	949430000	695070000	896450000	742270000	756810000	1097000000
P10644;P31321	P10644	12;1	12;1	12;1	cAMP-dependent protein kinase type I-alpha regulatory subunit;cAMP-dependent protein kinase type I-alpha regulatory subunit, N-terminally processed	PRKAR1A	2	37	37	37	42.981	381	0	91.719	By MS/MS	By MS/MS	By MS/MS	By MS/MS	By MS/MS	By MS/MS	By MS/MS	By MS/MS	1025700000	1169700000	970020000	886900000	609590000	818980000	928860000	675620000
P10768	P10768	9	9	9	S-formylglutathione hydrolase	ESD	1	50.4	50.4	50.4	31.462	282	0	90.619	By MS/MS	By MS/MS	By MS/MS	By MS/MS	By MS/MS	By MS/MS	By MS/MS	By MS/MS	1567100000	1800900000	1136500000	1446400000	1173600000	1352400000	1345500000	1614700000
P10809	P10809	53	53	53	60 kDa heat shock protein, mitochondrial	HSPD1	1	85	85	85	61.054	573	0	323.31	By MS/MS	By MS/MS	By MS/MS	By MS/MS	By MS/MS	By MS/MS	By MS/MS	By MS/MS	45245000000	51753000000	38567000000	35069000000	38791000000	40900000000	47276000000	49469000000
P11021	P11021	53	51	51	78 kDa glucose-regulated protein	HSPA5	1	62.1	61	61	72.332	654	0	323.31	By MS/MS	By MS/MS	By MS/MS	By MS/MS	By MS/MS	By MS/MS	By MS/MS	By MS/MS	23851000000	24433000000	20407000000	17762000000	24647000000	25395000000	30700000000	26781000000
P11047	P11047	33	33	33	Laminin subunit gamma-1	LAMC1	1	30.3	30.3	30.3	177.6	1609	0	235.74	By MS/MS	By MS/MS	By MS/MS	By MS/MS	By MS/MS	By MS/MS	By MS/MS	By MS/MS	1056400000	1216700000	925760000	735620000	314160000	266980000	345940000	343320000
P11117	P11117	3	3	3	Lysosomal acid phosphatase	ACP2	1	7.6	7.6	7.6	48.344	423	0.0034731	2.4713	By MS/MS	By matching	By MS/MS	By matching	By MS/MS	By MS/MS	By MS/MS	By MS/MS		36058000	37328000	8971900	38567000	49691000	30968000	49744000
P11142	P11142	57	57	40	Heat shock cognate 71 kDa protein	HSPA8	1	76.3	76.3	59	70.897	646	0	323.31	By MS/MS	By MS/MS	By MS/MS	By MS/MS	By MS/MS	By MS/MS	By MS/MS	By MS/MS	120660000000	127930000000	112330000000	97177000000	100670000000	101120000000	118340000000	113330000000
P11166	P11166	9	9	9	Solute carrier family 2, facilitated glucose transporter member 1	SLC2A1	1	14.4	14.4	14.4	54.083	492	0	75.87	By MS/MS	By MS/MS	By MS/MS	By MS/MS	By MS/MS	By MS/MS	By MS/MS	By MS/MS	1273000000	1390000000	1111300000	891890000	826860000	866890000	1002000000	1006000000
P11169;Q8TDB8	P11169;Q8TDB8	2;2	2;2	2;2	Solute carrier family 2, facilitated glucose transporter member 3;Solute carrier family 2, facilitated glucose transporter member 14	SLC2A3;SLC2A14	2	6.2	6.2	6.2	53.924	496	0.00032616	8.0913	By matching	By MS/MS		By MS/MS		By MS/MS	By MS/MS	By MS/MS	32494000	28602000		32304000		108980000	58061000	43678000
P11171	P11171	3	3	3	Protein 4.1	EPB41	1	7.3	7.3	7.3	97.016	864	0.0032451	2.5808	By MS/MS		By MS/MS	By matching	By MS/MS						28563000	26223000	79608000
P11172	P11172	19	19	19	Uridine 5-monophosphate synthase;Orotate phosphoribosyltransferase;Orotidine 5-phosphate decarboxylase	UMPS	1	50.4	50.4	50.4	52.221	480	0	128.08	By MS/MS	By MS/MS	By MS/MS	By MS/MS	By MS/MS	By MS/MS	By MS/MS	By MS/MS	975980000	1286900000	1086000000	684180000	839440000	831300000	1023200000	1225600000
P11177	P11177	15	15	15	Pyruvate dehydrogenase E1 component subunit beta, mitochondrial	PDHB	1	60.2	60.2	60.2	39.233	359	0	87.592	By MS/MS	By MS/MS	By MS/MS	By MS/MS	By MS/MS	By MS/MS	By MS/MS	By MS/MS	967830000	1179200000	948140000	762170000	923130000	863770000	963510000	888800000
P11182	P11182	2	2	2	Lipoamide acyltransferase component of branched-chain alpha-keto acid dehydrogenase complex, mitochondrial	DBT	1	7.1	7.1	7.1	53.486	482	0.00027762	4.3		By MS/MS		By MS/MS		By MS/MS	By matching	By matching		55301000		19834000		17293000	14895000	13329000
P11216	P11216	61	61	49	Glycogen phosphorylase, brain form	PYGB	1	68.7	68.7	54.2	96.695	843	0	323.31	By MS/MS	By MS/MS	By MS/MS	By MS/MS	By MS/MS	By MS/MS	By MS/MS	By MS/MS	11720000000	12922000000	10323000000	8962700000	7729800000	9230000000	9630500000	9009800000
P11233	P11233	6	3	3	Ras-related protein Ral-A	RALA	1	29.6	18.4	18.4	23.567	206	0.00031486	7.0988	By MS/MS	By MS/MS	By MS/MS	By MS/MS	By MS/MS	By MS/MS	By MS/MS	By MS/MS	212920000	103220000	136690000	162220000	117650000	197600000	151540000	190780000
P11234	P11234	7	7	4	Ras-related protein Ral-B	RALB	1	31.1	31.1	19.9	23.408	206	0	12.807	By MS/MS	By MS/MS	By MS/MS	By MS/MS	By MS/MS	By MS/MS	By MS/MS	By MS/MS	338460000	216610000	291680000	85312000	270460000	421100000	423320000	207390000
P11279	P11279	7	7	7	Lysosome-associated membrane glycoprotein 1	LAMP1	1	15.6	15.6	15.6	44.882	417	0	61.125	By MS/MS	By MS/MS	By MS/MS	By MS/MS	By MS/MS	By MS/MS	By MS/MS	By MS/MS	945660000	1074200000	920650000	792350000	870920000	728180000	1325100000	1022900000
P11310	P11310	10	10	10	Medium-chain specific acyl-CoA dehydrogenase, mitochondrial	ACADM	1	35.9	35.9	35.9	46.588	421	0	33.821	By MS/MS	By MS/MS	By MS/MS	By MS/MS	By MS/MS	By MS/MS	By MS/MS	By MS/MS	286410000	346290000	339510000	254190000	346370000	337250000	479780000	432060000
P11387;Q969P6	P11387	39;5	39;5	39;5	DNA topoisomerase 1	TOP1	2	47.8	47.8	47.8	90.725	765	0	313.77	By MS/MS	By MS/MS	By MS/MS	By MS/MS	By MS/MS	By MS/MS	By MS/MS	By MS/MS	4665300000	5323800000	3886900000	3441400000	4834400000	4622400000	5237100000	5485700000
P11388	P11388	34	34	24	DNA topoisomerase 2-alpha	TOP2A	1	26.6	26.6	20.5	174.38	1531	0	84.618	By MS/MS	By MS/MS	By MS/MS	By MS/MS	By MS/MS	By MS/MS	By MS/MS	By MS/MS	1091900000	1464600000	1146900000	883680000	403540000	359880000	577200000	448600000
P11413	P11413	34	34	34	Glucose-6-phosphate 1-dehydrogenase	G6PD	1	76.7	76.7	76.7	59.256	515	0	236.03	By MS/MS	By MS/MS	By MS/MS	By MS/MS	By MS/MS	By MS/MS	By MS/MS	By MS/MS	4600500000	5096300000	4343600000	3856900000	3669400000	3556100000	4148100000	3730700000
P11441	P11441	2	2	2	Ubiquitin-like protein 4A	UBL4A	1	16.6	16.6	16.6	17.776	157	0.0002845	4.8218	By MS/MS	By MS/MS	By MS/MS	By MS/MS	By MS/MS	By MS/MS	By MS/MS	By MS/MS	58973000	64362000	50243000	42173000	49574000	25249000	28421000	19270000
P11498	P11498	9	9	9	Pyruvate carboxylase, mitochondrial	PC	1	11.1	11.1	11.1	129.63	1178	0	15.71	By MS/MS	By MS/MS	By MS/MS	By MS/MS	By MS/MS	By MS/MS	By MS/MS	By MS/MS	103840000	121650000	136900000	73543000	112770000	86289000	81526000	103900000
P11586	P11586	47	47	47	C-1-tetrahydrofolate synthase, cytoplasmic;Methylenetetrahydrofolate dehydrogenase;Methenyltetrahydrofolate cyclohydrolase;Formyltetrahydrofolate synthetase;C-1-tetrahydrofolate synthase, cytoplasmic, N-terminally processed	MTHFD1	1	61.8	61.8	61.8	101.56	935	0	237.16	By MS/MS	By MS/MS	By MS/MS	By MS/MS	By MS/MS	By MS/MS	By MS/MS	By MS/MS	4067800000	4677800000	3748900000	3015200000	3888000000	3968500000	5488100000	4477400000
P11717	P11717	16	16	16	Cation-independent mannose-6-phosphate receptor	IGF2R	1	10	10	10	274.37	2491	0	44.341	By MS/MS	By MS/MS	By MS/MS	By MS/MS	By MS/MS	By MS/MS	By MS/MS	By MS/MS	196470000	233380000	206070000	220300000	165450000	138430000	176100000	182800000
P11766	P11766	14	14	14	Alcohol dehydrogenase class-3	ADH5	1	47.1	47.1	47.1	39.724	374	0	149.58	By MS/MS	By MS/MS	By MS/MS	By MS/MS	By MS/MS	By MS/MS	By MS/MS	By MS/MS	1599800000	1944400000	1746400000	1263900000	1429800000	1370700000	1462400000	1418200000
P11802	P11802	5	4	4	Cyclin-dependent kinase 4	CDK4	1	19.1	16.5	16.5	33.729	303	0.00031959	7.5143	By matching	By MS/MS	By MS/MS	By MS/MS	By MS/MS	By matching	By matching	By MS/MS	133150000	207250000	109450000	172070000	51656000	63079000		38228000
P11908	P11908	15	15	7	Ribose-phosphate pyrophosphokinase 2	PRPS2	1	56	56	24.5	34.769	318	0	113.84	By MS/MS	By MS/MS	By MS/MS	By MS/MS	By MS/MS	By MS/MS	By MS/MS	By MS/MS	1205600000	1274300000	1020100000	890170000	762980000	714840000	874310000	801500000
P11940;Q9H361;Q4VXU2;Q96DU9	P11940;Q9H361	35;19;5;1	35;19;5;1	26;16;3;1	Polyadenylate-binding protein 1;Polyadenylate-binding protein 3	PABPC1;PABPC3	4	61.5	61.5	44.7	70.67	636	0	323.31	By MS/MS	By MS/MS	By MS/MS	By MS/MS	By MS/MS	By MS/MS	By MS/MS	By MS/MS	11173000000	11223000000	8985100000	8355700000	8423800000	9588300000	11259000000	10149000000
P12004	P12004	14	14	14	Proliferating cell nuclear antigen	PCNA	1	68.6	68.6	68.6	28.768	261	0	237.15	By MS/MS	By MS/MS	By MS/MS	By MS/MS	By MS/MS	By MS/MS	By MS/MS	By MS/MS	4754100000	5014400000	3583700000	3256600000	3488300000	3982900000	4774100000	3880200000
P12074	P12074	2	2	2	Cytochrome c oxidase subunit 6A1, mitochondrial	COX6A1	1	43.1	43.1	43.1	12.155	109	0	10.433	By MS/MS	By MS/MS	By MS/MS	By matching	By MS/MS	By MS/MS	By MS/MS	By MS/MS	237920000	299370000	154830000	148870000	178790000	203590000	334670000	200900000
P12081	P12081	26	26	20	Histidine--tRNA ligase, cytoplasmic	HARS	1	55.8	55.8	44.4	57.41	509	0	175.11	By MS/MS	By MS/MS	By MS/MS	By MS/MS	By MS/MS	By MS/MS	By MS/MS	By MS/MS	2894400000	3253000000	2629700000	2441500000	2795300000	2502600000	2936200000	2744100000
P12109	P12109	5	5	5	Collagen alpha-1(VI) chain	COL6A1	1	10	10	10	108.53	1028	0	11.035	By MS/MS	By MS/MS	By MS/MS	By MS/MS	By matching	By matching	By matching	By matching	266990000	165790000	77418000	131620000	49457000	79487000	101980000	53183000
P12235	P12235	17	5	5	ADP/ATP translocase 1	SLC25A4	1	55.7	17.1	17.1	33.064	298	0	13.712	By MS/MS	By MS/MS	By MS/MS	By MS/MS	By MS/MS	By MS/MS	By MS/MS	By MS/MS	225870000	257160000	195980000	135740000	150360000	150130000	145070000	167570000
P12236	P12236	21	21	5	ADP/ATP translocase 3;ADP/ATP translocase 3, N-terminally processed	SLC25A6	1	66.1	66.1	20.8	32.866	298	0	174.79	By MS/MS	By MS/MS	By MS/MS	By MS/MS	By MS/MS	By MS/MS	By MS/MS	By MS/MS	14783000000	16664000000	13204000000	10399000000	12288000000	11352000000	14077000000	14365000000
P12268	P12268	34	34	31	Inosine-5-monophosphate dehydrogenase 2	IMPDH2	1	73.5	73.5	70.2	55.804	514	0	323.31	By MS/MS	By MS/MS	By MS/MS	By MS/MS	By MS/MS	By MS/MS	By MS/MS	By MS/MS	10524000000	12435000000	9502700000	8497400000	8832200000	8583200000	10937000000	9306400000
P12270	P12270	64	64	64	Nucleoprotein TPR	TPR	1	36.8	36.8	36.8	267.29	2363	0	323.31	By MS/MS	By MS/MS	By MS/MS	By MS/MS	By MS/MS	By MS/MS	By MS/MS	By MS/MS	2575300000	2556000000	2172900000	1936100000	2059100000	2285000000	2383500000	2263000000
P12277	P12277	3	3	3	Creatine kinase B-type	CKB	1	15.7	15.7	15.7	42.644	381	0.00031566	7.171	By MS/MS	By MS/MS	By MS/MS	By MS/MS					47582000	84286000	61519000	83213000
P12814;P35609;Q08043	P12814	67;18;14	43;3;2	43;3;2	Alpha-actinin-1	ACTN1	3	76.7	57.4	57.4	103.06	892	0	323.31	By MS/MS	By MS/MS	By MS/MS	By MS/MS	By MS/MS	By MS/MS	By MS/MS	By MS/MS	7795400000	8738200000	6890500000	5544000000	6895300000	6703900000	8997500000	7724200000
P12931;Q9H3Y6;P42685;P08581;Q04912	P12931	6;1;1;1;1	6;1;1;1;1	3;1;1;1;1	Proto-oncogene tyrosine-protein kinase Src	SRC	5	13.1	13.1	7.3	59.834	536	0	9.1407	By MS/MS	By MS/MS	By MS/MS	By MS/MS	By MS/MS	By MS/MS	By MS/MS	By MS/MS	114690000	133140000	106930000	101490000	50215000	44677000	59515000	76717000
P12955	P12955	14	14	14	Xaa-Pro dipeptidase	PEPD	1	41.6	41.6	41.6	54.548	493	0	69.732	By MS/MS	By MS/MS	By MS/MS	By MS/MS	By MS/MS	By MS/MS	By MS/MS	By MS/MS	514130000	671790000	425400000	463980000	537400000	468870000	497140000	370660000
P12956	P12956	40	40	40	X-ray repair cross-complementing protein 6	XRCC6	1	58	58	58	69.842	609	0	323.31	By MS/MS	By MS/MS	By MS/MS	By MS/MS	By MS/MS	By MS/MS	By MS/MS	By MS/MS	9519500000	10350000000	9007500000	8083900000	8289200000	8778300000	9743000000	9402000000
P13010	P13010	48	48	48	X-ray repair cross-complementing protein 5	XRCC5	1	74	74	74	82.704	732	0	323.31	By MS/MS	By MS/MS	By MS/MS	By MS/MS	By MS/MS	By MS/MS	By MS/MS	By MS/MS	10895000000	13137000000	9808500000	9927700000	9896200000	10337000000	15393000000	10707000000
P13051	P13051	2	2	2	Uracil-DNA glycosylase	UNG	1	10.5	10.5	10.5	34.645	313	0.00030807	6.5432	By matching	By MS/MS	By MS/MS	By MS/MS			By matching	By MS/MS	13284000	45601000	19048000				11381000
P13073	P13073	11	11	11	Cytochrome c oxidase subunit 4 isoform 1, mitochondrial	COX4I1	1	56.2	56.2	56.2	19.576	169	0	28.424	By MS/MS	By MS/MS	By MS/MS	By MS/MS	By MS/MS	By MS/MS	By MS/MS	By MS/MS	1419600000	1433000000	1224200000	873120000	773150000	633390000	718330000	777380000
P13284	P13284	2	2	2	Gamma-interferon-inducible lysosomal thiol reductase	IFI30	1	14.8	14.8	14.8	27.963	250	0.00031476	7.086	By matching		By MS/MS	By MS/MS	By MS/MS	By MS/MS	By MS/MS	By MS/MS	25261000		68308000	62469000	306930000	241900000	438570000	427090000
P13473	P13473	3	3	3	Lysosome-associated membrane glycoprotein 2	LAMP2	1	7.1	7.1	7.1	44.96	410	0	10.959	By MS/MS	By MS/MS	By MS/MS	By MS/MS	By MS/MS	By MS/MS	By MS/MS	By MS/MS	145520000	158880000	167080000	132430000	130040000	135200000	117030000	123860000
P13489	P13489	25	25	25	Ribonuclease inhibitor	RNH1	1	80.9	80.9	80.9	49.973	461	0	323.31	By MS/MS	By MS/MS	By MS/MS	By MS/MS	By MS/MS	By MS/MS	By MS/MS	By MS/MS	3417000000	4388600000	3528400000	3084300000	3245600000	3146300000	3451500000	3504500000
P13639	P13639	65	65	64	Elongation factor 2	EEF2	1	74.2	74.2	73.1	95.337	858	0	323.31	By MS/MS	By MS/MS	By MS/MS	By MS/MS	By MS/MS	By MS/MS	By MS/MS	By MS/MS	63367000000	67495000000	53980000000	46489000000	56921000000	57131000000	67006000000	71005000000
P13645;Q7Z3Z0;Q7Z3Y8;Q99456;Q2M2I5;Q7Z3Y9	P13645	28;2;2;2;2;1	27;2;2;2;1;1	21;0;0;0;0;0	Keratin, type I cytoskeletal 10	KRT10	6	53.1	51.9	45.2	58.826	584	0	298.2	By MS/MS	By MS/MS	By MS/MS	By MS/MS	By MS/MS	By MS/MS	By MS/MS	By MS/MS	943430000	1472600000	3148900000	2126400000	517170000	577970000	2844500000	1798900000
P13646	P13646	10	7	5	Keratin, type I cytoskeletal 13	KRT13	1	19	14.8	10.7	49.588	458	0	20.727	By matching	By MS/MS	By matching	By MS/MS	By matching	By matching	By matching	By matching	23201000	381020000	18043000	70535000		21965000	27531000	56150000
P13647	P13647	12	6	4	Keratin, type II cytoskeletal 5	KRT5	1	17.3	10.8	7.5	62.378	590	0	10.14	By matching	By MS/MS	By MS/MS	By MS/MS	By MS/MS	By MS/MS	By MS/MS	By MS/MS		115520000	76103000	54302000	38794000	268440000	471970000	34290000
P13667	P13667	38	38	38	Protein disulfide-isomerase A4	PDIA4	1	62	62	62	72.932	645	0	318.19	By MS/MS	By MS/MS	By MS/MS	By MS/MS	By MS/MS	By MS/MS	By MS/MS	By MS/MS	4424400000	5388600000	4146100000	3497700000	3938900000	3541800000	4396700000	4330700000
P13674	P13674	8	8	8	Prolyl 4-hydroxylase subunit alpha-1	P4HA1	1	20.6	20.6	20.6	61.049	534	0	36.593	By MS/MS	By MS/MS	By MS/MS	By MS/MS	By MS/MS	By MS/MS	By MS/MS	By MS/MS	136610000	171920000	173050000	77071000	93989000	81146000	92690000	123510000
P13693;Q9HAU6;Q56UQ5	P13693	11;2;2	11;2;2	11;2;2	Translationally-controlled tumor protein	TPT1	3	50	50	50	19.595	172	0	100.68	By MS/MS	By MS/MS	By MS/MS	By MS/MS	By MS/MS	By MS/MS	By MS/MS	By MS/MS	8000100000	8409900000	6445100000	5806100000	6506200000	6799700000	9159800000	7450900000
P13716	P13716	3	3	3	Delta-aminolevulinic acid dehydratase	ALAD	1	10.9	10.9	10.9	36.294	330	0.00031766	7.3669	By MS/MS	By MS/MS	By MS/MS	By MS/MS	By matching	By MS/MS	By MS/MS	By MS/MS	26459000	26006000	19354000	30512000	13548000	14675000	13299000	16601000
P13760;Q30154;Q30167	P13760	9;4;3	6;2;2	4;0;0	HLA class II histocompatibility antigen, DRB1-4 beta chain	HLA-DRB1	3	33.1	20.3	16.9	30.112	266	0	33.511	By matching	By matching	By MS/MS	By MS/MS	By MS/MS	By MS/MS	By MS/MS	By MS/MS	64801000	51280000	68790000	71922000	760280000	744200000	769740000	927950000
P13761;Q9TQE0;P79483;Q9GIY3	P13761;Q9TQE0	11;8;5;1	11;8;5;1	5;3;0;0	HLA class II histocompatibility antigen, DRB1-7 beta chain;HLA class II histocompatibility antigen, DRB1-9 beta chain	HLA-DRB1	4	50.8	50.8	19.9	29.822	266	0	62.143	By MS/MS	By matching	By MS/MS	By MS/MS	By MS/MS	By MS/MS	By MS/MS	By MS/MS	183100000	117650000	111340000	134570000	928950000	925300000	1318400000	1112700000
P13762	P13762	4	4	4	HLA class II histocompatibility antigen, DR beta 4 chain	HLA-DRB4	1	27.8	27.8	27.8	29.941	266	0	45.76					By MS/MS	By MS/MS	By MS/MS	By MS/MS					133660000	185320000	191830000	187340000
P13797;P13796	P13797	18;1	18;1	17;1	Plastin-3	PLS3	2	35.2	35.2	33.3	70.81	630	0	135.47	By MS/MS	By MS/MS	By MS/MS	By MS/MS	By MS/MS	By MS/MS	By MS/MS	By MS/MS	548040000	705220000	556020000	530700000	434360000	489390000	459890000	487520000
P13798	P13798	14	14	14	Acylamino-acid-releasing enzyme	APEH	1	28.6	28.6	28.6	81.224	732	0	34.012	By MS/MS	By MS/MS	By MS/MS	By MS/MS	By MS/MS	By MS/MS	By MS/MS	By MS/MS	520270000	627910000	412400000	410960000	324230000	278900000	342160000	413190000
P13804	P13804	17	17	17	Electron transfer flavoprotein subunit alpha, mitochondrial	ETFA	1	71.2	71.2	71.2	35.079	333	0	139.52	By MS/MS	By MS/MS	By MS/MS	By MS/MS	By MS/MS	By MS/MS	By MS/MS	By MS/MS	4649200000	3315000000	3634500000	3706600000	3667200000	4357100000	4632100000	2745200000
P13807;P54840	P13807	11;1	11;1	11;1	Glycogen [starch] synthase, muscle	GYS1	2	22.3	22.3	22.3	83.785	737	0	50.599	By MS/MS	By MS/MS	By MS/MS	By MS/MS	By MS/MS	By MS/MS	By MS/MS	By MS/MS	486080000	544330000	506140000	372850000	129130000	390070000	444310000	467300000
P13861;P31323	P13861	15;2	15;2	15;2	cAMP-dependent protein kinase type II-alpha regulatory subunit	PRKAR2A	2	44.6	44.6	44.6	45.518	404	0	137.57	By MS/MS	By MS/MS	By MS/MS	By MS/MS	By MS/MS	By MS/MS	By MS/MS	By MS/MS	795370000	935080000	784230000	705810000	726590000	682750000	773700000	763020000
P13984	P13984	8	8	8	General transcription factor IIF subunit 2	GTF2F2	1	49.4	49.4	49.4	28.38	249	0	49.137	By MS/MS	By MS/MS	By MS/MS	By MS/MS	By MS/MS	By MS/MS	By MS/MS	By MS/MS	513290000	496140000	548680000	393720000	399200000	425530000	457860000	293780000
P13987	P13987	5	5	5	CD59 glycoprotein	CD59	1	25.8	25.8	25.8	14.177	128	0	14.06	By MS/MS	By MS/MS	By MS/MS	By MS/MS	By MS/MS	By MS/MS	By MS/MS	By MS/MS	687760000	793390000	930810000	809440000	775760000	750780000	585390000	884760000
P13995	P13995	8	8	8	Bifunctional methylenetetrahydrofolate dehydrogenase/cyclohydrolase, mitochondrial;NAD-dependent methylenetetrahydrofolate dehydrogenase;Methenyltetrahydrofolate cyclohydrolase	MTHFD2	1	42	42	42	37.895	350	0	40.63	By MS/MS	By MS/MS	By MS/MS	By MS/MS	By MS/MS	By MS/MS	By MS/MS	By MS/MS	618980000	800260000	462280000	421190000	442690000	478300000	435690000	595140000
P14174	P14174	4	4	4	Macrophage migration inhibitory factor	MIF	1	41.7	41.7	41.7	12.476	115	0	33.145	By MS/MS	By MS/MS	By MS/MS	By MS/MS	By MS/MS	By MS/MS	By MS/MS	By MS/MS	3337000000	3835900000	2835600000	2622000000	2722100000	3107000000	3241400000	2906900000
P14314	P14314	22	22	22	Glucosidase 2 subunit beta	PRKCSH	1	44.7	44.7	44.7	59.425	528	0	323.31	By MS/MS	By MS/MS	By MS/MS	By MS/MS	By MS/MS	By MS/MS	By MS/MS	By MS/MS	9305400000	11268000000	8470800000	7172300000	8610500000	9102900000	11721000000	9292600000
P14324	P14324	7	7	7	Farnesyl pyrophosphate synthase	FDPS	1	23.2	23.2	23.2	48.275	419	0	92.056	By MS/MS	By MS/MS	By MS/MS	By MS/MS	By MS/MS	By MS/MS	By MS/MS	By MS/MS	1146600000	1259900000	1134300000	990900000	726090000	800560000	706900000	683940000
P14406	P14406	2	2	2	Cytochrome c oxidase subunit 7A2, mitochondrial	COX7A2	1	27.7	27.7	27.7	9.3959	83	0	10.63	By MS/MS	By MS/MS	By MS/MS	By MS/MS	By MS/MS	By MS/MS	By MS/MS	By MS/MS	229750000	237030000	201380000	151780000	106320000	220950000	147160000	238640000
P14550	P14550	11	11	11	Alcohol dehydrogenase [NADP(+)]	AKR1A1	1	47.7	47.7	47.7	36.573	325	0	51.553	By MS/MS	By MS/MS	By MS/MS	By MS/MS	By MS/MS	By MS/MS	By MS/MS	By MS/MS	597800000	771530000	659250000	405380000	446780000	419200000	658240000	600780000
P14618;P30613	P14618	58;1	58;1	58;1	Pyruvate kinase PKM	PKM	2	85.1	85.1	85.1	57.936	531	0	323.31	By MS/MS	By MS/MS	By MS/MS	By MS/MS	By MS/MS	By MS/MS	By MS/MS	By MS/MS	125700000000	127210000000	107000000000	101550000000	102910000000	113880000000	123730000000	115510000000
P14625;Q58FF3	P14625	64;8	62;8	62;8	Endoplasmin	HSP90B1	2	71.1	69.4	69.4	92.468	803	0	323.31	By MS/MS	By MS/MS	By MS/MS	By MS/MS	By MS/MS	By MS/MS	By MS/MS	By MS/MS	16477000000	18147000000	14456000000	12577000000	14265000000	15464000000	19003000000	16176000000
P14635;O95067	P14635	7;1	7;1	7;1	G2/mitotic-specific cyclin-B1	CCNB1	2	22.6	22.6	22.6	48.337	433	0	18.586	By MS/MS	By MS/MS	By MS/MS	By MS/MS	By MS/MS	By matching	By matching	By matching	145330000	200400000	131490000	131300000	37942000	41721000	29379000	19105000
P14735	P14735	21	21	21	Insulin-degrading enzyme	IDE	1	27.6	27.6	27.6	117.97	1019	0	72.473	By MS/MS	By MS/MS	By MS/MS	By MS/MS	By MS/MS	By MS/MS	By MS/MS	By MS/MS	584150000	746040000	705630000	524890000	508760000	483880000	513670000	470860000
P14854	P14854	7	7	7	Cytochrome c oxidase subunit 6B1	COX6B1	1	75.6	75.6	75.6	10.192	86	0	90.345	By MS/MS	By MS/MS	By MS/MS	By MS/MS	By MS/MS	By MS/MS	By MS/MS	By MS/MS	491320000	450520000	435940000	300900000	282400000	294860000	235640000	335460000
P14859;Q9UKI9;P09086	P14859;Q9UKI9;P09086	5;3;3	5;3;3	5;3;3	POU domain, class 2, transcription factor 1;POU domain, class 2, transcription factor 3;POU domain, class 2, transcription factor 2	POU2F1;POU2F3;POU2F2	3	10.1	10.1	10.1	76.471	743	0	16.244	By MS/MS	By MS/MS	By MS/MS	By MS/MS	By MS/MS	By MS/MS	By MS/MS	By MS/MS	54906000	87878000	69485000	83926000	74039000	89488000	98429000	78677000
P14866	P14866	32	32	31	Heterogeneous nuclear ribonucleoprotein L	HNRNPL	1	77.4	77.4	76.2	64.132	589	0	323.31	By MS/MS	By MS/MS	By MS/MS	By MS/MS	By MS/MS	By MS/MS	By MS/MS	By MS/MS	10060000000	12028000000	9456700000	8300400000	8538600000	9637600000	11529000000	10051000000
P14868	P14868	32	32	32	Aspartate--tRNA ligase, cytoplasmic	DARS	1	65.9	65.9	65.9	57.136	501	0	179.41	By MS/MS	By MS/MS	By MS/MS	By MS/MS	By MS/MS	By MS/MS	By MS/MS	By MS/MS	3682300000	3926600000	3188500000	2447700000	2784900000	2576400000	3188000000	2795400000
P14902	P14902	20	20	20	Indoleamine 2,3-dioxygenase 1	IDO1	1	51.9	51.9	51.9	45.326	403	0	116.72					By MS/MS	By MS/MS	By MS/MS	By MS/MS					2471600000	2525900000	2692700000	2555300000
P14927	P14927	5	5	5	Cytochrome b-c1 complex subunit 7	UQCRB	1	40.5	40.5	40.5	13.53	111	0	16.134	By MS/MS	By MS/MS	By MS/MS	By MS/MS	By MS/MS	By MS/MS	By MS/MS	By MS/MS	194790000	248910000	218500000	149160000	201960000	187730000	188220000	204020000
P15121;C9JRZ8	P15121	17;1	17;1	17;1	Aldose reductase	AKR1B1	2	64.9	64.9	64.9	35.853	316	0	313.12	By MS/MS	By MS/MS	By MS/MS	By MS/MS	By MS/MS	By MS/MS	By MS/MS	By MS/MS	7129300000	7999900000	6051000000	5581600000	5169100000	5837700000	6680600000	5549600000
P15144	P15144	34	34	34	Aminopeptidase N	ANPEP	1	37.1	37.1	37.1	109.54	967	0	250.87	By MS/MS	By MS/MS	By MS/MS	By MS/MS	By MS/MS	By MS/MS	By MS/MS	By MS/MS	4440300000	4749500000	3813000000	3138800000	4179800000	3602000000	4910200000	5030300000
P15170	P15170	28	28	14	Eukaryotic peptide chain release factor GTP-binding subunit ERF3A	GSPT1	1	56.7	56.7	31.1	55.755	499	0	158.94	By MS/MS	By MS/MS	By MS/MS	By MS/MS	By MS/MS	By MS/MS	By MS/MS	By MS/MS	2748500000	3037800000	2902000000	2283500000	2218100000	2650700000	2861600000	2371100000
P15311	P15311	40	30	29	Ezrin	EZR	1	67.4	53.4	52	69.412	586	0	211.28	By MS/MS	By MS/MS	By MS/MS	By MS/MS	By MS/MS	By MS/MS	By MS/MS	By MS/MS	5285600000	5529500000	4452600000	4248700000	4135200000	4726800000	5334100000	4302200000
P15374	P15374	9	9	9	Ubiquitin carboxyl-terminal hydrolase isozyme L3	UCHL3	1	52.6	52.6	52.6	26.182	230	0	58.84	By MS/MS	By MS/MS	By MS/MS	By MS/MS	By MS/MS	By MS/MS	By MS/MS	By MS/MS	548590000	800440000	649330000	592140000	659640000	554760000	497780000	602300000
P15407	P15407	8	8	8	Fos-related antigen 1	FOSL1	1	28.8	28.8	28.8	29.413	271	0	25.035	By MS/MS	By MS/MS	By MS/MS	By MS/MS	By MS/MS	By MS/MS	By MS/MS	By MS/MS	279160000	351930000	210450000	189620000	253820000	353080000	682800000	411750000
P15531	P15531	13	7	7	Nucleoside diphosphate kinase A	NME1	1	70.4	39.5	39.5	17.149	152	0	62.984	By MS/MS	By MS/MS	By MS/MS	By MS/MS	By MS/MS	By MS/MS	By MS/MS	By MS/MS	3922000000	4760300000	4255400000	3558800000	3385300000	3125200000	3112900000	4038600000
P15559	P15559	8	8	8	NAD(P)H dehydrogenase [quinone] 1	NQO1	1	32.8	32.8	32.8	30.867	274	0	51.132	By MS/MS	By MS/MS	By MS/MS	By MS/MS	By MS/MS	By MS/MS	By MS/MS	By MS/MS	848630000	1025700000	662210000	588680000	369590000	384120000	303440000	379170000
P15586	P15586	5	5	5	N-acetylglucosamine-6-sulfatase	GNS	1	12.7	12.7	12.7	62.081	552	0	12.661	By MS/MS	By MS/MS	By MS/MS	By MS/MS	By MS/MS	By MS/MS	By MS/MS	By MS/MS	94159000	88198000	126130000	65654000	55753000	55584000	75605000	51139000
P15880	P15880	19	19	19	40S ribosomal protein S2	RPS2	1	61.1	61.1	61.1	31.324	293	0	117.28	By MS/MS	By MS/MS	By MS/MS	By MS/MS	By MS/MS	By MS/MS	By MS/MS	By MS/MS	18410000000	19261000000	14676000000	13242000000	14284000000	13698000000	16813000000	16587000000
P15927	P15927	7	7	7	Replication protein A 32 kDa subunit	RPA2	1	41.9	41.9	41.9	29.247	270	0	39.877	By MS/MS	By MS/MS	By MS/MS	By MS/MS	By MS/MS	By MS/MS	By MS/MS	By MS/MS	1129200000	1109800000	872650000	969160000	922370000	1249400000	1426800000	1332600000
P15954	P15954	2	2	2	Cytochrome c oxidase subunit 7C, mitochondrial	COX7C	1	28.6	28.6	28.6	7.2454	63	0.00028321	4.7618	By MS/MS	By MS/MS	By MS/MS	By MS/MS	By MS/MS	By MS/MS	By MS/MS	By MS/MS	234360000	250400000	180630000	202240000	184650000	172550000	219970000	174440000
P16070	P16070	9	9	9	CD44 antigen	CD44	1	11.6	11.6	11.6	81.537	742	0	103.68	By MS/MS	By MS/MS	By MS/MS	By MS/MS	By MS/MS	By MS/MS	By MS/MS	By MS/MS	2695100000	3569600000	3012700000	2257000000	2738100000	2586800000	3167600000	3038700000
P16104	P16104	8	3	2	Histone H2AX	H2AFX	1	64.3	28	11.9	15.144	143	0	22.612	By MS/MS	By MS/MS	By matching	By MS/MS	By matching	By MS/MS	By MS/MS	By matching	296080000	61341000	132380000	229760000	134350000	352150000	155320000	28616000
P16144	P16144	38	38	38	Integrin beta-4	ITGB4	1	29.6	29.6	29.6	202.16	1822	0	169.77	By MS/MS	By MS/MS	By MS/MS	By MS/MS	By MS/MS	By MS/MS	By MS/MS	By MS/MS	1497800000	1665200000	1347700000	1109000000	637720000	718280000	852360000	738850000
P16152	P16152	15	15	13	Carbonyl reductase [NADPH] 1	CBR1	1	70.8	70.8	60.3	30.375	277	0	209.31	By MS/MS	By MS/MS	By MS/MS	By MS/MS	By MS/MS	By MS/MS	By MS/MS	By MS/MS	1863600000	2105500000	1660100000	1529100000	1374000000	1383000000	1683000000	1508800000
P16220;P18846	P16220;P18846	4;2	4;2	4;2	Cyclic AMP-responsive element-binding protein 1;Cyclic AMP-dependent transcription factor ATF-1	CREB1;ATF1	2	17.3	17.3	17.3	36.688	341	0.002775	2.7202	By MS/MS	By MS/MS	By MS/MS	By matching	By MS/MS	By MS/MS	By matching	By matching	118430000	168780000	114600000	61144000	95808000	41609000	77447000	65969000
P16278	P16278	2	2	2	Beta-galactosidase	GLB1	1	5.9	5.9	5.9	76.074	677	0	9.0343	By MS/MS	By MS/MS	By MS/MS	By MS/MS	By MS/MS	By MS/MS	By MS/MS	By MS/MS	18432000	57844000	24231000	15829000	20036000	24901000		26960000
P16383	P16383	4	4	4	GC-rich sequence DNA-binding factor 2	GCFC2	1	6.5	6.5	6.5	89.384	781	0.001567	3.1888	By matching		By MS/MS	By MS/MS			By MS/MS	By MS/MS	27222000		18017000	7151700			747870000	26456000
P16401	P16401	11	8	8	Histone H1.5	HIST1H1B	1	39.4	28.3	28.3	22.58	226	0	49.174	By MS/MS	By MS/MS	By MS/MS	By MS/MS	By MS/MS	By MS/MS	By MS/MS	By MS/MS	2528000000	2557300000	2485000000	2428200000	2298200000	3590200000	2902400000	2604600000
P16402	P16402	15	6	6	Histone H1.3	HIST1H1D	1	43	18.6	18.6	22.35	221	0	20.427	By MS/MS	By MS/MS	By MS/MS	By MS/MS	By MS/MS	By MS/MS	By MS/MS	By MS/MS	1206200000	900840000	757850000	1095500000	854910000	1898300000	1012500000	800350000
P16403	P16403	17	17	7	Histone H1.2	HIST1H1C	1	49.3	49.3	19.7	21.364	213	0	72.623	By MS/MS	By MS/MS	By MS/MS	By MS/MS	By MS/MS	By MS/MS	By MS/MS	By MS/MS	25204000000	21116000000	17758000000	16245000000	18880000000	19898000000	20891000000	18699000000
P16435	P16435	15	15	15	NADPH--cytochrome P450 reductase	POR	1	29.1	29.1	29.1	76.689	677	0	31.066	By MS/MS	By MS/MS	By MS/MS	By MS/MS	By MS/MS	By MS/MS	By MS/MS	By MS/MS	374030000	391040000	279820000	271230000	227740000	196010000	419160000	350770000
P16520	P16520	3	1	1	Guanine nucleotide-binding protein G(I)/G(S)/G(T) subunit beta-3	GNB3	1	7.1	2.1	2.1	37.221	340	1	-2	By MS/MS	By matching	By matching	By matching	By matching	By MS/MS	By matching	By MS/MS	465150000					472340000		542370000
P16615;O14983;Q93084	P16615	45;13;10	45;13;10	45;13;10	Sarcoplasmic/endoplasmic reticulum calcium ATPase 2	ATP2A2	3	43.7	43.7	43.7	114.76	1042	0	323.31	By MS/MS	By MS/MS	By MS/MS	By MS/MS	By MS/MS	By MS/MS	By MS/MS	By MS/MS	4864600000	5471300000	3947900000	3334300000	4018500000	3201800000	3796100000	4535700000
P16930	P16930	7	7	7	Fumarylacetoacetase	FAH	1	20.5	20.5	20.5	46.374	419	0	12.835	By MS/MS	By MS/MS	By MS/MS	By MS/MS	By MS/MS	By MS/MS	By MS/MS	By MS/MS	141590000	186130000	132120000	83857000	44837000	97816000	124570000	93844000
P16949;Q9H169	P16949	16;1	16;1	13;0	Stathmin	STMN1	2	68.5	68.5	57	17.302	149	0	141.08	By MS/MS	By MS/MS	By MS/MS	By MS/MS	By MS/MS	By MS/MS	By MS/MS	By MS/MS	9218200000	9650000000	7492400000	7542700000	6081900000	6630200000	6064400000	4837700000
P16989	P16989	15	10	10	Y-box-binding protein 3	YBX3	1	65.3	61	61	40.089	372	0	304.68	By MS/MS	By MS/MS	By MS/MS	By MS/MS	By MS/MS	By MS/MS	By MS/MS	By MS/MS	827240000	1062500000	873610000	788460000	833210000	679010000	847580000	857760000
P17066;P48741	P17066;P48741	10;5	1;1	1;1	Heat shock 70 kDa protein 6;Putative heat shock 70 kDa protein 7	HSPA6;HSPA7	2	14.5	1.7	1.7	71.027	643	0	10.076	By MS/MS	By MS/MS	By MS/MS	By MS/MS	By MS/MS	By MS/MS	By MS/MS	By MS/MS	6436200000	6632700000	5621000000	4686300000	5160400000	4308300000	5158500000	5184200000
P17096	P17096	9	9	9	High mobility group protein HMG-I/HMG-Y	HMGA1	1	58.9	58.9	58.9	11.676	107	0	110.66	By MS/MS	By MS/MS	By MS/MS	By MS/MS	By MS/MS	By MS/MS	By MS/MS	By MS/MS	4229200000	3610100000	3093100000	3609700000	2435000000	4836900000	4187200000	3291600000
P17152	P17152	2	2	2	Transmembrane protein 11, mitochondrial	TMEM11	1	13	13	13	21.541	192	0.0015645	3.1719	By MS/MS	By MS/MS	By matching	By matching	By MS/MS	By MS/MS	By MS/MS	By MS/MS	56298000	64471000	42129000	40933000	50462000	61967000	72423000	70847000
P17174	P17174	19	19	19	Aspartate aminotransferase, cytoplasmic	GOT1	1	57.1	57.1	57.1	46.247	413	0	263.28	By MS/MS	By MS/MS	By MS/MS	By MS/MS	By MS/MS	By MS/MS	By MS/MS	By MS/MS	1501600000	1331100000	1140900000	884800000	1209000000	1314300000	1686700000	1582900000
P17252;P05771	P17252	6;2	6;2	6;2	Protein kinase C alpha type	PRKCA	2	13.2	13.2	13.2	76.749	672	0	16.635	By MS/MS	By MS/MS	By MS/MS	By MS/MS	By MS/MS	By MS/MS	By MS/MS	By MS/MS	122360000	164530000	99363000	79964000	13322000	93076000	40749000	58000000
P17275	P17275	4	4	4	Transcription factor jun-B	JUNB	1	22.8	22.8	22.8	35.879	347	0	197.8	By matching	By matching	By MS/MS	By matching	By MS/MS	By MS/MS	By MS/MS	By MS/MS	16971000	25546000	15917000	40674000	80370000	101250000	107120000	130710000
P17301	P17301	8	8	8	Integrin alpha-2	ITGA2	1	8.3	8.3	8.3	129.29	1181	0	13.279	By MS/MS	By MS/MS	By MS/MS	By MS/MS	By MS/MS	By MS/MS	By MS/MS	By MS/MS	240860000	265450000	225750000	191050000	133240000	107850000	111890000	112120000
P17480	P17480	17	17	17	Nucleolar transcription factor 1	UBTF	1	25	25	25	89.405	764	0	39.168	By MS/MS	By MS/MS	By MS/MS	By MS/MS	By MS/MS	By MS/MS	By MS/MS	By MS/MS	407420000	451310000	548380000	302720000	519290000	478030000	339530000	425580000
P17535	P17535	3	3	2	Transcription factor jun-D	JUND	1	8.6	8.6	6.3	35.173	347	0	23.536	By MS/MS	By MS/MS	By MS/MS	By MS/MS	By MS/MS	By MS/MS	By MS/MS	By MS/MS	103510000	146130000	42815000	42238000	29403000		92524000	98367000
P17568	P17568	2	2	2	NADH dehydrogenase [ubiquinone] 1 beta subcomplex subunit 7	NDUFB7	1	17.5	17.5	17.5	16.402	137	0	19.432	By MS/MS	By MS/MS	By MS/MS	By matching		By MS/MS	By MS/MS	By matching	56120000	65811000	16684000	69026000		40888000	45636000	46131000
P17612	P17612	7	7	2	cAMP-dependent protein kinase catalytic subunit alpha	PRKACA	1	20.2	20.2	8.3	40.589	351	0	23.541	By MS/MS	By MS/MS	By MS/MS	By MS/MS	By MS/MS	By MS/MS	By MS/MS	By MS/MS	302770000	347060000	308800000	226520000	192800000	216030000	211700000	251350000
P17655	P17655	33	33	33	Calpain-2 catalytic subunit	CAPN2	1	61.4	61.4	61.4	79.994	700	0	323.31	By MS/MS	By MS/MS	By MS/MS	By MS/MS	By MS/MS	By MS/MS	By MS/MS	By MS/MS	3602300000	3791900000	3112100000	3066800000	2786800000	2931800000	3173500000	3542300000
P17676	P17676	2	2	2	CCAAT/enhancer-binding protein beta	CEBPB	1	8.1	8.1	8.1	36.105	345	0	34.994	By MS/MS	By MS/MS	By MS/MS	By MS/MS	By MS/MS	By MS/MS	By MS/MS	By MS/MS	17724000		14324000	49564000	92186000	94078000	120740000	107760000
P17812	P17812	29	29	27	CTP synthase 1	CTPS1	1	59.9	59.9	55.5	66.69	591	0	274.32	By MS/MS	By MS/MS	By MS/MS	By MS/MS	By MS/MS	By MS/MS	By MS/MS	By MS/MS	4031100000	3909900000	3675700000	3001400000	3525800000	3410800000	4272000000	4344300000
P17813	P17813	4	4	4	Endoglin	ENG	1	9	9	9	70.577	658	0	22.821	By MS/MS	By MS/MS	By MS/MS	By MS/MS		By MS/MS	By matching	By MS/MS	61706000	116000000	34464000	48722000		36921000	16400000	22114000
P17844	P17844	40	40	30	Probable ATP-dependent RNA helicase DDX5	DDX5	1	61.4	61.4	47.1	69.147	614	0	286.65	By MS/MS	By MS/MS	By MS/MS	By MS/MS	By MS/MS	By MS/MS	By MS/MS	By MS/MS	10692000000	12760000000	11274000000	8484100000	8173800000	7795000000	10392000000	9193500000
P17858	P17858	11	7	7	ATP-dependent 6-phosphofructokinase, liver type	PFKL	1	22.3	16.4	16.4	85.018	780	0	35.905	By MS/MS	By MS/MS	By MS/MS	By MS/MS	By MS/MS	By MS/MS	By MS/MS	By MS/MS	186750000	262970000	195060000	192920000	162060000	135220000	123500000	129970000
P17931	P17931	6	6	6	Galectin-3	LGALS3	1	29.6	29.6	29.6	26.152	250	0	19.438	By MS/MS	By MS/MS	By MS/MS	By MS/MS	By MS/MS	By MS/MS	By MS/MS	By MS/MS	572800000	657750000	525640000	482860000	439750000	542460000	592640000	532680000
P17980	P17980	22	22	22	26S protease regulatory subunit 6A	PSMC3	1	58.8	58.8	58.8	49.203	439	0	174.14	By MS/MS	By MS/MS	By MS/MS	By MS/MS	By MS/MS	By MS/MS	By MS/MS	By MS/MS	1935100000	2236400000	2120600000	1512500000	1618600000	1591800000	1650800000	1883900000
P17987	P17987	37	37	37	T-complex protein 1 subunit alpha	TCP1	1	79.5	79.5	79.5	60.343	556	0	323.31	By MS/MS	By MS/MS	By MS/MS	By MS/MS	By MS/MS	By MS/MS	By MS/MS	By MS/MS	12010000000	12661000000	9609100000	8910600000	9458800000	10825000000	11534000000	11078000000
P18031	P18031	21	21	21	Tyrosine-protein phosphatase non-receptor type 1	PTPN1	1	59.8	59.8	59.8	49.966	435	0	132.35	By MS/MS	By MS/MS	By MS/MS	By MS/MS	By MS/MS	By MS/MS	By MS/MS	By MS/MS	983910000	1324400000	946630000	714460000	944180000	768240000	1148400000	980940000
P18074	P18074	2	2	2	TFIIH basal transcription factor complex helicase XPD subunit	ERCC2	1	4.6	4.6	4.6	86.908	760	0.00029647	5.7407	By matching	By matching	By MS/MS	By MS/MS	By matching	By matching	By matching	By matching	28526000	10218000	30276000	8145300	18927000	6781000	27629000	23290000
P18077	P18077	13	13	13	60S ribosomal protein L35a	RPL35A	1	57.3	57.3	57.3	12.538	110	0	35.847	By MS/MS	By MS/MS	By MS/MS	By MS/MS	By MS/MS	By MS/MS	By MS/MS	By MS/MS	6882500000	7246400000	5988600000	5512700000	5973000000	6007200000	6747100000	6286600000
P18084	P18084	3	3	3	Integrin beta-5	ITGB5	1	7	7	7	88.053	799	0.00031104	6.824	By MS/MS	By MS/MS	By MS/MS	By MS/MS		By matching	By matching	By matching	63839000	60291000	47021000	34338000		21352000	36365000	18974000
P18085	P18085	12	7	7	ADP-ribosylation factor 4	ARF4	1	65.6	35.6	35.6	20.511	180	0	34.949	By MS/MS	By MS/MS	By MS/MS	By MS/MS	By MS/MS	By MS/MS	By MS/MS	By MS/MS	1583300000	2170200000	1716000000	1236200000	1203100000	1050100000	1019100000	1555300000
P18124	P18124	23	23	23	60S ribosomal protein L7	RPL7	1	62.9	62.9	62.9	29.225	248	0	118.84	By MS/MS	By MS/MS	By MS/MS	By MS/MS	By MS/MS	By MS/MS	By MS/MS	By MS/MS	13471000000	13181000000	13027000000	10377000000	12111000000	14027000000	17849000000	14377000000
P18206	P18206	56	56	56	Vinculin	VCL	1	58.7	58.7	58.7	123.8	1134	0	323.31	By MS/MS	By MS/MS	By MS/MS	By MS/MS	By MS/MS	By MS/MS	By MS/MS	By MS/MS	6811600000	7019500000	6047300000	5324100000	3907600000	4880800000	6695200000	4656400000
P18583	P18583	22	22	22	Protein SON	SON	1	15.6	15.6	15.6	263.83	2426	0	74.836	By MS/MS	By MS/MS	By MS/MS	By MS/MS	By MS/MS	By MS/MS	By MS/MS	By MS/MS	546160000	379180000	535530000	415720000	445130000	329560000	481080000	421640000
P18615	P18615	4	4	4	Negative elongation factor E	NELFE	1	17.4	17.4	17.4	43.239	380	0	25.984	By MS/MS	By MS/MS	By MS/MS	By MS/MS	By MS/MS	By MS/MS	By MS/MS	By MS/MS	75734000	51388000	21848000	43703000	67678000	89831000	78883000	70008000
P18621	P18621	13	13	13	60S ribosomal protein L17	RPL17	1	53.8	53.8	53.8	21.397	184	0	156.23	By MS/MS	By MS/MS	By MS/MS	By MS/MS	By MS/MS	By MS/MS	By MS/MS	By MS/MS	6730300000	7343500000	5550600000	5168000000	6260500000	7062700000	7389200000	6097700000
P18669;P15259;Q8N0Y7	P18669	21;7;6	21;7;6	21;7;6	Phosphoglycerate mutase 1	PGAM1	3	72.4	72.4	72.4	28.804	254	0	323.31	By MS/MS	By MS/MS	By MS/MS	By MS/MS	By MS/MS	By MS/MS	By MS/MS	By MS/MS	10648000000	11753000000	9970600000	8024800000	8485300000	8325400000	10412000000	9370200000
P18754	P18754	16	16	16	Regulator of chromosome condensation	RCC1	1	58.4	58.4	58.4	44.969	421	0	306.76	By MS/MS	By MS/MS	By MS/MS	By MS/MS	By MS/MS	By MS/MS	By MS/MS	By MS/MS	2115100000	2508600000	1941800000	1691100000	1744400000	1875300000	1857400000	1836900000
P18858	P18858	6	6	6	DNA ligase 1	LIG1	1	9.8	9.8	9.8	101.73	919	0	37.765	By MS/MS	By MS/MS	By MS/MS	By MS/MS	By MS/MS	By MS/MS	By MS/MS	By MS/MS	181240000	192100000	158960000	96368000	115120000	110770000	46048000	149180000
P18859	P18859	5	5	5	ATP synthase-coupling factor 6, mitochondrial	ATP5J	1	49.1	49.1	49.1	12.587	108	0	105.28	By MS/MS	By MS/MS	By MS/MS	By MS/MS	By MS/MS	By MS/MS	By MS/MS	By MS/MS	482850000	604180000	359150000	373960000	432880000	478630000	546350000	506290000
P18887	P18887	8	8	8	DNA repair protein XRCC1	XRCC1	1	15.8	15.8	15.8	69.476	633	0	15.752	By MS/MS	By MS/MS	By MS/MS	By MS/MS	By MS/MS	By MS/MS	By MS/MS	By MS/MS	161800000	147150000	229340000	144250000	211260000	201240000	244380000	238690000
P19013	P19013	8	5	3	Keratin, type II cytoskeletal 4	KRT4	1	19.7	14.8	10.3	57.285	534	0	16.766	By matching	By MS/MS	By matching	By MS/MS	By matching	By matching	By matching	By matching		182210000		61664000
P19022;P55283	P19022	4;1	4;1	4;1	Cadherin-2	CDH2	2	9.9	9.9	9.9	99.808	906	0	51.481	By MS/MS	By MS/MS	By MS/MS	By MS/MS	By MS/MS	By MS/MS	By MS/MS	By MS/MS	110710000	162960000	124890000	81138000	89964000	77364000	65044000	145770000
P19105;O14950;P24844	P19105;O14950;P24844	9;9;5	9;9;5	9;9;5	Myosin regulatory light chain 12A;Myosin regulatory light chain 12B;Myosin regulatory light polypeptide 9	MYL12A;MYL12B;MYL9	3	62.6	62.6	62.6	19.794	171	0	133.72	By MS/MS	By MS/MS	By MS/MS	By MS/MS	By MS/MS	By MS/MS	By MS/MS	By MS/MS	1342800000	1785600000	1381100000	1210400000	1169700000	1221400000	1089600000	1350900000
P19174	P19174	8	8	8	1-phosphatidylinositol 4,5-bisphosphate phosphodiesterase gamma-1	PLCG1	1	8.3	8.3	8.3	148.53	1290	0	40.942	By MS/MS	By MS/MS	By MS/MS	By MS/MS	By MS/MS	By MS/MS	By MS/MS	By MS/MS	161660000	66379000	100400000	146320000	74207000	50352000	82826000	111570000
P19338	P19338	51	51	51	Nucleolin	NCL	1	45.9	45.9	45.9	76.613	710	0	323.31	By MS/MS	By MS/MS	By MS/MS	By MS/MS	By MS/MS	By MS/MS	By MS/MS	By MS/MS	24370000000	23793000000	20549000000	19399000000	20253000000	24822000000	25526000000	22480000000
P19367;Q2TB90	P19367	27;2	23;1	23;1	Hexokinase-1	HK1	2	34.2	30.1	30.1	102.48	917	0	199.13	By MS/MS	By MS/MS	By MS/MS	By MS/MS	By MS/MS	By MS/MS	By MS/MS	By MS/MS	964920000	1164200000	1001000000	621600000	1244700000	1026400000	1483600000	1483700000
P19387	P19387	8	8	8	DNA-directed RNA polymerase II subunit RPB3	POLR2C	1	41.8	41.8	41.8	31.441	275	0	27.645	By MS/MS	By MS/MS	By MS/MS	By MS/MS	By MS/MS	By MS/MS	By MS/MS	By MS/MS	290980000	285640000	260910000	138270000	108650000	172890000	313830000	212660000
P19388	P19388	9	9	9	DNA-directed RNA polymerases I, II, and III subunit RPABC1	POLR2E	1	49	49	49	24.551	210	0	63.447	By MS/MS	By MS/MS	By MS/MS	By MS/MS	By MS/MS	By MS/MS	By MS/MS	By MS/MS	321180000	364510000	316700000	289820000	249050000	229540000	153550000	244800000
P19404	P19404	4	4	4	NADH dehydrogenase [ubiquinone] flavoprotein 2, mitochondrial	NDUFV2	1	21.7	21.7	21.7	27.391	249	0	10.651	By MS/MS	By MS/MS	By MS/MS	By MS/MS	By MS/MS	By MS/MS	By MS/MS	By MS/MS	184890000	136710000	131260000	108340000	90789000	69299000	144620000	63252000
P19447	P19447	3	3	3	TFIIH basal transcription factor complex helicase XPB subunit	ERCC3	1	7.7	7.7	7.7	89.277	782	0.00031133	6.8318	By matching	By matching	By MS/MS	By MS/MS	By matching	By MS/MS			98580000	21116000	70572000	31011000	9975700	80189000
P19474	P19474	2	2	2	E3 ubiquitin-protein ligase TRIM21	TRIM21	1	8.8	8.8	8.8	54.169	475	0.00027755	4.2925	By matching				By MS/MS	By MS/MS	By MS/MS	By MS/MS	29743000				96356000	86805000	102670000	109310000
P19525	P19525	19	19	19	Interferon-induced, double-stranded RNA-activated protein kinase	EIF2AK2	1	42.1	42.1	42.1	62.094	551	0	111.91	By MS/MS	By MS/MS	By MS/MS	By MS/MS	By MS/MS	By MS/MS	By MS/MS	By MS/MS	1258100000	1394000000	1194700000	921030000	1465000000	1435500000	1533800000	1584700000
P19532;O14948;P19484;O75030	P19532	3;1;1;1	3;1;1;1	3;1;1;1	Transcription factor E3	TFE3	4	11.8	11.8	11.8	61.52	575	0.0066906	2.0454	By matching	By matching		By MS/MS	By matching	By matching	By MS/MS	By matching	8691100	122150000		83861000	11770000	25453000	19981000	134650000
P19623	P19623	16	16	16	Spermidine synthase	SRM	1	65.9	65.9	65.9	33.824	302	0	224.35	By MS/MS	By MS/MS	By MS/MS	By MS/MS	By MS/MS	By MS/MS	By MS/MS	By MS/MS	1824600000	2066100000	2009500000	1568600000	1819600000	1954000000	2106500000	1776400000
P19784	P19784	11	11	11	Casein kinase II subunit alpha	CSNK2A2	1	44.6	44.6	44.6	41.213	350	0	30.534	By MS/MS	By MS/MS	By MS/MS	By MS/MS	By MS/MS	By MS/MS	By MS/MS	By MS/MS	332010000	272700000	170960000	141550000	285750000	157310000	263870000	174550000
P19838	P19838	7	7	7	Nuclear factor NF-kappa-B p105 subunit;Nuclear factor NF-kappa-B p50 subunit	NFKB1	1	11.9	11.9	11.9	105.35	968	0	17.86	By MS/MS	By MS/MS	By MS/MS	By MS/MS	By MS/MS	By MS/MS	By MS/MS	By MS/MS	94055000	133150000	118270000	68211000	71112000	82328000	83259000	120270000
P20020	P20020	10	10	7	Plasma membrane calcium-transporting ATPase 1	ATP2B1	1	12.8	12.8	9.1	138.75	1258	0	19.903	By MS/MS	By MS/MS	By MS/MS	By MS/MS	By MS/MS	By MS/MS	By MS/MS	By MS/MS	122530000	180900000	99857000	146660000	165910000	176110000	179830000	145670000
P20036	P20036	3	3	3	HLA class II histocompatibility antigen, DP alpha 1 chain	HLA-DPA1	1	11.2	11.2	11.2	29.38	260	0	11.562	By matching	By matching			By MS/MS	By MS/MS	By MS/MS	By MS/MS	3827900	11211000			155570000	145130000	135790000	193500000
P20042	P20042	19	19	19	Eukaryotic translation initiation factor 2 subunit 2	EIF2S2	1	55.6	55.6	55.6	38.388	333	0	223.46	By MS/MS	By MS/MS	By MS/MS	By MS/MS	By MS/MS	By MS/MS	By MS/MS	By MS/MS	2443000000	2627600000	2106000000	1878500000	2384300000	2481300000	2597700000	2721400000
P20073	P20073	15	15	15	Annexin A7	ANXA7	1	35.5	35.5	35.5	52.739	488	0	83.776	By MS/MS	By MS/MS	By MS/MS	By MS/MS	By MS/MS	By MS/MS	By MS/MS	By MS/MS	1009700000	881030000	659740000	641340000	798650000	971050000	861350000	989460000
P20290	P20290	12	12	12	Transcription factor BTF3	BTF3	1	71.8	71.8	71.8	22.168	206	0	323.31	By MS/MS	By MS/MS	By MS/MS	By MS/MS	By MS/MS	By MS/MS	By MS/MS	By MS/MS	3055100000	3429500000	3348700000	2822100000	2864700000	2711100000	2198900000	2715100000
P20339	P20339	8	5	5	Ras-related protein Rab-5A	RAB5A	1	53.5	38.6	38.6	23.658	215	0	19.426	By MS/MS	By MS/MS	By MS/MS	By MS/MS	By MS/MS	By MS/MS	By MS/MS	By MS/MS	56859000	148010000	76451000	103310000	113330000	102640000	65618000	86535000
P20340;Q9NRW1;Q14964	P20340;Q9NRW1	8;4;1	8;4;1	8;4;1	Ras-related protein Rab-6A;Ras-related protein Rab-6B	RAB6A;RAB6B	3	42.8	42.8	42.8	23.593	208	0	36.908	By MS/MS	By MS/MS	By MS/MS	By MS/MS	By MS/MS	By MS/MS	By MS/MS	By MS/MS	1129900000	1193200000	926230000	855080000	807950000	900920000	966640000	824080000
P20585	P20585	6	6	6	DNA mismatch repair protein Msh3	MSH3	1	8.1	8.1	8.1	127.41	1137	0	27.494	By MS/MS	By matching	By MS/MS	By MS/MS	By MS/MS	By MS/MS	By MS/MS	By MS/MS	115080000	51342000	52823000	39176000	36266000	53019000	104910000	110640000
P20618	P20618	12	12	12	Proteasome subunit beta type-1	PSMB1	1	60.2	60.2	60.2	26.489	241	0	164.58	By MS/MS	By MS/MS	By MS/MS	By MS/MS	By MS/MS	By MS/MS	By MS/MS	By MS/MS	3144200000	3619300000	2069200000	2071400000	3172400000	3418300000	4808100000	3730800000
P20645	P20645	6	6	6	Cation-dependent mannose-6-phosphate receptor	M6PR	1	28.5	28.5	28.5	30.993	277	0	61.971	By MS/MS	By MS/MS	By MS/MS	By MS/MS	By MS/MS	By MS/MS	By MS/MS	By MS/MS	701890000	805970000	596360000	573830000	684590000	669260000	735820000	722170000
P20674	P20674	5	5	5	Cytochrome c oxidase subunit 5A, mitochondrial	COX5A	1	27.3	27.3	27.3	16.762	150	0	13.853	By MS/MS	By MS/MS	By MS/MS	By MS/MS	By MS/MS	By matching	By MS/MS	By MS/MS	915140000	1304300000	861820000	526890000	482780000	469210000	725490000	540320000
P20700	P20700	53	51	48	Lamin-B1	LMNB1	1	76.1	74.6	71	66.408	586	0	323.31	By MS/MS	By MS/MS	By MS/MS	By MS/MS	By MS/MS	By MS/MS	By MS/MS	By MS/MS	9060900000	9692100000	7314100000	6246000000	7044700000	6790600000	9041300000	7476800000
P20810	P20810	26	26	26	Calpastatin	CAST	1	52.7	52.7	52.7	76.572	708	0	261.56	By MS/MS	By MS/MS	By MS/MS	By MS/MS	By MS/MS	By MS/MS	By MS/MS	By MS/MS	1433200000	1650000000	1191300000	1133000000	1450000000	1522200000	1202200000	1220400000
P20839	P20839	14	11	11	Inosine-5-monophosphate dehydrogenase 1	IMPDH1	1	34.6	31.3	31.3	55.405	514	0	20.013	By MS/MS	By MS/MS	By MS/MS	By MS/MS	By MS/MS	By MS/MS	By MS/MS	By MS/MS	346210000	537570000	445350000	299150000	249260000	162780000	270750000	196400000
P20929	P20929	5	5	5	Nebulin	NEB	1	0.9	0.9	0.9	772.91	6669	0.0036946	2.4051	By matching	By MS/MS	By MS/MS	By matching	By MS/MS	By matching	By matching	By MS/MS	1483100000	1843000000	1820900000	176680000	211420000	165600000	261180000	385710000
P20933	P20933	2	2	2	N(4)-(beta-N-acetylglucosaminyl)-L-asparaginase;Glycosylasparaginase alpha chain;Glycosylasparaginase beta chain	AGA	1	6.6	6.6	6.6	37.208	346	0.0032492	2.5906	By MS/MS	By MS/MS	By MS/MS		By matching	By MS/MS	By MS/MS	By MS/MS	39390000	47107000	29639000		19923000	31266000	39322000	29190000
P20936	P20936	8	8	8	Ras GTPase-activating protein 1	RASA1	1	11.1	11.1	11.1	116.4	1047	0	12.753	By MS/MS	By MS/MS	By MS/MS	By MS/MS	By MS/MS	By MS/MS	By MS/MS	By MS/MS	111780000	121710000	51612000	114420000	61166000	37156000	86190000	78214000
P20962	P20962	4	4	4	Parathymosin	PTMS	1	23.5	23.5	23.5	11.53	102	0	14.987	By MS/MS	By MS/MS	By MS/MS	By MS/MS	By MS/MS	By MS/MS	By MS/MS	By MS/MS	1451400000	1410500000	1621700000	1568800000	1355600000	1265700000	1193700000	1650000000
P21127;Q9UQ88	P21127;Q9UQ88	14;13	14;13	14;13	Cyclin-dependent kinase 11B;Cyclin-dependent kinase 11A	CDK11B;CDK11A	2	18.7	18.7	18.7	92.706	795	0	23.331	By MS/MS	By MS/MS	By MS/MS	By MS/MS	By MS/MS	By MS/MS	By MS/MS	By MS/MS	263400000	349820000	231050000	202770000	216420000	207040000	320000000	226520000
P21266	P21266	10	10	9	Glutathione S-transferase Mu 3	GSTM3	1	43.6	43.6	39.6	26.559	225	0	19.314	By MS/MS	By MS/MS	By MS/MS	By MS/MS	By MS/MS	By MS/MS	By MS/MS	By MS/MS	253340000	219350000	230350000	186050000	133660000	140930000	114440000	157490000
P21281;P15313	P21281	17;5	17;5	17;5	V-type proton ATPase subunit B, brain isoform	ATP6V1B2	2	41.5	41.5	41.5	56.5	511	0	62.302	By MS/MS	By MS/MS	By MS/MS	By MS/MS	By MS/MS	By MS/MS	By MS/MS	By MS/MS	549710000	552100000	480670000	457710000	567160000	598000000	701680000	936420000
P21283	P21283	6	6	6	V-type proton ATPase subunit C 1	ATP6V1C1	1	16.5	16.5	16.5	43.941	382	0	9.1933	By MS/MS	By MS/MS	By MS/MS	By MS/MS	By MS/MS	By MS/MS	By MS/MS	By MS/MS	184440000	256620000	162530000	161580000	172290000	127060000	112040000	181730000
P21291	P21291	9	9	9	Cysteine and glycine-rich protein 1	CSRP1	1	64.8	64.8	64.8	20.567	193	0	146.88	By MS/MS	By MS/MS	By MS/MS	By MS/MS	By MS/MS	By MS/MS	By MS/MS	By MS/MS	1612200000	2355600000	1950600000	1552900000	1970100000	1924300000	1844600000	2310300000
P21333	P21333	141	130	126	Filamin-A	FLNA	1	65.8	62.9	61.9	280.74	2647	0	323.31	By MS/MS	By MS/MS	By MS/MS	By MS/MS	By MS/MS	By MS/MS	By MS/MS	By MS/MS	28560000000	31925000000	25645000000	21486000000	27957000000	25893000000	31801000000	28937000000
P21399;O00408	P21399	18;1	18;1	18;1	Cytoplasmic aconitate hydratase	ACO1	2	27.2	27.2	27.2	98.398	889	0	72.794	By MS/MS	By MS/MS	By MS/MS	By MS/MS	By MS/MS	By MS/MS	By MS/MS	By MS/MS	524270000	549030000	494420000	358580000	356240000	442570000	532190000	457490000
P21589	P21589	10	10	10	5-nucleotidase	NT5E	1	23.2	23.2	23.2	63.367	574	0	41.43	By MS/MS	By MS/MS	By MS/MS	By MS/MS	By MS/MS	By MS/MS	By MS/MS	By MS/MS	169910000	255390000	207730000	169720000	275390000	200810000	190720000	128640000
P21796	P21796	17	17	17	Voltage-dependent anion-selective channel protein 1	VDAC1	1	75.6	75.6	75.6	30.772	283	0	323.31	By MS/MS	By MS/MS	By MS/MS	By MS/MS	By MS/MS	By MS/MS	By MS/MS	By MS/MS	5103900000	5553400000	4314600000	3157900000	3845000000	3679800000	4116300000	4439600000
P21912	P21912	9	9	9	Succinate dehydrogenase [ubiquinone] iron-sulfur subunit, mitochondrial	SDHB	1	37.1	37.1	37.1	31.629	280	0	18.929	By MS/MS	By MS/MS	By MS/MS	By MS/MS	By MS/MS	By MS/MS	By MS/MS	By MS/MS	301120000	401790000	329710000	282820000	298630000	293360000	388800000	376850000
P21926	P21926	5	5	5	CD9 antigen	CD9	1	25.4	25.4	25.4	25.416	228	0	45.358	By MS/MS	By MS/MS	By MS/MS	By MS/MS	By MS/MS	By MS/MS	By MS/MS	By MS/MS	571150000	651940000	603930000	185840000	177450000	324710000	545460000	421010000
P21964	P21964	10	10	10	Catechol O-methyltransferase	COMT	1	49.8	49.8	49.8	30.037	271	0	64.063	By MS/MS	By MS/MS	By MS/MS	By MS/MS	By MS/MS	By MS/MS	By MS/MS	By MS/MS	684670000	756050000	568890000	456630000	458320000	438430000	572810000	570060000
P21980	P21980	33	33	31	Protein-glutamine gamma-glutamyltransferase 2	TGM2	1	58.8	58.8	57.8	77.328	687	0	323.31	By MS/MS	By MS/MS	By MS/MS	By MS/MS	By MS/MS	By MS/MS	By MS/MS	By MS/MS	6161100000	7444500000	5784200000	5143700000	5944000000	5863900000	6775500000	7041900000
P22059	P22059	14	14	12	Oxysterol-binding protein 1	OSBP	1	28	28	24.7	89.42	807	0	37.205	By MS/MS	By MS/MS	By MS/MS	By MS/MS	By MS/MS	By MS/MS	By MS/MS	By MS/MS	398960000	398670000	279020000	271920000	231270000	169130000	317250000	279710000
P22061	P22061	10	10	10	Protein-L-isoaspartate(D-aspartate) O-methyltransferase	PCMT1	1	59.5	59.5	59.5	24.636	227	0	47.462	By MS/MS	By MS/MS	By MS/MS	By MS/MS	By MS/MS	By MS/MS	By MS/MS	By MS/MS	642520000	947860000	828830000	676740000	702690000	603490000	571630000	665310000
P22087	P22087	18	18	17	rRNA 2-O-methyltransferase fibrillarin	FBL	1	55.1	55.1	51.7	33.784	321	0	181.63	By MS/MS	By MS/MS	By MS/MS	By MS/MS	By MS/MS	By MS/MS	By MS/MS	By MS/MS	3582100000	4662700000	3431200000	3114400000	3917100000	3716500000	3903500000	4132400000
P22102	P22102	39	39	39	Trifunctional purine biosynthetic protein adenosine-3;Phosphoribosylamine--glycine ligase;Phosphoribosylformylglycinamidine cyclo-ligase;Phosphoribosylglycinamide formyltransferase	GART	1	54	54	54	107.77	1010	0	296.23	By MS/MS	By MS/MS	By MS/MS	By MS/MS	By MS/MS	By MS/MS	By MS/MS	By MS/MS	5289200000	5595400000	4419000000	4293600000	4726300000	4350300000	5483900000	4950400000
P22234	P22234	30	30	30	Multifunctional protein ADE2;Phosphoribosylaminoimidazole-succinocarboxamide synthase;Phosphoribosylaminoimidazole carboxylase	PAICS	1	58.6	58.6	58.6	47.079	425	0	323.31	By MS/MS	By MS/MS	By MS/MS	By MS/MS	By MS/MS	By MS/MS	By MS/MS	By MS/MS	10246000000	10920000000	8531100000	7774800000	8172000000	9520600000	9560600000	8810700000
P22307	P22307	7	7	7	Non-specific lipid-transfer protein	SCP2	1	11.3	11.3	11.3	58.993	547	0	30.252	By MS/MS	By MS/MS	By MS/MS	By MS/MS	By MS/MS	By MS/MS	By MS/MS	By MS/MS	327060000	341750000	307730000	286270000	179370000	250220000	282490000	227970000
P22314	P22314	49	49	49	Ubiquitin-like modifier-activating enzyme 1	UBA1	1	59.3	59.3	59.3	117.85	1058	0	323.31	By MS/MS	By MS/MS	By MS/MS	By MS/MS	By MS/MS	By MS/MS	By MS/MS	By MS/MS	11942000000	13210000000	9878500000	8801400000	9385300000	9514700000	11799000000	11063000000
P22392;O60361	P22392;O60361	15;8	15;8	9;5	Nucleoside diphosphate kinase B;Putative nucleoside diphosphate kinase	NME2;NME2P1	2	84.2	84.2	53.3	17.298	152	0	172.97	By MS/MS	By MS/MS	By MS/MS	By MS/MS	By MS/MS	By MS/MS	By MS/MS	By MS/MS	18885000000	21366000000	18887000000	17257000000	16004000000	16915000000	17568000000	18059000000
P22415	P22415	2	2	2	Upstream stimulatory factor 1	USF1	1	6.5	6.5	6.5	33.538	310	0.0039254	2.3418	By MS/MS		By MS/MS	By MS/MS	By matching	By MS/MS		By MS/MS	30293000		28052000	34983000	29604000			42144000
P22570	P22570	6	6	6	NADPH:adrenodoxin oxidoreductase, mitochondrial	FDXR	1	20.6	20.6	20.6	53.836	491	0.0003096	6.7044	By MS/MS	By MS/MS	By MS/MS	By MS/MS	By matching	By matching	By matching	By MS/MS	85016000	118450000	68986000	52616000	34618000	33611000	54915000	13657000
P22612	P22612	2	1	1	cAMP-dependent protein kinase catalytic subunit gamma	PRKACG	1	9.4	6.8	6.8	40.434	351	0.00030211	6.118	By matching	By MS/MS	By MS/MS	By matching	By matching	By matching	By matching	By matching		71988000	58452000		46948000	58119000
P22626	P22626	34	34	33	Heterogeneous nuclear ribonucleoproteins A2/B1	HNRNPA2B1	1	75.9	75.9	75.9	37.429	353	0	323.31	By MS/MS	By MS/MS	By MS/MS	By MS/MS	By MS/MS	By MS/MS	By MS/MS	By MS/MS	50425000000	54486000000	44787000000	45225000000	44749000000	47055000000	47993000000	52519000000
P22670	P22670	2	2	2	MHC class II regulatory factor RFX1	RFX1	1	4	4	4	104.76	979	0.00033278	8.785	By matching	By MS/MS		By MS/MS	By MS/MS	By MS/MS			24336000	20317000			12448000
P22676;P05937	P22676	8;1	8;1	8;1	Calretinin	CALB2	2	28.8	28.8	28.8	31.54	271	0	42.586	By MS/MS	By MS/MS	By MS/MS	By MS/MS	By MS/MS	By MS/MS	By MS/MS	By MS/MS	296770000	399450000	325620000	288320000	318190000	408710000	239590000	422290000
P22681	P22681	8	8	8	E3 ubiquitin-protein ligase CBL	CBL	1	11.6	11.6	11.6	99.632	906	0.00032499	7.9847	By MS/MS	By MS/MS	By MS/MS	By MS/MS	By MS/MS	By MS/MS	By MS/MS	By MS/MS	78604000	72885000	31443000	60746000	36286000	38543000	65643000	83783000
P22694	P22694	6	1	1	cAMP-dependent protein kinase catalytic subunit beta	PRKACB	1	15.4	3.4	3.4	40.622	351	0.0027827	2.7412	By matching	By MS/MS	By MS/MS	By matching	By MS/MS	By MS/MS	By matching	By matching	15975000	17486000	13403000	10854000	12320000	11830000	14195000
P22695	P22695	14	14	14	Cytochrome b-c1 complex subunit 2, mitochondrial	UQCRC2	1	42.8	42.8	42.8	48.442	453	0	165.32	By MS/MS	By MS/MS	By MS/MS	By MS/MS	By MS/MS	By MS/MS	By MS/MS	By MS/MS	886840000	1065100000	974520000	756380000	658270000	703920000	904030000	925700000
P23193;Q15560	P23193	17;2	17;2	17;2	Transcription elongation factor A protein 1	TCEA1	2	56.5	56.5	56.5	33.969	301	0	119.97	By MS/MS	By MS/MS	By MS/MS	By MS/MS	By MS/MS	By MS/MS	By MS/MS	By MS/MS	884260000	1029800000	811820000	724770000	726830000	746110000	867700000	815410000
P23229	P23229	25	25	25	Integrin alpha-6;Integrin alpha-6 heavy chain;Integrin alpha-6 light chain;Processed integrin alpha-6	ITGA6	1	31.7	31.7	31.7	126.6	1130	0	212.69	By MS/MS	By MS/MS	By MS/MS	By MS/MS	By MS/MS	By MS/MS	By MS/MS	By MS/MS	650860000	789620000	665160000	466680000	426120000	441670000	467570000	513720000
P23246	P23246	43	43	42	Splicing factor, proline- and glutamine-rich	SFPQ	1	57.6	57.6	56.4	76.149	707	0	323.31	By MS/MS	By MS/MS	By MS/MS	By MS/MS	By MS/MS	By MS/MS	By MS/MS	By MS/MS	14971000000	16651000000	14108000000	11864000000	15392000000	15068000000	17848000000	16788000000
P23258;Q9NRH3	P23258;Q9NRH3	19;14	19;14	19;14	Tubulin gamma-1 chain;Tubulin gamma-2 chain	TUBG1;TUBG2	2	75.2	75.2	75.2	51.169	451	0	266.12	By MS/MS	By MS/MS	By MS/MS	By MS/MS	By MS/MS	By MS/MS	By MS/MS	By MS/MS	872410000	815760000	646910000	611150000	449660000	485240000	532310000	528140000
P23284	P23284	17	17	17	Peptidyl-prolyl cis-trans isomerase B	PPIB	1	62	62	62	23.742	216	0	137.81	By MS/MS	By MS/MS	By MS/MS	By MS/MS	By MS/MS	By MS/MS	By MS/MS	By MS/MS	8340600000	9255800000	8088200000	6601900000	8177600000	8199800000	7753200000	8633100000
P23297	P23297	2	2	2	Protein S100-A1	S100A1	1	45.7	45.7	45.7	10.546	94	0	28.661	By MS/MS	By MS/MS	By MS/MS	By MS/MS	By MS/MS	By MS/MS	By MS/MS	By MS/MS	167610000	159690000	114200000	136890000	75121000	93130000	105720000	127540000
P23368	P23368	11	11	11	NAD-dependent malic enzyme, mitochondrial	ME2	1	24.8	24.8	24.8	65.443	584	0	25.349	By MS/MS	By MS/MS	By MS/MS	By MS/MS	By MS/MS	By MS/MS	By MS/MS	By MS/MS	230960000	210280000	224930000	169870000	284480000	288540000	394190000	235940000
P23381	P23381	43	43	43	Tryptophan--tRNA ligase, cytoplasmic;T1-TrpRS;T2-TrpRS	WARS	1	83.2	83.2	83.2	53.165	471	0	323.31	By MS/MS	By MS/MS	By MS/MS	By MS/MS	By MS/MS	By MS/MS	By MS/MS	By MS/MS	3902600000	4388100000	3356600000	3269800000	102570000000	105130000000	128950000000	117100000000
P23396	P23396	26	26	26	40S ribosomal protein S3	RPS3	1	84.8	84.8	84.8	26.688	243	0	180.86	By MS/MS	By MS/MS	By MS/MS	By MS/MS	By MS/MS	By MS/MS	By MS/MS	By MS/MS	17892000000	20631000000	16639000000	13930000000	16407000000	16534000000	17976000000	17626000000
P23497	P23497	13	9	8	Nuclear autoantigen Sp-100	SP100	1	20.8	18.7	17.4	100.42	879	0	44.224	By MS/MS	By MS/MS	By MS/MS	By MS/MS	By MS/MS	By MS/MS	By MS/MS	By MS/MS	76389000	75420000	67667000	23551000	273820000	142090000	162550000	276680000
P23526	P23526	21	21	21	Adenosylhomocysteinase	AHCY	1	53	53	53	47.716	432	0	135.59	By MS/MS	By MS/MS	By MS/MS	By MS/MS	By MS/MS	By MS/MS	By MS/MS	By MS/MS	4164200000	4891900000	4129100000	3573900000	3152300000	2871700000	3852300000	3906100000
P23528	P23528	23	23	18	Cofilin-1	CFL1	1	85.5	85.5	62.7	18.502	166	0	323.31	By MS/MS	By MS/MS	By MS/MS	By MS/MS	By MS/MS	By MS/MS	By MS/MS	By MS/MS	49976000000	64731000000	53397000000	54472000000	50960000000	51062000000	54334000000	49666000000
P23588	P23588	28	28	28	Eukaryotic translation initiation factor 4B	EIF4B	1	50.1	50.1	50.1	69.15	611	0	323.31	By MS/MS	By MS/MS	By MS/MS	By MS/MS	By MS/MS	By MS/MS	By MS/MS	By MS/MS	4229300000	4384600000	3289500000	3023300000	3374500000	3428400000	3760800000	3502300000
P23634;Q16720;Q01814	P23634	8;2;1	5;0;0	5;0;0	Plasma membrane calcium-transporting ATPase 4	ATP2B4	3	10	6.3	6.3	137.92	1241	0	13.709	By MS/MS	By MS/MS	By MS/MS	By MS/MS	By matching	By matching	By MS/MS	By MS/MS	80212000	29927000	54687000	34126000	36638000	11041000	53962000	33222000
P23786	P23786	11	11	11	Carnitine O-palmitoyltransferase 2, mitochondrial	CPT2	1	21.1	21.1	21.1	73.776	658	0	13.598	By MS/MS	By MS/MS	By MS/MS	By MS/MS	By MS/MS	By MS/MS	By MS/MS	By MS/MS	103300000	137950000	107700000	91608000	98222000	102190000	88931000	124940000
P23919	P23919	13	13	13	Thymidylate kinase	DTYMK	1	50.9	50.9	50.9	23.819	212	0	19.022	By MS/MS	By MS/MS	By MS/MS	By MS/MS	By MS/MS	By MS/MS	By MS/MS	By MS/MS	591440000	685170000	426320000	305910000	456560000	449850000	660240000	610570000
P23921	P23921	25	25	25	Ribonucleoside-diphosphate reductase large subunit	RRM1	1	47.5	47.5	47.5	90.069	792	0	156.49	By MS/MS	By MS/MS	By MS/MS	By MS/MS	By MS/MS	By MS/MS	By MS/MS	By MS/MS	1289000000	1449000000	981520000	870420000	547440000	451020000	483350000	542010000
P24386	P24386	4	4	4	Rab proteins geranylgeranyltransferase component A 1	CHM	1	6.1	6.1	6.1	73.475	653	0.0020476	2.8749	By MS/MS	By MS/MS	By MS/MS	By matching	By MS/MS	By MS/MS	By matching	By MS/MS	25689000	24088000	8284200	4090600		10812000	47785000	35188000
P24534	P24534	13	11	11	Elongation factor 1-beta	EEF1B2	1	55.1	51.1	51.1	24.763	225	0	207.45	By MS/MS	By MS/MS	By MS/MS	By MS/MS	By MS/MS	By MS/MS	By MS/MS	By MS/MS	4031600000	4629800000	4237600000	3941600000	4258800000	4138900000	3486700000	4868000000
P24539	P24539	14	14	14	ATP synthase F(0) complex subunit B1, mitochondrial	ATP5F1	1	48.8	48.8	48.8	28.908	256	0	199.81	By MS/MS	By MS/MS	By MS/MS	By MS/MS	By MS/MS	By MS/MS	By MS/MS	By MS/MS	1329800000	1551000000	1336600000	971840000	1076700000	984120000	1675800000	1503800000
P24666	P24666	9	9	9	Low molecular weight phosphotyrosine protein phosphatase	ACP1	1	62.7	62.7	62.7	18.042	158	0	163.51	By MS/MS	By MS/MS	By MS/MS	By MS/MS	By MS/MS	By MS/MS	By MS/MS	By MS/MS	570030000	554840000	592720000	521090000	522810000	531550000	685340000	657160000
P24752	P24752	15	15	15	Acetyl-CoA acetyltransferase, mitochondrial	ACAT1	1	45.2	45.2	45.2	45.199	427	0	182.68	By MS/MS	By MS/MS	By MS/MS	By MS/MS	By MS/MS	By MS/MS	By MS/MS	By MS/MS	1732200000	1930700000	1657800000	1346200000	1461600000	1236700000	1534700000	1432000000
P24821	P24821	5	5	5	Tenascin	TNC	1	3.5	3.5	3.5	240.85	2201	0	16.061		By matching			By MS/MS	By MS/MS	By MS/MS	By MS/MS		15369000			66072000	53166000	54924000	40701000
P24928	P24928	20	20	20	DNA-directed RNA polymerase II subunit RPB1	POLR2A	1	16.5	16.5	16.5	217.17	1970	0	66.832	By MS/MS	By MS/MS	By MS/MS	By MS/MS	By MS/MS	By MS/MS	By MS/MS	By MS/MS	359670000	372400000	318460000	203750000	1095600000	121320000	223380000	236030000
P24941;Q00526	P24941	11;4	9;2	9;2	Cyclin-dependent kinase 2	CDK2	2	43.3	36.9	36.9	33.929	298	0	22.288	By MS/MS	By MS/MS	By MS/MS	By MS/MS	By MS/MS	By MS/MS	By MS/MS	By MS/MS	288810000	314040000	259780000	210240000	144370000	166700000	192350000	188530000
P25205	P25205	41	41	41	DNA replication licensing factor MCM3	MCM3	1	63	63	63	90.98	808	0	319.41	By MS/MS	By MS/MS	By MS/MS	By MS/MS	By MS/MS	By MS/MS	By MS/MS	By MS/MS	2315900000	2704800000	2141700000	1549000000	1724300000	1629000000	1989600000	1825300000
P25208	P25208	2	2	2	Nuclear transcription factor Y subunit beta	NFYB	1	16.4	16.4	16.4	22.831	207	0.0005339	3.6064	By matching	By MS/MS	By matching	By matching	By matching	By MS/MS	By matching		57822000	26179000	14247000	44666000	16479000	42287000	22625000
P25325	P25325	5	5	5	3-mercaptopyruvate sulfurtransferase	MPST	1	27.9	27.9	27.9	33.178	297	0	10.949	By MS/MS	By MS/MS	By MS/MS	By MS/MS	By MS/MS	By MS/MS	By MS/MS	By MS/MS	45469000	102820000	65117000	54380000	16088000	31394000	38995000	51333000
P25398	P25398	12	12	12	40S ribosomal protein S12	RPS12	1	78	78	78	14.515	132	0	273.53	By MS/MS	By MS/MS	By MS/MS	By MS/MS	By MS/MS	By MS/MS	By MS/MS	By MS/MS	11589000000	12722000000	9983900000	8725800000	10497000000	11501000000	12347000000	12448000000
P25490;O15391	P25490	7;2	7;2	7;2	Transcriptional repressor protein YY1	YY1	2	18.6	18.6	18.6	44.712	414	0	12.246	By MS/MS	By MS/MS	By MS/MS	By MS/MS	By MS/MS	By MS/MS	By MS/MS	By MS/MS	220770000	180880000	192700000	226330000	88980000	225980000	138080000	139800000
P25685	P25685	20	20	19	DnaJ homolog subfamily B member 1	DNAJB1	1	54.7	54.7	54.7	38.044	340	0	163.31	By MS/MS	By MS/MS	By MS/MS	By MS/MS	By MS/MS	By MS/MS	By MS/MS	By MS/MS	2409100000	2612600000	2741600000	2256400000	2052500000	2299800000	2293500000	2137700000
P25705	P25705	35	35	35	ATP synthase subunit alpha, mitochondrial	ATP5A1	1	69.1	69.1	69.1	59.75	553	0	323.31	By MS/MS	By MS/MS	By MS/MS	By MS/MS	By MS/MS	By MS/MS	By MS/MS	By MS/MS	10938000000	11392000000	9384500000	8397700000	9739200000	10359000000	12576000000	11717000000
P25774	P25774	6	6	6	Cathepsin S	CTSS	1	23.9	23.9	23.9	37.495	331	0	70.453					By MS/MS	By MS/MS	By MS/MS	By MS/MS					128310000	211960000	199760000	226030000
P25786	P25786	26	26	26	Proteasome subunit alpha type-1	PSMA1	1	92.4	92.4	92.4	29.555	263	0	267.1	By MS/MS	By MS/MS	By MS/MS	By MS/MS	By MS/MS	By MS/MS	By MS/MS	By MS/MS	5534500000	5509900000	4990500000	4012400000	5399400000	5400900000	5580600000	5844800000
P25787	P25787	13	13	13	Proteasome subunit alpha type-2	PSMA2	1	64.1	64.1	64.1	25.898	234	0	203.28	By MS/MS	By MS/MS	By MS/MS	By MS/MS	By MS/MS	By MS/MS	By MS/MS	By MS/MS	2417700000	3773100000	2948000000	2572900000	4521400000	3989900000	4865100000	4202500000
P25788	P25788	14	14	14	Proteasome subunit alpha type-3	PSMA3	1	47.5	47.5	47.5	28.433	255	0	117.52	By MS/MS	By MS/MS	By MS/MS	By MS/MS	By MS/MS	By MS/MS	By MS/MS	By MS/MS	2411600000	2665600000	2389300000	1836100000	1941600000	2326500000	2853100000	3095500000
P25789	P25789	16	16	16	Proteasome subunit alpha type-4	PSMA4	1	75.5	75.5	75.5	29.483	261	0	299.49	By MS/MS	By MS/MS	By MS/MS	By MS/MS	By MS/MS	By MS/MS	By MS/MS	By MS/MS	3572400000	3791700000	2963400000	2782800000	3510900000	3762400000	4404100000	3970800000
P26006	P26006	12	12	12	Integrin alpha-3;Integrin alpha-3 heavy chain;Integrin alpha-3 light chain	ITGA3	1	14.6	14.6	14.6	116.61	1051	0	41.927	By MS/MS	By MS/MS	By MS/MS	By MS/MS	By MS/MS	By MS/MS	By MS/MS	By MS/MS	528490000	640890000	473720000	373600000	323590000	210300000	327340000	184300000
P26038	P26038	57	57	45	Moesin	MSN	1	79.5	79.5	61.5	67.819	577	0	323.31	By MS/MS	By MS/MS	By MS/MS	By MS/MS	By MS/MS	By MS/MS	By MS/MS	By MS/MS	14269000000	15481000000	12353000000	10154000000	10575000000	10763000000	13400000000	11016000000
P26196	P26196	21	21	21	Probable ATP-dependent RNA helicase DDX6	DDX6	1	54.9	54.9	54.9	54.416	483	0	205.08	By MS/MS	By MS/MS	By MS/MS	By MS/MS	By MS/MS	By MS/MS	By MS/MS	By MS/MS	1623700000	1864700000	1510200000	1278100000	1595800000	1556700000	1877200000	1586600000
P26232	P26232	6	1	1	Catenin alpha-2	CTNNA2	1	8.7	1.9	1.9	105.31	953	0.00029112	5.3563	By MS/MS	By MS/MS	By MS/MS	By MS/MS	By MS/MS	By MS/MS	By MS/MS	By MS/MS	68242000	90205000	66239000	49969000	47423000	24094000	71612000	57245000
P26358	P26358	42	42	42	DNA (cytosine-5)-methyltransferase 1	DNMT1	1	33.2	33.2	33.2	183.16	1616	0	206.62	By MS/MS	By MS/MS	By MS/MS	By MS/MS	By MS/MS	By MS/MS	By MS/MS	By MS/MS	1285800000	1724400000	1467800000	1158900000	1149400000	1079000000	1267000000	1219900000
P26368	P26368	19	19	19	Splicing factor U2AF 65 kDa subunit	U2AF2	1	51.8	51.8	51.8	53.5	475	0	203.31	By MS/MS	By MS/MS	By MS/MS	By MS/MS	By MS/MS	By MS/MS	By MS/MS	By MS/MS	3321700000	3576800000	2740800000	2347100000	2297000000	3194200000	3443100000	3321100000
P26373	P26373	18	18	18	60S ribosomal protein L13	RPL13	1	59.7	59.7	59.7	24.261	211	0	157.52	By MS/MS	By MS/MS	By MS/MS	By MS/MS	By MS/MS	By MS/MS	By MS/MS	By MS/MS	14716000000	15352000000	12292000000	11637000000	12872000000	13486000000	14348000000	13775000000
P26374	P26374	4	4	4	Rab proteins geranylgeranyltransferase component A 2	CHML	1	7.8	7.8	7.8	74.071	656	0	12.615	By MS/MS	By MS/MS	By MS/MS	By MS/MS	By MS/MS	By MS/MS	By MS/MS	By MS/MS	94133000	83165000	62031000	54313000	34088000	52211000	58225000	62351000
P26440	P26440	8	8	8	Isovaleryl-CoA dehydrogenase, mitochondrial	IVD	1	26	26	26	46.319	423	0	11.956	By MS/MS	By MS/MS	By MS/MS	By MS/MS	By MS/MS	By MS/MS	By MS/MS	By MS/MS	144990000	125880000	224010000	200380000	166040000	165410000	206060000	181050000
P26447	P26447	8	8	8	Protein S100-A4	S100A4	1	55.4	55.4	55.4	11.728	101	0	22.622	By MS/MS	By MS/MS	By MS/MS	By MS/MS	By MS/MS	By MS/MS	By MS/MS	By MS/MS	2787400000	2865400000	2607400000	2279400000	1539400000	1533500000	1944800000	1658000000
P26583	P26583	14	12	12	High mobility group protein B2	HMGB2	1	63.2	53.1	53.1	24.033	209	0	101.38	By MS/MS	By MS/MS	By MS/MS	By MS/MS	By MS/MS	By MS/MS	By MS/MS	By MS/MS	2871100000	3038800000	2382500000	2209200000	1841200000	2452700000	2567500000	2226900000
P26599;Q9UKA9	P26599	27;1	27;1	23;0	Polypyrimidine tract-binding protein 1	PTBP1	2	67.4	67.4	63.3	57.221	531	0	323.31	By MS/MS	By MS/MS	By MS/MS	By MS/MS	By MS/MS	By MS/MS	By MS/MS	By MS/MS	14662000000	15800000000	12085000000	11368000000	17616000000	13998000000	17522000000	15296000000
P26639;A2RTX5	P26639	49;5	49;5	49;5	Threonine--tRNA ligase, cytoplasmic	TARS	2	71.5	71.5	71.5	83.434	723	0	281.12	By MS/MS	By MS/MS	By MS/MS	By MS/MS	By MS/MS	By MS/MS	By MS/MS	By MS/MS	6277700000	7573600000	5949300000	4753100000	4974200000	4699700000	5633400000	6174600000
P26640	P26640	44	44	44	Valine--tRNA ligase	VARS	1	46.9	46.9	46.9	140.47	1264	0	295.62	By MS/MS	By MS/MS	By MS/MS	By MS/MS	By MS/MS	By MS/MS	By MS/MS	By MS/MS	3397000000	3359400000	2303900000	2465200000	2365900000	2262500000	2660700000	2835100000
P26641	P26641	29	29	29	Elongation factor 1-gamma	EEF1G	1	77.6	77.6	77.6	50.118	437	0	323.31	By MS/MS	By MS/MS	By MS/MS	By MS/MS	By MS/MS	By MS/MS	By MS/MS	By MS/MS	15406000000	18931000000	14365000000	12316000000	13547000000	14207000000	15835000000	14664000000
P26885	P26885	9	9	9	Peptidyl-prolyl cis-trans isomerase FKBP2	FKBP2	1	64.8	64.8	64.8	15.649	142	0	27.08	By MS/MS	By MS/MS	By MS/MS	By MS/MS	By MS/MS	By MS/MS	By MS/MS	By MS/MS	523340000	501090000	352800000	293710000	339930000	342830000	360110000	420660000
P27105	P27105	10	10	10	Erythrocyte band 7 integral membrane protein	STOM	1	48.3	48.3	48.3	31.73	288	0	227.67	By MS/MS	By MS/MS	By MS/MS	By MS/MS	By MS/MS	By MS/MS	By MS/MS	By MS/MS	1143700000	1145100000	756570000	953440000	1076200000	1366800000	1897600000	1933100000
P27144	P27144	7	7	7	Adenylate kinase 4, mitochondrial	AK4	1	48	48	48	25.268	223	0	39.984	By MS/MS	By MS/MS	By MS/MS	By MS/MS	By MS/MS	By MS/MS	By MS/MS	By MS/MS	197000000	244660000	286190000	232110000	195410000	286920000	263300000	316030000
P27348	P27348	22	16	16	14-3-3 protein theta	YWHAQ	1	62.9	53.1	53.1	27.764	245	0	323.31	By MS/MS	By MS/MS	By MS/MS	By MS/MS	By MS/MS	By MS/MS	By MS/MS	By MS/MS	7527700000	7747600000	6533300000	5839600000	5970500000	6231100000	6639000000	6372100000
P27361;P31152;Q16659	P27361	7;1;1	3;0;0	3;0;0	Mitogen-activated protein kinase 3	MAPK3	3	23.7	11.6	11.6	43.135	379	0	14.819	By matching	By matching	By MS/MS	By matching	By MS/MS	By MS/MS	By MS/MS	By MS/MS			62000000	25332000	68385000	103830000	89958000	41998000
P27635;Q96L21	P27635	15;4	15;4	15;4	60S ribosomal protein L10	RPL10	2	52.3	52.3	52.3	24.604	214	0	200.71	By MS/MS	By MS/MS	By MS/MS	By MS/MS	By MS/MS	By MS/MS	By MS/MS	By MS/MS	10578000000	11997000000	8431800000	8430600000	8767600000	9528100000	11471000000	9518300000
P27694	P27694	24	24	24	Replication protein A 70 kDa DNA-binding subunit;Replication protein A 70 kDa DNA-binding subunit, N-terminally processed	RPA1	1	51.6	51.6	51.6	68.137	616	0	205.13	By MS/MS	By MS/MS	By MS/MS	By MS/MS	By MS/MS	By MS/MS	By MS/MS	By MS/MS	1783600000	1750100000	1496000000	1087200000	1101300000	1075500000	1477900000	1333400000
P27695	P27695	17	17	17	DNA-(apurinic or apyrimidinic site) lyase;DNA-(apurinic or apyrimidinic site) lyase, mitochondrial	APEX1	1	60.7	60.7	60.7	35.554	318	0	227.78	By MS/MS	By MS/MS	By MS/MS	By MS/MS	By MS/MS	By MS/MS	By MS/MS	By MS/MS	1920300000	2610600000	2127600000	1857400000	2201600000	1810700000	1954500000	2427000000
P27707	P27707	5	5	5	Deoxycytidine kinase	DCK	1	18.8	18.8	18.8	30.518	260	0.00028185	4.6581	By matching	By MS/MS	By MS/MS	By MS/MS	By matching	By MS/MS	By MS/MS	By MS/MS	64076000	62631000	55442000	67221000	26807000	96010000	78619000	10519000
P27708;P31327	P27708	68;1	68;1	68;1	CAD protein;Glutamine-dependent carbamoyl-phosphate synthase;Aspartate carbamoyltransferase;Dihydroorotase	CAD	2	46.6	46.6	46.6	242.98	2225	0	323.31	By MS/MS	By MS/MS	By MS/MS	By MS/MS	By MS/MS	By MS/MS	By MS/MS	By MS/MS	5350400000	5887500000	4637800000	4175400000	3034100000	3295400000	5136000000	4349300000
P27797	P27797	26	26	26	Calreticulin	CALR	1	69.1	69.1	69.1	48.141	417	0	323.31	By MS/MS	By MS/MS	By MS/MS	By MS/MS	By MS/MS	By MS/MS	By MS/MS	By MS/MS	17412000000	18479000000	15217000000	13650000000	14455000000	14360000000	16146000000	16438000000
P27816	P27816	50	50	50	Microtubule-associated protein 4	MAP4	1	51.5	51.5	51.5	121	1152	0	310.1	By MS/MS	By MS/MS	By MS/MS	By MS/MS	By MS/MS	By MS/MS	By MS/MS	By MS/MS	3631800000	3724100000	3199800000	2712600000	2751200000	2741200000	3500500000	3459900000
P27824;O14967	P27824	30;1	30;1	30;1	Calnexin	CANX	2	49.8	49.8	49.8	67.567	592	0	217.36	By MS/MS	By MS/MS	By MS/MS	By MS/MS	By MS/MS	By MS/MS	By MS/MS	By MS/MS	4946200000	5954900000	4713500000	3553800000	3806800000	3721800000	5850900000	5840800000
P28062	P28062	14	14	14	Proteasome subunit beta type-8	PSMB8	1	63	63	63	30.354	276	0	152.33	By MS/MS	By MS/MS	By MS/MS	By MS/MS	By MS/MS	By MS/MS	By MS/MS	By MS/MS	943770000	232980000	145770000	1095500000	1621400000	2917500000	2551200000	1793900000
P28065	P28065	10	10	10	Proteasome subunit beta type-9	PSMB9	1	58	58	58	23.264	219	0	35.961	By MS/MS	By MS/MS	By MS/MS	By MS/MS	By MS/MS	By MS/MS	By MS/MS	By MS/MS	52966000	125110000	130290000	93713000	1022100000	858600000	1079500000	1130300000
P28066	P28066	14	14	14	Proteasome subunit alpha type-5	PSMA5	1	69.3	69.3	69.3	26.411	241	0	323.31	By MS/MS	By MS/MS	By MS/MS	By MS/MS	By MS/MS	By MS/MS	By MS/MS	By MS/MS	3399400000	3678800000	3043000000	3184000000	4008100000	4589100000	4283200000	4158000000
P28070	P28070	8	8	8	Proteasome subunit beta type-4	PSMB4	1	48.5	48.5	48.5	29.204	264	0	220.48	By MS/MS	By MS/MS	By MS/MS	By MS/MS	By MS/MS	By MS/MS	By MS/MS	By MS/MS	1583200000	1781800000	1495000000	1302500000	1739600000	1722200000	2010600000	2057000000
P28072	P28072	7	7	7	Proteasome subunit beta type-6	PSMB6	1	46.9	46.9	46.9	25.357	239	0	94.298	By MS/MS	By MS/MS	By MS/MS	By MS/MS	By MS/MS	By MS/MS	By MS/MS	By MS/MS	1965400000	2259100000	1868000000	1588900000	1911700000	1594500000	1636300000	1256100000
P28074	P28074	13	13	13	Proteasome subunit beta type-5	PSMB5	1	59.7	59.7	59.7	28.48	263	0	162.02	By MS/MS	By MS/MS	By MS/MS	By MS/MS	By MS/MS	By MS/MS	By MS/MS	By MS/MS	1720900000	2498100000	1810700000	1722200000	1200800000	706620000	974430000	1160100000
P28288	P28288	3	3	3	ATP-binding cassette sub-family D member 3	ABCD3	1	6.1	6.1	6.1	75.475	659	0.00031516	7.1327	By MS/MS	By MS/MS	By matching	By matching	By MS/MS	By MS/MS	By matching	By MS/MS	94506000	73051000	52215000	46171000	51788000	71638000	50612000	90155000
P28290	P28290	4	4	4	Sperm-specific antigen 2	SSFA2	1	4	4	4	138.38	1259	0.00027442	4.0447	By MS/MS	By MS/MS	By MS/MS	By matching		By matching		By MS/MS	20807000	52982000	34292000	11278000		11268000
P28331	P28331	22	22	22	NADH-ubiquinone oxidoreductase 75 kDa subunit, mitochondrial	NDUFS1	1	44.7	44.7	44.7	79.467	727	0	101.34	By MS/MS	By MS/MS	By MS/MS	By MS/MS	By MS/MS	By MS/MS	By MS/MS	By MS/MS	763280000	848320000	597850000	637020000	510370000	629850000	885510000	632180000
P28340	P28340	14	14	14	DNA polymerase delta catalytic subunit	POLD1	1	17.9	17.9	17.9	123.63	1107	0	75.473	By MS/MS	By MS/MS	By MS/MS	By MS/MS	By MS/MS	By MS/MS	By MS/MS	By MS/MS	478570000	420710000	371880000	355050000	168910000	210250000	152050000	217580000
P28370	P28370	14	3	3	Probable global transcription activator SNF2L1	SMARCA1	1	13.5	4.2	4.2	122.6	1054	0.00032425	7.8844	By MS/MS	By MS/MS	By MS/MS	By MS/MS	By MS/MS	By MS/MS	By MS/MS	By MS/MS	41794000	46176000	48290000	44756000	36286000	47593000	32165000	21335000
P28482	P28482	14	14	10	Mitogen-activated protein kinase 1	MAPK1	1	56.4	56.4	43.6	41.389	360	0	58.217	By MS/MS	By MS/MS	By MS/MS	By MS/MS	By MS/MS	By MS/MS	By MS/MS	By MS/MS	728330000	846440000	630650000	527960000	570820000	612110000	753570000	701740000
P28799	P28799	6	6	6	Granulins;Acrogranin;Paragranulin;Granulin-1;Granulin-2;Granulin-3;Granulin-4;Granulin-5;Granulin-6;Granulin-7	GRN	1	10.6	10.6	10.6	63.544	593	0	35.109	By MS/MS	By MS/MS	By MS/MS	By MS/MS	By MS/MS	By MS/MS	By MS/MS	By MS/MS	311110000	310840000	282600000	270620000	145380000	133250000	175380000	151390000
P28838	P28838	36	36	36	Cytosol aminopeptidase	LAP3	1	73.2	73.2	73.2	56.166	519	0	323.31	By MS/MS	By MS/MS	By MS/MS	By MS/MS	By MS/MS	By MS/MS	By MS/MS	By MS/MS	2027500000	2129900000	1602700000	1206800000	11753000000	12362000000	15458000000	13155000000
P29034	P29034	2	2	2	Protein S100-A2	S100A2	1	27.6	27.6	27.6	11.117	98	0.00031857	7.453	By MS/MS	By MS/MS	By MS/MS	By MS/MS	By MS/MS	By MS/MS	By MS/MS	By MS/MS	364100000	350050000	262730000	201390000	261600000	268510000	300230000	262060000
P29144	P29144	29	29	29	Tripeptidyl-peptidase 2	TPP2	1	35.1	35.1	35.1	138.35	1249	0	165.12	By MS/MS	By MS/MS	By MS/MS	By MS/MS	By MS/MS	By MS/MS	By MS/MS	By MS/MS	999080000	1063100000	647160000	712410000	734110000	691200000	1012300000	902400000
P29218	P29218	11	11	11	Inositol monophosphatase 1	IMPA1	1	49.5	49.5	49.5	30.188	277	0	39.02	By MS/MS	By MS/MS	By MS/MS	By MS/MS	By MS/MS	By MS/MS	By MS/MS	By MS/MS	553220000	603500000	462480000	335370000	300420000	315440000	613980000	438270000
P29317;P54753;P54764;P54760;Q15375;Q9UF33	P29317	30;2;1;1;1;1	30;2;1;1;1;1	28;0;0;0;0;0	Ephrin type-A receptor 2	EPHA2	6	38.7	38.7	36.9	108.27	976	0	323.31	By MS/MS	By MS/MS	By MS/MS	By MS/MS	By MS/MS	By MS/MS	By MS/MS	By MS/MS	1705600000	1947600000	1622900000	1192300000	1423300000	1278800000	1559600000	1767400000
P29353;P98077	P29353	9;1	9;1	9;1	SHC-transforming protein 1	SHC1	2	30.5	30.5	30.5	62.821	583	0	42.569	By MS/MS	By MS/MS	By MS/MS	By MS/MS	By MS/MS	By MS/MS	By MS/MS	By MS/MS	198600000	220100000	184290000	153390000	181130000	150200000	167390000	241230000
P29372	P29372	4	4	4	DNA-3-methyladenine glycosylase	MPG	1	25.5	25.5	25.5	32.868	298	0	17.096	By MS/MS	By MS/MS	By MS/MS	By MS/MS	By MS/MS	By MS/MS	By MS/MS	By MS/MS	113900000	146090000	96404000	102540000	14517000	33668000	65673000	65997000
P29401	P29401	43	43	43	Transketolase	TKT	1	84.4	84.4	84.4	67.877	623	0	323.31	By MS/MS	By MS/MS	By MS/MS	By MS/MS	By MS/MS	By MS/MS	By MS/MS	By MS/MS	43440000000	50825000000	38219000000	34246000000	36124000000	37647000000	47115000000	42279000000
P29558;Q6XE24	P29558	3;1	2;1	2;1	RNA-binding motif, single-stranded-interacting protein 1	RBMS1	2	9.9	7.4	7.4	44.505	406	0.00033036	8.4754	By MS/MS	By MS/MS	By MS/MS	By MS/MS	By MS/MS	By MS/MS	By MS/MS	By MS/MS	68132000	78431000	64138000	55064000	46178000	49054000	74749000	32592000
P29590	P29590	30	30	30	Protein PML	PML	1	35.1	35.1	35.1	97.55	882	0	189.93	By MS/MS	By MS/MS	By MS/MS	By MS/MS	By MS/MS	By MS/MS	By MS/MS	By MS/MS	665820000	587570000	557760000	530040000	1938700000	1864100000	2445000000	2103300000
P29692	P29692	15	15	13	Elongation factor 1-delta	EEF1D	1	60.5	60.5	57.3	31.121	281	0	237.85	By MS/MS	By MS/MS	By MS/MS	By MS/MS	By MS/MS	By MS/MS	By MS/MS	By MS/MS	7441900000	7537800000	5518000000	5260300000	5912800000	6376300000	7700100000	6692300000
P29728	P29728	3	3	3	2-5-oligoadenylate synthase 2	OAS2	1	5.1	5.1	5.1	82.43	719	0.00053022	3.5098	By MS/MS	By matching		By matching	By matching	By MS/MS	By matching	By MS/MS	17337000	19885000		11533000	10798000	18767000	12500000	58897000
P29966	P29966	6	6	6	Myristoylated alanine-rich C-kinase substrate	MARCKS	1	29.8	29.8	29.8	31.554	332	0	53.151	By MS/MS	By MS/MS	By MS/MS	By MS/MS	By MS/MS	By MS/MS	By MS/MS	By MS/MS	511730000	578370000	482380000	402900000	325830000	202520000	259790000	333510000
P29992;P50148;O95837	P29992;P50148	6;3;2	6;3;2	6;3;2	Guanine nucleotide-binding protein subunit alpha-11;Guanine nucleotide-binding protein G(q) subunit alpha	GNA11;GNAQ	3	24.2	24.2	24.2	42.123	359	0	9.1447	By MS/MS	By MS/MS	By MS/MS	By MS/MS	By MS/MS	By MS/MS	By MS/MS	By MS/MS	176450000	198510000	164150000	89373000	180580000	116820000	134180000	134560000
P30040	P30040	13	13	13	Endoplasmic reticulum resident protein 29	ERP29	1	51.7	51.7	51.7	28.993	261	0	105.19	By MS/MS	By MS/MS	By MS/MS	By MS/MS	By MS/MS	By MS/MS	By MS/MS	By MS/MS	1647000000	1496500000	1389300000	968610000	1726700000	1318700000	1846700000	1890300000
P30041	P30041	27	27	27	Peroxiredoxin-6	PRDX6	1	85.7	85.7	85.7	25.035	224	0	323.31	By MS/MS	By MS/MS	By MS/MS	By MS/MS	By MS/MS	By MS/MS	By MS/MS	By MS/MS	15116000000	17251000000	14471000000	12603000000	14609000000	15308000000	17077000000	16086000000
P30042	P30042	7	7	7	ES1 protein homolog, mitochondrial	C21orf33	1	48.9	48.9	48.9	28.17	268	0	54.4	By MS/MS	By MS/MS	By MS/MS	By MS/MS	By MS/MS	By MS/MS	By MS/MS	By MS/MS	609270000	361510000	307310000	261490000	264200000	302850000	454280000	538420000
P30043	P30043	7	7	7	Flavin reductase (NADPH)	BLVRB	1	59.2	59.2	59.2	22.119	206	0	15.883	By MS/MS	By MS/MS	By MS/MS	By MS/MS	By MS/MS	By MS/MS	By MS/MS	By MS/MS	185160000	199380000	234120000	108790000	228500000	132450000	236050000	218350000
P30044	P30044	13	13	13	Peroxiredoxin-5, mitochondrial	PRDX5	1	56.5	56.5	56.5	22.086	214	0	133.79	By MS/MS	By MS/MS	By MS/MS	By MS/MS	By MS/MS	By MS/MS	By MS/MS	By MS/MS	3109800000	3450800000	2670700000	2627900000	2631200000	3049300000	4243900000	3136500000
P30046;A6NHG4	P30046;A6NHG4	10;8	10;8	10;8	D-dopachrome decarboxylase;D-dopachrome decarboxylase-like protein	DDT;DDTL	2	63.6	63.6	63.6	12.712	118	0	67.828	By MS/MS	By MS/MS	By MS/MS	By MS/MS	By MS/MS	By MS/MS	By MS/MS	By MS/MS	1301200000	1565100000	1334200000	1100900000	873730000	990420000	821290000	795870000
P30048	P30048	9	9	9	Thioredoxin-dependent peroxide reductase, mitochondrial	PRDX3	1	54.7	54.7	54.7	27.692	256	0	91.985	By MS/MS	By MS/MS	By MS/MS	By MS/MS	By MS/MS	By MS/MS	By MS/MS	By MS/MS	1982600000	2436600000	1777600000	1700300000	1123300000	1764300000	2471700000	2020200000
P30049	P30049	2	2	2	ATP synthase subunit delta, mitochondrial	ATP5D	1	13.7	13.7	13.7	17.49	168	0.00028539	4.8899	By MS/MS	By MS/MS	By MS/MS	By MS/MS	By MS/MS	By MS/MS	By MS/MS	By MS/MS	280480000	275260000	252750000	248740000	229050000	210560000	282390000	224210000
P30050	P30050	14	14	14	60S ribosomal protein L12	RPL12	1	73.3	73.3	73.3	17.818	165	0	275.18	By MS/MS	By MS/MS	By MS/MS	By MS/MS	By MS/MS	By MS/MS	By MS/MS	By MS/MS	11232000000	11710000000	10014000000	9536800000	9997000000	11042000000	11935000000	11540000000
P30084	P30084	16	16	16	Enoyl-CoA hydratase, mitochondrial	ECHS1	1	59	59	59	31.387	290	0	215.96	By MS/MS	By MS/MS	By MS/MS	By MS/MS	By MS/MS	By MS/MS	By MS/MS	By MS/MS	2593100000	2545000000	2247000000	2419000000	2075600000	2506100000	3137900000	2516100000
P30085	P30085	11	11	11	UMP-CMP kinase	CMPK1	1	62.8	62.8	62.8	22.222	196	0	99.258	By MS/MS	By MS/MS	By MS/MS	By MS/MS	By MS/MS	By MS/MS	By MS/MS	By MS/MS	1252200000	1208400000	840030000	861950000	744400000	1073900000	1060500000	993370000
P30086	P30086	13	13	13	Phosphatidylethanolamine-binding protein 1;Hippocampal cholinergic neurostimulating peptide	PEBP1	1	80.7	80.7	80.7	21.057	187	0	323.31	By MS/MS	By MS/MS	By MS/MS	By MS/MS	By MS/MS	By MS/MS	By MS/MS	By MS/MS	2699200000	3483200000	2689900000	1554400000	1852400000	1199100000	2342800000	2432100000
P30101	P30101	43	43	43	Protein disulfide-isomerase A3	PDIA3	1	69.5	69.5	69.5	56.782	505	0	323.31	By MS/MS	By MS/MS	By MS/MS	By MS/MS	By MS/MS	By MS/MS	By MS/MS	By MS/MS	15053000000	16632000000	11887000000	11599000000	14760000000	14789000000	17786000000	17030000000
P30153	P30153	31	31	24	Serine/threonine-protein phosphatase 2A 65 kDa regulatory subunit A alpha isoform	PPP2R1A	1	58.7	58.7	45.8	65.308	589	0	323.31	By MS/MS	By MS/MS	By MS/MS	By MS/MS	By MS/MS	By MS/MS	By MS/MS	By MS/MS	7429300000	7218300000	6491800000	5804100000	5233300000	5545100000	7659800000	6584600000
P30154	P30154	12	5	5	Serine/threonine-protein phosphatase 2A 65 kDa regulatory subunit A beta isoform	PPP2R1B	1	25.6	11.8	11.8	66.213	601	0	15.555	By MS/MS	By MS/MS	By MS/MS	By MS/MS	By matching	By matching	By matching	By MS/MS	74945000	70420000	56998000	72772000	44688000	33346000	18995000	56049000
P30260	P30260	4	4	4	Cell division cycle protein 27 homolog	CDC27	1	6.9	6.9	6.9	91.866	824	0.00033014	8.4522	By MS/MS	By MS/MS	By MS/MS	By MS/MS	By MS/MS	By MS/MS	By MS/MS	By MS/MS	30399000	61204000	48248000	31000000	26583000	22254000	41860000	25133000
P30405	P30405	8	7	6	Peptidyl-prolyl cis-trans isomerase F, mitochondrial	PPIF	1	50.2	46.9	43.5	22.04	207	0	26.013	By MS/MS	By MS/MS	By MS/MS	By MS/MS	By MS/MS	By MS/MS	By MS/MS	By MS/MS	737760000	709490000	755410000	494190000	809200000	593590000	839200000	740970000
P30419;O60551	P30419	15;3	15;3	15;3	Glycylpeptide N-tetradecanoyltransferase 1	NMT1	2	41.9	41.9	41.9	56.806	496	0	144.82	By MS/MS	By MS/MS	By MS/MS	By MS/MS	By MS/MS	By MS/MS	By MS/MS	By MS/MS	909340000	879990000	1085200000	726860000	814670000	834990000	1161500000	918280000
P30455;P30443	P30455;P30443	16;16	2;2	2;2	HLA class I histocompatibility antigen, A-36 alpha chain;HLA class I histocompatibility antigen, A-1 alpha chain	HLA-A	2	55.6	5.2	5.2	40.933	365	0.00052924	3.4566	By matching	By matching	By matching	By MS/MS	By MS/MS	By MS/MS	By MS/MS	By MS/MS			28787000	28194000		96597000	134280000	16608000
P30464;P30484;P30685;P30491;P30495;P30490;P18464;Q95365;Q29718;P30498;Q29836;P30475	P30464;P30484;P30685;P30491;P30495;P30490;P18464;Q95365;Q29718;P30498;Q29836;P30475	16;14;13;13;12;12;11;10;10;10;9;9	4;4;3;3;3;2;2;2;2;2;2;2	0;0;0;0;0;0;0;0;0;0;0;0	HLA class I histocompatibility antigen, B-15 alpha chain;HLA class I histocompatibility antigen, B-46 alpha chain;HLA class I histocompatibility antigen, B-35 alpha chain;HLA class I histocompatibility antigen, B-53 alpha chain;HLA class I histocompatibility antigen, B-56 alpha chain;HLA class I histocompatibility antigen, B-52 alpha chain;HLA class I histocompatibility antigen, B-51 alpha chain;…	HLA-B	12	55.2	21	0	40.388	362	0	64.72	By matching	By matching	By matching	By MS/MS	By MS/MS	By MS/MS	By MS/MS	By MS/MS	25977000	39287000	27799000	20694000	502210000	500040000	840760000	545150000
P30479	P30479	14	1	0	HLA class I histocompatibility antigen, B-41 alpha chain	HLA-B	1	49.7	3.9	0	40.539	362	0	28.539	By matching	By matching	By MS/MS	By MS/MS	By MS/MS	By MS/MS	By MS/MS	By MS/MS			18579000	7967500	46864000	52475000	52723000	38322000
P30481	P30481	18	14	3	HLA class I histocompatibility antigen, B-44 alpha chain	HLA-B	1	61.3	53.6	15.2	40.481	362	0	171.38	By matching	By MS/MS	By MS/MS	By MS/MS	By MS/MS	By MS/MS	By MS/MS	By MS/MS	31169000	453310000	69659000	34970000	2690800000	1806800000	3450700000	2877500000
P30508;P30510;Q29960;Q07000;P30504;P30501	P30508;P30510;Q29960;Q07000;P30504;P30501	13;11;11;10;8;7	5;5;4;3;2;2	0;0;0;0;0;0	HLA class I histocompatibility antigen, Cw-12 alpha chain;HLA class I histocompatibility antigen, Cw-14 alpha chain;HLA class I histocompatibility antigen, Cw-16 alpha chain;HLA class I histocompatibility antigen, Cw-15 alpha chain;HLA class I histocompatibility antigen, Cw-4 alpha chain;HLA class I histocompatibility antigen, Cw-2 alpha chain	HLA-C	6	48.1	21.6	0	40.885	366	0	23.467	By matching	By matching	By MS/MS	By MS/MS	By MS/MS	By MS/MS	By MS/MS	By MS/MS			37808000	24447000	150160000	123840000	195100000	178600000
P30519	P30519	10	10	10	Heme oxygenase 2	HMOX2	1	42.7	42.7	42.7	36.032	316	0	60.355	By MS/MS	By MS/MS	By MS/MS	By MS/MS	By MS/MS	By MS/MS	By MS/MS	By MS/MS	407280000	605980000	256590000	307770000	360440000	373120000	554830000	357850000
P30520;Q8N142	P30520	17;1	17;1	16;1	Adenylosuccinate synthetase isozyme 2	ADSS	2	40.6	40.6	36	50.097	456	0	99.368	By MS/MS	By MS/MS	By MS/MS	By MS/MS	By MS/MS	By MS/MS	By MS/MS	By MS/MS	1395100000	1659400000	1347500000	1028600000	1141000000	1149700000	1345300000	1371800000
P30530	P30530	3	3	3	Tyrosine-protein kinase receptor UFO	AXL	1	5	5	5	98.335	894	0	9.5147	By MS/MS	By MS/MS	By MS/MS	By MS/MS	By matching	By matching		By MS/MS	35808000	47164000	42585000	45208000	22001000	29236000		17729000
P30533	P30533	5	5	5	Alpha-2-macroglobulin receptor-associated protein	LRPAP1	1	19.9	19.9	19.9	41.465	357	0	17.854	By MS/MS	By MS/MS	By MS/MS	By MS/MS	By MS/MS	By MS/MS	By MS/MS	By MS/MS	163950000	306420000	184670000	248980000	126200000	134420000	198210000	127190000
P30536	P30536	2	2	2	Translocator protein	TSPO	1	9.5	9.5	9.5	18.828	169	0.0094251	1.8697	By MS/MS	By MS/MS	By MS/MS	By MS/MS	By MS/MS	By MS/MS	By MS/MS	By MS/MS	242720000	187840000	260050000	140030000	183700000	118900000	181440000	183360000
P30566	P30566	15	15	15	Adenylosuccinate lyase	ADSL	1	42.6	42.6	42.6	54.889	484	0	70.414	By MS/MS	By MS/MS	By MS/MS	By MS/MS	By MS/MS	By MS/MS	By MS/MS	By MS/MS	1115900000	1526900000	1124500000	915170000	977050000	1029200000	1283800000	1073600000
P30622	P30622	13	13	13	CAP-Gly domain-containing linker protein 1	CLIP1	1	11.4	11.4	11.4	162.24	1438	0	31.814	By MS/MS	By MS/MS	By MS/MS	By MS/MS	By MS/MS	By MS/MS	By MS/MS	By MS/MS	82476000	125880000	86864000	105040000	200480000	274280000	243100000	260650000
P30626	P30626	9	9	9	Sorcin	SRI	1	57.6	57.6	57.6	21.676	198	0	50.872	By MS/MS	By MS/MS	By MS/MS	By MS/MS	By MS/MS	By MS/MS	By MS/MS	By MS/MS	966670000	1054900000	808490000	663820000	641250000	642020000	658250000	792780000
P30740	P30740	9	9	8	Leukocyte elastase inhibitor	SERPINB1	1	29	29	26.4	42.741	379	0	21.508	By MS/MS	By MS/MS	By MS/MS	By MS/MS	By MS/MS	By MS/MS	By MS/MS	By MS/MS	205190000	225530000	191160000	170670000	217820000	233880000	158080000	196210000
P30825	P30825	3	3	3	High affinity cationic amino acid transporter 1	SLC7A1	1	6.4	6.4	6.4	67.638	629	0	22.706	By MS/MS	By MS/MS	By MS/MS	By MS/MS	By MS/MS	By MS/MS	By MS/MS	By MS/MS	162730000	183900000	140960000	97615000	126520000	112920000	141390000	141360000
P30837	P30837	8	6	6	Aldehyde dehydrogenase X, mitochondrial	ALDH1B1	1	21.1	18	18	57.206	517	0	14.463	By MS/MS	By MS/MS	By MS/MS	By MS/MS	By MS/MS	By MS/MS	By MS/MS	By MS/MS	175350000	181960000	184180000	170310000	168460000	129050000	144460000	158220000
P30876	P30876	31	31	31	DNA-directed RNA polymerase II subunit RPB2	POLR2B	1	36.5	36.5	36.5	133.9	1174	0	119.73	By MS/MS	By MS/MS	By MS/MS	By MS/MS	By MS/MS	By MS/MS	By MS/MS	By MS/MS	900700000	857990000	743260000	703590000	533330000	596140000	597960000	854640000
P31040	P31040	17	17	17	Succinate dehydrogenase [ubiquinone] flavoprotein subunit, mitochondrial	SDHA	1	36.6	36.6	36.6	72.691	664	0	188.87	By MS/MS	By MS/MS	By MS/MS	By MS/MS	By MS/MS	By MS/MS	By MS/MS	By MS/MS	1297500000	1471000000	981030000	987790000	1070000000	1188100000	1311500000	1128600000
P31146	P31146	4	3	3	Coronin-1A	CORO1A	1	8.7	7.2	7.2	51.026	461	0.00031786	7.3808	By MS/MS	By MS/MS	By MS/MS	By MS/MS	By MS/MS	By matching	By matching	By MS/MS	12431000	15250000	13168000	17622000	16495000
P31150	P31150	27	16	16	Rab GDP dissociation inhibitor alpha	GDI1	1	64.2	45.9	45.9	50.582	447	0	245.83	By MS/MS	By MS/MS	By MS/MS	By MS/MS	By MS/MS	By MS/MS	By MS/MS	By MS/MS	991270000	1274000000	978800000	847710000	901360000	1023900000	881630000	811880000
P31153;Q00266	P31153	22;4	22;4	22;4	S-adenosylmethionine synthase isoform type-2	MAT2A	2	58.5	58.5	58.5	43.66	395	0	147.64	By MS/MS	By MS/MS	By MS/MS	By MS/MS	By MS/MS	By MS/MS	By MS/MS	By MS/MS	3493600000	4433400000	3492300000	2732600000	3286400000	3630800000	4016700000	3665000000
P31350	P31350	12	12	10	Ribonucleoside-diphosphate reductase subunit M2	RRM2	1	36.2	36.2	30.1	44.877	389	0	36.332	By MS/MS	By MS/MS	By MS/MS	By MS/MS	By MS/MS	By MS/MS	By MS/MS	By MS/MS	621160000	608630000	608360000	435060000	256260000	171330000	270090000	262060000
P31483	P31483	7	4	4	Nucleolysin TIA-1 isoform p40	TIA1	1	24.1	18.7	18.7	42.963	386	0	30.083	By MS/MS	By MS/MS	By matching	By MS/MS	By MS/MS	By MS/MS	By MS/MS	By MS/MS	102150000	44851000	51820000	43173000	80517000	78690000	58632000	49187000
P31689	P31689	24	24	24	DnaJ homolog subfamily A member 1	DNAJA1	1	65.5	65.5	65.5	44.868	397	0	252.62	By MS/MS	By MS/MS	By MS/MS	By MS/MS	By MS/MS	By MS/MS	By MS/MS	By MS/MS	3690500000	4593200000	3618200000	2948300000	2820200000	3147800000	2922700000	3539800000
P31751	P31751	7	5	5	RAC-beta serine/threonine-protein kinase	AKT2	1	18.5	12.1	12.1	55.768	481	0.00027917	4.4131	By MS/MS	By MS/MS	By MS/MS	By MS/MS	By MS/MS	By MS/MS	By matching	By MS/MS	32122000	12658000	10508000	87561000	6560500	78653000	90794000	27918000
P31930	P31930	14	14	14	Cytochrome b-c1 complex subunit 1, mitochondrial	UQCRC1	1	45.6	45.6	45.6	52.645	480	0	101.15	By MS/MS	By MS/MS	By MS/MS	By MS/MS	By MS/MS	By MS/MS	By MS/MS	By MS/MS	1216700000	1409300000	1139600000	911610000	972570000	933910000	1228900000	1000800000
P31937	P31937	4	4	4	3-hydroxyisobutyrate dehydrogenase, mitochondrial	HIBADH	1	17.9	17.9	17.9	35.329	336	0	23.477	By MS/MS	By MS/MS	By MS/MS	By MS/MS	By MS/MS	By MS/MS	By MS/MS	By MS/MS	143420000	139850000	117780000	88161000	51348000	46373000	89791000	91562000
P31939	P31939	39	39	39	Bifunctional purine biosynthesis protein PURH;Phosphoribosylaminoimidazolecarboxamide formyltransferase;IMP cyclohydrolase	ATIC	1	81.1	81.1	81.1	64.615	592	0	323.31	By MS/MS	By MS/MS	By MS/MS	By MS/MS	By MS/MS	By MS/MS	By MS/MS	By MS/MS	5104700000	6069200000	4998500000	4326900000	4047600000	4418200000	4804100000	4642000000
P31942	P31942	12	11	11	Heterogeneous nuclear ribonucleoprotein H3	HNRNPH3	1	53.2	50.9	50.9	36.926	346	0	86.231	By MS/MS	By MS/MS	By MS/MS	By MS/MS	By MS/MS	By MS/MS	By MS/MS	By MS/MS	1488500000	1780500000	1572600000	1635900000	1370500000	1445600000	1184800000	1260200000
P31943	P31943	20	20	10	Heterogeneous nuclear ribonucleoprotein H;Heterogeneous nuclear ribonucleoprotein H, N-terminally processed	HNRNPH1	1	51.4	51.4	28.1	49.229	449	0	323.31	By MS/MS	By MS/MS	By MS/MS	By MS/MS	By MS/MS	By MS/MS	By MS/MS	By MS/MS	11166000000	12339000000	10489000000	9601200000	10333000000	10622000000	11393000000	10006000000
P31946	P31946	22	15	14	14-3-3 protein beta/alpha;14-3-3 protein beta/alpha, N-terminally processed	YWHAB	1	72.4	58.9	56.1	28.082	246	0	323.31	By MS/MS	By MS/MS	By MS/MS	By MS/MS	By MS/MS	By MS/MS	By MS/MS	By MS/MS	6420100000	6626300000	5443200000	4877100000	5008800000	4623800000	5128700000	5551300000
P31947	P31947	12	8	8	14-3-3 protein sigma	SFN	1	58.1	45.2	45.2	27.774	248	0	39.26	By MS/MS	By MS/MS	By MS/MS	By MS/MS	By MS/MS	By MS/MS	By MS/MS	By MS/MS	3409200000	3322000000	2773400000	2570600000	2710500000	2004900000	2836300000	2508600000
P31948	P31948	62	62	62	Stress-induced-phosphoprotein 1	STIP1	1	71.8	71.8	71.8	62.639	543	0	323.31	By MS/MS	By MS/MS	By MS/MS	By MS/MS	By MS/MS	By MS/MS	By MS/MS	By MS/MS	16937000000	17074000000	14495000000	13198000000	14538000000	14596000000	16465000000	14723000000
P31949	P31949	8	8	8	Protein S100-A11;Protein S100-A11, N-terminally processed	S100A11	1	86.7	86.7	86.7	11.74	105	0	145.18	By MS/MS	By MS/MS	By MS/MS	By MS/MS	By MS/MS	By MS/MS	By MS/MS	By MS/MS	10937000000	10796000000	5321900000	9086100000	13788000000	12238000000	13215000000	13020000000
P32004	P32004	5	5	5	Neural cell adhesion molecule L1	L1CAM	1	6.3	6.3	6.3	140	1257	0	19.64	By MS/MS	By MS/MS	By MS/MS	By MS/MS	By matching	By matching		By matching	78592000	91318000	88717000	36179000	6593000	20425000		9881000
P32119	P32119	16	15	15	Peroxiredoxin-2	PRDX2	1	72.2	66.7	66.7	21.892	198	0	105.63	By MS/MS	By MS/MS	By MS/MS	By MS/MS	By MS/MS	By MS/MS	By MS/MS	By MS/MS	3650300000	3463700000	2610200000	2489600000	1657400000	2219400000	3187000000	2462800000
P32321	P32321	7	7	7	Deoxycytidylate deaminase	DCTD	1	44.4	44.4	44.4	20.016	178	0	11.72	By MS/MS	By MS/MS	By MS/MS	By MS/MS	By MS/MS	By MS/MS	By MS/MS	By MS/MS	117830000	122070000	127800000	103540000	75012000	113860000	66337000	37385000
P32322	P32322	5	4	4	Pyrroline-5-carboxylate reductase 1, mitochondrial	PYCR1	1	27.9	23.8	23.8	33.36	319	0	14.674	By MS/MS	By MS/MS	By MS/MS	By MS/MS	By MS/MS	By MS/MS	By MS/MS	By MS/MS	92238000	112220000	121100000	77026000	72388000	53235000	81855000	71885000
P32455	P32455	36	36	26	Interferon-induced guanylate-binding protein 1	GBP1	1	54.9	54.9	38	67.93	592	0	323.31	By matching	By matching	By MS/MS	By matching	By MS/MS	By MS/MS	By MS/MS	By MS/MS	32778000	6007800		10325000	6667800000	6852000000	6772600000	6548000000
P32456	P32456	15	11	11	Interferon-induced guanylate-binding protein 2	GBP2	1	26.1	18.8	18.8	67.208	591	0	30.417	By matching		By matching		By MS/MS	By MS/MS	By MS/MS	By MS/MS					326650000	273890000	308680000	304770000
P32929	P32929	3	3	3	Cystathionine gamma-lyase	CTH	1	10.1	10.1	10.1	44.508	405	0.00029771	5.8398	By MS/MS	By MS/MS	By MS/MS	By MS/MS	By MS/MS	By MS/MS	By MS/MS	By MS/MS	11486000	17724000	14798000	20775000	66131000	26975000	74291000	72856000
P32969	P32969	12	12	12	60S ribosomal protein L9	RPL9	1	70.3	70.3	70.3	21.863	192	0	240.59	By MS/MS	By MS/MS	By MS/MS	By MS/MS	By MS/MS	By MS/MS	By MS/MS	By MS/MS	6397800000	8509100000	5360900000	4478100000	5544400000	5584000000	5433000000	6560600000
P32970	P32970	7	7	7	CD70 antigen	CD70	1	40.4	40.4	40.4	21.118	193	0	23.547	By MS/MS	By MS/MS	By MS/MS	By MS/MS	By MS/MS	By MS/MS	By MS/MS	By MS/MS	336740000	315950000	219140000	256980000	289250000	342110000	401310000	345570000
P33176;O60282;Q12840	P33176	46;8;8	46;8;8	46;8;8	Kinesin-1 heavy chain	KIF5B	3	61.6	61.6	61.6	109.68	963	0	323.31	By MS/MS	By MS/MS	By MS/MS	By MS/MS	By MS/MS	By MS/MS	By MS/MS	By MS/MS	2607700000	3278900000	2581100000	2164200000	2409500000	2057200000	2483100000	2177800000
P33240;Q9H0L4	P33240	14;6	14;6	14;6	Cleavage stimulation factor subunit 2	CSTF2	2	38.6	38.6	38.6	60.959	577	0	68.969	By MS/MS	By MS/MS	By MS/MS	By MS/MS	By MS/MS	By MS/MS	By MS/MS	By MS/MS	806530000	669610000	550890000	611520000	618980000	608860000	843880000	750670000
P33316	P33316	10	10	10	Deoxyuridine 5-triphosphate nucleotidohydrolase, mitochondrial	DUT	1	46.8	46.8	46.8	26.563	252	0	123.59	By MS/MS	By MS/MS	By MS/MS	By MS/MS	By MS/MS	By MS/MS	By MS/MS	By MS/MS	2511800000	2703300000	2222600000	1979600000	1747000000	1822400000	1804800000	2003700000
P33527	P33527	2	2	2	Multidrug resistance-associated protein 1	ABCC1	1	2.9	2.9	2.9	171.59	1531	0.0046375	2.2777	By MS/MS	By MS/MS	By matching	By MS/MS	By MS/MS	By matching	By matching	By matching	760150000	626960000	479410000	508350000	611150000	685920000	885980000	731620000
P33552	P33552	2	2	2	Cyclin-dependent kinases regulatory subunit 2	CKS2	1	44.3	44.3	44.3	9.8602	79	0	14.48	By MS/MS	By MS/MS	By matching	By MS/MS	By matching			By matching	195260000	239850000	165350000	114640000	8807800			11098000
P33764	P33764	3	3	3	Protein S100-A3	S100A3	1	34.7	34.7	34.7	11.713	101	0	31.023	By MS/MS	By MS/MS	By MS/MS	By MS/MS	By MS/MS	By MS/MS	By MS/MS	By MS/MS	76753000	110230000	72556000	83873000	39450000	57455000	43029000	46892000
P33897	P33897	2	2	2	ATP-binding cassette sub-family D member 1	ABCD1	1	4.3	4.3	4.3	82.936	745	0.00031496	7.1075		By MS/MS	By matching		By MS/MS		By MS/MS			8659900	10069000		9723500
P33991	P33991	31	31	31	DNA replication licensing factor MCM4	MCM4	1	47	47	47	96.557	863	0	228.39	By MS/MS	By MS/MS	By MS/MS	By MS/MS	By MS/MS	By MS/MS	By MS/MS	By MS/MS	2370900000	2921500000	2318600000	2173500000	1759700000	2158600000	1908100000	2086500000
P33992	P33992	34	34	34	DNA replication licensing factor MCM5	MCM5	1	48.8	48.8	48.8	82.285	734	0	79.268	By MS/MS	By MS/MS	By MS/MS	By MS/MS	By MS/MS	By MS/MS	By MS/MS	By MS/MS	1784100000	2016600000	1434500000	1287000000	1299800000	1484000000	1798800000	1399300000
P33993	P33993	31	31	31	DNA replication licensing factor MCM7	MCM7	1	47.4	47.4	47.4	81.307	719	0	139.01	By MS/MS	By MS/MS	By MS/MS	By MS/MS	By MS/MS	By MS/MS	By MS/MS	By MS/MS	1792100000	2344800000	1785300000	1375800000	1393200000	1391400000	2098700000	1590100000
P34896	P34896	9	8	8	Serine hydroxymethyltransferase, cytosolic	SHMT1	1	25.7	22.8	22.8	53.082	483	0	23.768	By MS/MS	By MS/MS	By MS/MS	By MS/MS	By MS/MS	By MS/MS	By MS/MS	By MS/MS	133840000	283130000	217580000	74156000	137840000	77450000	125720000	116080000
P34897	P34897	27	27	26	Serine hydroxymethyltransferase, mitochondrial	SHMT2	1	62.3	62.3	59.5	55.992	504	0	323.31	By MS/MS	By MS/MS	By MS/MS	By MS/MS	By MS/MS	By MS/MS	By MS/MS	By MS/MS	6200800000	7406700000	5191300000	4690900000	5052100000	4824600000	6087600000	5748100000
P34932	P34932	71	71	67	Heat shock 70 kDa protein 4	HSPA4	1	84.4	84.4	78.8	94.33	840	0	323.31	By MS/MS	By MS/MS	By MS/MS	By MS/MS	By MS/MS	By MS/MS	By MS/MS	By MS/MS	13954000000	14720000000	11312000000	10225000000	10855000000	9481200000	11936000000	11738000000
P34949	P34949	5	5	5	Mannose-6-phosphate isomerase	MPI	1	20.1	20.1	20.1	46.655	423	0	17.011	By MS/MS	By MS/MS	By MS/MS	By MS/MS	By MS/MS	By MS/MS	By MS/MS	By MS/MS	107590000	170910000	73127000	78586000	50710000	50891000	39625000	57243000
P35080	P35080	5	5	5	Profilin-2	PFN2	1	33.6	33.6	33.6	15.046	140	0	25.261	By MS/MS	By MS/MS	By MS/MS	By MS/MS	By MS/MS	By MS/MS	By MS/MS	By MS/MS	629300000	614340000	520040000	524180000	350400000	476630000	450060000	394880000
P35221;REV__Q9P2T0;Q9UI47	P35221	37;1;1	37;1;1	32;0;1	Catenin alpha-1	CTNNA1	3	54.6	54.6	48.5	100.07	906	0	323.31	By MS/MS	By MS/MS	By MS/MS	By MS/MS	By MS/MS	By MS/MS	By MS/MS	By MS/MS	2287400000	2277400000	1753800000	1678800000	1238200000	1563500000	1792900000	1512600000
P35222;P14923	P35222	22;3	22;3	22;3	Catenin beta-1	CTNNB1	2	45.7	45.7	45.7	85.496	781	0	133.33	By MS/MS	By MS/MS	By MS/MS	By MS/MS	By MS/MS	By MS/MS	By MS/MS	By MS/MS	1325800000	1527800000	1170900000	1001600000	966870000	961340000	1614400000	1159300000
P35232	P35232	20	20	20	Prohibitin	PHB	1	85.3	85.3	85.3	29.804	272	0	247.07	By MS/MS	By MS/MS	By MS/MS	By MS/MS	By MS/MS	By MS/MS	By MS/MS	By MS/MS	8166100000	8900900000	7354000000	7004500000	7157800000	7395500000	9329700000	9025200000
P35237	P35237	18	18	17	Serpin B6	SERPINB6	1	60.1	60.1	58	42.621	376	0	155.92	By MS/MS	By MS/MS	By MS/MS	By MS/MS	By MS/MS	By MS/MS	By MS/MS	By MS/MS	1447700000	1604400000	1093200000	791050000	768110000	1015200000	1245000000	1006200000
P35241	P35241	30	17	17	Radixin	RDX	1	49.2	30	30	68.563	583	0	39.329	By MS/MS	By MS/MS	By MS/MS	By MS/MS	By MS/MS	By MS/MS	By MS/MS	By MS/MS	660790000	855050000	616550000	482570000	669780000	572140000	633100000	573650000
P35244	P35244	7	7	7	Replication protein A 14 kDa subunit	RPA3	1	67.8	67.8	67.8	13.569	121	0	37.24	By MS/MS	By MS/MS	By MS/MS	By MS/MS	By MS/MS	By MS/MS	By MS/MS	By MS/MS	584890000	818240000	689440000	640360000	653410000	575560000	658630000	592500000
P35249	P35249	14	14	14	Replication factor C subunit 4	RFC4	1	48.5	48.5	48.5	39.681	363	0	53.71	By MS/MS	By MS/MS	By MS/MS	By MS/MS	By MS/MS	By MS/MS	By MS/MS	By MS/MS	418190000	565780000	291200000	485220000	350080000	255490000	323110000	235290000
P35250	P35250	8	8	8	Replication factor C subunit 2	RFC2	1	28.5	28.5	28.5	39.157	354	0	66.098	By MS/MS	By MS/MS	By MS/MS	By MS/MS	By MS/MS	By MS/MS	By MS/MS	By MS/MS	191570000	228880000	267110000	251230000	214000000	238960000	237040000	205650000
P35251	P35251	11	11	11	Replication factor C subunit 1	RFC1	1	13.2	13.2	13.2	128.25	1148	0	45.689	By MS/MS	By MS/MS	By MS/MS	By MS/MS	By MS/MS	By MS/MS	By MS/MS	By MS/MS	132260000	241910000	122050000	142890000	92864000	88328000	101750000	108260000
P35268	P35268	7	7	7	60S ribosomal protein L22	RPL22	1	53.1	53.1	53.1	14.787	128	0	191.3	By MS/MS	By MS/MS	By MS/MS	By MS/MS	By MS/MS	By MS/MS	By MS/MS	By MS/MS	5138800000	5961100000	5046300000	5138800000	5977200000	6427000000	6723100000	6152900000
P35269	P35269	17	17	17	General transcription factor IIF subunit 1	GTF2F1	1	39.3	39.3	39.3	58.24	517	0	96.294	By MS/MS	By MS/MS	By MS/MS	By MS/MS	By MS/MS	By MS/MS	By MS/MS	By MS/MS	468470000	648930000	399230000	384290000	319340000	326090000	383650000	372020000
P35270	P35270	8	8	8	Sepiapterin reductase	SPR	1	41.4	41.4	41.4	28.048	261	0	59.165	By MS/MS	By MS/MS	By MS/MS	By MS/MS	By MS/MS	By MS/MS	By MS/MS	By MS/MS	486430000	475870000	415670000	349000000	345330000	378360000	524480000	568510000
P35527	P35527	22	21	21	Keratin, type I cytoskeletal 9	KRT9	1	51.8	51.8	51.8	62.064	623	0	323.31	By MS/MS	By MS/MS	By MS/MS	By MS/MS	By MS/MS	By MS/MS	By MS/MS	By MS/MS	189120000	761410000	1973700000	1122500000	597650000	500780000	2785700000	1006400000
P35573	P35573	4	4	4	Glycogen debranching enzyme;4-alpha-glucanotransferase;Amylo-alpha-1,6-glucosidase	AGL	1	4.2	4.2	4.2	174.76	1532	0.00029674	5.7716	By MS/MS	By MS/MS	By MS/MS	By MS/MS	By matching	By MS/MS	By MS/MS	By MS/MS	30586000	12216000	39687000	8722700	7753800	12865000	27813000	28792000
P35579;REV__Q9UKV3;P12883;P13535;Q9UKX3;P13533;P12882;P11055;A7E2Y1	P35579	134;1;1;1;1;1;1;1;1	134;1;1;1;1;1;1;1;1	110;1;0;0;0;0;0;0;0	Myosin-9	MYH9	9	63.8	63.8	54.2	226.53	1960	0	323.31	By MS/MS	By MS/MS	By MS/MS	By MS/MS	By MS/MS	By MS/MS	By MS/MS	By MS/MS	18255000000	19899000000	15625000000	13872000000	14992000000	16050000000	20508000000	17645000000
P35580	P35580	71	51	47	Myosin-10	MYH10	1	44.1	36.5	34.6	229	1976	0	272.23	By MS/MS	By MS/MS	By MS/MS	By MS/MS	By MS/MS	By MS/MS	By MS/MS	By MS/MS	1264900000	1447600000	1392600000	1286100000	1231700000	827040000	856770000	910220000
P35606	P35606	38	38	38	Coatomer subunit beta	COPB2	1	52.9	52.9	52.9	102.49	906	0	260.96	By MS/MS	By MS/MS	By MS/MS	By MS/MS	By MS/MS	By MS/MS	By MS/MS	By MS/MS	3292300000	3744100000	3038900000	2909700000	2927800000	3140500000	3176400000	3545800000
P35610	P35610	8	8	8	Sterol O-acyltransferase 1	SOAT1	1	14.7	14.7	14.7	64.734	550	0	54.396	By MS/MS	By MS/MS	By MS/MS	By MS/MS	By MS/MS	By MS/MS	By MS/MS	By MS/MS	168260000	205120000	170210000	188660000	210610000	187340000	167180000	259150000
P35611	P35611	10	10	10	Alpha-adducin	ADD1	1	18.3	18.3	18.3	80.954	737	0	31.179	By MS/MS	By MS/MS	By MS/MS	By MS/MS	By MS/MS	By MS/MS	By MS/MS	By MS/MS	357440000	347710000	245670000	223330000	125040000	150650000	141730000	158370000
P35613	P35613	9	9	9	Basigin	BSG	1	32.2	32.2	32.2	42.2	385	0	102.47	By MS/MS	By MS/MS	By MS/MS	By MS/MS	By MS/MS	By MS/MS	By MS/MS	By MS/MS	1098500000	1319400000	951290000	756770000	788150000	754020000	1136800000	900080000
P35637	P35637	12	12	10	RNA-binding protein FUS	FUS	1	23	23	23	53.425	526	0	229.51	By MS/MS	By MS/MS	By MS/MS	By MS/MS	By MS/MS	By MS/MS	By MS/MS	By MS/MS	5070300000	5745500000	4641800000	3870200000	4504800000	4427000000	5133300000	5409800000
P35658	P35658	26	26	26	Nuclear pore complex protein Nup214	NUP214	1	22.7	22.7	22.7	213.62	2090	0	145.71	By MS/MS	By MS/MS	By MS/MS	By MS/MS	By MS/MS	By MS/MS	By MS/MS	By MS/MS	402340000	571490000	499170000	392070000	479360000	507270000	602210000	499220000
P35659	P35659	13	13	13	Protein DEK	DEK	1	36	36	36	42.674	375	0	43.693	By MS/MS	By MS/MS	By MS/MS	By MS/MS	By MS/MS	By MS/MS	By MS/MS	By MS/MS	1053000000	1066300000	839060000	694290000	893070000	892140000	1086400000	1002100000
P35754	P35754	4	4	4	Glutaredoxin-1	GLRX	1	50	50	50	11.776	106	0	13.539	By MS/MS	By MS/MS	By MS/MS	By MS/MS	By MS/MS	By MS/MS	By MS/MS	By MS/MS	142710000	206790000	97854000	122720000	163510000	243380000	287520000	202490000
P35813	P35813	4	2	2	Protein phosphatase 1A	PPM1A	1	11.3	5.5	5.5	42.447	382	0.0032411	2.5493	By MS/MS	By matching	By MS/MS	By MS/MS	By MS/MS	By matching	By matching	By matching	49549000		45764000	37411000	44078000
P35869	P35869	3	3	3	Aryl hydrocarbon receptor	AHR	1	6	6	6	96.146	848	0.00030358	6.193	By MS/MS	By MS/MS	By MS/MS	By MS/MS	By matching	By matching	By matching	By matching	24635000	17874000	10051000	13780000	4832000	8894300	7308000	7203900
P35908;Q7Z794	P35908	26;4	21;0	17;0	Keratin, type II cytoskeletal 2 epidermal	KRT2	2	49.6	45.1	39	65.432	639	0	118.95	By MS/MS	By MS/MS	By MS/MS	By MS/MS	By MS/MS	By MS/MS	By MS/MS	By MS/MS	303960000	495370000	731280000	596770000	214520000	243920000	1333100000	672720000
P35998	P35998	39	39	39	26S protease regulatory subunit 7	PSMC2	1	80.4	80.4	80.4	48.633	433	0	243.18	By MS/MS	By MS/MS	By MS/MS	By MS/MS	By MS/MS	By MS/MS	By MS/MS	By MS/MS	3912800000	4714500000	3653600000	3124800000	3503800000	3536500000	3826000000	3659000000
P36404	P36404	2	2	2	ADP-ribosylation factor-like protein 2	ARL2	1	12.5	12.5	12.5	20.878	184	0	9.8059	By MS/MS	By matching	By matching	By MS/MS	By matching	By matching	By matching	By matching	64495000	84310000	26425000	51629000	15822000	20391000	17136000	16906000
P36405	P36405	7	7	7	ADP-ribosylation factor-like protein 3	ARL3	1	51.6	51.6	51.6	20.455	182	0	21.846	By MS/MS	By MS/MS	By MS/MS	By MS/MS	By MS/MS	By MS/MS	By MS/MS	By MS/MS	386110000	351740000	271990000	268560000	275130000	314600000	228310000	292730000
P36507	P36507	14	7	7	Dual specificity mitogen-activated protein kinase kinase 2	MAP2K2	1	46.8	30.8	30.8	44.424	400	0	47.693	By MS/MS	By MS/MS	By MS/MS	By MS/MS	By MS/MS	By MS/MS	By MS/MS	By MS/MS	270570000	301600000	239120000	189590000	201240000	179060000	227610000	262720000
P36542	P36542	11	11	11	ATP synthase subunit gamma, mitochondrial	ATP5C1	1	36.6	36.6	36.6	32.996	298	0	41.332	By MS/MS	By MS/MS	By MS/MS	By MS/MS	By MS/MS	By MS/MS	By MS/MS	By MS/MS	1377400000	1515900000	1161700000	951790000	987140000	1253300000	1430800000	1232400000
P36543	P36543	3	3	3	V-type proton ATPase subunit E 1	ATP6V1E1	1	15	15	15	26.145	226	0.0003125	6.9205	By MS/MS	By MS/MS	By MS/MS	By MS/MS	By MS/MS	By MS/MS	By MS/MS	By MS/MS	57361000	40897000	38135000	42308000	37342000	77241000	61705000	45563000
P36551	P36551	19	19	19	Oxygen-dependent coproporphyrinogen-III oxidase, mitochondrial	CPOX	1	44.3	44.3	44.3	50.151	454	0	100.46	By MS/MS	By MS/MS	By MS/MS	By MS/MS	By MS/MS	By MS/MS	By MS/MS	By MS/MS	1041400000	1087200000	931070000	719920000	741930000	697360000	1042000000	865920000
P36578	P36578	35	35	35	60S ribosomal protein L4	RPL4	1	56	56	56	47.697	427	0	323.31	By MS/MS	By MS/MS	By MS/MS	By MS/MS	By MS/MS	By MS/MS	By MS/MS	By MS/MS	19092000000	21479000000	17640000000	13778000000	16172000000	16765000000	20358000000	18965000000
P36639	P36639	5	5	5	7,8-dihydro-8-oxoguanine triphosphatase	NUDT1	1	26.9	26.9	26.9	22.519	197	0	12.148	By MS/MS	By MS/MS	By MS/MS	By MS/MS	By MS/MS	By MS/MS	By MS/MS	By MS/MS	207280000	116520000	110400000	95618000	89892000	106080000	27777000	73469000
P36776	P36776	32	32	32	Lon protease homolog, mitochondrial	LONP1	1	45	45	45	106.49	959	0	323.31	By MS/MS	By MS/MS	By MS/MS	By MS/MS	By MS/MS	By MS/MS	By MS/MS	By MS/MS	1566500000	2234400000	1631900000	1396800000	1743700000	2032800000	2655400000	1819000000
P36871	P36871	27	27	27	Phosphoglucomutase-1	PGM1	1	67.8	67.8	67.8	61.448	562	0	184.3	By MS/MS	By MS/MS	By MS/MS	By MS/MS	By MS/MS	By MS/MS	By MS/MS	By MS/MS	2238400000	2499600000	1719500000	1756700000	1533000000	1594000000	1777900000	1979900000
P36873	P36873	19	2	2	Serine/threonine-protein phosphatase PP1-gamma catalytic subunit	PPP1CC	1	52	7.4	7.4	36.983	323	0	13.352	By MS/MS	By MS/MS	By MS/MS	By MS/MS	By MS/MS	By MS/MS	By MS/MS	By MS/MS	245510000	253980000	238150000	198600000	161560000	175930000	213630000	188180000
P36915	P36915	6	6	6	Guanine nucleotide-binding protein-like 1	GNL1	1	11.5	11.5	11.5	68.66	607	0	12.406	By MS/MS	By MS/MS	By MS/MS	By MS/MS	By MS/MS	By MS/MS	By MS/MS	By MS/MS	112320000	88499000	73448000	70436000	16064000	57040000	84921000	83560000
P36954	P36954	5	5	5	DNA-directed RNA polymerase II subunit RPB9	POLR2I	1	54.4	54.4	54.4	14.523	125	0	11.662	By MS/MS	By MS/MS	By MS/MS	By MS/MS	By MS/MS	By MS/MS	By MS/MS	By MS/MS	53441000	51794000	62110000	54747000	33448000	56113000	50533000	45756000
P36957	P36957	13	13	13	Dihydrolipoyllysine-residue succinyltransferase component of 2-oxoglutarate dehydrogenase complex, mitochondrial	DLST	1	32.9	32.9	32.9	48.755	453	0	98.836	By MS/MS	By MS/MS	By MS/MS	By MS/MS	By MS/MS	By MS/MS	By MS/MS	By MS/MS	816500000	928390000	654030000	642320000	735940000	695650000	880020000	614570000
P37108	P37108	6	6	6	Signal recognition particle 14 kDa protein	SRP14	1	49.3	49.3	49.3	14.57	136	0	81.72	By MS/MS	By MS/MS	By MS/MS	By MS/MS	By MS/MS	By MS/MS	By MS/MS	By MS/MS	3075600000	3201800000	2986300000	2614900000	2235600000	538190000	2654800000	2435400000
P37198	P37198	7	7	7	Nuclear pore glycoprotein p62	NUP62	1	21.8	21.8	21.8	53.254	522	0	47.038	By MS/MS	By MS/MS	By MS/MS	By MS/MS	By MS/MS	By MS/MS	By MS/MS	By MS/MS	402770000	447150000	469340000	361300000	368590000	297850000	355220000	337910000
P37235;P84074;P61601	P37235	13;6;3	13;6;3	13;6;3	Hippocalcin-like protein 1	HPCAL1	3	66.3	66.3	66.3	22.313	193	0	65.201	By MS/MS	By MS/MS	By MS/MS	By MS/MS	By MS/MS	By MS/MS	By MS/MS	By MS/MS	1088600000	1599500000	1200900000	970860000	784840000	815820000	804160000	1133800000
P37268	P37268	3	3	3	Squalene synthase	FDFT1	1	12.7	12.7	12.7	48.115	417	0.00032268	7.7585	By MS/MS	By MS/MS	By MS/MS	By matching					17870000	25716000	29564000	35447000
P37802;Q9UI15	P37802	18;1	18;1	18;1	Transgelin-2	TAGLN2	2	89.4	89.4	89.4	22.391	199	0	323.31	By MS/MS	By MS/MS	By MS/MS	By MS/MS	By MS/MS	By MS/MS	By MS/MS	By MS/MS	17838000000	19854000000	16375000000	14446000000	16666000000	18463000000	23404000000	19730000000
P37837	P37837	17	17	17	Transaldolase	TALDO1	1	47.5	47.5	47.5	37.54	337	0	51.878	By MS/MS	By MS/MS	By MS/MS	By MS/MS	By MS/MS	By MS/MS	By MS/MS	By MS/MS	2451300000	2465100000	2043500000	1670400000	1724600000	1995000000	2249700000	2046700000
P38117	P38117	16	16	16	Electron transfer flavoprotein subunit beta	ETFB	1	61.6	61.6	61.6	27.843	255	0	136.11	By MS/MS	By MS/MS	By MS/MS	By MS/MS	By MS/MS	By MS/MS	By MS/MS	By MS/MS	1840500000	2040600000	1659100000	1356300000	1363700000	1519100000	1630600000	1664000000
P38159;O75526;Q8IZ40;Q8N7X1	P38159	25;3;1;1	25;3;1;1	8;1;0;0	RNA-binding motif protein, X chromosome;RNA-binding motif protein, X chromosome, N-terminally processed	RBMX	4	52.7	52.7	14.6	42.331	391	0	123.33	By MS/MS	By MS/MS	By MS/MS	By MS/MS	By MS/MS	By MS/MS	By MS/MS	By MS/MS	6837100000	6877900000	5076000000	4505800000	5426700000	5713800000	6183200000	6413000000
P38432	P38432	5	5	5	Coilin	COIL	1	12.8	12.8	12.8	62.608	576	0	11.601	By MS/MS	By MS/MS	By MS/MS	By MS/MS	By MS/MS	By MS/MS	By MS/MS	By MS/MS	24936000	57304000	45225000	44805000	34147000	43477000	22019000	61643000
P38571	P38571	2	2	2	Lysosomal acid lipase/cholesteryl ester hydrolase	LIPA	1	10.3	10.3	10.3	45.418	399	0.00029455	5.5692	By MS/MS	By MS/MS	By MS/MS	By MS/MS	By matching	By matching			23300000	21846000	47874000	41269000	10430000	6993500
P38606	P38606	25	25	25	V-type proton ATPase catalytic subunit A	ATP6V1A	1	58.5	58.5	58.5	68.303	617	0	166.04	By MS/MS	By MS/MS	By MS/MS	By MS/MS	By MS/MS	By MS/MS	By MS/MS	By MS/MS	2196000000	2232500000	1796200000	1531900000	2082300000	1883200000	2610400000	2080900000
P38646	P38646	48	47	47	Stress-70 protein, mitochondrial	HSPA9	1	64.8	64.8	64.8	73.68	679	0	323.31	By MS/MS	By MS/MS	By MS/MS	By MS/MS	By MS/MS	By MS/MS	By MS/MS	By MS/MS	15587000000	17918000000	14430000000	12007000000	14099000000	12377000000	15694000000	15566000000
P38919	P38919	24	19	19	Eukaryotic initiation factor 4A-III;Eukaryotic initiation factor 4A-III, N-terminally processed	EIF4A3	1	56.7	50.6	50.6	46.871	411	0	129.38	By MS/MS	By MS/MS	By MS/MS	By MS/MS	By MS/MS	By MS/MS	By MS/MS	By MS/MS	2740300000	3367900000	2505400000	2467100000	2856400000	3057400000	3456900000	3724100000
P39019	P39019	16	16	16	40S ribosomal protein S19	RPS19	1	69.7	69.7	69.7	16.06	145	0	72.728	By MS/MS	By MS/MS	By MS/MS	By MS/MS	By MS/MS	By MS/MS	By MS/MS	By MS/MS	11693000000	11741000000	9936400000	9471200000	9823300000	10691000000	11920000000	10798000000
P39023;Q92901	P39023	37;3	37;3	37;3	60S ribosomal protein L3	RPL3	2	66	66	66	46.108	403	0	282.44	By MS/MS	By MS/MS	By MS/MS	By MS/MS	By MS/MS	By MS/MS	By MS/MS	By MS/MS	21007000000	22210000000	18535000000	17356000000	20201000000	17538000000	22449000000	19654000000
P39656	P39656	16	16	16	Dolichyl-diphosphooligosaccharide--protein glycosyltransferase 48 kDa subunit	DDOST	1	50.7	50.7	50.7	50.8	456	0	143.15	By MS/MS	By MS/MS	By MS/MS	By MS/MS	By MS/MS	By MS/MS	By MS/MS	By MS/MS	2145000000	2005100000	1631500000	1336400000	1241800000	1036100000	1074100000	1358000000
P39687;O95626;O43423	P39687	13;2;2	13;2;2	10;2;2	Acidic leucine-rich nuclear phosphoprotein 32 family member A	ANP32A	3	55	55	47	28.585	249	0	271.23	By MS/MS	By MS/MS	By MS/MS	By MS/MS	By MS/MS	By MS/MS	By MS/MS	By MS/MS	2815700000	3459600000	2703600000	3116900000	2215900000	2650200000	2915500000	2561500000
P39748	P39748	18	18	18	Flap endonuclease 1	FEN1	1	54.2	54.2	54.2	42.592	380	0	305	By MS/MS	By MS/MS	By MS/MS	By MS/MS	By MS/MS	By MS/MS	By MS/MS	By MS/MS	2389700000	2889500000	2262000000	1858900000	2022500000	1755500000	2208900000	2099200000
P40121	P40121	13	13	13	Macrophage-capping protein	CAPG	1	50.6	50.6	50.6	38.498	348	0	96.429	By MS/MS	By MS/MS	By MS/MS	By MS/MS	By MS/MS	By MS/MS	By MS/MS	By MS/MS	1300000000	1371900000	1098700000	1052700000	977760000	1191600000	1107100000	1091200000
P40123	P40123	3	2	2	Adenylyl cyclase-associated protein 2	CAP2	1	8.6	6.9	6.9	52.823	477	0.00028952	5.2148	By MS/MS	By MS/MS	By MS/MS	By MS/MS	By MS/MS	By MS/MS	By matching	By matching	16151000		17506000		9545300	29322000	17836000
P40222;Q8N3L3	P40222	18;1	18;1	17;0	Alpha-taxilin	TXLNA	2	47.1	47.1	45.6	61.89	546	0	187.54	By MS/MS	By MS/MS	By MS/MS	By MS/MS	By MS/MS	By MS/MS	By MS/MS	By MS/MS	801860000	874260000	667450000	596630000	492370000	598640000	589140000	426120000
P40227	P40227	40	40	33	T-complex protein 1 subunit zeta	CCT6A	1	74.2	74.2	64.4	58.024	531	0	323.31	By MS/MS	By MS/MS	By MS/MS	By MS/MS	By MS/MS	By MS/MS	By MS/MS	By MS/MS	16258000000	16897000000	13297000000	13077000000	12672000000	14044000000	14173000000	16192000000
P40261	P40261	11	11	11	Nicotinamide N-methyltransferase	NNMT	1	48.5	48.5	48.5	29.574	264	0	147.42	By MS/MS	By MS/MS	By MS/MS	By MS/MS	By MS/MS	By MS/MS	By MS/MS	By MS/MS	574700000	690500000	661660000	506920000	2512500000	3158800000	3880300000	2985700000
P40306	P40306	8	8	8	Proteasome subunit beta type-10	PSMB10	1	52.7	52.7	52.7	28.936	273	0	80.122	By matching				By MS/MS	By MS/MS	By MS/MS	By MS/MS	25049000				898730000	761400000	1096900000	728570000
P40429;Q6NVV1	P40429	16;5	16;5	16;5	60S ribosomal protein L13a	RPL13A	2	53.7	53.7	53.7	23.577	203	0	53.951	By MS/MS	By MS/MS	By MS/MS	By MS/MS	By MS/MS	By MS/MS	By MS/MS	By MS/MS	6128000000	7570500000	6045600000	5804100000	7017700000	5457400000	6861800000	7075500000
P40616	P40616	7	7	7	ADP-ribosylation factor-like protein 1	ARL1	1	60.2	60.2	60.2	20.417	181	0	78.029	By MS/MS	By MS/MS	By MS/MS	By MS/MS	By MS/MS	By MS/MS	By MS/MS	By MS/MS	474910000	500090000	356130000	319330000	271150000	228720000	369350000	385870000
P40692	P40692	8	8	8	DNA mismatch repair protein Mlh1	MLH1	1	13.9	13.9	13.9	84.6	756	0	11.968	By MS/MS	By MS/MS	By MS/MS	By MS/MS	By matching	By matching	By MS/MS	By matching	91581000	106160000	56621000	69075000	46407000	56620000	37804000	45770000
P40763	P40763	11	11	11	Signal transducer and activator of transcription 3	STAT3	1	24	24	24	88.067	770	0	111.61	By MS/MS	By MS/MS	By MS/MS	By MS/MS	By MS/MS	By MS/MS	By MS/MS	By MS/MS	183960000	365230000	196980000	266500000	428800000	407470000	500490000	496800000
P40818	P40818	3	3	3	Ubiquitin carboxyl-terminal hydrolase 8	USP8	1	4.2	4.2	4.2	127.52	1118	0.0002918	5.4012	By MS/MS	By MS/MS	By MS/MS	By MS/MS	By MS/MS		By MS/MS	By matching	15977000	19128000	15520000	13866000	14392000		22729000	13562000
P40855	P40855	8	8	8	Peroxisomal biogenesis factor 19	PEX19	1	35.8	35.8	35.8	32.806	299	0	181.04	By MS/MS	By MS/MS	By MS/MS	By MS/MS	By MS/MS	By MS/MS	By MS/MS	By MS/MS	134580000	121320000	120680000	109870000	193140000	158990000	175080000	223200000
P40925	P40925	19	19	19	Malate dehydrogenase, cytoplasmic	MDH1	1	52.7	52.7	52.7	36.426	334	0	159.67	By MS/MS	By MS/MS	By MS/MS	By MS/MS	By MS/MS	By MS/MS	By MS/MS	By MS/MS	5045000000	5472700000	4689300000	3886300000	3571200000	3530400000	3748700000	3702200000
P40926	P40926	20	20	20	Malate dehydrogenase, mitochondrial	MDH2	1	64.5	64.5	64.5	35.503	338	0	304.99	By MS/MS	By MS/MS	By MS/MS	By MS/MS	By MS/MS	By MS/MS	By MS/MS	By MS/MS	14472000000	15460000000	12600000000	10790000000	13069000000	13480000000	18433000000	12620000000
P40937	P40937	11	11	11	Replication factor C subunit 5	RFC5	1	44.4	44.4	44.4	38.496	340	0	47.584	By MS/MS	By MS/MS	By MS/MS	By MS/MS	By MS/MS	By MS/MS	By MS/MS	By MS/MS	290560000	515500000	366960000	322770000	262730000	203270000	316100000	166180000
P40938	P40938	11	11	11	Replication factor C subunit 3	RFC3	1	41	41	41	40.556	356	0	58.03	By MS/MS	By MS/MS	By MS/MS	By MS/MS	By MS/MS	By MS/MS	By MS/MS	By MS/MS	682870000	449450000	513520000	839310000	464540000	1003200000	543440000	304130000
P40939	P40939	33	33	33	Trifunctional enzyme subunit alpha, mitochondrial;Long-chain enoyl-CoA hydratase;Long chain 3-hydroxyacyl-CoA dehydrogenase	HADHA	1	58.2	58.2	58.2	82.999	763	0	323.31	By MS/MS	By MS/MS	By MS/MS	By MS/MS	By MS/MS	By MS/MS	By MS/MS	By MS/MS	3182700000	3221000000	2736200000	2012000000	2884500000	2828100000	3404600000	3004600000
P41091;Q2VIR3	P41091;Q2VIR3	25;20	25;20	25;20	Eukaryotic translation initiation factor 2 subunit 3;Putative eukaryotic translation initiation factor 2 subunit 3-like protein	EIF2S3;EIF2S3L	2	61.7	61.7	61.7	51.109	472	0	217.94	By MS/MS	By MS/MS	By MS/MS	By MS/MS	By MS/MS	By MS/MS	By MS/MS	By MS/MS	6414900000	6934000000	5309100000	4652900000	5242100000	5201100000	5864600000	5245100000
P41134	P41134	2	2	2	DNA-binding protein inhibitor ID-1	ID1	1	14.8	14.8	14.8	16.132	155	0.0053411	2.2096		By MS/MS	By MS/MS	By MS/MS				By matching		11579000	6402900	7766500				4740300
P41214	P41214	12	12	12	Eukaryotic translation initiation factor 2D	EIF2D	1	30.5	30.5	30.5	64.706	584	0	36.131	By MS/MS	By MS/MS	By MS/MS	By MS/MS	By MS/MS	By MS/MS	By MS/MS	By MS/MS	210570000	358080000	324830000	260740000	255470000	246030000	150200000	167630000
P41223	P41223	11	11	11	Protein BUD31 homolog	BUD31	1	63.2	63.2	63.2	17	144	0	33.652	By MS/MS	By MS/MS	By MS/MS	By MS/MS	By MS/MS	By MS/MS	By MS/MS	By MS/MS	389970000	432190000	441900000	456480000	233080000	321360000	421890000	329020000
P41226	P41226	4	4	4	Ubiquitin-like modifier-activating enzyme 7	UBA7	1	7.3	7.3	7.3	111.69	1012	0	18.564					By MS/MS	By MS/MS	By MS/MS	By MS/MS					69419000	59339000	42653000	44802000
P41227;Q9BSU3	P41227	15;4	15;4	15;4	N-alpha-acetyltransferase 10	NAA10	2	81.7	81.7	81.7	26.458	235	0	200.21	By MS/MS	By MS/MS	By MS/MS	By MS/MS	By MS/MS	By MS/MS	By MS/MS	By MS/MS	1005000000	1227900000	940510000	821320000	926260000	779270000	991580000	971360000
P41240;P42679	P41240	16;1	16;1	16;1	Tyrosine-protein kinase CSK	CSK	2	46	46	46	50.704	450	0	92.516	By MS/MS	By MS/MS	By MS/MS	By MS/MS	By MS/MS	By MS/MS	By MS/MS	By MS/MS	559650000	671010000	533940000	363640000	391130000	431940000	426730000	525100000
P41250	P41250	37	37	37	Glycine--tRNA ligase	GARS	1	55.1	55.1	55.1	83.165	739	0	323.31	By MS/MS	By MS/MS	By MS/MS	By MS/MS	By MS/MS	By MS/MS	By MS/MS	By MS/MS	5351900000	6162600000	5107200000	4497900000	5498800000	5203300000	5513800000	6017000000
P41252	P41252	46	46	46	Isoleucine--tRNA ligase, cytoplasmic	IARS	1	45.6	45.6	45.6	144.5	1262	0	323.31	By MS/MS	By MS/MS	By MS/MS	By MS/MS	By MS/MS	By MS/MS	By MS/MS	By MS/MS	3810700000	4417900000	3474100000	3229400000	2950800000	2844600000	2682600000	3169700000
P41567	P41567	10	10	6	Eukaryotic translation initiation factor 1	EIF1	1	81.4	81.4	46	12.732	113	0	133.31	By MS/MS	By MS/MS	By MS/MS	By MS/MS	By MS/MS	By MS/MS	By MS/MS	By MS/MS	1874500000	2443100000	2098200000	1973900000	1848400000	2519400000	3576100000	2403400000
P41743	P41743	4	4	4	Protein kinase C iota type	PRKCI	1	14.6	14.6	14.6	68.262	596	0	16.286	By MS/MS	By MS/MS	By MS/MS	By MS/MS	By matching	By matching	By MS/MS	By MS/MS	140170000	105900000	89872000	48635000	12876000	34949000	65477000	44976000
P42025	P42025	11	4	4	Beta-centractin	ACTR1B	1	45.5	22.9	22.9	42.293	376	0	15.62	By MS/MS	By MS/MS	By MS/MS	By MS/MS	By MS/MS	By MS/MS	By matching	By MS/MS	39000000	233470000	131560000	105760000	83736000	91746000	35721000	78058000
P42126	P42126	2	2	2	Enoyl-CoA delta isomerase 1, mitochondrial	ECI1	1	9.3	9.3	9.3	32.816	302	0.0002798	4.4438	By MS/MS	By MS/MS	By matching	By MS/MS	By MS/MS	By MS/MS	By MS/MS	By MS/MS	85673000	128070000	10640000		55682000	65946000	78377000	75914000
P42166	P42166	33	33	24	Lamina-associated polypeptide 2, isoform alpha;Thymopoietin;Thymopentin	TMPO	1	63.3	63.3	42.7	75.491	694	0	323.31	By MS/MS	By MS/MS	By MS/MS	By MS/MS	By MS/MS	By MS/MS	By MS/MS	By MS/MS	2718100000	3480500000	2523400000	2247900000	2350100000	2736900000	2571300000	2693000000
P42167	P42167	20	11	11	Lamina-associated polypeptide 2, isoforms beta/gamma;Thymopoietin;Thymopentin	TMPO	1	61.9	30.4	30.4	50.67	454	0	137.84	By MS/MS	By MS/MS	By MS/MS	By MS/MS	By MS/MS	By MS/MS	By MS/MS	By MS/MS	1028700000	1078300000	698020000	643880000	937500000	900800000	1106700000	929420000
P42224;Q14765	P42224	42;1	42;1	42;1	Signal transducer and activator of transcription 1-alpha/beta	STAT1	2	62.4	62.4	62.4	87.334	750	0	323.31	By MS/MS	By MS/MS	By MS/MS	By MS/MS	By MS/MS	By MS/MS	By MS/MS	By MS/MS	1132800000	1104700000	966210000	808730000	7563800000	7933200000	8821400000	8504500000
P42226	P42226	5	5	5	Signal transducer and activator of transcription 6	STAT6	1	7	7	7	94.134	847	0	9.0349	By MS/MS	By MS/MS	By MS/MS	By MS/MS	By MS/MS	By MS/MS	By MS/MS	By MS/MS	47522000	65272000	47640000	10759000	31766000	37420000	37960000	83275000
P42285	P42285	32	32	32	Superkiller viralicidic activity 2-like 2	SKIV2L2	1	41.5	41.5	41.5	117.8	1042	0	136.93	By MS/MS	By MS/MS	By MS/MS	By MS/MS	By MS/MS	By MS/MS	By MS/MS	By MS/MS	1716300000	1671500000	1769700000	1485300000	1209100000	1219500000	1353200000	1578000000
P42330;P17516	P42330	13;5	13;5	6;0	Aldo-keto reductase family 1 member C3	AKR1C3	2	55.4	55.4	35.9	36.853	323	0	95.347	By MS/MS	By MS/MS	By MS/MS	By MS/MS	By MS/MS	By MS/MS	By MS/MS	By MS/MS	1194400000	1461200000	900160000	853740000	482280000	595480000	806760000	613720000
P42345	P42345	8	8	8	Serine/threonine-protein kinase mTOR	MTOR	1	4.6	4.6	4.6	288.89	2549	0	17.814	By MS/MS	By MS/MS	By MS/MS	By MS/MS	By MS/MS	By MS/MS	By MS/MS	By MS/MS	78955000	110840000	70179000	43074000	51849000	40409000	125620000	95471000
P42566	P42566	10	10	10	Epidermal growth factor receptor substrate 15	EPS15	1	17.5	17.5	17.5	98.655	896	0	26.361	By MS/MS	By MS/MS	By MS/MS	By MS/MS	By MS/MS	By MS/MS	By MS/MS	By MS/MS	82200000	228480000	177370000	129980000	116350000	111050000	95823000	130690000
P42574	P42574	5	5	5	Caspase-3;Caspase-3 subunit p17;Caspase-3 subunit p12	CASP3	1	26.7	26.7	26.7	31.608	277	0	28.5	By MS/MS	By MS/MS	By MS/MS	By MS/MS	By MS/MS	By MS/MS	By MS/MS	By MS/MS	157230000	154210000	132850000	120670000	133460000	113250000	121410000	170000000
P42575	P42575	3	3	3	Caspase-2;Caspase-2 subunit p18;Caspase-2 subunit p13;Caspase-2 subunit p12	CASP2	1	9.5	9.5	9.5	50.685	452	0.0002963	5.7341	By MS/MS	By matching	By MS/MS	By MS/MS	By matching	By MS/MS	By MS/MS		45016000	29702000	40512000	37675000	8160300	8952500	7129900
P42677	P42677	7	7	3	40S ribosomal protein S27	RPS27	1	75	75	15.5	9.461	84	0	36.051	By MS/MS	By MS/MS	By MS/MS	By MS/MS	By MS/MS	By MS/MS	By MS/MS	By MS/MS	4299600000	4108400000	3366100000	2938200000	3367100000	3474000000	3649500000	3689800000
P42695	P42695	4	4	4	Condensin-2 complex subunit D3	NCAPD3	1	3.9	3.9	3.9	168.89	1498	0.00029214	5.4187	By MS/MS	By MS/MS	By MS/MS	By MS/MS	By matching	By MS/MS	By MS/MS	By matching	249260000	249980000	205070000	190490000	106870000	143530000	129450000	131930000
P42696	P42696	10	10	10	RNA-binding protein 34	RBM34	1	30.9	30.9	30.9	48.564	430	0	19.697	By MS/MS	By MS/MS	By MS/MS	By MS/MS	By MS/MS	By MS/MS	By MS/MS	By MS/MS	209560000	309380000	204660000	171580000	288790000	278940000	262420000	221000000
P42704;Q9NP80	P42704	68;1	68;1	68;1	Leucine-rich PPR motif-containing protein, mitochondrial	LRPPRC	2	59.1	59.1	59.1	157.9	1394	0	323.31	By MS/MS	By MS/MS	By MS/MS	By MS/MS	By MS/MS	By MS/MS	By MS/MS	By MS/MS	4635800000	5286600000	4479000000	3607300000	3966500000	3616100000	5176800000	4539000000
P42765	P42765	10	10	10	3-ketoacyl-CoA thiolase, mitochondrial	ACAA2	1	36.3	36.3	36.3	41.924	397	0	33.534	By MS/MS	By MS/MS	By MS/MS	By MS/MS	By MS/MS	By MS/MS	By MS/MS	By MS/MS	246060000	197970000	255200000	267110000	141860000	281350000	185370000	242700000
P42766	P42766	9	9	9	60S ribosomal protein L35	RPL35	1	43.9	43.9	43.9	14.551	123	0	55.301	By MS/MS	By MS/MS	By MS/MS	By MS/MS	By MS/MS	By MS/MS	By MS/MS	By MS/MS	6049500000	7371200000	5029800000	4924400000	6135100000	5884100000	6355500000	5479300000
P42785	P42785	2	2	2	Lysosomal Pro-X carboxypeptidase	PRCP	1	5.4	5.4	5.4	55.799	496	0.00027211	3.9398	By MS/MS	By MS/MS	By MS/MS	By MS/MS	By matching	By matching	By matching	By matching	29257000	42171000	35849000	29463000	3814200	9695100	5509400	20547000
P43007	P43007	2	2	2	Neutral amino acid transporter A	SLC1A4	1	9.4	9.4	9.4	55.722	532	0	16.693		By MS/MS	By matching	By MS/MS	By MS/MS	By MS/MS	By MS/MS	By MS/MS		42697000	17375000	15925000	36220000	10499000	18178000	56351000
P43034	P43034	20	20	20	Platelet-activating factor acetylhydrolase IB subunit alpha	PAFAH1B1	1	61	61	61	46.637	410	0	117	By MS/MS	By MS/MS	By MS/MS	By MS/MS	By MS/MS	By MS/MS	By MS/MS	By MS/MS	1971800000	2114700000	1704500000	1474800000	1689100000	1471200000	1809000000	1751700000
P43121	P43121	9	9	9	Cell surface glycoprotein MUC18	MCAM	1	17.6	17.6	17.6	71.607	646	0	44.537	By MS/MS	By MS/MS	By MS/MS	By MS/MS	By MS/MS	By MS/MS	By MS/MS	By MS/MS	163410000	294640000	246280000	219650000	106180000	104270000	111720000	65812000
P43243	P43243	40	40	40	Matrin-3	MATR3	1	50.1	50.1	50.1	94.622	847	0	323.31	By MS/MS	By MS/MS	By MS/MS	By MS/MS	By MS/MS	By MS/MS	By MS/MS	By MS/MS	8994400000	10272000000	8553200000	7499200000	7969600000	8082200000	11196000000	10035000000
P43246	P43246	31	31	31	DNA mismatch repair protein Msh2	MSH2	1	45.9	45.9	45.9	104.74	934	0	200.51	By MS/MS	By MS/MS	By MS/MS	By MS/MS	By MS/MS	By MS/MS	By MS/MS	By MS/MS	1595700000	1779200000	1421200000	1254500000	964750000	1093700000	1150700000	1135600000
P43304	P43304	18	18	18	Glycerol-3-phosphate dehydrogenase, mitochondrial	GPD2	1	35.2	35.2	35.2	80.852	727	0	82.872	By MS/MS	By MS/MS	By MS/MS	By MS/MS	By MS/MS	By MS/MS	By MS/MS	By MS/MS	384020000	504880000	388800000	305070000	353880000	312650000	380580000	363800000
P43307	P43307	3	3	3	Translocon-associated protein subunit alpha	SSR1	1	11.9	11.9	11.9	32.235	286	0.00032648	8.1229	By MS/MS	By MS/MS	By MS/MS	By MS/MS	By MS/MS	By MS/MS	By MS/MS	By MS/MS	301210000	287030000	230120000	216500000	219950000	197940000	315660000	280270000
P43358;P43361;P43355;P43362;A2A368;A8MXT2;Q96M61;O15480	P43358	19;3;2;2;1;1;1;1	19;3;2;2;1;1;1;1	16;2;1;0;0;0;0;0	Melanoma-associated antigen 4	MAGEA4	8	54.6	54.6	47	34.899	317	0	323.31	By MS/MS	By MS/MS	By MS/MS	By MS/MS	By MS/MS	By MS/MS	By MS/MS	By MS/MS	13518000000	19800000000	13440000000	11220000000	9646000000	14097000000	13329000000	11796000000
P43360;P43357;P43356;P43365	P43360;P43357;P43356	3;2;2;1	3;2;2;1	3;2;2;1	Melanoma-associated antigen 6;Melanoma-associated antigen 3;Melanoma-associated antigen 2	MAGEA6;MAGEA3;MAGEA2	4	12.1	12.1	12.1	34.891	314	0.00030941	6.6992	By MS/MS	By MS/MS	By MS/MS	By MS/MS	By matching	By matching		By matching	20543000	107780000	41740000	54954000	5172300	20054000		16107000
P43363	P43363	5	2	2	Melanoma-associated antigen 10	MAGEA10	1	13.8	7.3	7.3	40.78	369	0	15.533	By MS/MS	By MS/MS	By MS/MS	By MS/MS	By MS/MS	By MS/MS	By MS/MS	By MS/MS	335850000	383250000	363900000	326460000	271010000	264230000	203160000	375770000
P43487;Q9C010	P43487	12;1	12;1	12;1	Ran-specific GTPase-activating protein	RANBP1	2	70.1	70.1	70.1	23.31	201	0	251.46	By MS/MS	By MS/MS	By MS/MS	By MS/MS	By MS/MS	By MS/MS	By MS/MS	By MS/MS	4351400000	4642600000	3865800000	3611800000	3643800000	4156800000	4520400000	4262200000
P43490	P43490	25	25	25	Nicotinamide phosphoribosyltransferase	NAMPT	1	56.8	56.8	56.8	55.52	491	0	323.31	By MS/MS	By MS/MS	By MS/MS	By MS/MS	By MS/MS	By MS/MS	By MS/MS	By MS/MS	1775000000	2388000000	1972400000	1653300000	3090800000	3169900000	3952800000	3688900000
P43686	P43686	26	26	26	26S protease regulatory subunit 6B	PSMC4	1	78.5	78.5	78.5	47.366	418	0	253.41	By MS/MS	By MS/MS	By MS/MS	By MS/MS	By MS/MS	By MS/MS	By MS/MS	By MS/MS	3075000000	3393500000	2575800000	2274100000	2952700000	2919700000	3370400000	3241500000
P43897	P43897	10	10	10	Elongation factor Ts, mitochondrial	TSFM	1	44	44	44	35.39	325	0	86.677	By MS/MS	By MS/MS	By MS/MS	By MS/MS	By MS/MS	By MS/MS	By MS/MS	By MS/MS	405100000	566350000	367780000	295110000	301450000	265500000	381050000	545180000
P45880	P45880	15	15	15	Voltage-dependent anion-selective channel protein 2	VDAC2	1	62.9	62.9	62.9	31.566	294	0	306.42	By MS/MS	By MS/MS	By MS/MS	By MS/MS	By MS/MS	By MS/MS	By MS/MS	By MS/MS	3145000000	3620100000	2519200000	2128600000	2620900000	2317700000	3105600000	2926100000
P45954	P45954	2	2	2	Short/branched chain specific acyl-CoA dehydrogenase, mitochondrial	ACADSB	1	7.4	7.4	7.4	47.485	432	0.00026853	3.6973			By MS/MS		By MS/MS	By MS/MS	By matching				48324000		46681000	43496000	35562000
P45973	P45973	8	7	7	Chromobox protein homolog 5	CBX5	1	56.5	50.3	50.3	22.225	191	0	28.771	By MS/MS	By MS/MS	By MS/MS	By MS/MS	By MS/MS	By MS/MS	By MS/MS	By MS/MS	347210000	459620000	348520000	211720000	269420000	144890000	306670000	207760000
P45974;Q92995	P45974	27;2	27;2	27;2	Ubiquitin carboxyl-terminal hydrolase 5	USP5	2	44.2	44.2	44.2	95.785	858	0	218.49	By MS/MS	By MS/MS	By MS/MS	By MS/MS	By MS/MS	By MS/MS	By MS/MS	By MS/MS	2436000000	2847800000	2419600000	2053500000	2055100000	2184400000	2541600000	2670200000
P45984	P45984	2	2	2	Mitogen-activated protein kinase 9	MAPK9	1	8.7	8.7	8.7	48.139	424	0.0032379	2.5425	By MS/MS	By MS/MS	By MS/MS	By MS/MS	By matching	By matching	By MS/MS	By matching	70785000	477710000	467900000	416860000	297430000	279140000	157630000	300350000
P45985	P45985	2	2	2	Dual specificity mitogen-activated protein kinase kinase 4	MAP2K4	1	6.8	6.8	6.8	44.287	399	0.00027012	3.78	By MS/MS	By MS/MS	By MS/MS	By matching	By MS/MS	By matching	By MS/MS	By MS/MS	82930000	51361000	35168000	8057000	57903000	13959000	56647000	31639000
P46013	P46013	59	59	59	Antigen KI-67	MKI67	1	31.3	31.3	31.3	358.69	3256	0	221.48	By MS/MS	By MS/MS	By MS/MS	By MS/MS	By MS/MS	By MS/MS	By MS/MS	By MS/MS	1468000000	1986200000	1822500000	1556500000	709110000	810450000	860130000	903970000
P46060	P46060	30	30	30	Ran GTPase-activating protein 1	RANGAP1	1	51.4	51.4	51.4	63.541	587	0	132.24	By MS/MS	By MS/MS	By MS/MS	By MS/MS	By MS/MS	By MS/MS	By MS/MS	By MS/MS	2655900000	2700100000	2076200000	1832700000	1264400000	1850100000	2144100000	1705400000
P46063	P46063	31	31	31	ATP-dependent DNA helicase Q1	RECQL	1	66.3	66.3	66.3	73.457	649	0	320.24	By MS/MS	By MS/MS	By MS/MS	By MS/MS	By MS/MS	By MS/MS	By MS/MS	By MS/MS	1715000000	1922300000	1547500000	1320400000	1527800000	1732200000	1818400000	2163000000
P46087	P46087	31	31	31	Probable 28S rRNA (cytosine(4447)-C(5))-methyltransferase	NOP2	1	39.4	39.4	39.4	89.301	812	0	178.56	By MS/MS	By MS/MS	By MS/MS	By MS/MS	By MS/MS	By MS/MS	By MS/MS	By MS/MS	2245500000	2660900000	2302000000	1924400000	2414200000	2633600000	2990100000	2321600000
P46100	P46100	3	3	3	Transcriptional regulator ATRX	ATRX	1	1.3	1.3	1.3	282.58	2492	0.0025419	2.812	By matching	By MS/MS	By MS/MS			By matching			8935700	17560000	138130000			6379700
P46108	P46108	13	13	13	Adapter molecule crk	CRK	1	59.9	59.9	59.9	33.83	304	0	44.548	By MS/MS	By MS/MS	By MS/MS	By MS/MS	By MS/MS	By MS/MS	By MS/MS	By MS/MS	441920000	469110000	331810000	315550000	378530000	409750000	398070000	419940000
P46109	P46109	8	8	8	Crk-like protein	CRKL	1	37.3	37.3	37.3	33.777	303	0	29.256	By MS/MS	By MS/MS	By MS/MS	By MS/MS	By MS/MS	By MS/MS	By MS/MS	By MS/MS	123100000	214810000	137400000	122730000	160530000	125920000	140460000	196840000
P46379	P46379	19	19	19	Large proline-rich protein BAG6	BAG6	1	27.1	27.1	27.1	119.41	1132	0	94.988	By MS/MS	By MS/MS	By MS/MS	By MS/MS	By MS/MS	By MS/MS	By MS/MS	By MS/MS	715680000	1016100000	670510000	548030000	578920000	808760000	778780000	627160000
P46459	P46459	21	21	21	Vesicle-fusing ATPase	NSF	1	38.2	38.2	38.2	82.593	744	0	78.735	By MS/MS	By MS/MS	By MS/MS	By MS/MS	By MS/MS	By MS/MS	By MS/MS	By MS/MS	478220000	999150000	658670000	642330000	569320000	645110000	848870000	687070000
P46734;P52564	P46734	8;1	8;1	8;1	Dual specificity mitogen-activated protein kinase kinase 3	MAP2K3	2	32.6	32.6	32.6	39.318	347	0	27.197	By MS/MS	By MS/MS	By MS/MS	By MS/MS	By MS/MS	By MS/MS	By MS/MS	By MS/MS	156380000	305850000	142960000	114030000	127370000	99244000	52278000	62351000
P46736	P46736	7	7	7	Lys-63-specific deubiquitinase BRCC36	BRCC3	1	32	32	32	36.072	316	0	19.874	By MS/MS	By MS/MS	By MS/MS	By MS/MS	By MS/MS	By MS/MS	By MS/MS	By MS/MS	135160000	197430000	157210000	156030000	98616000	160640000	99283000	112860000
P46776	P46776	9	9	9	60S ribosomal protein L27a	RPL27A	1	45.9	45.9	45.9	16.561	148	0	135.66	By MS/MS	By MS/MS	By MS/MS	By MS/MS	By MS/MS	By MS/MS	By MS/MS	By MS/MS	5580700000	4853300000	4533600000	3468700000	4621200000	4064900000	6763300000	5021200000
P46777	P46777	22	22	22	60S ribosomal protein L5	RPL5	1	59.9	59.9	59.9	34.362	297	0	202.35	By MS/MS	By MS/MS	By MS/MS	By MS/MS	By MS/MS	By MS/MS	By MS/MS	By MS/MS	10665000000	11098000000	9244100000	8152000000	8784900000	10081000000	10879000000	9883600000
P46778	P46778	11	11	11	60S ribosomal protein L21	RPL21	1	57.5	57.5	57.5	18.565	160	0	87.427	By MS/MS	By MS/MS	By MS/MS	By MS/MS	By MS/MS	By MS/MS	By MS/MS	By MS/MS	5860100000	5405100000	4787100000	4151400000	5071400000	6264900000	6253800000	5294600000
P46779	P46779	13	13	13	60S ribosomal protein L28	RPL28	1	59.1	59.1	59.1	15.747	137	0	90.629	By MS/MS	By MS/MS	By MS/MS	By MS/MS	By MS/MS	By MS/MS	By MS/MS	By MS/MS	7574600000	8357700000	6758900000	6188500000	7011200000	6589100000	8081600000	7118900000
P46781	P46781	19	19	19	40S ribosomal protein S9	RPS9	1	62.4	62.4	62.4	22.591	194	0	65.326	By MS/MS	By MS/MS	By MS/MS	By MS/MS	By MS/MS	By MS/MS	By MS/MS	By MS/MS	13102000000	13635000000	11570000000	10107000000	12688000000	12051000000	14378000000	12839000000
P46782	P46782	17	17	17	40S ribosomal protein S5;40S ribosomal protein S5, N-terminally processed	RPS5	1	72.5	72.5	72.5	22.876	204	0	263.87	By MS/MS	By MS/MS	By MS/MS	By MS/MS	By MS/MS	By MS/MS	By MS/MS	By MS/MS	13104000000	15473000000	12530000000	10545000000	13287000000	12375000000	14973000000	13969000000
P46783;Q9NQ39	P46783	18;7	17;6	17;6	40S ribosomal protein S10	RPS10	2	76.4	72.1	72.1	18.898	165	0	140.61	By MS/MS	By MS/MS	By MS/MS	By MS/MS	By MS/MS	By MS/MS	By MS/MS	By MS/MS	10606000000	11738000000	10099000000	9331600000	10075000000	9299400000	12239000000	10089000000
P46821	P46821	51	51	50	Microtubule-associated protein 1B;MAP1B heavy chain;MAP1 light chain LC1	MAP1B	1	32.3	32.3	31.8	270.63	2468	0	323.31	By MS/MS	By MS/MS	By MS/MS	By MS/MS	By MS/MS	By MS/MS	By MS/MS	By MS/MS	990610000	1062500000	944910000	848710000	1600700000	1487700000	1768900000	1787600000
P46926	P46926	14	14	10	Glucosamine-6-phosphate isomerase 1	GNPDA1	1	73.4	73.4	52.6	32.668	289	0	96.587	By MS/MS	By MS/MS	By MS/MS	By MS/MS	By MS/MS	By MS/MS	By MS/MS	By MS/MS	1713700000	1900300000	1619600000	1407000000	1559900000	1436200000	1797300000	1692300000
P46937;Q86UL8;Q96QZ7	P46937	11;1;1	11;1;1	11;1;1	Transcriptional coactivator YAP1	YAP1	3	38.5	38.5	38.5	54.461	504	0	89.286	By MS/MS	By MS/MS	By MS/MS	By MS/MS	By MS/MS	By MS/MS	By MS/MS	By MS/MS	176500000	272330000	208190000	172790000	216400000	246340000	365420000	332990000
P46939;P11532	P46939	8;1	8;1	8;1	Utrophin	UTRN	2	2.8	2.8	2.8	394.46	3433	0	15.293	By MS/MS	By MS/MS	By MS/MS	By MS/MS	By MS/MS	By MS/MS	By MS/MS	By MS/MS	17023000	49858000	47781000	23071000	83232000	11963000	57137000	39548000
P46940	P46940	79	79	78	Ras GTPase-activating-like protein IQGAP1	IQGAP1	1	59.7	59.7	59.2	189.25	1657	0	323.31	By MS/MS	By MS/MS	By MS/MS	By MS/MS	By MS/MS	By MS/MS	By MS/MS	By MS/MS	7166100000	7331400000	5905900000	5375300000	5593800000	5685400000	7040900000	7077900000
P46976	P46976	5	5	5	Glycogenin-1	GYG1	1	18	18	18	39.383	350	0	29.733	By MS/MS	By MS/MS	By MS/MS	By MS/MS	By MS/MS	By MS/MS	By MS/MS	By MS/MS	176150000	235660000	183130000	166610000	164430000	121610000	314480000	162010000
P46977	P46977	9	8	8	Dolichyl-diphosphooligosaccharide--protein glycosyltransferase subunit STT3A	STT3A	1	12.5	11.5	11.5	80.529	705	0	17.021	By MS/MS	By MS/MS	By MS/MS	By MS/MS	By MS/MS	By MS/MS	By MS/MS	By MS/MS	397510000	489170000	425010000	328990000	434920000	262770000	288290000	540630000
P47224	P47224	2	2	2	Guanine nucleotide exchange factor MSS4	RABIF	1	25.2	25.2	25.2	13.839	123	0.00028035	4.4847	By MS/MS	By MS/MS	By MS/MS	By MS/MS	By MS/MS	By MS/MS		By MS/MS	35211000	73994000	38815000	31021000	23873000	24782000		42696000
P47755	P47755	11	9	9	F-actin-capping protein subunit alpha-2	CAPZA2	1	60.5	51	51	32.949	286	0	70.705	By MS/MS	By MS/MS	By MS/MS	By MS/MS	By MS/MS	By MS/MS	By MS/MS	By MS/MS	727540000	836930000	712370000	646610000	506760000	584350000	686060000	542260000
P47756	P47756	16	16	16	F-actin-capping protein subunit beta	CAPZB	1	65.3	65.3	65.3	31.35	277	0	179.07	By MS/MS	By MS/MS	By MS/MS	By MS/MS	By MS/MS	By MS/MS	By MS/MS	By MS/MS	3146600000	3615400000	2740400000	2589500000	2387200000	2558300000	2752500000	2440400000
P47813;O14602	P47813;O14602	9;7	9;7	9;7	Eukaryotic translation initiation factor 1A, X-chromosomal;Eukaryotic translation initiation factor 1A, Y-chromosomal	EIF1AX;EIF1AY	2	49.3	49.3	49.3	16.46	144	0	56.801	By MS/MS	By MS/MS	By MS/MS	By MS/MS	By MS/MS	By MS/MS	By MS/MS	By MS/MS	1209000000	1308200000	1076900000	1032600000	1089800000	1117200000	1116100000	1016000000
P47895;O94788;P00352	P47895	27;2;1	27;2;1	25;1;0	Aldehyde dehydrogenase family 1 member A3	ALDH1A3	3	61.1	61.1	58	56.108	512	0	301.64	By MS/MS	By MS/MS	By MS/MS	By MS/MS	By MS/MS	By MS/MS	By MS/MS	By MS/MS	4320500000	4502800000	3813500000	3217900000	3785200000	3689300000	4569000000	4447800000
P47897	P47897	48	47	47	Glutamine--tRNA ligase	QARS	1	71.2	71.2	71.2	87.798	775	0	323.31	By MS/MS	By MS/MS	By MS/MS	By MS/MS	By MS/MS	By MS/MS	By MS/MS	By MS/MS	3725500000	4048400000	3096800000	3112800000	3193900000	3328200000	3782000000	3288400000
P47914	P47914	6	6	6	60S ribosomal protein L29	RPL29	1	27	27	27	17.752	159	0	14.618	By MS/MS	By MS/MS	By MS/MS	By MS/MS	By MS/MS	By MS/MS	By MS/MS	By MS/MS	3368700000	3713600000	2776400000	2340600000	2803000000	2721000000	3746000000	2862500000
P47974	P47974	2	2	2	Zinc finger protein 36, C3H1 type-like 2	ZFP36L2	1	5.9	5.9	5.9	51.062	494	0.00028361	4.7813	By MS/MS	By MS/MS	By MS/MS	By MS/MS		By matching			14239000	11536000	11423000	8719500		7147200
P47985;P0C7P4	P47985;P0C7P4	7;6	7;6	7;6	Cytochrome b-c1 complex subunit Rieske, mitochondrial;Cytochrome b-c1 complex subunit 11;Putative cytochrome b-c1 complex subunit Rieske-like protein 1	UQCRFS1;UQCRFS1P1	2	35.8	35.8	35.8	29.668	274	0	33.91	By MS/MS	By MS/MS	By MS/MS	By MS/MS	By MS/MS	By MS/MS	By MS/MS	By MS/MS	842470000	845510000	569740000	599390000	531740000	313180000	576910000	782110000
P48047	P48047	10	10	10	ATP synthase subunit O, mitochondrial	ATP5O	1	58.2	58.2	58.2	23.277	213	0	223.5	By MS/MS	By MS/MS	By MS/MS	By MS/MS	By MS/MS	By MS/MS	By MS/MS	By MS/MS	1490900000	1590500000	974750000	1143800000	1371500000	1361800000	1784800000	1612100000
P48059	P48059	3	3	1	LIM and senescent cell antigen-like-containing domain protein 1	LIMS1	1	11.7	11.7	4.9	37.251	325	0.00032404	7.8752	By MS/MS	By matching	By MS/MS	By MS/MS	By matching		By MS/MS	By matching		33288000	64019000	45329000	10944000		46327000	33291000
P48147	P48147	28	28	28	Prolyl endopeptidase	PREP	1	51	51	51	80.699	710	0	101.23	By MS/MS	By MS/MS	By MS/MS	By MS/MS	By MS/MS	By MS/MS	By MS/MS	By MS/MS	676590000	855840000	486370000	6362500000	8005700000	6699100000	897520000	7427900000
P48163	P48163	7	7	7	NADP-dependent malic enzyme	ME1	1	17.3	17.3	17.3	64.149	572	0	33.375	By MS/MS	By MS/MS	By MS/MS	By MS/MS	By MS/MS	By MS/MS	By MS/MS	By MS/MS	206350000	197390000	209710000	164620000	119210000	184340000	132200000	211670000
P48200	P48200	3	3	3	Iron-responsive element-binding protein 2	IREB2	1	2.8	2.8	2.8	105.04	963	0.0055663	2.1715	By MS/MS				By MS/MS	By matching	By MS/MS	By MS/MS					496600000	43092000	612150000	495670000
P48382	P48382	3	3	3	DNA-binding protein RFX5	RFX5	1	5.2	5.2	5.2	65.322	616	0.00053433	3.6112	By matching	By MS/MS		By MS/MS	By matching	By MS/MS	By MS/MS	By matching	12158000	181670000		130890000	19519000	159960000	262770000	27801000
P48426;P78356	P48426	3;1	3;1	3;1	Phosphatidylinositol 5-phosphate 4-kinase type-2 alpha	PIP4K2A	2	8.1	8.1	8.1	46.224	406	0.00030562	6.3669	By MS/MS	By matching	By MS/MS	By MS/MS	By MS/MS	By MS/MS	By MS/MS	By MS/MS	45972000	18857000	51018000	10647000	7221600	61983000	29788000	16505000
P48444	P48444	28	28	28	Coatomer subunit delta	ARCN1	1	58.9	58.9	58.9	57.21	511	0	144.88	By MS/MS	By MS/MS	By MS/MS	By MS/MS	By MS/MS	By MS/MS	By MS/MS	By MS/MS	2747500000	3331900000	2755200000	2392400000	2662900000	2708200000	3127900000	2799500000
P48449	P48449	6	6	6	Lanosterol synthase	LSS	1	9	9	9	83.308	732	0.00030883	6.6305	By MS/MS	By MS/MS	By MS/MS	By MS/MS	By MS/MS	By MS/MS	By MS/MS	By MS/MS	692720000	832600000	584880000	515500000	532220000	407900000	630030000	562230000
P48506	P48506	4	4	4	Glutamate--cysteine ligase catalytic subunit	GCLC	1	7.5	7.5	7.5	72.765	637	0.0002736	4.0124	By MS/MS	By MS/MS	By MS/MS	By MS/MS	By MS/MS	By MS/MS	By MS/MS	By MS/MS	34426000	36855000	27204000	24018000	142470000	182340000	140910000	154010000
P48507	P48507	6	6	6	Glutamate--cysteine ligase regulatory subunit	GCLM	1	25.5	25.5	25.5	30.727	274	0	41.806	By MS/MS	By MS/MS	By MS/MS	By MS/MS	By MS/MS	By MS/MS	By MS/MS	By MS/MS	299500000	421690000	379270000	310660000	580030000	568580000	679870000	523000000
P48509	P48509	5	5	5	CD151 antigen	CD151	1	14.6	14.6	14.6	28.295	253	0	9.8677	By MS/MS	By MS/MS	By MS/MS	By MS/MS	By MS/MS	By MS/MS	By MS/MS	By MS/MS	340980000	421250000	258160000	304010000	217480000	105340000	97160000	128150000
P48556	P48556	11	11	11	26S proteasome non-ATPase regulatory subunit 8	PSMD8	1	34	34	34	39.611	350	0	49.956	By MS/MS	By MS/MS	By MS/MS	By MS/MS	By MS/MS	By MS/MS	By MS/MS	By MS/MS	954660000	1151200000	942470000	843020000	900210000	720140000	869150000	1016800000
P48634	P48634	13	12	12	Protein PRRC2A	PRRC2A	1	11.9	11.4	11.4	228.86	2157	0	43.723	By MS/MS	By MS/MS	By MS/MS	By MS/MS	By MS/MS	By MS/MS	By MS/MS	By MS/MS	159370000	288580000	231380000	204290000	179350000	149670000	229370000	192920000
P48637	P48637	21	21	21	Glutathione synthetase	GSS	1	50.8	50.8	50.8	52.384	474	0	58.573	By MS/MS	By MS/MS	By MS/MS	By MS/MS	By MS/MS	By MS/MS	By MS/MS	By MS/MS	1221400000	1383700000	963530000	1025800000	968040000	924950000	1024100000	925580000
P48643	P48643	43	43	43	T-complex protein 1 subunit epsilon	CCT5	1	84.7	84.7	84.7	59.67	541	0	323.31	By MS/MS	By MS/MS	By MS/MS	By MS/MS	By MS/MS	By MS/MS	By MS/MS	By MS/MS	17099000000	20497000000	15837000000	12866000000	13754000000	13541000000	17675000000	15801000000
P48651	P48651	3	3	3	Phosphatidylserine synthase 1	PTDSS1	1	8.9	8.9	8.9	55.527	473	0	9.4653	By MS/MS	By MS/MS	By MS/MS	By MS/MS	By MS/MS	By MS/MS	By MS/MS	By MS/MS	105560000	129480000	70804000	85476000	72149000	66717000	100640000	111430000
P48681	P48681	29	29	29	Nestin	NES	1	23.4	23.4	23.4	177.44	1621	0	213.55	By MS/MS	By MS/MS	By MS/MS	By MS/MS	By MS/MS	By MS/MS	By MS/MS	By MS/MS	1278200000	1529000000	876140000	868580000	705960000	913680000	698970000	833460000
P48723	P48723	2	2	2	Heat shock 70 kDa protein 13	HSPA13	1	5.7	5.7	5.7	51.927	471	0.0018013	2.9774	By MS/MS	By MS/MS	By matching	By MS/MS	By MS/MS	By matching	By matching	By matching	31507000	13947000	21943000	15862000	22876000	32260000	16866000	25343000
P48729;Q8N752	P48729	7;3	7;3	7;3	Casein kinase I isoform alpha	CSNK1A1	2	26.7	26.7	26.7	38.914	337	0	100.04	By MS/MS	By MS/MS	By MS/MS	By MS/MS	By MS/MS	By MS/MS	By MS/MS	By MS/MS	191720000	202860000	199370000	170950000	79581000	97753000	119130000	114660000
P48730;P49674	P48730;P49674	3;2	3;2	3;2	Casein kinase I isoform delta;Casein kinase I isoform epsilon	CSNK1D;CSNK1E	2	9.6	9.6	9.6	47.33	415	0.0018224	3.1507	By MS/MS	By matching	By MS/MS	By MS/MS	By matching	By matching			18695000	29881000	31647000	19983000	6952100	8741900
P48735	P48735	7	7	7	Isocitrate dehydrogenase [NADP], mitochondrial	IDH2	1	16.6	16.6	16.6	50.909	452	0	14.234	By MS/MS	By MS/MS	By MS/MS	By MS/MS	By MS/MS	By MS/MS	By MS/MS	By MS/MS	98593000	86905000	57251000	44081000	42371000	58939000	41085000	45702000
P48739	P48739	16	16	14	Phosphatidylinositol transfer protein beta isoform	PITPNB	1	63.8	63.8	57.6	31.54	271	0	50.206	By MS/MS	By MS/MS	By MS/MS	By MS/MS	By MS/MS	By MS/MS	By MS/MS	By MS/MS	530380000	612930000	506640000	419260000	509390000	422640000	536760000	694980000
P48960;Q9UHX3	P48960	13;2	13;2	13;2	CD97 antigen;CD97 antigen subunit alpha;CD97 antigen subunit beta	CD97	2	22.5	22.5	22.5	91.868	835	0	53.746	By MS/MS	By MS/MS	By MS/MS	By MS/MS	By MS/MS	By MS/MS	By MS/MS	By MS/MS	278770000	450510000	379650000	246110000	309870000	294740000	457680000	435010000
P49005	P49005	6	6	6	DNA polymerase delta subunit 2	POLD2	1	22.8	22.8	22.8	51.289	469	0	14.533	By MS/MS	By MS/MS	By MS/MS	By MS/MS	By MS/MS	By MS/MS	By MS/MS	By MS/MS	133950000	151710000	110400000	144240000	117290000	109080000	61708000	59385000
P49006	P49006	6	6	6	MARCKS-related protein	MARCKSL1	1	69.2	69.2	69.2	19.529	195	0	219.44	By MS/MS	By MS/MS	By MS/MS	By MS/MS	By MS/MS	By MS/MS	By MS/MS	By MS/MS	268740000	355600000	301670000	204860000	397560000	347170000	420330000	422380000
P49023	P49023	24	24	24	Paxillin	PXN	1	56.9	56.9	56.9	64.505	591	0	323.31	By MS/MS	By MS/MS	By MS/MS	By MS/MS	By MS/MS	By MS/MS	By MS/MS	By MS/MS	2022800000	2520000000	1664800000	1623800000	1338600000	1451800000	1544800000	1578800000
P49189	P49189	14	14	14	4-trimethylaminobutyraldehyde dehydrogenase	ALDH9A1	1	32.8	32.8	32.8	53.801	494	0	74.144	By MS/MS	By MS/MS	By MS/MS	By MS/MS	By MS/MS	By MS/MS	By MS/MS	By MS/MS	1384300000	1115200000	1226800000	673490000	1173900000	957170000	1211400000	1275900000
P49207	P49207	7	7	7	60S ribosomal protein L34	RPL34	1	37.6	37.6	37.6	13.293	117	0	17.058	By MS/MS	By MS/MS	By MS/MS	By MS/MS	By MS/MS	By MS/MS	By MS/MS	By MS/MS	5269500000	6013500000	4981200000	4190700000	5023800000	4530100000	5592100000	5189000000
P49247	P49247	3	3	3	Ribose-5-phosphate isomerase	RPIA	1	13.5	13.5	13.5	33.269	311	0.00031666	7.2462	By matching	By matching	By MS/MS	By MS/MS	By MS/MS	By MS/MS	By MS/MS	By matching	64085000	69926000	114090000	54024000	70878000	89951000	121480000	60812000
P49257	P49257	9	9	9	Protein ERGIC-53	LMAN1	1	29	29	29	57.548	510	0	41.849	By MS/MS	By MS/MS	By MS/MS	By MS/MS	By MS/MS	By MS/MS	By MS/MS	By MS/MS	656460000	609250000	469570000	307330000	392990000	359600000	528870000	563630000
P49321	P49321	37	37	37	Nuclear autoantigenic sperm protein	NASP	1	64.1	64.1	64.1	85.237	788	0	323.31	By MS/MS	By MS/MS	By MS/MS	By MS/MS	By MS/MS	By MS/MS	By MS/MS	By MS/MS	4179600000	5248600000	4334900000	3624500000	4415500000	4451100000	5069600000	4754000000
P49327	P49327	125	125	125	Fatty acid synthase;[Acyl-carrier-protein] S-acetyltransferase;[Acyl-carrier-protein] S-malonyltransferase;3-oxoacyl-[acyl-carrier-protein] synthase;3-oxoacyl-[acyl-carrier-protein] reductase;3-hydroxyacyl-[acyl-carrier-protein] dehydratase;Enoyl-[acyl-carrier-protein] reductase;Oleoyl-[acyl-carrier-protein] hydrolase	FASN	1	63.9	63.9	63.9	273.42	2511	0	323.31	By MS/MS	By MS/MS	By MS/MS	By MS/MS	By MS/MS	By MS/MS	By MS/MS	By MS/MS	31112000000	34444000000	27637000000	24485000000	16520000000	16569000000	22245000000	20227000000
P49354	P49354	2	2	2	Protein farnesyltransferase/geranylgeranyltransferase type-1 subunit alpha	FNTA	1	7.4	7.4	7.4	44.408	379	0.0002764	4.2039	By MS/MS	By MS/MS	By MS/MS	By MS/MS	By MS/MS	By matching	By MS/MS	By matching	40165000	47610000	20862000	40740000	37533000	38929000	47476000	23951000
P49366	P49366	13	13	13	Deoxyhypusine synthase	DHPS	1	55.3	55.3	55.3	40.97	369	0	88.725	By MS/MS	By MS/MS	By MS/MS	By MS/MS	By MS/MS	By MS/MS	By MS/MS	By MS/MS	581680000	550250000	335260000	402280000	255000000	345610000	496670000	483580000
P49368	P49368	39	39	39	T-complex protein 1 subunit gamma	CCT3	1	69.9	69.9	69.9	60.533	545	0	323.31	By MS/MS	By MS/MS	By MS/MS	By MS/MS	By MS/MS	By MS/MS	By MS/MS	By MS/MS	14544000000	16744000000	13012000000	10648000000	10860000000	11490000000	14723000000	12998000000
P49406	P49406	5	5	5	39S ribosomal protein L19, mitochondrial	MRPL19	1	22.6	22.6	22.6	33.535	292	0	12.294	By MS/MS	By MS/MS	By MS/MS	By MS/MS	By MS/MS	By MS/MS	By MS/MS	By MS/MS	82955000	131330000	82326000	69662000	58407000	76212000	116970000	101050000
P49411	P49411	34	34	34	Elongation factor Tu, mitochondrial	TUFM	1	73.7	73.7	73.7	49.541	452	0	323.31	By MS/MS	By MS/MS	By MS/MS	By MS/MS	By MS/MS	By MS/MS	By MS/MS	By MS/MS	11729000000	12841000000	10281000000	9377000000	11228000000	11411000000	13959000000	9874700000
P49419	P49419	14	14	14	Alpha-aminoadipic semialdehyde dehydrogenase	ALDH7A1	1	37.7	37.7	37.7	58.486	539	0	110.61	By MS/MS	By MS/MS	By MS/MS	By MS/MS	By MS/MS	By MS/MS	By MS/MS	By MS/MS	1126700000	1039500000	752390000	591200000	781390000	756530000	924250000	937170000
P49458	P49458	6	6	6	Signal recognition particle 9 kDa protein	SRP9	1	61.6	61.6	61.6	10.112	86	0	61.395	By MS/MS	By MS/MS	By MS/MS	By MS/MS	By MS/MS	By MS/MS	By MS/MS	By MS/MS	1957500000	1257100000	927490000	852850000	1027200000	818980000	830660000	1279100000
P49459	P49459	2	2	2	Ubiquitin-conjugating enzyme E2 A	UBE2A	1	17.8	17.8	17.8	17.315	152	0.00030404	6.2102	By MS/MS	By MS/MS	By MS/MS	By MS/MS	By MS/MS	By MS/MS	By MS/MS	By MS/MS	109060000	127170000	106630000	60971000	56806000	74945000	78234000	73992000
P49585;Q9Y5K3	P49585	6;2	6;2	6;2	Choline-phosphate cytidylyltransferase A	PCYT1A	2	26.2	26.2	26.2	41.731	367	0	12.45	By MS/MS	By MS/MS	By MS/MS	By MS/MS	By MS/MS	By MS/MS	By MS/MS	By MS/MS	61164000	67099000	10842000	28923000	67119000	43248000	70496000	95375000
P49588	P49588	52	52	52	Alanine--tRNA ligase, cytoplasmic	AARS	1	63.2	63.2	63.2	106.81	968	0	323.31	By MS/MS	By MS/MS	By MS/MS	By MS/MS	By MS/MS	By MS/MS	By MS/MS	By MS/MS	7550200000	8655800000	7436900000	6189100000	6359600000	5884800000	7073100000	7930500000
P49589	P49589	25	25	25	Cysteine--tRNA ligase, cytoplasmic	CARS	1	41.8	41.8	41.8	85.472	748	0	145.52	By MS/MS	By MS/MS	By MS/MS	By MS/MS	By MS/MS	By MS/MS	By MS/MS	By MS/MS	1108200000	1420800000	954720000	787180000	893900000	895360000	1124900000	1020000000
P49590	P49590	10	4	4	Probable histidine--tRNA ligase, mitochondrial	HARS2	1	19.8	8.3	8.3	56.888	506	0	9.902	By MS/MS	By MS/MS	By MS/MS	By MS/MS	By MS/MS	By MS/MS	By MS/MS	By MS/MS	94369000	121310000	70366000	77690000	53478000	80027000	54085000	88945000
P49591	P49591	24	24	24	Serine--tRNA ligase, cytoplasmic	SARS	1	64.4	64.4	64.4	58.777	514	0	196.85	By MS/MS	By MS/MS	By MS/MS	By MS/MS	By MS/MS	By MS/MS	By MS/MS	By MS/MS	1841000000	2177400000	2027000000	1730800000	1827900000	2044700000	2263900000	1997600000
P49593	P49593	12	12	12	Protein phosphatase 1F	PPM1F	1	40.1	40.1	40.1	49.83	454	0	61.405	By MS/MS	By MS/MS	By MS/MS	By MS/MS	By MS/MS	By MS/MS	By MS/MS	By MS/MS	502530000	541750000	472140000	459980000	580430000	559920000	451850000	496210000
P49642	P49642	5	5	5	DNA primase small subunit	PRIM1	1	17.4	17.4	17.4	49.901	420	0	25.496	By MS/MS	By MS/MS	By MS/MS	By MS/MS	By MS/MS	By MS/MS	By MS/MS	By MS/MS	132440000	126280000	100530000	75914000	20928000	26054000		73121000
P49643	P49643	4	4	4	DNA primase large subunit	PRIM2	1	10.2	10.2	10.2	58.805	509	0	9.1323	By MS/MS	By matching	By MS/MS	By MS/MS	By MS/MS	By matching	By matching	By matching	63222000	84252000	68735000	55497000	48658000	4602200	33902000	56608000
P49662;Q6UXS9;P51878	P49662	3;1;1	3;1;1	3;1;1	Caspase-4;Caspase-4 subunit 1;Caspase-4 subunit 2	CASP4	3	6.6	6.6	6.6	43.262	377	0.0002702	3.7953	By MS/MS		By MS/MS	By MS/MS	By MS/MS	By MS/MS	By MS/MS	By MS/MS	34665000		37953000	36278000	73326000	75453000	58645000	65222000
P49711;Q8NI51	P49711	12;3	12;3	12;3	Transcriptional repressor CTCF	CTCF	2	21.7	21.7	21.7	82.785	727	0	43.412	By MS/MS	By MS/MS	By MS/MS	By MS/MS	By MS/MS	By MS/MS	By MS/MS	By MS/MS	205440000	296960000	206050000	216070000	222740000	265130000	234370000	226310000
P49720	P49720	9	9	9	Proteasome subunit beta type-3	PSMB3	1	45.9	45.9	45.9	22.949	205	0	52.634	By MS/MS	By MS/MS	By MS/MS	By MS/MS	By MS/MS	By MS/MS	By MS/MS	By MS/MS	1219500000	1272400000	1008000000	649320000	1256400000	1390900000	1651900000	1591500000
P49721	P49721	15	15	15	Proteasome subunit beta type-2	PSMB2	1	67.7	67.7	67.7	22.836	201	0	45.446	By MS/MS	By MS/MS	By MS/MS	By MS/MS	By MS/MS	By MS/MS	By MS/MS	By MS/MS	1164200000	992100000	1135300000	746370000	1351700000	1168600000	1550400000	1598900000
P49736	P49736	31	31	31	DNA replication licensing factor MCM2	MCM2	1	43.7	43.7	43.7	101.89	904	0	264.95	By MS/MS	By MS/MS	By MS/MS	By MS/MS	By MS/MS	By MS/MS	By MS/MS	By MS/MS	2342500000	2684900000	2156000000	1769400000	1598900000	1762500000	1707300000	1895600000
P49748	P49748	32	32	32	Very long-chain specific acyl-CoA dehydrogenase, mitochondrial	ACADVL	1	59.1	59.1	59.1	70.389	655	0	286	By MS/MS	By MS/MS	By MS/MS	By MS/MS	By MS/MS	By MS/MS	By MS/MS	By MS/MS	2835100000	3094400000	2514800000	2113000000	2039700000	2097200000	2436900000	2213900000
P49750	P49750	8	8	8	YLP motif-containing protein 1	YLPM1	1	6	6	6	219.98	1951	0	33.14	By MS/MS	By MS/MS	By MS/MS	By MS/MS	By MS/MS	By MS/MS	By MS/MS	By MS/MS	97990000	198140000	152680000	212410000	163980000	214820000	204040000	158270000
P49755	P49755	9	9	9	Transmembrane emp24 domain-containing protein 10	TMED10	1	41.1	41.1	41.1	24.976	219	0	32.535	By MS/MS	By MS/MS	By MS/MS	By MS/MS	By MS/MS	By MS/MS	By MS/MS	By MS/MS	528030000	443990000	439800000	287680000	362890000	337610000	512900000	401330000
P49756	P49756	20	20	20	RNA-binding protein 25	RBM25	1	29.8	29.8	29.8	100.18	843	0	65.021	By MS/MS	By MS/MS	By MS/MS	By MS/MS	By MS/MS	By MS/MS	By MS/MS	By MS/MS	561090000	637740000	416710000	435050000	714650000	767480000	834880000	811260000
P49770	P49770	8	8	8	Translation initiation factor eIF-2B subunit beta	EIF2B2	1	29.3	29.3	29.3	38.989	351	0	24.461	By MS/MS	By MS/MS	By MS/MS	By MS/MS	By MS/MS	By MS/MS	By MS/MS	By MS/MS	379860000	382200000	330830000	311550000	243860000	246590000	301480000	319320000
P49773	P49773	11	11	11	Histidine triad nucleotide-binding protein 1	HINT1	1	79.4	79.4	79.4	13.802	126	0	129.49	By MS/MS	By MS/MS	By MS/MS	By MS/MS	By MS/MS	By MS/MS	By MS/MS	By MS/MS	5027600000	6088100000	5553700000	3904800000	3966100000	4491100000	5272300000	4892300000
P49790	P49790	21	21	21	Nuclear pore complex protein Nup153	NUP153	1	24.6	24.6	24.6	153.94	1475	0	97.109	By MS/MS	By MS/MS	By MS/MS	By MS/MS	By MS/MS	By MS/MS	By MS/MS	By MS/MS	430340000	644100000	378500000	368980000	361080000	303990000	440590000	416910000
P49792;A6NKT7;Q7Z3J3;Q99666;O14715;P0DJD0;P0DJD1	P49792	53;15;12;11;11;8;8	53;15;12;11;11;8;8	52;15;12;11;11;8;8	E3 SUMO-protein ligase RanBP2	RANBP2	7	23.9	23.9	23.7	358.2	3224	0	208.8	By MS/MS	By MS/MS	By MS/MS	By MS/MS	By MS/MS	By MS/MS	By MS/MS	By MS/MS	5940400000	4914600000	4282000000	5971300000	4156400000	6668300000	3036100000	3648800000
P49821	P49821	17	17	17	NADH dehydrogenase [ubiquinone] flavoprotein 1, mitochondrial	NDUFV1	1	51.7	51.7	51.7	50.817	464	0	75.453	By MS/MS	By MS/MS	By MS/MS	By MS/MS	By MS/MS	By MS/MS	By MS/MS	By MS/MS	332630000	439260000	374510000	321170000	395410000	447590000	408140000	440450000
P49840	P49840	3	3	3	Glycogen synthase kinase-3 alpha	GSK3A	1	8.3	8.3	8.3	50.98	483	0.0003199	7.5665	By MS/MS	By MS/MS	By MS/MS	By MS/MS	By MS/MS	By MS/MS	By MS/MS	By MS/MS	102840000	90169000	91341000	27987000	41207000	42912000	43805000	43116000
P49841	P49841	5	5	5	Glycogen synthase kinase-3 beta	GSK3B	1	25	25	25	46.744	420	0	40.799	By MS/MS	By MS/MS	By MS/MS	By MS/MS	By MS/MS	By MS/MS	By MS/MS	By MS/MS	107390000	190810000	138920000	122900000	101800000	52317000	123820000	83978000
P49902	P49902	6	6	6	Cytosolic purine 5-nucleotidase	NT5C2	1	16.9	16.9	16.9	64.969	561	0	15.069	By MS/MS	By MS/MS	By MS/MS	By MS/MS	By MS/MS	By MS/MS	By MS/MS	By MS/MS	140040000	106930000	86840000	136470000	117080000	98829000	134080000	68047000
P49903	P49903	5	5	5	Selenide, water dikinase 1	SEPHS1	1	19.4	19.4	19.4	42.91	392	0	18.927	By MS/MS	By MS/MS	By MS/MS	By MS/MS	By MS/MS	By MS/MS	By MS/MS	By MS/MS	139960000	156230000	119490000	106640000	85732000	107000000	95428000	69221000
P49914	P49914	2	2	2	5-formyltetrahydrofolate cyclo-ligase	MTHFS	1	10.3	10.3	10.3	23.255	203	0.0020487	2.8863		By MS/MS	By MS/MS	By MS/MS	By matching					48357000	18232000	33832000	17748000
P49915	P49915	35	35	35	GMP synthase [glutamine-hydrolyzing]	GMPS	1	63.5	63.5	63.5	76.715	693	0	323.31	By MS/MS	By MS/MS	By MS/MS	By MS/MS	By MS/MS	By MS/MS	By MS/MS	By MS/MS	4815600000	4850700000	3760000000	3498600000	3892100000	4011900000	5335300000	4471200000
P49916	P49916	10	10	10	DNA ligase 3	LIG3	1	14.5	14.5	14.5	112.91	1009	0	20.077	By MS/MS	By MS/MS	By MS/MS	By MS/MS	By MS/MS	By MS/MS	By MS/MS	By MS/MS	171000000	169190000	173300000	127490000	123390000	129580000	183070000	182180000
P49959	P49959	12	12	12	Double-strand break repair protein MRE11A	MRE11A	1	24.4	24.4	24.4	80.592	708	0	38.291	By MS/MS	By MS/MS	By MS/MS	By MS/MS	By MS/MS	By MS/MS	By MS/MS	By MS/MS	396450000	542280000	450130000	399030000	393020000	199040000	233670000	270630000
P50213	P50213	16	16	16	Isocitrate dehydrogenase [NAD] subunit alpha, mitochondrial	IDH3A	1	46.4	46.4	46.4	39.591	366	0	77.498	By MS/MS	By MS/MS	By MS/MS	By MS/MS	By MS/MS	By MS/MS	By MS/MS	By MS/MS	1306000000	1343900000	1146200000	1035900000	1266900000	1033800000	1507400000	1283500000
P50395	P50395	42	42	31	Rab GDP dissociation inhibitor beta	GDI2	1	82	82	66.5	50.663	445	0	323.31	By MS/MS	By MS/MS	By MS/MS	By MS/MS	By MS/MS	By MS/MS	By MS/MS	By MS/MS	8173000000	9498200000	7613200000	7572100000	9205700000	9221200000	10906000000	9954800000
P50402	P50402	10	10	10	Emerin	EMD	1	54.3	54.3	54.3	28.994	254	0	38.54	By MS/MS	By MS/MS	By MS/MS	By MS/MS	By MS/MS	By MS/MS	By MS/MS	By MS/MS	343140000	413250000	346150000	272800000	331440000	289010000	422970000	324100000
P50416	P50416	4	4	4	Carnitine O-palmitoyltransferase 1, liver isoform	CPT1A	1	6.7	6.7	6.7	88.367	773	0	10.22	By MS/MS	By MS/MS	By MS/MS	By MS/MS	By matching	By MS/MS	By matching	By MS/MS	58902000	35903000	30813000	28676000	11268000	11957000	27222000	20735000
P50443	P50443	4	4	4	Sulfate transporter	SLC26A2	1	8.8	8.8	8.8	81.661	739	0	14.235	By MS/MS	By MS/MS	By MS/MS	By MS/MS	By MS/MS	By matching	By matching	By MS/MS	59301000	64069000	47592000	56047000	7949900	21510000	19898000	21717000
P50452;P50453;O75830	P50452	7;2;1	5;1;0	5;1;0	Serpin B8	SERPINB8	3	21.1	16.3	16.3	42.766	374	0	18.681	By MS/MS	By MS/MS	By MS/MS	By MS/MS	By MS/MS	By MS/MS	By MS/MS	By MS/MS	77342000	73908000	73970000	33780000	107610000	104710000	97900000	105870000
P50454	P50454	22	22	22	Serpin H1	SERPINH1	1	61	61	61	46.44	418	0	242.19	By MS/MS	By MS/MS	By MS/MS	By MS/MS	By MS/MS	By MS/MS	By MS/MS	By MS/MS	3491500000	4129100000	3085900000	2656400000	2544400000	2751000000	3124000000	2969300000
P50479	P50479	8	8	8	PDZ and LIM domain protein 4	PDLIM4	1	33	33	33	35.398	330	0	20.288	By MS/MS	By MS/MS	By MS/MS	By MS/MS	By MS/MS	By MS/MS	By MS/MS	By MS/MS	357670000	442210000	305200000	286220000	228390000	186230000	273510000	308150000
P50502;Q8IZP2;Q8NFI4	P50502;Q8IZP2;Q8NFI4	13;9;7	13;9;7	13;9;7	Hsc70-interacting protein;Putative protein FAM10A4;Putative protein FAM10A5	ST13;ST13P4;ST13P5	3	32.2	32.2	32.2	41.331	369	0	123.23	By MS/MS	By MS/MS	By MS/MS	By MS/MS	By MS/MS	By MS/MS	By MS/MS	By MS/MS	2856000000	3320000000	2609800000	2168900000	2255300000	2378800000	2710000000	2711600000
P50552	P50552	13	13	13	Vasodilator-stimulated phosphoprotein	VASP	1	42.6	42.6	42.6	39.829	380	0	82.317	By MS/MS	By MS/MS	By MS/MS	By MS/MS	By MS/MS	By MS/MS	By MS/MS	By MS/MS	1035800000	1267000000	1044000000	882150000	888320000	559290000	915450000	876800000
P50570;Q9UQ16	P50570	36;8	36;8	29;4	Dynamin-2	DNM2	2	51.7	51.7	44.6	98.063	870	0	323.31	By MS/MS	By MS/MS	By MS/MS	By MS/MS	By MS/MS	By MS/MS	By MS/MS	By MS/MS	2023500000	2451300000	1932900000	1516200000	1596800000	1927200000	2058200000	1739000000
P50579	P50579	21	21	21	Methionine aminopeptidase 2	METAP2	1	65.9	65.9	65.9	52.891	478	0	323.31	By MS/MS	By MS/MS	By MS/MS	By MS/MS	By MS/MS	By MS/MS	By MS/MS	By MS/MS	1858700000	2141500000	1802900000	1654500000	1602700000	1706500000	1848900000	1742200000
P50583	P50583	5	5	5	Bis(5-nucleosyl)-tetraphosphatase [asymmetrical]	NUDT2	1	43.5	43.5	43.5	16.829	147	0	15.213	By MS/MS	By MS/MS	By MS/MS	By MS/MS	By MS/MS	By MS/MS	By MS/MS	By MS/MS	159100000	203650000	155640000	160080000	177350000	201540000	154980000	224300000
P50613	P50613	3	3	3	Cyclin-dependent kinase 7	CDK7	1	13	13	13	39.038	346	0.00029189	5.4086	By MS/MS	By MS/MS	By MS/MS	By MS/MS	By matching	By MS/MS	By matching	By MS/MS	63839000	136760000	145400000	132840000	67274000	21983000	29551000	20011000
P50748	P50748	4	4	4	Kinetochore-associated protein 1	KNTC1	1	2.4	2.4	2.4	250.75	2209	0.00029603	5.7234	By MS/MS	By MS/MS	By MS/MS	By MS/MS	By matching	By matching		By matching	12640000	47735000		34106000	7917300	11023000		10151000
P50750;Q96Q40;O94921;Q07002;Q00536;Q00537	P50750	9;1;1;1;1;1	8;0;0;0;0;0	8;0;0;0;0;0	Cyclin-dependent kinase 9	CDK9	6	28.8	26.6	26.6	42.777	372	0	19.996	By MS/MS	By MS/MS	By MS/MS	By MS/MS	By MS/MS	By MS/MS	By MS/MS	By MS/MS	203490000	173730000	154430000	76051000	102180000	100560000	97679000	108190000
P50897	P50897	7	7	7	Palmitoyl-protein thioesterase 1	PPT1	1	33	33	33	34.193	306	0	47.583	By MS/MS	By MS/MS	By MS/MS	By MS/MS	By MS/MS	By MS/MS	By MS/MS	By MS/MS	92785000	156150000	105660000	75445000	50384000	51120000	55460000	101390000
P50914	P50914	9	9	9	60S ribosomal protein L14	RPL14	1	42.8	42.8	42.8	23.432	215	0	53.964	By MS/MS	By MS/MS	By MS/MS	By MS/MS	By MS/MS	By MS/MS	By MS/MS	By MS/MS	8584200000	8674000000	6754300000	6860400000	7073900000	8085800000	8458100000	7224100000
P50990	P50990	48	48	48	T-complex protein 1 subunit theta	CCT8	1	82.7	82.7	82.7	59.62	548	0	323.31	By MS/MS	By MS/MS	By MS/MS	By MS/MS	By MS/MS	By MS/MS	By MS/MS	By MS/MS	14081000000	17533000000	13897000000	11745000000	13867000000	13395000000	14832000000	14834000000
P50991	P50991	32	32	32	T-complex protein 1 subunit delta	CCT4	1	66.6	66.6	66.6	57.924	539	0	323.31	By MS/MS	By MS/MS	By MS/MS	By MS/MS	By MS/MS	By MS/MS	By MS/MS	By MS/MS	17330000000	18395000000	15961000000	13824000000	14192000000	14551000000	18385000000	17010000000
P50995	P50995	18	18	18	Annexin A11	ANXA11	1	35.4	35.4	35.4	54.389	505	0	74.512	By MS/MS	By MS/MS	By MS/MS	By MS/MS	By MS/MS	By MS/MS	By MS/MS	By MS/MS	1490200000	1693900000	1415900000	1285400000	1187000000	1254300000	1444600000	1206100000
P51003;Q9NRJ5;Q9BWT3	P51003;Q9NRJ5	6;3;1	6;3;1	6;3;1	Poly(A) polymerase alpha;Poly(A) polymerase beta	PAPOLA;PAPOLB	3	11.1	11.1	11.1	82.842	745	0	9.1649	By MS/MS	By MS/MS	By MS/MS	By MS/MS	By MS/MS	By MS/MS	By MS/MS	By MS/MS	52575000	77586000	71212000	63293000	30356000	67812000	24803000	49894000
P51114	P51114	20	20	18	Fragile X mental retardation syndrome-related protein 1	FXR1	1	40.1	40.1	37.5	69.72	621	0	104.56	By MS/MS	By MS/MS	By MS/MS	By MS/MS	By MS/MS	By MS/MS	By MS/MS	By MS/MS	994750000	1062200000	841410000	874950000	806570000	603400000	876750000	763980000
P51116	P51116	15	13	13	Fragile X mental retardation syndrome-related protein 2	FXR2	1	33.4	31.1	31.1	74.222	673	0	91.181	By MS/MS	By MS/MS	By MS/MS	By MS/MS	By MS/MS	By MS/MS	By MS/MS	By MS/MS	410100000	401180000	286040000	324150000	341350000	397310000	551710000	356200000
P51148	P51148	10	10	7	Ras-related protein Rab-5C	RAB5C	1	71.8	71.8	56.9	23.482	216	0	93.24	By MS/MS	By MS/MS	By MS/MS	By MS/MS	By MS/MS	By MS/MS	By MS/MS	By MS/MS	1934000000	2173600000	2028600000	1428900000	1574900000	1353000000	1684700000	2046000000
P51149	P51149	17	17	17	Ras-related protein Rab-7a	RAB7A	1	80.7	80.7	80.7	23.489	207	0	272.69	By MS/MS	By MS/MS	By MS/MS	By MS/MS	By MS/MS	By MS/MS	By MS/MS	By MS/MS	4096600000	4645400000	3760300000	3164800000	2956900000	2764100000	3218700000	3717300000
P51153	P51153	6	4	4	Ras-related protein Rab-13	RAB13	1	34.5	25.6	25.6	22.774	203	0	17.137	By MS/MS	By MS/MS	By MS/MS	By MS/MS	By MS/MS	By MS/MS	By MS/MS	By MS/MS	166540000	163220000	164200000	134890000	145670000	132470000	124580000	164130000
P51398	P51398	11	11	11	28S ribosomal protein S29, mitochondrial	DAP3	1	37.7	37.7	37.7	45.566	398	0	27.958	By MS/MS	By MS/MS	By MS/MS	By MS/MS	By MS/MS	By MS/MS	By MS/MS	By MS/MS	355990000	362910000	243420000	260850000	226600000	220700000	327980000	220830000
P51452	P51452	4	4	4	Dual specificity protein phosphatase 3	DUSP3	1	28.6	28.6	28.6	20.478	185	0	11.341	By MS/MS	By MS/MS	By MS/MS	By MS/MS	By MS/MS	By MS/MS	By MS/MS	By MS/MS	119340000	112520000	104040000	70097000	64299000	63919000	73770000	85245000
P51531	P51531	16	3	3	Probable global transcription activator SNF2L2	SMARCA2	1	10.9	2.6	2.6	181.28	1590	0.00027972	4.442	By MS/MS	By MS/MS	By MS/MS	By MS/MS	By MS/MS	By MS/MS	By MS/MS	By MS/MS	70318000	79220000	41165000	62112000	46856000	31807000	41903000	40695000
P51532;Q6ZRS2	P51532	29;1	29;1	16;0	Transcription activator BRG1	SMARCA4	2	19.6	19.6	12.1	184.64	1647	0	87.099	By MS/MS	By MS/MS	By MS/MS	By MS/MS	By MS/MS	By MS/MS	By MS/MS	By MS/MS	825330000	996740000	1373800000	675070000	586190000	507940000	576910000	1037200000
P51553	P51553	9	9	9	Isocitrate dehydrogenase [NAD] subunit gamma, mitochondrial	IDH3G	1	39.9	39.9	39.9	42.794	393	0	109.79	By MS/MS	By MS/MS	By MS/MS	By MS/MS	By MS/MS	By MS/MS	By MS/MS	By MS/MS	332940000	521370000	372260000	347310000	414370000	343370000	402190000	289570000
P51570	P51570	6	6	6	Galactokinase	GALK1	1	17.6	17.6	17.6	42.272	392	0	9.872	By MS/MS	By MS/MS	By MS/MS	By MS/MS	By matching	By MS/MS	By MS/MS	By MS/MS	156950000	155350000	124650000	109700000	85042000	31686000	105490000	57960000
P51571	P51571	5	5	5	Translocon-associated protein subunit delta	SSR4	1	36.4	36.4	36.4	18.998	173	0	28.777	By MS/MS	By MS/MS	By MS/MS	By MS/MS	By MS/MS	By MS/MS	By MS/MS	By MS/MS	720760000	942820000	504020000	602980000	495300000	456970000	794000000	799670000
P51572	P51572	17	17	17	B-cell receptor-associated protein 31	BCAP31	1	50	50	50	27.991	246	0	75.213	By MS/MS	By MS/MS	By MS/MS	By MS/MS	By MS/MS	By MS/MS	By MS/MS	By MS/MS	3650500000	3944900000	3056000000	2536300000	2712100000	2433700000	2935000000	2945400000
P51610;Q9Y5Z7	P51610	27;1	27;1	27;1	Host cell factor 1;HCF N-terminal chain 1;HCF N-terminal chain 2;HCF N-terminal chain 3;HCF N-terminal chain 4;HCF N-terminal chain 5;HCF N-terminal chain 6;HCF C-terminal chain 1;HCF C-terminal chain 2;HCF C-terminal chain 3;HCF C-terminal chain 4;HCF C-terminal chain 5;HCF C-terminal chain 6	HCFC1	2	21.1	21.1	21.1	208.73	2035	0	115.62	By MS/MS	By MS/MS	By MS/MS	By MS/MS	By MS/MS	By MS/MS	By MS/MS	By MS/MS	2542600000	2767500000	2046300000	1867300000	1896200000	1917900000	2023200000	2036600000
P51648;P48448;P30838;P43353	P51648	12;1;1;1	12;1;1;1	12;1;1;1	Fatty aldehyde dehydrogenase	ALDH3A2	4	32.4	32.4	32.4	54.847	485	0	24.391	By MS/MS	By MS/MS	By MS/MS	By MS/MS	By MS/MS	By MS/MS	By MS/MS	By MS/MS	361410000	333580000	276630000	247590000	226240000	229120000	344470000	349820000
P51659	P51659	33	33	33	Peroxisomal multifunctional enzyme type 2;(3R)-hydroxyacyl-CoA dehydrogenase;Enoyl-CoA hydratase 2	HSD17B4	1	58.3	58.3	58.3	79.685	736	0	224.77	By MS/MS	By MS/MS	By MS/MS	By MS/MS	By MS/MS	By MS/MS	By MS/MS	By MS/MS	1766500000	1998900000	1705200000	1482900000	1330000000	1491400000	1560700000	1508500000
P51665	P51665	14	14	14	26S proteasome non-ATPase regulatory subunit 7	PSMD7	1	52.5	52.5	52.5	37.025	324	0	214.32	By MS/MS	By MS/MS	By MS/MS	By MS/MS	By MS/MS	By MS/MS	By MS/MS	By MS/MS	2608600000	2895300000	2810000000	2271600000	2174400000	2203500000	2564300000	2034700000
P51784	P51784	9	8	7	Ubiquitin carboxyl-terminal hydrolase 11	USP11	1	14.1	13.2	11.7	109.82	963	0	31.712	By MS/MS	By MS/MS	By MS/MS	By MS/MS	By MS/MS	By MS/MS	By MS/MS	By MS/MS	61877000	234790000	116980000	114560000	54387000	62924000	61825000	41591000
P51808	P51808	3	3	3	Dynein light chain Tctex-type 3	DYNLT3	1	44	44	44	13.062	116	0.00027586	4.163	By MS/MS	By MS/MS	By MS/MS	By MS/MS	By MS/MS	By matching		By matching	31252000	42789000	54680000	54735000	14318000	14575000		19688000
P51809	P51809	4	4	4	Vesicle-associated membrane protein 7	VAMP7	1	17.3	17.3	17.3	24.935	220	0	8.9291	By MS/MS	By MS/MS	By MS/MS	By MS/MS	By MS/MS	By MS/MS	By MS/MS	By MS/MS	31743000	36822000	42405000	26706000	46430000	20328000		30234000
P51812	P51812	15	15	9	Ribosomal protein S6 kinase alpha-3	RPS6KA3	1	23.9	23.9	15.3	83.735	740	0	34.996	By MS/MS	By MS/MS	By MS/MS	By MS/MS	By MS/MS	By MS/MS	By MS/MS	By MS/MS	627410000	673880000	519680000	415850000	394230000	276520000	373170000	456830000
P51857	P51857	2	2	2	3-oxo-5-beta-steroid 4-dehydrogenase	AKR1D1	1	3.1	3.1	3.1	37.376	326	0.0046387	2.2809	By MS/MS	By matching	By matching	By MS/MS	By MS/MS	By MS/MS	By MS/MS	By MS/MS	89225000	120940000	127000000	90294000	68381000	45441000	65100000	63173000
P51858	P51858	22	20	20	Hepatoma-derived growth factor	HDGF	1	85.8	81.7	81.7	26.788	240	0	323.31	By MS/MS	By MS/MS	By MS/MS	By MS/MS	By MS/MS	By MS/MS	By MS/MS	By MS/MS	5136000000	6186200000	5077100000	4465700000	4528200000	5060100000	4977800000	5201600000
P51946	P51946	3	3	3	Cyclin-H	CCNH	1	15.2	15.2	15.2	37.643	323	0	9.7043	By MS/MS	By MS/MS	By MS/MS	By MS/MS	By MS/MS	By MS/MS		By MS/MS	47578000	118510000	76675000	58036000	15742000			9497900
P51948	P51948	3	3	3	CDK-activating kinase assembly factor MAT1	MNAT1	1	14.2	14.2	14.2	35.823	309	0.0002809	4.5462	By MS/MS	By MS/MS	By MS/MS	By MS/MS	By MS/MS	By MS/MS	By MS/MS	By MS/MS	25327000	150690000	129300000	101460000	63820000	65488000	12452000	21150000
P51965	P51965	4	4	2	Ubiquitin-conjugating enzyme E2 E1	UBE2E1	1	36.3	36.3	21.2	21.404	193	0	16.168	By MS/MS	By MS/MS	By MS/MS	By MS/MS	By MS/MS	By MS/MS	By matching	By MS/MS	134670000	187310000	129880000	110750000	65947000	59742000	60055000	77514000
P51970	P51970	9	9	9	NADH dehydrogenase [ubiquinone] 1 alpha subcomplex subunit 8	NDUFA8	1	69.2	69.2	69.2	20.105	172	0	53.819	By MS/MS	By MS/MS	By MS/MS	By MS/MS	By MS/MS	By MS/MS	By MS/MS	By MS/MS	671620000	688430000	642100000	534670000	502760000	516860000	611190000	635080000
P51991	P51991	24	22	22	Heterogeneous nuclear ribonucleoprotein A3	HNRNPA3	1	56.1	54.2	54.2	39.594	378	0	323.31	By MS/MS	By MS/MS	By MS/MS	By MS/MS	By MS/MS	By MS/MS	By MS/MS	By MS/MS	4970400000	5588700000	4215700000	3570700000	4505300000	4604000000	5100300000	4295100000
P52209	P52209	24	24	24	6-phosphogluconate dehydrogenase, decarboxylating	PGD	1	53.4	53.4	53.4	53.139	483	0	182.03	By MS/MS	By MS/MS	By MS/MS	By MS/MS	By MS/MS	By MS/MS	By MS/MS	By MS/MS	3190000000	3948900000	3101800000	2775100000	2801800000	3014800000	3636200000	3612900000
P52272	P52272	57	57	57	Heterogeneous nuclear ribonucleoprotein M	HNRNPM	1	76.2	76.2	76.2	77.515	730	0	323.31	By MS/MS	By MS/MS	By MS/MS	By MS/MS	By MS/MS	By MS/MS	By MS/MS	By MS/MS	18101000000	20216000000	15805000000	12048000000	14737000000	13202000000	17700000000	16940000000
P52292	P52292	17	17	17	Importin subunit alpha-1	KPNA2	1	54.6	54.6	54.6	57.861	529	0	224.63	By MS/MS	By MS/MS	By MS/MS	By MS/MS	By MS/MS	By MS/MS	By MS/MS	By MS/MS	2003100000	2380900000	1859600000	1733300000	673100000	756180000	1219500000	771140000
P52294	P52294	12	9	9	Importin subunit alpha-5;Importin subunit alpha-5, N-terminally processed	KPNA1	1	32.2	26.2	26.2	60.221	538	0	41.064	By MS/MS	By MS/MS	By MS/MS	By MS/MS	By MS/MS	By MS/MS	By MS/MS	By MS/MS	498440000	299940000	225050000	208350000	193840000	165930000	478680000	246650000
P52298	P52298	4	4	4	Nuclear cap-binding protein subunit 2	NCBP2	1	34.6	34.6	34.6	18.001	156	0.00033234	8.7489	By MS/MS	By MS/MS	By MS/MS	By MS/MS	By MS/MS	By MS/MS	By MS/MS	By MS/MS	141930000	99623000	119310000	113310000	124050000	21569000	172030000	71574000
P52306	P52306	11	11	11	Rap1 GTPase-GDP dissociation stimulator 1	RAP1GDS1	1	23.1	23.1	23.1	66.316	607	0	28.091	By MS/MS	By MS/MS	By MS/MS	By MS/MS	By MS/MS	By MS/MS	By MS/MS	By MS/MS	302390000	415840000	329470000	255700000	305630000	191420000	242980000	167170000
P52434	P52434	7	7	7	DNA-directed RNA polymerases I, II, and III subunit RPABC3	POLR2H	1	59.3	59.3	59.3	17.143	150	0	113.68	By MS/MS	By MS/MS	By MS/MS	By MS/MS	By MS/MS	By MS/MS	By MS/MS	By MS/MS	583350000	628570000	455530000	551280000	402870000	405510000	367530000	387760000
P52435;Q9H1A7;Q9GZM3	P52435;Q9H1A7;Q9GZM3	4;3;3	4;3;3	4;3;3	DNA-directed RNA polymerase II subunit RPB11-a;DNA-directed RNA polymerase II subunit RPB11-b2;DNA-directed RNA polymerase II subunit RPB11-b1	POLR2J;POLR2J3;POLR2J2	3	52.1	52.1	52.1	13.293	117	0.00030184	6.091	By MS/MS	By MS/MS	By matching	By MS/MS	By matching	By matching	By MS/MS	By matching	55922000	153340000	127810000	139840000	118230000	147750000	145760000	103320000
P52565	P52565	12	12	12	Rho GDP-dissociation inhibitor 1	ARHGDIA	1	78.9	78.9	78.9	23.207	204	0	215.31	By MS/MS	By MS/MS	By MS/MS	By MS/MS	By MS/MS	By MS/MS	By MS/MS	By MS/MS	6891900000	7776900000	5422800000	5370900000	4517600000	5610400000	5862000000	5703800000
P52566	P52566	3	3	3	Rho GDP-dissociation inhibitor 2	ARHGDIB	1	31.8	31.8	31.8	22.988	201	0.00032808	8.2747	By MS/MS	By MS/MS	By matching	By MS/MS	By MS/MS	By MS/MS	By MS/MS	By MS/MS	92080000	115600000	108280000	25668000	69204000	82885000	31363000	68198000
P52594	P52594	5	5	5	Arf-GAP domain and FG repeat-containing protein 1	AGFG1	1	18.3	18.3	18.3	58.259	562	0	45.866	By MS/MS	By MS/MS	By MS/MS	By MS/MS	By MS/MS	By MS/MS	By MS/MS	By MS/MS	87784000	107150000	72707000	74228000	64708000	148720000	182580000	140990000
P52597	P52597	15	13	13	Heterogeneous nuclear ribonucleoprotein F;Heterogeneous nuclear ribonucleoprotein F, N-terminally processed	HNRNPF	1	57.8	51.3	51.3	45.671	415	0	323.31	By MS/MS	By MS/MS	By MS/MS	By MS/MS	By MS/MS	By MS/MS	By MS/MS	By MS/MS	3648600000	5313400000	4093600000	3803300000	4628000000	4189000000	5221400000	3981200000
P52630	P52630	5	5	5	Signal transducer and activator of transcription 2	STAT2	1	7.1	7.1	7.1	97.915	851	0	10.815	By matching	By matching	By matching	By matching	By MS/MS	By MS/MS	By MS/MS	By MS/MS	30492000	16146000	33955000	14385000	91396000	98974000	115380000	110960000
P52655	P52655	2	2	2	Transcription initiation factor IIA subunit 1;Transcription initiation factor IIA alpha chain;Transcription initiation factor IIA beta chain	GTF2A1	1	5.9	5.9	5.9	41.513	376	0.0002978	5.851	By MS/MS	By MS/MS	By MS/MS	By MS/MS	By MS/MS	By MS/MS	By matching	By MS/MS	30071000	40601000	30003000	22744000	22847000	21102000	39249000	24222000
P52701	P52701	32	32	32	DNA mismatch repair protein Msh6	MSH6	1	36.8	36.8	36.8	152.78	1360	0	182.18	By MS/MS	By MS/MS	By MS/MS	By MS/MS	By MS/MS	By MS/MS	By MS/MS	By MS/MS	1531200000	1757700000	1265300000	1101400000	977980000	1004500000	1214800000	1164500000
P52732	P52732	10	10	10	Kinesin-like protein KIF11	KIF11	1	13.1	13.1	13.1	119.16	1056	0	28.976	By MS/MS	By MS/MS	By MS/MS	By MS/MS	By MS/MS	By MS/MS	By MS/MS	By MS/MS	126570000	186660000	236270000	165510000	64186000	67094000	76239000	63935000
P52758	P52758	2	2	2	Ribonuclease UK114	HRSP12	1	19.7	19.7	19.7	14.494	137	0.00026998	3.7684	By MS/MS	By MS/MS	By MS/MS	By matching	By MS/MS	By matching	By MS/MS	By MS/MS	75763000	33362000	18011000	22415000	25510000	24191000	71025000	54958000
P52788	P52788	19	19	19	Spermine synthase	SMS	1	62.8	62.8	62.8	41.268	366	0	239.96	By MS/MS	By MS/MS	By MS/MS	By MS/MS	By MS/MS	By MS/MS	By MS/MS	By MS/MS	1765000000	1970000000	1392300000	1063500000	1331400000	1078500000	2277400000	1679600000
P52789;P52790	P52789	35;2	35;2	31;0	Hexokinase-2	HK2	2	46.7	46.7	43.4	102.38	917	0	152.83	By MS/MS	By MS/MS	By MS/MS	By MS/MS	By MS/MS	By MS/MS	By MS/MS	By MS/MS	1138200000	1543200000	1129900000	1096100000	1145300000	1025600000	1140800000	1504100000
P52815	P52815	7	7	7	39S ribosomal protein L12, mitochondrial	MRPL12	1	46.5	46.5	46.5	21.348	198	0	39.663	By MS/MS	By MS/MS	By MS/MS	By MS/MS	By MS/MS	By MS/MS	By MS/MS	By MS/MS	922350000	1292400000	936550000	701680000	679910000	1072500000	824730000	776570000
P52888	P52888	15	15	15	Thimet oligopeptidase	THOP1	1	27	27	27	78.839	689	0	28.042	By MS/MS	By MS/MS	By MS/MS	By MS/MS	By MS/MS	By MS/MS	By MS/MS	By MS/MS	585030000	676680000	530480000	331950000	413880000	377980000	509920000	477750000
P52895	P52895	12	8	4	Aldo-keto reductase family 1 member C2	AKR1C2	1	42.1	34.7	20.4	36.735	323	0	23.679	By MS/MS	By MS/MS	By MS/MS	By MS/MS	By MS/MS	By MS/MS	By MS/MS	By MS/MS	644190000	730470000	598330000	522200000	377100000	351580000	471430000	429870000
P52907	P52907	16	16	14	F-actin-capping protein subunit alpha-1	CAPZA1	1	69.6	69.6	66.1	32.922	286	0	323.31	By MS/MS	By MS/MS	By MS/MS	By MS/MS	By MS/MS	By MS/MS	By MS/MS	By MS/MS	2688200000	3435900000	2798700000	2400800000	2421400000	2519000000	2840500000	2944300000
P52926	P52926	4	4	4	High mobility group protein HMGI-C	HMGA2	1	41.3	41.3	41.3	11.832	109	0	156.04	By MS/MS	By MS/MS	By MS/MS	By MS/MS	By MS/MS	By MS/MS	By MS/MS	By MS/MS	1235700000	1297800000	1383500000	1269300000	1104400000	1126700000	1472000000	1354300000
P52943	P52943	5	5	5	Cysteine-rich protein 2	CRIP2	1	59.1	59.1	59.1	22.492	208	0	131.72	By MS/MS	By MS/MS	By MS/MS	By MS/MS	By MS/MS	By MS/MS	By MS/MS	By MS/MS	585200000	631530000	479560000	455210000	322820000	358640000	418340000	443170000
P52948	P52948	21	21	21	Nuclear pore complex protein Nup98-Nup96;Nuclear pore complex protein Nup98;Nuclear pore complex protein Nup96	NUP98	1	15.2	15.2	15.2	197.58	1817	0	41.881	By MS/MS	By MS/MS	By MS/MS	By MS/MS	By MS/MS	By MS/MS	By MS/MS	By MS/MS	346080000	873880000	475890000	430170000	452710000	471800000	504530000	514210000
P53004	P53004	9	9	9	Biliverdin reductase A	BLVRA	1	40.5	40.5	40.5	33.428	296	0	44.729	By MS/MS	By MS/MS	By MS/MS	By MS/MS	By MS/MS	By MS/MS	By MS/MS	By MS/MS	430190000	573610000	424140000	328200000	545560000	567600000	523210000	547830000
P53007	P53007	4	4	4	Tricarboxylate transport protein, mitochondrial	SLC25A1	1	14.1	14.1	14.1	34.012	311	0	27.074	By MS/MS	By MS/MS	By MS/MS	By MS/MS	By MS/MS	By MS/MS	By MS/MS	By MS/MS	219360000	259010000	196470000	157190000	149100000	94171000	148870000	158070000
P53041;E7EU14	P53041	20;1	20;1	20;1	Serine/threonine-protein phosphatase 5	PPP5C	2	48.1	48.1	48.1	56.878	499	0	147.89	By MS/MS	By MS/MS	By MS/MS	By MS/MS	By MS/MS	By MS/MS	By MS/MS	By MS/MS	1030500000	1001300000	916110000	624280000	780270000	873640000	676290000	830200000
P53350	P53350	4	4	4	Serine/threonine-protein kinase PLK1	PLK1	1	10.4	10.4	10.4	68.254	603	0	14.14	By MS/MS	By MS/MS	By MS/MS	By MS/MS					19459000	56857000	21030000	23454000
P53365	P53365	5	5	5	Arfaptin-2	ARFIP2	1	17.9	17.9	17.9	37.855	341	0	27.705	By MS/MS	By MS/MS	By MS/MS	By MS/MS	By MS/MS	By MS/MS	By MS/MS	By MS/MS	130130000	85703000	108840000	90090000	51348000	44939000	81581000	109430000
P53367	P53367	6	6	6	Arfaptin-1	ARFIP1	1	26.3	26.3	26.3	41.738	373	0	23.184	By MS/MS	By MS/MS	By MS/MS	By MS/MS	By MS/MS	By MS/MS	By MS/MS	By MS/MS	144430000	78432000	69601000	23018000	44189000	24437000	97259000	65107000
P53384	P53384	7	7	7	Cytosolic Fe-S cluster assembly factor NUBP1	NUBP1	1	32.2	32.2	32.2	34.534	320	0	35.593	By MS/MS	By MS/MS	By MS/MS	By MS/MS	By MS/MS	By MS/MS	By MS/MS	By MS/MS	314040000	283450000	311890000	281520000	271250000	342370000	477690000	330430000
P53396	P53396	50	50	50	ATP-citrate synthase	ACLY	1	56.9	56.9	56.9	120.84	1101	0	323.31	By MS/MS	By MS/MS	By MS/MS	By MS/MS	By MS/MS	By MS/MS	By MS/MS	By MS/MS	6598200000	6991700000	5879900000	5074400000	4225400000	4506800000	4743500000	5023100000
P53582	P53582	12	12	12	Methionine aminopeptidase 1	METAP1	1	42.7	42.7	42.7	43.215	386	0	72.427	By MS/MS	By MS/MS	By MS/MS	By MS/MS	By MS/MS	By MS/MS	By MS/MS	By MS/MS	572110000	579980000	511950000	501540000	340100000	483010000	739040000	538280000
P53597	P53597	7	7	7	Succinyl-CoA ligase [ADP/GDP-forming] subunit alpha, mitochondrial	SUCLG1	1	22.5	22.5	22.5	36.249	346	0	66.499	By MS/MS	By MS/MS	By MS/MS	By MS/MS	By MS/MS	By MS/MS	By MS/MS	By MS/MS	646430000	606870000	535070000	446420000	535990000	413530000	538990000	524400000
P53611	P53611	5	5	5	Geranylgeranyl transferase type-2 subunit beta	RABGGTB	1	16.9	16.9	16.9	36.924	331	0	17.849	By MS/MS	By MS/MS	By MS/MS	By MS/MS	By MS/MS	By MS/MS	By MS/MS	By MS/MS	245820000	264610000	206810000	153020000	160690000	144240000	134090000	165770000
P53618	P53618	40	40	40	Coatomer subunit beta	COPB1	1	49.3	49.3	49.3	107.14	953	0	276.91	By MS/MS	By MS/MS	By MS/MS	By MS/MS	By MS/MS	By MS/MS	By MS/MS	By MS/MS	3581600000	4284500000	3272600000	2738400000	4287600000	4277500000	4078700000	3342100000
P53621	P53621	60	60	60	Coatomer subunit alpha;Xenin;Proxenin	COPA	1	63.3	63.3	63.3	138.34	1224	0	323.31	By MS/MS	By MS/MS	By MS/MS	By MS/MS	By MS/MS	By MS/MS	By MS/MS	By MS/MS	5285500000	6052400000	5854500000	4400900000	4305400000	4271300000	4839100000	4893600000
P53634	P53634	11	11	11	Dipeptidyl peptidase 1;Dipeptidyl peptidase 1 exclusion domain chain;Dipeptidyl peptidase 1 heavy chain;Dipeptidyl peptidase 1 light chain	CTSC	1	29.2	29.2	29.2	51.853	463	0	169.08	By MS/MS	By MS/MS	By MS/MS	By MS/MS	By MS/MS	By MS/MS	By MS/MS	By MS/MS	817400000	812110000	558370000	526860000	893570000	865690000	1168500000	775180000
P53675	P53675	23	1	1	Clathrin heavy chain 2	CLTCL1	1	12.4	0.7	0.7	187.03	1640	0.0020518	2.9131	By matching	By MS/MS	By matching	By MS/MS	By MS/MS	By matching	By matching	By matching		58567000	39208000	21888000	25612000
P53680	P53680	2	2	2	AP-2 complex subunit sigma	AP2S1	1	10.6	10.6	10.6	17.018	142	0.0055758	2.1963	By MS/MS	By MS/MS	By MS/MS	By MS/MS	By MS/MS	By MS/MS	By MS/MS	By MS/MS	111810000	87546000	122520000	90449000	87273000	95584000	92058000	95627000
P53701	P53701	4	4	4	Cytochrome c-type heme lyase	HCCS	1	16.8	16.8	16.8	30.601	268	0	33.22	By MS/MS	By MS/MS	By MS/MS	By MS/MS	By MS/MS	By MS/MS	By MS/MS	By MS/MS	96632000	115860000	72051000	86042000	54275000	63263000	41356000	34447000
P53794	P53794	2	2	2	Sodium/myo-inositol cotransporter	SLC5A3	1	4.3	4.3	4.3	79.693	718	0.00030441	6.25	By MS/MS	By MS/MS	By MS/MS		By matching	By MS/MS	By MS/MS	By matching	44768000	53901000	34628000		8843400	6351500	26740000	20957000
P53985	P53985	5	5	5	Monocarboxylate transporter 1	SLC16A1	1	11.2	11.2	11.2	53.944	500	0	45.753	By MS/MS	By MS/MS	By MS/MS	By MS/MS	By MS/MS	By MS/MS	By MS/MS	By MS/MS	369440000	302910000	155900000	105420000	169430000	136290000	206540000	199950000
P53990	P53990	6	6	6	IST1 homolog	IST1	1	14	14	14	39.75	364	0.00031397	7.0383	By MS/MS	By MS/MS	By MS/MS	By MS/MS	By MS/MS	By MS/MS	By MS/MS	By MS/MS	182070000	175510000	110220000	84200000	63838000	84109000	100460000	65954000
P53992	P53992	21	21	20	Protein transport protein Sec24C	SEC24C	1	28.1	28.1	26.7	118.32	1094	0	79.599	By MS/MS	By MS/MS	By MS/MS	By MS/MS	By MS/MS	By MS/MS	By MS/MS	By MS/MS	585010000	695640000	541310000	476800000	458370000	586280000	762730000	768330000
P53999	P53999	11	11	11	Activated RNA polymerase II transcriptional coactivator p15	SUB1	1	51.2	51.2	51.2	14.395	127	0	68.648	By MS/MS	By MS/MS	By MS/MS	By MS/MS	By MS/MS	By MS/MS	By MS/MS	By MS/MS	2588200000	3230700000	2573400000	2415800000	2105800000	2378800000	2847500000	2737100000
P54105	P54105	6	6	6	Methylosome subunit pICln	CLNS1A	1	44.3	44.3	44.3	26.215	237	0	71.598	By MS/MS	By MS/MS	By MS/MS	By MS/MS	By MS/MS	By MS/MS	By MS/MS	By MS/MS	323260000	352480000	544580000	408470000	197800000	180370000	246210000	207720000
P54132	P54132	2	2	2	Bloom syndrome protein	BLM	1	1.5	1.5	1.5	159	1417	0.0039158	2.3058	By MS/MS	By MS/MS	By MS/MS	By MS/MS	By MS/MS	By MS/MS	By MS/MS	By MS/MS	106600000	106590000	83910000	72622000	94074000	90630000	114810000	99197000
P54136	P54136	45	45	45	Arginine--tRNA ligase, cytoplasmic	RARS	1	64.2	64.2	64.2	75.378	660	0	323.31	By MS/MS	By MS/MS	By MS/MS	By MS/MS	By MS/MS	By MS/MS	By MS/MS	By MS/MS	6826800000	7432100000	6501000000	5262300000	6171100000	6465200000	7200500000	7105000000
P54577	P54577	42	42	42	Tyrosine--tRNA ligase, cytoplasmic;Tyrosine--tRNA ligase, cytoplasmic, N-terminally processed	YARS	1	77.5	77.5	77.5	59.143	528	0	263.67	By MS/MS	By MS/MS	By MS/MS	By MS/MS	By MS/MS	By MS/MS	By MS/MS	By MS/MS	5219900000	6238400000	4246300000	3944100000	4695900000	4808600000	5346200000	5352200000
P54578	P54578	21	21	21	Ubiquitin carboxyl-terminal hydrolase 14	USP14	1	62.1	62.1	62.1	56.068	494	0	162.4	By MS/MS	By MS/MS	By MS/MS	By MS/MS	By MS/MS	By MS/MS	By MS/MS	By MS/MS	1515100000	1608900000	1380500000	1263200000	1146200000	1497300000	1239500000	1271700000
P54619;Q9UGJ0	P54619	9;1	9;1	9;1	5-AMP-activated protein kinase subunit gamma-1	PRKAG1	2	38.4	38.4	38.4	37.579	331	0	125.03	By MS/MS	By MS/MS	By MS/MS	By MS/MS	By MS/MS	By MS/MS	By MS/MS	By MS/MS	344960000	400740000	237720000	297210000	227990000	218540000	182920000	325060000
P54687	P54687	10	10	10	Branched-chain-amino-acid aminotransferase, cytosolic	BCAT1	1	33.2	33.2	33.2	42.966	386	0	38.041	By MS/MS	By MS/MS	By MS/MS	By MS/MS	By MS/MS	By MS/MS	By MS/MS	By MS/MS	636950000	674860000	452710000	465070000	363620000	452240000	1098100000	625690000
P54707	P54707	5	1	0	Potassium-transporting ATPase alpha chain 2	ATP12A	1	4.3	0.7	0	115.51	1039	1	-2	By MS/MS	By MS/MS	By matching	By MS/MS	By matching	By matching	By matching	By matching	196590000	252770000	192580000	152710000	199850000	147590000	185830000	173390000
P54709	P54709	12	12	12	Sodium/potassium-transporting ATPase subunit beta-3	ATP1B3	1	43.4	43.4	43.4	31.512	279	0	31.523	By MS/MS	By MS/MS	By MS/MS	By MS/MS	By MS/MS	By MS/MS	By MS/MS	By MS/MS	901300000	1261700000	1243400000	827330000	799800000	795270000	869700000	839210000
P54725	P54725	11	9	9	UV excision repair protein RAD23 homolog A	RAD23A	1	50.1	45.5	45.5	39.609	363	0	62.113	By MS/MS	By MS/MS	By MS/MS	By MS/MS	By MS/MS	By MS/MS	By MS/MS	By MS/MS	390840000	482200000	402410000	381320000	309240000	310520000	220030000	235080000
P54727	P54727	15	15	13	UV excision repair protein RAD23 homolog B	RAD23B	1	39.1	39.1	37.2	43.171	409	0	170.41	By MS/MS	By MS/MS	By MS/MS	By MS/MS	By MS/MS	By MS/MS	By MS/MS	By MS/MS	3260200000	3705400000	2920100000	2688300000	2662200000	2406400000	2616900000	2851600000
P54819	P54819	12	12	12	Adenylate kinase 2, mitochondrial;Adenylate kinase 2, mitochondrial, N-terminally processed	AK2	1	74.5	74.5	74.5	26.477	239	0	178.18	By MS/MS	By MS/MS	By MS/MS	By MS/MS	By MS/MS	By MS/MS	By MS/MS	By MS/MS	3778400000	3833600000	3080400000	2988100000	3157200000	3704300000	3775100000	3684900000
P54886	P54886	30	30	30	Delta-1-pyrroline-5-carboxylate synthase;Glutamate 5-kinase;Gamma-glutamyl phosphate reductase	ALDH18A1	1	47.2	47.2	47.2	87.301	795	0	234.57	By MS/MS	By MS/MS	By MS/MS	By MS/MS	By MS/MS	By MS/MS	By MS/MS	By MS/MS	1991600000	1985400000	1426800000	1317800000	1452700000	1189000000	1967700000	1474100000
P54920;Q9H115	P54920	16;1	16;1	16;1	Alpha-soluble NSF attachment protein	NAPA	2	72.5	72.5	72.5	33.232	295	0	119.32	By MS/MS	By MS/MS	By MS/MS	By MS/MS	By MS/MS	By MS/MS	By MS/MS	By MS/MS	1057000000	1101900000	945650000	689870000	1003800000	1064100000	1098500000	1012800000
P55010	P55010	16	16	16	Eukaryotic translation initiation factor 5	EIF5	1	41.8	41.8	41.8	49.222	431	0	63.702	By MS/MS	By MS/MS	By MS/MS	By MS/MS	By MS/MS	By MS/MS	By MS/MS	By MS/MS	1402900000	1339000000	1527900000	1213600000	1126100000	867810000	967030000	1329200000
P55036	P55036	13	13	10	26S proteasome non-ATPase regulatory subunit 4	PSMD4	1	43.8	43.8	36.9	40.736	377	0	252.92	By MS/MS	By MS/MS	By MS/MS	By MS/MS	By MS/MS	By MS/MS	By MS/MS	By MS/MS	1839600000	1999900000	1451200000	1479700000	1446100000	1744500000	1870900000	1520000000
P55039	P55039	11	11	11	Developmentally-regulated GTP-binding protein 2	DRG2	1	37.6	37.6	37.6	40.746	364	0	20.208	By MS/MS	By MS/MS	By MS/MS	By MS/MS	By MS/MS	By MS/MS	By MS/MS	By MS/MS	249260000	246640000	205080000	173310000	233300000	196730000	193070000	238700000
P55060	P55060	55	55	55	Exportin-2	CSE1L	1	63	63	63	110.42	971	0	323.31	By MS/MS	By MS/MS	By MS/MS	By MS/MS	By MS/MS	By MS/MS	By MS/MS	By MS/MS	52225000000	36730000000	25780000000	26435000000	24545000000	51542000000	9786000000	30551000000
P55072	P55072	57	57	57	Transitional endoplasmic reticulum ATPase	VCP	1	73.4	73.4	73.4	89.321	806	0	323.31	By MS/MS	By MS/MS	By MS/MS	By MS/MS	By MS/MS	By MS/MS	By MS/MS	By MS/MS	20981000000	23271000000	18917000000	16454000000	18674000000	18199000000	22772000000	20510000000
P55081	P55081	8	8	8	Microfibrillar-associated protein 1	MFAP1	1	23.5	23.5	23.5	51.958	439	0	42.476	By MS/MS	By MS/MS	By MS/MS	By MS/MS	By MS/MS	By MS/MS	By MS/MS	By MS/MS	80735000	191760000	186900000	220700000	112890000	138470000	127200000	153820000
P55084	P55084	24	24	24	Trifunctional enzyme subunit beta, mitochondrial;3-ketoacyl-CoA thiolase	HADHB	1	60.5	60.5	60.5	51.294	474	0	137.43	By MS/MS	By MS/MS	By MS/MS	By MS/MS	By MS/MS	By MS/MS	By MS/MS	By MS/MS	1622000000	2018300000	1950400000	1503400000	1197000000	1625700000	1566400000	1703100000
P55145	P55145	10	10	10	Mesencephalic astrocyte-derived neurotrophic factor	MANF	1	47.8	47.8	47.8	20.7	182	0	43.094	By MS/MS	By MS/MS	By MS/MS	By MS/MS	By MS/MS	By MS/MS	By MS/MS	By MS/MS	859790000	823410000	787060000	694570000	780830000	813820000	997110000	784250000
P55199	P55199	3	3	3	RNA polymerase II elongation factor ELL	ELL	1	6.9	6.9	6.9	68.264	621	0.00028969	5.221		By matching	By MS/MS				By MS/MS	By MS/MS		28182000	14982000
P55209	P55209	20	20	18	Nucleosome assembly protein 1-like 1	NAP1L1	1	48.6	48.6	46	45.374	391	0	323.31	By MS/MS	By MS/MS	By MS/MS	By MS/MS	By MS/MS	By MS/MS	By MS/MS	By MS/MS	8130600000	9153500000	7456400000	6705300000	6783700000	7364000000	8251800000	8111500000
P55210	P55210	5	5	5	Caspase-7;Caspase-7 subunit p20;Caspase-7 subunit p11	CASP7	1	22.8	22.8	22.8	34.276	303	0	12.287	By matching	By MS/MS	By matching	By MS/MS	By MS/MS	By MS/MS	By MS/MS	By MS/MS	24276000	29471000	32482000	35776000	94228000	131360000	131070000	120420000
P55212	P55212	2	2	2	Caspase-6;Caspase-6 subunit p18;Caspase-6 subunit p11	CASP6	1	7.2	7.2	7.2	33.31	293	0.00032744	8.2525	By matching	By matching	By matching	By MS/MS	By MS/MS	By matching	By matching	By MS/MS	5294200	7212500	6100400	5802000	9026100	4874300	2921000	4952100
P55263	P55263	8	8	8	Adenosine kinase	ADK	1	28.5	28.5	28.5	40.545	362	0	16.295	By MS/MS	By MS/MS	By MS/MS	By MS/MS	By MS/MS	By MS/MS	By MS/MS	By MS/MS	161970000	236180000	214440000	147880000	115670000	163150000	151440000	171550000
P55265	P55265	35	35	35	Double-stranded RNA-specific adenosine deaminase	ADAR	1	36.7	36.7	36.7	136.06	1226	0	127.51	By MS/MS	By MS/MS	By MS/MS	By MS/MS	By MS/MS	By MS/MS	By MS/MS	By MS/MS	1360400000	1607600000	1015600000	828690000	1300100000	1176100000	1660800000	1496800000
P55290	P55290	2	2	2	Cadherin-13	CDH13	1	2.7	2.7	2.7	78.286	713	0.00053305	3.5597		By MS/MS	By matching	By MS/MS	By MS/MS						134210000	143540000
P55327	P55327	11	11	11	Tumor protein D52	TPD52	1	64.7	64.7	64.7	24.327	224	0	228.23	By MS/MS	By MS/MS	By MS/MS	By MS/MS	By MS/MS	By MS/MS	By MS/MS	By MS/MS	975980000	1223300000	862790000	879050000	851500000	944390000	998990000	907640000
P55735	P55735	9	9	9	Protein SEC13 homolog	SEC13	1	45	45	45	35.54	322	0	107.97	By MS/MS	By MS/MS	By MS/MS	By MS/MS	By MS/MS	By MS/MS	By MS/MS	By MS/MS	597990000	671340000	744200000	643010000	409340000	370820000	680160000	522700000
P55769	P55769	9	9	9	NHP2-like protein 1;NHP2-like protein 1, N-terminally processed	NHP2L1	1	75	75	75	14.173	128	0	79.256	By MS/MS	By MS/MS	By MS/MS	By MS/MS	By MS/MS	By MS/MS	By MS/MS	By MS/MS	1458600000	1671400000	1452800000	1134900000	1127000000	1457000000	1896400000	1865400000
P55786;A6NEC2	P55786	31;13	31;13	31;13	Puromycin-sensitive aminopeptidase	NPEPPS	2	38.8	38.8	38.8	103.28	919	0	172.66	By MS/MS	By MS/MS	By MS/MS	By MS/MS	By MS/MS	By MS/MS	By MS/MS	By MS/MS	1460300000	1592100000	1147000000	930600000	880190000	1053500000	1158100000	1140700000
P55795	P55795	15	6	5	Heterogeneous nuclear ribonucleoprotein H2	HNRNPH2	1	41.9	22.3	17.6	49.263	449	0	42.898	By MS/MS	By MS/MS	By MS/MS	By MS/MS	By MS/MS	By MS/MS	By MS/MS	By MS/MS	413630000	422640000	386110000	353570000	389280000	411010000	486950000	394990000
P55809	P55809	10	10	10	Succinyl-CoA:3-ketoacid coenzyme A transferase 1, mitochondrial	OXCT1	1	25	25	25	56.157	520	0	16.767	By MS/MS	By MS/MS	By MS/MS	By MS/MS	By MS/MS	By MS/MS	By matching	By MS/MS	215010000	352660000	341460000	241900000	308560000	191370000	142050000	204780000
P55884	P55884	37	37	37	Eukaryotic translation initiation factor 3 subunit B	EIF3B	1	55.4	55.4	55.4	92.48	814	0	323.31	By MS/MS	By MS/MS	By MS/MS	By MS/MS	By MS/MS	By MS/MS	By MS/MS	By MS/MS	3964200000	4888700000	3769200000	3567400000	3434900000	3824800000	3807800000	3904200000
P55957	P55957	5	5	5	BH3-interacting domain death agonist;BH3-interacting domain death agonist p15;BH3-interacting domain death agonist p13;BH3-interacting domain death agonist p11	BID	1	42.1	42.1	42.1	21.994	195	0	75.062	By MS/MS	By MS/MS	By MS/MS	By MS/MS	By MS/MS	By MS/MS	By MS/MS	By MS/MS	156420000	232520000	264190000	297600000	229260000	294710000	258580000	236790000
P56134	P56134	4	4	4	ATP synthase subunit f, mitochondrial	ATP5J2	1	41.5	41.5	41.5	10.918	94	0	17.565	By MS/MS	By MS/MS	By MS/MS	By MS/MS	By MS/MS	By MS/MS	By MS/MS	By MS/MS	320580000	343810000	277350000	224600000	222950000	286840000	293140000	333100000
P56182	P56182	5	5	5	Ribosomal RNA processing protein 1 homolog A	RRP1	1	18.7	18.7	18.7	52.839	461	0	33.929	By MS/MS	By MS/MS	By MS/MS	By MS/MS	By MS/MS	By MS/MS	By MS/MS	By MS/MS	165960000	215630000	194450000	148940000	210820000	203430000	213970000	236870000
P56192	P56192	33	33	33	Methionine--tRNA ligase, cytoplasmic	MARS	1	48.4	48.4	48.4	101.11	900	0	272.42	By MS/MS	By MS/MS	By MS/MS	By MS/MS	By MS/MS	By MS/MS	By MS/MS	By MS/MS	2243100000	2402000000	2062200000	1597200000	1687000000	1646700000	1659300000	2156500000
P56211	P56211	3	2	2	cAMP-regulated phosphoprotein 19	ARPP19	1	40.2	30.4	30.4	12.323	112	0.00032041	7.5908	By matching	By matching	By MS/MS	By matching	By matching	By matching	By matching	By MS/MS	48100000	54776000	35642000	27922000	35796000	51300000	59543000	37233000
P56270	P56270	2	2	2	Myc-associated zinc finger protein	MAZ	1	6.7	6.7	6.7	48.607	477	0.00028458	4.8239	By MS/MS	By MS/MS	By MS/MS	By MS/MS		By MS/MS	By matching		21284000	43497000	34371000	17479000			45605000
P56378	P56378	2	2	2	6.8 kDa mitochondrial proteolipid	MP68	1	32.8	32.8	32.8	6.662	58	0.00052966	3.4812	By MS/MS	By MS/MS	By MS/MS	By MS/MS	By MS/MS	By MS/MS	By MS/MS	By MS/MS	110080000	155870000	107760000	45692000	104090000	40030000	95717000	131350000
P56385	P56385	3	3	3	ATP synthase subunit e, mitochondrial	ATP5I	1	46.4	46.4	46.4	7.9331	69	0.00027457	4.0509	By MS/MS	By MS/MS	By MS/MS	By MS/MS	By MS/MS	By MS/MS	By MS/MS	By MS/MS	200380000	236630000	144150000	160150000	135970000	181150000	217220000	210730000
P56537	P56537	10	10	10	Eukaryotic translation initiation factor 6	EIF6	1	60	60	60	26.599	245	0	323.31	By MS/MS	By MS/MS	By MS/MS	By MS/MS	By MS/MS	By MS/MS	By MS/MS	By MS/MS	5478900000	7002300000	4918600000	5442000000	6062700000	5430900000	6185700000	5923500000
P56545	P56545	14	14	10	C-terminal-binding protein 2	CTBP2	1	41.6	41.6	33.9	48.944	445	0	61.615	By MS/MS	By MS/MS	By MS/MS	By MS/MS	By MS/MS	By MS/MS	By MS/MS	By MS/MS	1023000000	990620000	854300000	777920000	524070000	553840000	726350000	529450000
P56556	P56556	2	2	2	NADH dehydrogenase [ubiquinone] 1 alpha subcomplex subunit 6	NDUFA6	1	12.3	12.3	12.3	17.871	154	0.0034722	2.4712	By MS/MS	By MS/MS	By MS/MS	By MS/MS	By MS/MS	By MS/MS	By MS/MS	By MS/MS	49358000	36535000	66538000	64941000	48008000	64487000	42828000	43530000
P56693;P57073;P48436	P56693	4;1;1	4;1;1	4;1;1	Transcription factor SOX-10	SOX10	3	15.7	15.7	15.7	49.911	466	0	26.695	By MS/MS	By MS/MS	By MS/MS	By MS/MS	By MS/MS	By MS/MS	By MS/MS	By MS/MS	139780000	125520000	240780000	249990000	89842000	124160000	113930000	149740000
P56945	P56945	7	7	7	Breast cancer anti-estrogen resistance protein 1	BCAR1	1	13.8	13.8	13.8	93.371	870	0	20.459	By MS/MS	By MS/MS	By MS/MS	By MS/MS	By MS/MS	By MS/MS	By MS/MS	By MS/MS	96136000	71567000	87863000	85501000	141840000	60617000	186110000	97327000
P57076	P57076	3	3	3	UPF0769 protein C21orf59	C21orf59	1	17.6	17.6	17.6	33.224	290	0.00031456	7.067	By MS/MS	By MS/MS	By MS/MS	By MS/MS	By MS/MS	By MS/MS	By MS/MS	By MS/MS	70443000	72684000	66051000	49119000	43287000	41283000	41012000	37074000
P57081	P57081	5	5	5	tRNA (guanine-N(7)-)-methyltransferase non-catalytic subunit WDR4	WDR4	1	16	16	16	45.489	412	0.00032552	8.009	By MS/MS	By MS/MS	By MS/MS	By MS/MS	By MS/MS	By MS/MS	By MS/MS	By MS/MS	101920000	102300000	47492000	65080000	77741000	94542000	87851000	64476000
P57088	P57088	9	9	9	Transmembrane protein 33	TMEM33	1	34	34	34	27.978	247	0	38.497	By MS/MS	By MS/MS	By MS/MS	By MS/MS	By MS/MS	By MS/MS	By MS/MS	By MS/MS	822590000	988080000	811910000	639260000	655180000	664820000	598800000	878270000
P57678	P57678	12	12	12	Gem-associated protein 4	GEMIN4	1	15.4	15.4	15.4	120.04	1058	0	39.374	By MS/MS	By MS/MS	By MS/MS	By MS/MS	By MS/MS	By MS/MS	By MS/MS	By MS/MS	284340000	394870000	336750000	340120000	252410000	332010000	325990000	276870000
P57721	P57721	7	1	1	Poly(rC)-binding protein 3	PCBP3	1	21.8	3.2	3.2	39.465	371	0.00028043	4.4887	By MS/MS	By MS/MS	By MS/MS	By MS/MS	By MS/MS	By MS/MS	By MS/MS	By MS/MS	152990000	188000000	146000000		149380000	131790000	155890000	178070000
P57723	P57723	3	2	2	Poly(rC)-binding protein 4	PCBP4	1	8.7	6.7	6.7	41.481	403	0.00053262	3.5543	By MS/MS	By matching	By matching	By MS/MS	By matching	By MS/MS	By matching	By matching	12809000			34245000
P57737	P57737	2	2	2	Coronin-7	CORO7	1	4.4	4.4	4.4	100.6	925	0.00027964	4.4352	By matching	By MS/MS	By MS/MS	By MS/MS	By MS/MS	By MS/MS	By MS/MS	By MS/MS	16713000	39032000	43065000	14844000	35098000	10862000
P57740	P57740	11	11	11	Nuclear pore complex protein Nup107	NUP107	1	14.8	14.8	14.8	106.37	925	0	19.119	By MS/MS	By MS/MS	By MS/MS	By MS/MS	By MS/MS	By MS/MS	By matching	By MS/MS	259860000	300760000	212000000	217890000	137950000	135760000	58380000	192030000
P57764	P57764	7	7	7	Gasdermin-D	GSDMD	1	26.9	26.9	26.9	52.8	484	0	34.088	By MS/MS	By MS/MS	By MS/MS	By MS/MS	By MS/MS	By MS/MS	By MS/MS	By MS/MS	282990000	215970000	134150000	146170000	177660000	222360000	210160000	241120000
P57772	P57772	3	3	3	Selenocysteine-specific elongation factor	EEFSEC	1	7.2	7.2	7.2	65.304	596	0.00030675	6.4084	By MS/MS	By MS/MS	By MS/MS	By MS/MS	By MS/MS		By matching	By MS/MS		19900000	11361000	13925000	8604300		12987000	8062900
P58004	P58004	3	3	3	Sestrin-2	SESN2	1	9.4	9.4	9.4	54.493	480	0.00053177	3.544					By MS/MS	By MS/MS	By MS/MS	By MS/MS						13793000	26487000	31441000
P58546	P58546	9	9	9	Myotrophin	MTPN	1	83.1	83.1	83.1	12.895	118	0	167.4	By MS/MS	By MS/MS	By MS/MS	By MS/MS	By MS/MS	By MS/MS	By MS/MS	By MS/MS	1934200000	1782700000	1880300000	1457100000	1213400000	1499700000	1577200000	1659800000
P59998	P59998	9	9	9	Actin-related protein 2/3 complex subunit 4	ARPC4	1	60.1	60.1	60.1	19.667	168	0	58.442	By MS/MS	By MS/MS	By MS/MS	By MS/MS	By MS/MS	By MS/MS	By MS/MS	By MS/MS	1739600000	1767500000	1360700000	1228600000	1328700000	1407800000	1672000000	1558600000
P60033	P60033	2	2	2	CD81 antigen	CD81	1	16.5	16.5	16.5	25.809	236	0	11.77	By MS/MS	By MS/MS	By MS/MS	By MS/MS	By MS/MS	By MS/MS	By matching	By MS/MS	148900000	164030000	136560000	133230000	115080000	116430000	143420000	127130000
P60059	P60059	2	2	2	Protein transport protein Sec61 subunit gamma	SEC61G	1	36.8	36.8	36.8	7.7412	68	0	16.792	By MS/MS	By MS/MS	By MS/MS	By MS/MS	By MS/MS	By MS/MS	By MS/MS	By MS/MS	129620000	156470000	139950000	98854000	129840000	129980000	148200000	174950000
P60174	P60174	24	24	24	Triosephosphate isomerase	TPI1	1	79.7	79.7	79.7	30.791	286	0	323.31	By MS/MS	By MS/MS	By MS/MS	By MS/MS	By MS/MS	By MS/MS	By MS/MS	By MS/MS	29769000000	34479000000	27802000000	25577000000	27061000000	25561000000	29813000000	27491000000
P60228	P60228	22	22	22	Eukaryotic translation initiation factor 3 subunit E	EIF3E	1	58.7	58.7	58.7	52.22	445	0	189.05	By MS/MS	By MS/MS	By MS/MS	By MS/MS	By MS/MS	By MS/MS	By MS/MS	By MS/MS	2810300000	3213600000	2718600000	1962500000	2084800000	2170300000	2865400000	3039300000
P60468	P60468	3	3	3	Protein transport protein Sec61 subunit beta	SEC61B	1	37.5	37.5	37.5	9.9743	96	0	11.797	By MS/MS	By MS/MS	By MS/MS	By MS/MS	By MS/MS	By MS/MS	By MS/MS	By MS/MS	582860000	470500000	516890000	389500000	575830000	454870000	581070000	605510000
P60510	P60510	9	7	7	Serine/threonine-protein phosphatase 4 catalytic subunit	PPP4C	1	41.4	36.5	36.5	35.08	307	0	22.916	By MS/MS	By MS/MS	By MS/MS	By MS/MS	By MS/MS	By MS/MS	By MS/MS	By MS/MS	162100000	203070000	208230000	186030000	91134000	103670000	47656000	121560000
P60520	P60520	3	3	3	Gamma-aminobutyric acid receptor-associated protein-like 2	GABARAPL2	1	30.8	30.8	30.8	13.667	117	0.0046409	2.2854	By MS/MS	By MS/MS	By MS/MS	By MS/MS	By MS/MS	By MS/MS	By matching	By MS/MS	29773000	87458000	80902000	15943000	34440000	43149000	13126000	19235000
P60604	P60604	2	2	2	Ubiquitin-conjugating enzyme E2 G2	UBE2G2	1	22.4	22.4	22.4	18.566	165	0.00031075	6.7861	By MS/MS	By MS/MS	By MS/MS	By MS/MS	By MS/MS	By MS/MS	By MS/MS	By MS/MS	43131000	111460000	79683000	86054000	61916000	74977000	94380000	113300000
P60660;P14649	P60660	9;2	9;2	9;2	Myosin light polypeptide 6	MYL6	2	60.3	60.3	60.3	16.93	151	0	102.78	By MS/MS	By MS/MS	By MS/MS	By MS/MS	By MS/MS	By MS/MS	By MS/MS	By MS/MS	4611800000	5170100000	4679800000	4152100000	3976400000	4113300000	4872800000	5084400000
P60709;Q9BYX7	P60709	32;4	1;0	1;0	Actin, cytoplasmic 1;Actin, cytoplasmic 1, N-terminally processed	ACTB	2	80.8	4.5	4.5	41.736	375	0	68.562	By MS/MS	By MS/MS	By MS/MS	By MS/MS	By MS/MS	By MS/MS	By MS/MS	By MS/MS	1055600000	1331500000	1326600000	1067900000	941840000	978350000	757170000	1212200000
P60842	P60842	34	34	18	Eukaryotic initiation factor 4A-I	EIF4A1	1	81.8	81.8	52	46.153	406	0	323.31	By MS/MS	By MS/MS	By MS/MS	By MS/MS	By MS/MS	By MS/MS	By MS/MS	By MS/MS	28410000000	33114000000	25795000000	21859000000	24997000000	25013000000	29150000000	27971000000
P60866	P60866	7	7	7	40S ribosomal protein S20	RPS20	1	39.5	39.5	39.5	13.373	119	0	54.074	By MS/MS	By MS/MS	By MS/MS	By MS/MS	By MS/MS	By MS/MS	By MS/MS	By MS/MS	5338000000	5518000000	4720000000	4126800000	4494400000	5199600000	5564700000	4892900000
P60891	P60891	12	5	3	Ribose-phosphate pyrophosphokinase 1	PRPS1	1	45.6	18.6	11.9	34.834	318	0	20.569	By MS/MS	By MS/MS	By MS/MS	By MS/MS	By MS/MS	By MS/MS	By MS/MS	By MS/MS	228860000	316910000	233730000	242010000	183130000	256010000	272960000	194800000
P60900	P60900	17	17	17	Proteasome subunit alpha type-6	PSMA6	1	68.7	68.7	68.7	27.399	246	0	256.23	By MS/MS	By MS/MS	By MS/MS	By MS/MS	By MS/MS	By MS/MS	By MS/MS	By MS/MS	2346200000	2902400000	2822300000	2013800000	3172000000	2807200000	3410700000	3575000000
P60903	P60903	5	5	5	Protein S100-A10	S100A10	1	59.8	59.8	59.8	11.203	97	0	115.86	By MS/MS	By MS/MS	By MS/MS	By MS/MS	By MS/MS	By MS/MS	By MS/MS	By MS/MS	4923900000	4560900000	4063200000	3671000000	3213800000	3529200000	3267500000	3254600000
P60953;P17081;Q9H4E5	P60953	10;1;1	10;1;1	9;0;0	Cell division control protein 42 homolog	CDC42	3	62.8	62.8	57.1	21.258	191	0	109.37	By MS/MS	By MS/MS	By MS/MS	By MS/MS	By MS/MS	By MS/MS	By MS/MS	By MS/MS	3214300000	3595100000	3105900000	2397500000	3141600000	1956900000	2403800000	3387400000
P60981	P60981	11	10	10	Destrin	DSTN	1	59.4	55.2	55.2	18.506	165	0	74.355	By MS/MS	By MS/MS	By MS/MS	By MS/MS	By MS/MS	By MS/MS	By MS/MS	By MS/MS	2225000000	2075800000	1674000000	1293000000	1500900000	1487700000	1303500000	1217400000
P60983;O60234	P60983	4;1	4;1	4;1	Glia maturation factor beta	GMFB	2	41.5	41.5	41.5	16.713	142	0	24.566	By MS/MS	By MS/MS	By MS/MS	By MS/MS	By MS/MS	By MS/MS	By MS/MS	By MS/MS	186990000	241390000	247420000	218770000	213670000	188680000	146790000	156280000
P61006	P61006	8	6	5	Ras-related protein Rab-8A	RAB8A	1	39.1	30.4	23.2	23.668	207	0	54.969	By MS/MS	By MS/MS	By MS/MS	By MS/MS	By MS/MS	By MS/MS	By MS/MS	By MS/MS	358980000	422750000	319140000	250230000	280400000	263170000	300820000	320680000
P61009	P61009	2	2	2	Signal peptidase complex subunit 3	SPCS3	1	11.7	11.7	11.7	20.313	180	0.00029087	5.3253	By MS/MS	By MS/MS	By MS/MS	By MS/MS	By MS/MS	By MS/MS	By MS/MS	By MS/MS	116780000	151530000	120570000	105360000	111650000	116050000	118200000	124630000
P61011	P61011	14	14	14	Signal recognition particle 54 kDa protein	SRP54	1	35.5	35.5	35.5	55.704	504	0	86.086	By MS/MS	By MS/MS	By MS/MS	By MS/MS	By MS/MS	By MS/MS	By MS/MS	By MS/MS	566960000	677830000	589840000	456460000	587400000	488430000	634180000	640530000
P61019;Q8WUD1	P61019	15;7	15;7	15;7	Ras-related protein Rab-2A	RAB2A	2	68.9	68.9	68.9	23.545	212	0	77.498	By MS/MS	By MS/MS	By MS/MS	By MS/MS	By MS/MS	By MS/MS	By MS/MS	By MS/MS	936040000	1080100000	858130000	683830000	774760000	659860000	918230000	815640000
P61020	P61020	7	4	4	Ras-related protein Rab-5B	RAB5B	1	39.1	24.2	24.2	23.707	215	0	9.4464	By MS/MS	By MS/MS	By MS/MS	By MS/MS	By MS/MS	By matching	By MS/MS	By MS/MS	61975000	19862000	70002000	11951000	41252000	30004000	40415000	52294000
P61024	P61024	3	3	3	Cyclin-dependent kinases regulatory subunit 1	CKS1B	1	65.8	65.8	65.8	9.6601	79	0	11.052	By MS/MS	By MS/MS	By MS/MS	By MS/MS	By MS/MS	By MS/MS	By MS/MS	By MS/MS	95527000	250240000	154570000	132150000	30091000	47418000	49815000	46677000
P61026	P61026	11	10	9	Ras-related protein Rab-10	RAB10	1	52	46.5	43	22.541	200	0	39.622	By MS/MS	By MS/MS	By MS/MS	By MS/MS	By MS/MS	By MS/MS	By MS/MS	By MS/MS	1330600000	6317700000	1561400000	1239700000	1510700000	1098000000	1861500000	1581700000
P61077;P62837	P61077;P62837	5;3	5;3	4;2	Ubiquitin-conjugating enzyme E2 D3;Ubiquitin-conjugating enzyme E2 D2	UBE2D3;UBE2D2	2	42.9	42.9	30.6	16.687	147	0	99.266	By MS/MS	By MS/MS	By MS/MS	By MS/MS	By MS/MS	By MS/MS	By MS/MS	By MS/MS	1301700000	1387500000	963380000	1065200000	900100000	1140700000	1394500000	1097400000
P61081	P61081	12	12	12	NEDD8-conjugating enzyme Ubc12	UBE2M	1	59.6	59.6	59.6	20.9	183	0	53.566	By MS/MS	By MS/MS	By MS/MS	By MS/MS	By MS/MS	By MS/MS	By MS/MS	By MS/MS	1806100000	1919600000	1520600000	1367300000	1389300000	1449400000	1488900000	1587600000
P61086	P61086	14	14	14	Ubiquitin-conjugating enzyme E2 K	UBE2K	1	81	81	81	22.406	200	0	58.758	By MS/MS	By MS/MS	By MS/MS	By MS/MS	By MS/MS	By MS/MS	By MS/MS	By MS/MS	1303900000	1053700000	1139500000	1462300000	759120000	874050000	975340000	2143600000
P61088;Q5JXB2	P61088;Q5JXB2	12;7	12;7	12;7	Ubiquitin-conjugating enzyme E2 N;Putative ubiquitin-conjugating enzyme E2 N-like	UBE2N;UBE2NL	2	63.8	63.8	63.8	17.138	152	0	51.802	By MS/MS	By MS/MS	By MS/MS	By MS/MS	By MS/MS	By MS/MS	By MS/MS	By MS/MS	3409200000	4071200000	3496200000	2788200000	2775500000	2977300000	2966500000	3340100000
P61106	P61106	13	13	13	Ras-related protein Rab-14	RAB14	1	74.9	74.9	74.9	23.897	215	0	123.67	By MS/MS	By MS/MS	By MS/MS	By MS/MS	By MS/MS	By MS/MS	By MS/MS	By MS/MS	1306300000	1484800000	1397000000	1124400000	1129000000	1280900000	1571500000	1519400000
P61158;Q9P1U1;Q9C0K3	P61158	23;4;2	23;4;2	23;4;2	Actin-related protein 3	ACTR3	3	66	66	66	47.371	418	0	145.85	By MS/MS	By MS/MS	By MS/MS	By MS/MS	By MS/MS	By MS/MS	By MS/MS	By MS/MS	2381600000	2715700000	2252700000	2082300000	2303600000	2582500000	3024900000	2410600000
P61160	P61160	17	17	17	Actin-related protein 2	ACTR2	1	58.4	58.4	58.4	44.76	394	0	168.31	By MS/MS	By MS/MS	By MS/MS	By MS/MS	By MS/MS	By MS/MS	By MS/MS	By MS/MS	1987600000	2146800000	1658900000	1390100000	1392200000	1278800000	1694400000	1600700000
P61163	P61163	17	17	10	Alpha-centractin	ACTR1A	1	64.1	64.1	41.5	42.613	376	0	187.07	By MS/MS	By MS/MS	By MS/MS	By MS/MS	By MS/MS	By MS/MS	By MS/MS	By MS/MS	2135800000	2302000000	1688500000	1559400000	1339700000	1444500000	1643100000	1666900000
P61201	P61201	20	20	20	COP9 signalosome complex subunit 2	COPS2	1	53.3	53.3	53.3	51.596	443	0	140.36	By MS/MS	By MS/MS	By MS/MS	By MS/MS	By MS/MS	By MS/MS	By MS/MS	By MS/MS	1002100000	1255100000	999900000	841190000	692310000	902490000	1079300000	953360000
P61221	P61221	25	25	25	ATP-binding cassette sub-family E member 1	ABCE1	1	52.4	52.4	52.4	67.314	599	0	250.26	By MS/MS	By MS/MS	By MS/MS	By MS/MS	By MS/MS	By MS/MS	By MS/MS	By MS/MS	2365100000	2718200000	1573800000	1695800000	1531400000	1334800000	1753700000	1738700000
P61224;A6NIZ1;O95716	P61224;A6NIZ1	13;10;1	13;10;1	5;3;0	Ras-related protein Rap-1b;Ras-related protein Rap-1b-like protein	RAP1B	3	67.4	67.4	33.7	20.825	184	0	61.263	By MS/MS	By MS/MS	By MS/MS	By MS/MS	By MS/MS	By MS/MS	By MS/MS	By MS/MS	1615000000	1846300000	1596400000	1391500000	1792000000	888810000	1727400000	1721800000
P61244	P61244	2	2	2	Protein max	MAX	1	13.8	13.8	13.8	18.275	160	0.0046319	2.2675	By matching	By matching	By matching		By matching		By MS/MS	By MS/MS	12111000	17894000	12827000		15132000		12969000	15438000
P61247	P61247	29	29	29	40S ribosomal protein S3a	RPS3A	1	77.3	77.3	77.3	29.945	264	0	280.44	By MS/MS	By MS/MS	By MS/MS	By MS/MS	By MS/MS	By MS/MS	By MS/MS	By MS/MS	20773000000	20060000000	16707000000	14132000000	17494000000	17609000000	20966000000	17865000000
P61254	P61254	15	15	4	60S ribosomal protein L26	RPL26	1	54.5	54.5	13.8	17.258	145	0	35.925	By MS/MS	By MS/MS	By MS/MS	By MS/MS	By MS/MS	By MS/MS	By MS/MS	By MS/MS	7646000000	8854300000	7032200000	6086600000	7324600000	7141200000	9119800000	7537900000
P61289	P61289	12	12	12	Proteasome activator complex subunit 3	PSME3	1	46.9	46.9	46.9	29.506	254	0	128.2	By MS/MS	By MS/MS	By MS/MS	By MS/MS	By MS/MS	By MS/MS	By MS/MS	By MS/MS	1934100000	1985300000	1691900000	1417900000	1580200000	1672700000	1833700000	1793900000
P61313	P61313	15	15	15	60S ribosomal protein L15	RPL15	1	54.9	54.9	54.9	24.146	204	0	100.37	By MS/MS	By MS/MS	By MS/MS	By MS/MS	By MS/MS	By MS/MS	By MS/MS	By MS/MS	14801000000	13310000000	12134000000	9946800000	11445000000	10095000000	13577000000	15308000000
P61326	P61326	11	1	1	Protein mago nashi homolog	MAGOH	1	77.4	5.5	5.5	17.163	146	0.0055435	2.1506	By matching	By matching	By matching	By matching	By MS/MS	By MS/MS	By MS/MS	By MS/MS	40942000	40509000	43633000	34014000	33229000	42346000	48176000	37933000
P61353	P61353	11	11	11	60S ribosomal protein L27	RPL27	1	60.3	60.3	60.3	15.798	136	0	51.21	By MS/MS	By MS/MS	By MS/MS	By MS/MS	By MS/MS	By MS/MS	By MS/MS	By MS/MS	9255900000	8977600000	7596700000	6971400000	6779000000	8749400000	9016800000	6873600000
P61421	P61421	7	7	7	V-type proton ATPase subunit d 1	ATP6V0D1	1	29.3	29.3	29.3	40.329	351	0	31.123	By MS/MS	By MS/MS	By MS/MS	By MS/MS	By MS/MS	By MS/MS	By MS/MS	By MS/MS	241800000	116250000	179650000	134860000	190590000	194180000	178880000	222470000
P61513;A6NKH3	P61513	8;2	8;2	8;2	60S ribosomal protein L37a	RPL37A	2	67.4	67.4	67.4	10.275	92	0	80.274	By MS/MS	By MS/MS	By MS/MS	By MS/MS	By MS/MS	By MS/MS	By MS/MS	By MS/MS	6410000000	6579200000	5333000000	4905200000	5113400000	5198100000	6643700000	5534200000
P61586;P62745	P61586	13;2	13;2	5;0	Transforming protein RhoA	RHOA	2	74.1	74.1	31.1	21.768	193	0	141.83	By MS/MS	By MS/MS	By MS/MS	By MS/MS	By MS/MS	By MS/MS	By MS/MS	By MS/MS	3776700000	4092100000	3216000000	2730700000	2882100000	2706700000	3376200000	3200100000
P61587	P61587	5	5	5	Rho-related GTP-binding protein RhoE	RND3	1	24.6	24.6	24.6	27.368	244	0	13.83	By matching		By matching		By MS/MS	By MS/MS	By MS/MS	By MS/MS	6549600		2845800		93660000	75588000	87899000	77797000
P61599	P61599	6	6	6	N-alpha-acetyltransferase 20	NAA20	1	39.9	39.9	39.9	20.368	178	0	12.721	By MS/MS	By MS/MS	By MS/MS	By MS/MS	By MS/MS	By MS/MS	By MS/MS	By MS/MS	66277000	129080000	113310000	50254000	33532000	41195000	48604000	79901000
P61604	P61604	11	11	11	10 kDa heat shock protein, mitochondrial	HSPE1	1	81.4	81.4	81.4	10.932	102	0	51.014	By MS/MS	By MS/MS	By MS/MS	By MS/MS	By MS/MS	By MS/MS	By MS/MS	By MS/MS	9100100000	9500000000	8104400000	7362400000	7298000000	7890300000	9152400000	7749900000
P61619;Q9H9S3	P61619	8;3	8;3	8;3	Protein transport protein Sec61 subunit alpha isoform 1	SEC61A1	2	24.2	24.2	24.2	52.264	476	0	26.108	By MS/MS	By MS/MS	By MS/MS	By MS/MS	By MS/MS	By MS/MS	By MS/MS	By MS/MS	871740000	865550000	719130000	581110000	715960000	593730000	979880000	894610000
P61758	P61758	10	10	10	Prefoldin subunit 3	VBP1	1	50.3	50.3	50.3	22.658	197	0	86.306	By MS/MS	By MS/MS	By MS/MS	By MS/MS	By MS/MS	By MS/MS	By MS/MS	By MS/MS	1284100000	1599300000	1239700000	1070000000	1184800000	1198600000	1101500000	891400000
P61764	P61764	6	6	6	Syntaxin-binding protein 1	STXBP1	1	16.3	16.3	16.3	67.568	594	0	14.715	By MS/MS	By matching	By MS/MS	By MS/MS	By MS/MS	By MS/MS	By MS/MS	By MS/MS	176900000	179570000	143070000	84783000	138260000	142750000	96040000	175920000
P61769	P61769	4	4	4	Beta-2-microglobulin;Beta-2-microglobulin form pI 5.3	B2M	1	37.8	37.8	37.8	13.714	119	0	64.573	By MS/MS	By MS/MS	By MS/MS	By MS/MS	By MS/MS	By MS/MS	By MS/MS	By MS/MS	579430000	912000000	701350000	608150000	3027600000	3333300000	3191800000	3766900000
P61803	P61803	2	2	2	Dolichyl-diphosphooligosaccharide--protein glycosyltransferase subunit DAD1	DAD1	1	19.5	19.5	19.5	12.497	113	0.00031124	6.8309	By MS/MS	By MS/MS	By MS/MS	By MS/MS	By MS/MS	By MS/MS	By MS/MS	By MS/MS	129530000	169670000	77704000	65016000	73839000	122600000	39606000	146590000
P61916	P61916	6	6	6	Epididymal secretory protein E1	NPC2	1	44.4	44.4	44.4	16.57	151	0	49.334	By MS/MS	By MS/MS	By MS/MS	By MS/MS	By MS/MS	By MS/MS	By MS/MS	By MS/MS	555300000	621900000	686890000	439500000	376510000	335210000	379950000	403710000
P61923	P61923	5	5	5	Coatomer subunit zeta-1	COPZ1	1	32.8	32.8	32.8	20.198	177	0	25.392	By MS/MS	By MS/MS	By MS/MS	By MS/MS	By MS/MS	By MS/MS	By MS/MS	By MS/MS	535990000	293840000	243730000	195450000	559910000	485910000	264860000	636600000
P61927	P61927	3	3	3	60S ribosomal protein L37	RPL37	1	26.8	26.8	26.8	11.078	97	0.0015666	3.1854	By MS/MS	By matching	By MS/MS	By MS/MS	By MS/MS	By MS/MS	By MS/MS	By matching	547910000	210540000	226140000	509940000	150230000	1123200000	407790000	212780000
P61956;Q6EEV6;P55854	P61956	4;1;1	4;1;1	4;1;1	Small ubiquitin-related modifier 2	SUMO2	3	33.7	33.7	33.7	10.871	95	0	23.018	By MS/MS	By MS/MS	By MS/MS	By MS/MS	By MS/MS	By MS/MS	By MS/MS	By MS/MS	1487600000	1672700000	1060600000	1072500000	1150800000	1259300000	1368700000	1133700000
P61960	P61960	2	2	2	Ubiquitin-fold modifier 1	UFM1	1	58.8	58.8	58.8	9.1175	85	0	62.87	By MS/MS	By MS/MS	By MS/MS	By MS/MS	By MS/MS	By MS/MS	By MS/MS	By MS/MS	314550000	403800000	342390000	278720000	416680000	422240000	290800000	379650000
P61962	P61962	2	2	2	DDB1- and CUL4-associated factor 7	DCAF7	1	8.2	8.2	8.2	38.926	342	0.0059837	2.0706	By MS/MS	By MS/MS	By MS/MS	By MS/MS	By matching		By matching	By matching	62075000	36166000	26143000	89987000	28471000		37137000	19786000
P61964	P61964	7	7	7	WD repeat-containing protein 5	WDR5	1	35	35	35	36.588	334	0	32.042	By MS/MS	By MS/MS	By MS/MS	By MS/MS	By MS/MS	By MS/MS	By MS/MS	By MS/MS	529470000	315050000	335430000	314980000	298460000	329270000	359700000	323100000
P61966	P61966	4	4	4	AP-1 complex subunit sigma-1A	AP1S1	1	25.9	25.9	25.9	18.733	158	0	55.9	By MS/MS	By MS/MS	By MS/MS	By MS/MS	By MS/MS	By MS/MS	By MS/MS	By MS/MS	57594000	64161000	93731000	48460000	59979000	66693000	58309000	104850000
P61970	P61970	7	7	7	Nuclear transport factor 2	NUTF2	1	94.5	94.5	94.5	14.478	127	0	97.542	By MS/MS	By MS/MS	By MS/MS	By MS/MS	By MS/MS	By MS/MS	By MS/MS	By MS/MS	1308800000	1618200000	1133400000	1082000000	821510000	1013700000	955840000	946990000
P61978	P61978	34	34	34	Heterogeneous nuclear ribonucleoprotein K	HNRNPK	1	70	70	70	50.976	463	0	323.31	By MS/MS	By MS/MS	By MS/MS	By MS/MS	By MS/MS	By MS/MS	By MS/MS	By MS/MS	26809000000	33855000000	24397000000	22013000000	24115000000	25419000000	29000000000	26417000000
P61981	P61981	23	19	17	14-3-3 protein gamma;14-3-3 protein gamma, N-terminally processed	YWHAG	1	81.8	75.7	69.2	28.302	247	0	323.31	By MS/MS	By MS/MS	By MS/MS	By MS/MS	By MS/MS	By MS/MS	By MS/MS	By MS/MS	7465600000	8087600000	6044600000	5793200000	6249200000	6583400000	8476600000	7486900000
P62070	P62070	3	3	2	Ras-related protein R-Ras2	RRAS2	1	19.6	19.6	11.8	23.399	204	0	13.261	By MS/MS	By MS/MS	By MS/MS		By MS/MS	By matching	By MS/MS	By MS/MS	16662000	61127000	14763000		11539000	10045000	22363000	14445000
P62072	P62072	2	2	2	Mitochondrial import inner membrane translocase subunit Tim10	TIMM10	1	31.1	31.1	31.1	10.333	90	0.00027525	4.1014	By MS/MS	By MS/MS	By MS/MS	By MS/MS		By matching	By MS/MS	By MS/MS	50052000	40833000	32854000	41082000		12493000	76475000	87964000
P62081	P62081	20	20	20	40S ribosomal protein S7	RPS7	1	72.7	72.7	72.7	22.127	194	0	302.63	By MS/MS	By MS/MS	By MS/MS	By MS/MS	By MS/MS	By MS/MS	By MS/MS	By MS/MS	13829000000	17022000000	14275000000	12242000000	14337000000	13507000000	16639000000	14925000000
P62136	P62136	22	22	5	Serine/threonine-protein phosphatase PP1-alpha catalytic subunit	PPP1CA	1	66.7	66.7	23	37.512	330	0	192.51	By MS/MS	By MS/MS	By MS/MS	By MS/MS	By MS/MS	By MS/MS	By MS/MS	By MS/MS	4596900000	5146100000	4186000000	3433300000	3814900000	4058600000	4734300000	4569600000
P62140	P62140	22	7	7	Serine/threonine-protein phosphatase PP1-beta catalytic subunit	PPP1CB	1	66.1	30	30	37.186	327	0	48.156	By MS/MS	By MS/MS	By MS/MS	By MS/MS	By MS/MS	By MS/MS	By MS/MS	By MS/MS	504050000	504410000	410880000	371160000	384480000	367730000	492550000	651530000
P62191	P62191	21	21	21	26S protease regulatory subunit 4	PSMC1	1	58.4	58.4	58.4	49.184	440	0	262.99	By MS/MS	By MS/MS	By MS/MS	By MS/MS	By MS/MS	By MS/MS	By MS/MS	By MS/MS	2830200000	3362800000	2791800000	1935000000	2576500000	2622000000	2808400000	2465700000
P62195	P62195	23	23	22	26S protease regulatory subunit 8	PSMC5	1	65.8	65.8	62.8	45.626	406	0	210.48	By MS/MS	By MS/MS	By MS/MS	By MS/MS	By MS/MS	By MS/MS	By MS/MS	By MS/MS	2649800000	3071200000	2458100000	2169600000	2420400000	2418600000	3110900000	2439300000
P62241	P62241	15	15	15	40S ribosomal protein S8	RPS8	1	59.6	59.6	59.6	24.205	208	0	200.41	By MS/MS	By MS/MS	By MS/MS	By MS/MS	By MS/MS	By MS/MS	By MS/MS	By MS/MS	10017000000	11320000000	9096200000	8067400000	9038200000	9733400000	10694000000	9733400000
P62244	P62244	10	10	10	40S ribosomal protein S15a	RPS15A	1	72.3	72.3	72.3	14.839	130	0	73.899	By MS/MS	By MS/MS	By MS/MS	By MS/MS	By MS/MS	By MS/MS	By MS/MS	By MS/MS	5573400000	5603000000	5183500000	3739200000	5550300000	5174700000	7275400000	6445900000
P62249	P62249	17	17	17	40S ribosomal protein S16	RPS16	1	76.7	76.7	76.7	16.445	146	0	65.043	By MS/MS	By MS/MS	By MS/MS	By MS/MS	By MS/MS	By MS/MS	By MS/MS	By MS/MS	9616400000	9973500000	8081300000	8373200000	7957200000	10329000000	10283000000	8951100000
P62253	P62253	2	2	2	Ubiquitin-conjugating enzyme E2 G1;Ubiquitin-conjugating enzyme E2 G1, N-terminally processed	UBE2G1	1	12.9	12.9	12.9	19.509	170	0.00053576	3.6547	By MS/MS	By MS/MS	By MS/MS	By MS/MS	By MS/MS	By MS/MS	By MS/MS	By MS/MS	13954000	12014000	13899000	16833000	13543000	19415000	13302000	16925000
P62256	P62256	3	3	3	Ubiquitin-conjugating enzyme E2 H	UBE2H	1	21.3	21.3	21.3	20.655	183	0	10.846	By MS/MS	By MS/MS	By MS/MS	By MS/MS	By MS/MS	By MS/MS	By matching	By MS/MS	165960000	185060000	149550000	142590000	75155000	165840000	128780000	149630000
P62258	P62258	28	28	25	14-3-3 protein epsilon	YWHAE	1	78.4	78.4	75.3	29.174	255	0	323.31	By MS/MS	By MS/MS	By MS/MS	By MS/MS	By MS/MS	By MS/MS	By MS/MS	By MS/MS	29377000000	31320000000	28150000000	24240000000	24423000000	25735000000	27723000000	27448000000
P62263	P62263	12	12	12	40S ribosomal protein S14	RPS14	1	70.2	70.2	70.2	16.273	151	0	209.29	By MS/MS	By MS/MS	By MS/MS	By MS/MS	By MS/MS	By MS/MS	By MS/MS	By MS/MS	7118000000	8619500000	6881000000	6633000000	6040900000	7898800000	7753500000	7236900000
P62266	P62266	8	8	8	40S ribosomal protein S23	RPS23	1	49.7	49.7	49.7	15.807	143	0	94.889	By MS/MS	By MS/MS	By MS/MS	By MS/MS	By MS/MS	By MS/MS	By MS/MS	By MS/MS	6673200000	7143900000	5213900000	5562600000	5815700000	5810500000	7519400000	6275400000
P62269	P62269	18	18	18	40S ribosomal protein S18	RPS18	1	65.8	65.8	65.8	17.718	152	0	73.637	By MS/MS	By MS/MS	By MS/MS	By MS/MS	By MS/MS	By MS/MS	By MS/MS	By MS/MS	11058000000	11648000000	9709500000	9001900000	9673400000	9727300000	12307000000	10593000000
P62273	P62273	4	4	4	40S ribosomal protein S29	RPS29	1	48.2	48.2	48.2	6.6767	56	0	10.39	By MS/MS	By MS/MS	By MS/MS	By MS/MS	By MS/MS	By MS/MS	By MS/MS	By MS/MS	2999500000	3715700000	2577000000	2085600000	2598500000	2617900000	3310500000	2622600000
P62277	P62277	16	16	16	40S ribosomal protein S13	RPS13	1	63.6	63.6	63.6	17.222	151	0	92.942	By MS/MS	By MS/MS	By MS/MS	By MS/MS	By MS/MS	By MS/MS	By MS/MS	By MS/MS	11009000000	11895000000	9957300000	8786600000	9105000000	10434000000	13644000000	10461000000
P62280	P62280	17	17	17	40S ribosomal protein S11	RPS11	1	70.3	70.3	70.3	18.431	158	0	94.281	By MS/MS	By MS/MS	By MS/MS	By MS/MS	By MS/MS	By MS/MS	By MS/MS	By MS/MS	10119000000	10822000000	8760100000	8412300000	9105800000	9103900000	11788000000	11084000000
P62304	P62304	5	5	5	Small nuclear ribonucleoprotein E	SNRPE	1	69.6	69.6	69.6	10.803	92	0	64.097	By MS/MS	By MS/MS	By MS/MS	By MS/MS	By MS/MS	By MS/MS	By MS/MS	By MS/MS	2032400000	2186800000	1450200000	1727300000	1387400000	1678100000	1569300000	1684400000
P62306	P62306	4	4	4	Small nuclear ribonucleoprotein F	SNRPF	1	41.9	41.9	41.9	9.7251	86	0	62.194	By MS/MS	By MS/MS	By MS/MS	By MS/MS	By MS/MS	By MS/MS	By MS/MS	By MS/MS	775180000	871700000	791910000	766740000	615590000	449530000	623890000	668420000
P62308;A8MWD9	P62308;A8MWD9	5;5	5;5	5;5	Small nuclear ribonucleoprotein G;Putative small nuclear ribonucleoprotein G-like protein 15	SNRPG;SNRPGP15	2	36.8	36.8	36.8	8.496	76	0	17.204	By MS/MS	By MS/MS	By MS/MS	By MS/MS	By MS/MS	By MS/MS	By MS/MS	By MS/MS	1557000000	1721000000	1339900000	1562000000	1217100000	1063800000	1484800000	1176400000
P62310	P62310	3	3	3	U6 snRNA-associated Sm-like protein LSm3	LSM3	1	40.2	40.2	40.2	11.845	102	0.00031162	6.853	By MS/MS	By MS/MS	By MS/MS	By MS/MS	By MS/MS	By MS/MS	By MS/MS	By MS/MS	279300000	279510000	234020000	214840000	186100000	215860000	215170000	213060000
P62312	P62312	3	3	3	U6 snRNA-associated Sm-like protein LSm6	LSM6	1	36.2	36.2	36.2	9.1275	80	0.00029516	5.6496	By MS/MS	By MS/MS	By MS/MS	By MS/MS	By MS/MS	By MS/MS	By MS/MS	By MS/MS	95243000	119830000	177220000	146110000	83481000	96830000	99158000	158300000
P62314	P62314	4	4	4	Small nuclear ribonucleoprotein Sm D1	SNRPD1	1	54.6	54.6	54.6	13.281	119	0	35.984	By MS/MS	By MS/MS	By MS/MS	By MS/MS	By MS/MS	By MS/MS	By MS/MS	By MS/MS	2864300000	3001500000	2105000000	2312600000	2199500000	2934200000	3714700000	2842000000
P62316	P62316	10	10	10	Small nuclear ribonucleoprotein Sm D2	SNRPD2	1	67.8	67.8	67.8	13.527	118	0	93.856	By MS/MS	By MS/MS	By MS/MS	By MS/MS	By MS/MS	By MS/MS	By MS/MS	By MS/MS	3969400000	4514700000	3666600000	2980500000	2707500000	2379800000	2825800000	3357300000
P62318	P62318	5	5	5	Small nuclear ribonucleoprotein Sm D3	SNRPD3	1	53.2	53.2	53.2	13.916	126	0	127.67	By MS/MS	By MS/MS	By MS/MS	By MS/MS	By MS/MS	By MS/MS	By MS/MS	By MS/MS	2159700000	2507800000	2132800000	1930000000	1961500000	2430300000	2531200000	2295000000
P62328	P62328	10	10	8	Thymosin beta-4;Hematopoietic system regulatory peptide	TMSB4X	1	93.2	93.2	88.6	5.0526	44	0	83.825	By MS/MS	By MS/MS	By MS/MS	By MS/MS	By MS/MS	By MS/MS	By MS/MS	By MS/MS	983790000	1061800000	1863000000	758780000	1581400000	747360000	838580000	791880000
P62330	P62330	4	4	4	ADP-ribosylation factor 6	ARF6	1	32.6	32.6	32.6	20.082	175	0	11.212	By MS/MS	By MS/MS	By MS/MS	By MS/MS	By MS/MS	By MS/MS	By MS/MS	By MS/MS	207150000	306070000	261380000	209840000	208870000	160310000	180270000	220790000
P62333	P62333	22	22	22	26S protease regulatory subunit 10B	PSMC6	1	67.1	67.1	67.1	44.172	389	0	172.32	By MS/MS	By MS/MS	By MS/MS	By MS/MS	By MS/MS	By MS/MS	By MS/MS	By MS/MS	2143700000	2368900000	1813400000	1506400000	1652600000	1803200000	2535200000	2014900000
P62424	P62424	23	23	23	60S ribosomal protein L7a	RPL7A	1	60.5	60.5	60.5	29.995	266	0	323.31	By MS/MS	By MS/MS	By MS/MS	By MS/MS	By MS/MS	By MS/MS	By MS/MS	By MS/MS	14656000000	15405000000	12061000000	10715000000	12213000000	12887000000	15109000000	12710000000
P62487	P62487	5	5	5	DNA-directed RNA polymerase II subunit RPB7	POLR2G	1	34.9	34.9	34.9	19.294	172	0	14.092	By MS/MS	By MS/MS	By MS/MS	By MS/MS	By MS/MS	By matching	By MS/MS	By MS/MS	43558000	101720000	83898000	51302000	64593000	24236000	50015000	73441000
P62495	P62495	22	22	22	Eukaryotic peptide chain release factor subunit 1	ETF1	1	56.5	56.5	56.5	49.03	437	0	145.29	By MS/MS	By MS/MS	By MS/MS	By MS/MS	By MS/MS	By MS/MS	By MS/MS	By MS/MS	2094500000	2518700000	2095600000	1931300000	2220700000	2595000000	1933100000	2437800000
P62633	P62633	14	14	14	Cellular nucleic acid-binding protein	CNBP	1	67.2	67.2	67.2	19.463	177	0	171.61	By MS/MS	By MS/MS	By MS/MS	By MS/MS	By MS/MS	By MS/MS	By MS/MS	By MS/MS	2999500000	3246800000	3004100000	2583400000	3035200000	2789200000	3219200000	3247100000
P62699	P62699	2	2	2	Protein yippee-like 5	YPEL5	1	21.5	21.5	21.5	13.841	121	0.00032563	8.0108	By MS/MS	By MS/MS	By MS/MS	By MS/MS	By MS/MS	By MS/MS	By MS/MS	By MS/MS		24035000	29556000		13128000	27554000		10250000
P62701;Q8TD47;P22090	P62701	29;13;12	29;13;12	29;13;12	40S ribosomal protein S4, X isoform	RPS4X	3	74.9	74.9	74.9	29.597	263	0	228.79	By MS/MS	By MS/MS	By MS/MS	By MS/MS	By MS/MS	By MS/MS	By MS/MS	By MS/MS	21574000000	20826000000	18500000000	16361000000	19381000000	19254000000	21448000000	20201000000
P62750	P62750	16	16	15	60S ribosomal protein L23a	RPL23A	1	52.6	52.6	52.6	17.695	156	0	87.956	By MS/MS	By MS/MS	By MS/MS	By MS/MS	By MS/MS	By MS/MS	By MS/MS	By MS/MS	10293000000	10512000000	8920300000	7594200000	8988500000	8411200000	10347000000	8960500000
P62753	P62753	23	23	23	40S ribosomal protein S6	RPS6	1	55.8	55.8	55.8	28.68	249	0	186.94	By MS/MS	By MS/MS	By MS/MS	By MS/MS	By MS/MS	By MS/MS	By MS/MS	By MS/MS	11207000000	11541000000	9414600000	8742900000	10219000000	10848000000	14008000000	11343000000
P62760	P62760	5	5	5	Visinin-like protein 1	VSNL1	1	31.9	31.9	31.9	22.142	191	0	29.186	By MS/MS	By MS/MS	By MS/MS	By matching	By MS/MS	By MS/MS	By MS/MS	By MS/MS		60349000	11813000	7961100	234110000	136140000	243760000	271430000
P62805	P62805	15	15	15	Histone H4	HIST1H4A	1	62.1	62.1	62.1	11.367	103	0	138.41	By MS/MS	By MS/MS	By MS/MS	By MS/MS	By MS/MS	By MS/MS	By MS/MS	By MS/MS	84784000000	80832000000	75666000000	47193000000	82612000000	68933000000	87861000000	85580000000
P62820;P59190	P62820	15;1	15;1	7;0	Ras-related protein Rab-1A	RAB1A	2	76.1	76.1	38.5	22.677	205	0	210.68	By MS/MS	By MS/MS	By MS/MS	By MS/MS	By MS/MS	By MS/MS	By MS/MS	By MS/MS	3608900000	3876600000	3189700000	2514700000	2895600000	2657800000	3195800000	2964300000
P62826	P62826	17	17	17	GTP-binding nuclear protein Ran	RAN	1	53.7	53.7	53.7	24.423	216	0	176.69	By MS/MS	By MS/MS	By MS/MS	By MS/MS	By MS/MS	By MS/MS	By MS/MS	By MS/MS	13914000000	14654000000	11916000000	10288000000	10589000000	10831000000	12876000000	12439000000
P62829	P62829	13	13	13	60S ribosomal protein L23	RPL23	1	67.9	67.9	67.9	14.865	140	0	82.752	By MS/MS	By MS/MS	By MS/MS	By MS/MS	By MS/MS	By MS/MS	By MS/MS	By MS/MS	5971200000	6359900000	6025500000	5069400000	5543900000	5765300000	9241200000	6282500000
P62834	P62834	10	2	2	Ras-related protein Rap-1A	RAP1A	1	52.7	15.2	15.2	20.987	184	0.00032884	8.3055	By matching	By MS/MS	By MS/MS	By MS/MS	By MS/MS	By MS/MS	By matching	By MS/MS	31531000	35611000	57247000	54424000	67694000	61609000	29322000	77763000
P62841	P62841	8	8	8	40S ribosomal protein S15	RPS15	1	46.9	46.9	46.9	17.04	145	0	78.155	By MS/MS	By MS/MS	By MS/MS	By MS/MS	By MS/MS	By MS/MS	By MS/MS	By MS/MS	7654100000	8346200000	6713700000	6242300000	7269700000	6578800000	9333600000	8115500000
P62847	P62847	7	7	7	40S ribosomal protein S24	RPS24	1	41.4	41.4	41.4	15.423	133	0	40.235	By MS/MS	By MS/MS	By MS/MS	By MS/MS	By MS/MS	By MS/MS	By MS/MS	By MS/MS	2836900000	3256200000	2794700000	2569300000	3077100000	2924000000	3433900000	3401900000
P62851	P62851	11	11	11	40S ribosomal protein S25	RPS25	1	55.2	55.2	55.2	13.742	125	0	56.341	By MS/MS	By MS/MS	By MS/MS	By MS/MS	By MS/MS	By MS/MS	By MS/MS	By MS/MS	4431900000	4861800000	4214300000	3887000000	3707800000	4851500000	4742000000	4355800000
P62854;Q5JNZ5	P62854;Q5JNZ5	5;4	5;4	5;4	40S ribosomal protein S26;Putative 40S ribosomal protein S26-like 1	RPS26;RPS26P11	2	39.1	39.1	39.1	13.015	115	0	39.454	By MS/MS	By MS/MS	By MS/MS	By MS/MS	By MS/MS	By MS/MS	By MS/MS	By MS/MS	5383100000	5186300000	4509200000	4579500000	4534600000	4862600000	5653600000	4524600000
[truncated: 2,363 more rows]
