# Supplementary material for: Tryptophanyl-Transfer RNA Synthetase Is Involved in a Negative Feedback Loop Mitigating Interferon-γ-Induced Gene Expression
Source: Cells. 2024 Jan 17;13(2):180. doi: 10.3390/cells13020180 (PMC10813977; doi:10.3390/cells13020180)
Supplement: Supplementary file 1 [file cells-13-00180-s001.zip › Supplementary_table_S3.xlsx]

## Sheet: Feuil1
Protein IDs	Majority protein IDs	Peptide counts (all)	Peptide counts (razor+unique)	Peptide counts (unique)	Protein names	Gene names	Number of proteins	Sequence coverage [%]	Unique + razor sequence coverage [%]	Unique sequence coverage [%]	Mol. weight [kDa]	Sequence length	Sequence lengths	Q-value	Score	Identification type EV+INF_1	Identification type EV+INF_2	Identification type EV+INF_3	Identification type WARS+INF_1	Identification type WARS+INF_2	Identification type WARS+INF_3	Intensity EV+INF_1	Intensity EV+INF_2	Intensity EV+INF_3	Intensity WARS+INF_1	Intensity WARS+INF_2	Intensity WARS+INF_3
A0A075B6K5;P80748	A0A075B6K5;P80748	1;1	1;1	1;1	Ig lambda chain V-III region LOI	IGLV3-9	2	13.9	13.9	13.9	12.332	115	115;117	0.008658	7.7543	By MS/MS						7288700	0	0	0	0	0
A2NJV5;A0A0A0MRZ7;A0A075B6S2;A0A075B6S6;A0A075B6P5;A0A087WW87;P06310;P01615;P01614;A0A0C4DH68	A2NJV5;A0A0A0MRZ7;A0A075B6S2;A0A075B6S6;A0A075B6P5;A0A087WW87;P06310;P01615;P01614	4;4;4;2;2;2;2;2;2;1	4;4;4;2;2;2;2;2;2;1	4;4;4;2;2;2;2;2;2;1	Ig kappa chain V-II region RPMI 6410;Ig kappa chain V-II region FR;Ig kappa chain V-II region Cum	IGKV A18;IGKV2D-26;IGKV2D-29;IGKV2D-30;IGKV2D-28;IGKV2-40	10	19.2	19.2	19.2	13.085	120	120;120;120;120;120;121;120;120;121;120	0	86.211	By MS/MS	By MS/MS	By MS/MS	By MS/MS	By MS/MS	By MS/MS	71013000000	57383000	77297000	4327200000	513460000	46721000000
A0A0A0MS14	A0A0A0MS14	1	1	1		IGHV1-45	1	9.4	9.4	9.4	13.508	117	117	0.0097879	6.9017	By MS/MS					By MS/MS	12107000	0	0	0	0	8265500
A0A0C4DH25;P01619	A0A0C4DH25;P01619	1;1	1;1	1;1	Ig kappa chain V-III region B6	IGKV3D-20	2	13.8	13.8	13.8	12.515	116	116;116	0	13.002	By MS/MS						44285000	0	0	0	0	0
A6NIE6	A6NIE6	1	1	1	Putative RRN3-like protein RRN3P2	RRN3P2	1	3.2	3.2	3.2	38.034	340	340	0.0098039	6.9124	By MS/MS	By MS/MS	By matching	By MS/MS	By MS/MS	By MS/MS	213060000	82054000	29032000	76610000	131170000	39321000
P62308;A8MWD9	P62308;A8MWD9	3;3	3;3	3;3	Small nuclear ribonucleoprotein G;Putative small nuclear ribonucleoprotein G-like protein 15	SNRPG;SNRPGP15	2	26.3	26.3	26.3	8.496	76	76;76	0	21.37	By MS/MS	By MS/MS	By MS/MS	By matching	By matching	By matching	92056000	67855000	19883000	26425000	30619000	8232800
Q13765;E9PAV3	Q13765;E9PAV3	2;2	2;2	2;2	Nascent polypeptide-associated complex subunit alpha;Nascent polypeptide-associated complex subunit alpha, muscle-specific form	NACA	2	13.5	13.5	13.5	23.384	215	215;2078	0	16.062	By MS/MS		By matching	By matching			16539000	0	8163500	4362500	0	0
E9PRG8	E9PRG8	1	1	1	Uncharacterized protein C11orf98	C11orf98	1	10.7	10.7	10.7	13.798	122	122	0.0089445	10.074	By MS/MS	By MS/MS	By MS/MS	By matching	By matching		58954000	45220000	21727000	4457900	11045000	0
O00139	O00139	6	6	6	Kinesin-like protein KIF2A	KIF2A	1	7.1	7.1	7.1	79.954	706	706	0	45.514	By matching	By MS/MS	By MS/MS				22897000	31665000	7117900	0	0	0
O00148;Q13838	O00148;Q13838	14;9	14;9	14;9	ATP-dependent RNA helicase DDX39A;Spliceosome RNA helicase DDX39B	DDX39A;DDX39B	2	43.6	43.6	43.6	49.129	427	427;428	0	149	By MS/MS	By MS/MS	By MS/MS	By MS/MS	By MS/MS	By MS/MS	28842000	26806000	11183000	234950000	446690000	185340000
O00154	O00154	7	7	7	Cytosolic acyl coenzyme A thioester hydrolase	ACOT7	1	25.5	25.5	25.5	41.796	380	380	0	55.828	By matching	By matching	By matching	By MS/MS	By MS/MS	By MS/MS	5674200	3648800	1706100	78080000	61540000	22279000
O00178	O00178	4	4	4	GTP-binding protein 1	GTPBP1	1	7.6	7.6	7.6	72.453	669	669	0	30.377	By MS/MS	By MS/MS	By MS/MS				22051000	15683000	6469900	0	0	0
O00189	O00189	4	4	4	AP-4 complex subunit mu-1	AP4M1	1	10.6	10.6	10.6	49.976	453	453	0	24.952	By matching	By MS/MS	By MS/MS	By matching	By matching		14789000	17754000	11659000	2806100	9823100	0
O00231	O00231	3	3	3	26S proteasome non-ATPase regulatory subunit 11	PSMD11	1	8.5	8.5	8.5	47.463	422	422	0	18.122	By matching		By matching	By matching	By MS/MS	By matching	3300800	0	5113300	15284000	18263000	3059600
O00232	O00232	1	1	1	26S proteasome non-ATPase regulatory subunit 12	PSMD12	1	2.9	2.9	2.9	52.904	456	456	0.0086655	7.7969	By MS/MS	By matching		By MS/MS	By matching	By matching	1801100	2486600	0	7838300	16444000	8315300
O00299	O00299	4	4	4	Chloride intracellular channel protein 1	CLIC1	1	22.4	22.4	22.4	26.922	241	241	0	24.254	By MS/MS	By MS/MS	By MS/MS		By matching		11053000	9149600	3947500	0	10265000	0
O00303	O00303	5	5	5	Eukaryotic translation initiation factor 3 subunit F	EIF3F	1	20.2	20.2	20.2	37.563	357	357	0	63.675	By MS/MS	By MS/MS	By MS/MS	By MS/MS	By MS/MS		46444000	38975000	24745000	13698000	30381000	0
O00410	O00410	4	4	4	Importin-5	IPO5	1	5	5	5	123.63	1097	1097	0	45.448	By MS/MS	By MS/MS	By MS/MS	By MS/MS	By MS/MS		3497300	3745200	1062200	1450900	1788800	0
O00411	O00411	2	2	2	DNA-directed RNA polymerase, mitochondrial	POLRMT	1	2.1	2.1	2.1	138.62	1230	1230	0.0038168	11.845	By matching	By matching	By matching				3091700	2040200	952290	0	0	0
O00425	O00425	17	17	15	Insulin-like growth factor 2 mRNA-binding protein 3	IGF2BP3	1	37.8	37.8	33.9	63.704	579	579	0	257.76	By MS/MS	By MS/MS	By MS/MS	By matching	By MS/MS	By matching	390350000	287500000	115260000	17188000	55297000	3571000
O00442	O00442	1	1	1	RNA 3-terminal phosphate cyclase	RTCA	1	3.8	3.8	3.8	39.336	366	366	0	18.083	By MS/MS	By MS/MS	By matching		By MS/MS		3320500	0	533710	0	7111100	0
O00483	O00483	2	2	2	Cytochrome c oxidase subunit NDUFA4	NDUFA4	1	22.2	22.2	22.2	9.3697	81	81	0.0038023	11.793			By matching	By MS/MS	By MS/MS	By MS/MS	0	0	3404600	40173000	44204000	20069000
O00505	O00505	4	4	3	Importin subunit alpha-4	KPNA3	1	9.8	9.8	7.1	57.81	521	521	0	26.537	By MS/MS	By matching	By MS/MS	By matching	By matching		21715000	14249000	10139000	5996000	9796400	0
O00541	O00541	8	8	8	Pescadillo homolog	PES1	1	15.3	15.3	15.3	68.002	588	588	0	48.928	By MS/MS	By MS/MS	By MS/MS	By matching	By matching		82403000	49748000	22761000	840620	5760900	0
O00566	O00566	4	4	4	U3 small nucleolar ribonucleoprotein protein MPP10	MPHOSPH10	1	9.4	9.4	9.4	78.863	681	681	0	27.259	By MS/MS	By MS/MS	By MS/MS				39617000	27258000	5355200	0	0	0
O00567	O00567	19	19	19	Nucleolar protein 56	NOP56	1	43.1	43.1	43.1	66.049	594	594	0	229.57	By MS/MS	By MS/MS	By MS/MS	By matching	By MS/MS	By matching	434060000	212900000	98956000	4806300	47067000	1771100
O00571;O15523;Q9NQI0	O00571;O15523	35;25;2	34;24;2	34;24;2	ATP-dependent RNA helicase DDX3X;ATP-dependent RNA helicase DDX3Y	DDX3X;DDX3Y	3	62.4	60.7	60.7	73.243	662	662;660;724	0	323.31	By MS/MS	By MS/MS	By MS/MS	By MS/MS	By MS/MS	By MS/MS	1423200000	1328600000	516100000	121060000	301670000	74290000
O00622	O00622	3	3	3	Protein CYR61	CYR61	1	9.7	9.7	9.7	42.026	381	381	0	17.218	By matching	By MS/MS		By matching		By matching	12493000	21966000	0	14619000	0	82913000
O00629	O00629	4	3	3	Importin subunit alpha-3	KPNA4	1	14	11.3	11.3	57.886	521	521	0	16.695	By matching	By matching	By matching	By matching	By matching		5159100	0	1998700	0	63224000	0
O00743	O00743	2	2	2	Serine/threonine-protein phosphatase 6 catalytic subunit;Serine/threonine-protein phosphatase 6 catalytic subunit, N-terminally processed	PPP6C	1	7.2	7.2	7.2	35.144	305	305	0.0081448	10.708	By MS/MS	By matching	By matching	By matching			5262900	9268000	2275600	2297500	0	0
O14579	O14579	9	9	9	Coatomer subunit epsilon	COPE	1	37.3	37.3	37.3	34.482	308	308	0	100.62	By MS/MS	By MS/MS	By MS/MS	By MS/MS	By MS/MS	By matching	78323000	81254000	35533000	34327000	60851000	2308100
P47813;O14602	P47813;O14602	1;1	1;1	1;1	Eukaryotic translation initiation factor 1A, X-chromosomal;Eukaryotic translation initiation factor 1A, Y-chromosomal	EIF1AX;EIF1AY	2	11.1	11.1	11.1	16.46	144	144;144	0.0088261	8.8433	By matching		By matching				3299400	0	2274000	0	0	0
O14744	O14744	18	18	18	Protein arginine N-methyltransferase 5;Protein arginine N-methyltransferase 5, N-terminally processed	PRMT5	1	29.4	29.4	29.4	72.683	637	637	0	184.47	By MS/MS	By MS/MS	By MS/MS	By MS/MS	By MS/MS	By MS/MS	668230000	578100000	273590000	158400000	248850000	18182000
O14802	O14802	5	5	5	DNA-directed RNA polymerase III subunit RPC1	POLR3A	1	4.6	4.6	4.6	155.64	1390	1390	0	35.661	By MS/MS	By MS/MS	By MS/MS				7788200	25806000	6447700	0	0	0
O14818;Q8TAA3	O14818;Q8TAA3	6;3	6;3	6;3	Proteasome subunit alpha type-7;Proteasome subunit alpha type-7-like	PSMA7;PSMA8	2	32.7	32.7	32.7	27.887	248	248;256	0	56.308	By matching	By matching	By matching	By MS/MS	By MS/MS	By matching	13255000	7375700	3299000	43583000	70409000	10337000
O14828	O14828	2	2	2	Secretory carrier-associated membrane protein 3	SCAMP3	1	9.2	9.2	9.2	38.287	347	347	0	44.743				By MS/MS	By MS/MS	By matching	0	0	0	22816000	23622000	5897800
O14879	O14879	3	3	3	Interferon-induced protein with tetratricopeptide repeats 3	IFIT3	1	6.9	6.9	6.9	55.984	490	490	0	25.18			By matching	By MS/MS	By MS/MS	By MS/MS	0	0	2848400	17643000	15331000	3696800
P19105;O14950;P24844	P19105;O14950;P24844	5;5;3	5;5;3	5;5;3	Myosin regulatory light chain 12A;Myosin regulatory light chain 12B;Myosin regulatory light polypeptide 9	MYL12A;MYL12B;MYL9	3	33.9	33.9	33.9	19.794	171	171;172;172	0	38.647	By MS/MS	By MS/MS	By matching	By matching	By matching		36603000	38786000	13670000	15537000	9660800	0
O14979	O14979	8	7	7	Heterogeneous nuclear ribonucleoprotein D-like	HNRNPDL	1	18.6	16.7	16.7	46.437	420	420	0	50.701	By MS/MS	By MS/MS	By MS/MS	By matching	By matching	By matching	151010000	133680000	58024000	8475500	19315000	24332000
O14980	O14980	3	3	3	Exportin-1	XPO1	1	4.6	4.6	4.6	123.38	1071	1071	0	34.736				By MS/MS	By MS/MS	By matching	0	0	0	3210000	31143000	9099200
O15020	O15020	13	3	3	Spectrin beta chain, non-erythrocytic 2	SPTBN2	1	5.3	1.2	1.2	271.32	2390	2390	0	17.614	By MS/MS	By MS/MS	By matching	By matching	By MS/MS	By matching	1275300000	1124200000	48441000	996620000	1367900000	366070000
O15042	O15042	15	15	15	U2 snRNP-associated SURP motif-containing protein	U2SURP	1	16.8	16.8	16.8	118.29	1029	1029	0	101.67	By MS/MS	By MS/MS	By MS/MS	By matching	By matching		172300000	110480000	54747000	4366800	13549000	0
O15084;Q8N8A2	O15084	5;1	5;1	5;1	Serine/threonine-protein phosphatase 6 regulatory ankyrin repeat subunit A	ANKRD28	2	7.5	7.5	7.5	112.96	1053	1053;993	0	30.112	By matching	By MS/MS	By MS/MS	By matching		By matching	3950700	16543000	6267200	2794300	0	1334100
O15116	O15116	1	1	1	U6 snRNA-associated Sm-like protein LSm1	LSM1	1	12	12	12	15.179	133	133	0.0097245	6.8457		By matching	By matching				0	5188500	908800	0	0	0
O15143	O15143	3	3	3	Actin-related protein 2/3 complex subunit 1B	ARPC1B	1	12.6	12.6	12.6	40.949	372	372	0	23.373							0	0	0	0	0	0
O15144	O15144	1	1	1	Actin-related protein 2/3 complex subunit 2	ARPC2	1	4.7	4.7	4.7	34.333	300	300	0.0097482	6.8573							0	0	0	0	0	0
O15145	O15145	1	1	1	Actin-related protein 2/3 complex subunit 3	ARPC3	1	6.2	6.2	6.2	20.546	178	178	0.0086133	7.5716							0	0	0	0	0	0
O15160	O15160	9	9	9	DNA-directed RNA polymerases I and III subunit RPAC1	POLR1C	1	35	35	35	39.249	346	346	0	119.37	By MS/MS	By MS/MS	By matching	By matching	By matching	By matching	64801000	53237000	18389000	7275600	10783000	3407700
O15226	O15226	2	2	2	NF-kappa-B-repressing factor	NKRF	1	3.8	3.8	3.8	77.672	690	690	0.002893	12.014	By MS/MS	By matching	By matching		By matching		13803000	7939600	4454500	0	2109600	0
O15269	O15269	1	1	1	Serine palmitoyltransferase 1	SPTLC1	1	3	3	3	52.743	473	473	0	13.006				By MS/MS			0	0	0	6222400	0	0
O15305	O15305	1	1	1	Phosphomannomutase 2	PMM2	1	8.1	8.1	8.1	28.082	246	246	0.009764	6.8705	By matching				By MS/MS		2670100	0	0	0	2520800	0
O15371	O15371	3	3	3	Eukaryotic translation initiation factor 3 subunit D	EIF3D	1	6.8	6.8	6.8	63.972	548	548	0	24.012	By matching	By matching	By matching	By MS/MS	By matching		47117000	49379000	24948000	22350000	14279000	0
O15372	O15372	4	4	4	Eukaryotic translation initiation factor 3 subunit H	EIF3H	1	14.8	14.8	14.8	39.93	352	352	0	32.803	By MS/MS	By MS/MS	By matching	By MS/MS	By matching		3846100	9549400	5773200	4526900	2167700	0
O15446	O15446	2	2	2	DNA-directed RNA polymerase I subunit RPA34	CD3EAP	1	7.5	7.5	7.5	54.985	510	510	0	15.648	By MS/MS	By MS/MS	By MS/MS				28740000	21782000	12394000	0	0	0
O43143;O60231;Q14562	O43143	33;1;1	33;1;1	33;1;1	Pre-mRNA-splicing factor ATP-dependent RNA helicase DHX15	DHX15	3	43.4	43.4	43.4	90.932	795	795;1041;1220	0	298.28	By MS/MS	By MS/MS	By MS/MS	By MS/MS	By MS/MS	By matching	835840000	794560000	317870000	40697000	160770000	21387000
O43172	O43172	7	7	7	U4/U6 small nuclear ribonucleoprotein Prp4	PRPF4	1	20.7	20.7	20.7	58.449	522	522	0	48.161	By MS/MS	By MS/MS	By MS/MS	By matching	By matching		27490000	29123000	8810900	3573800	5801100	0
O43175	O43175	4	4	4	D-3-phosphoglycerate dehydrogenase	PHGDH	1	8.3	8.3	8.3	56.65	533	533	0	30.607	By matching	By matching	By matching	By MS/MS	By MS/MS	By MS/MS	1753600	1111100	1176300	45908000	80894000	23029000
O43242	O43242	5	5	5	26S proteasome non-ATPase regulatory subunit 3	PSMD3	1	12.4	12.4	12.4	60.977	534	534	0	49.647	By matching		By matching	By MS/MS	By MS/MS	By MS/MS	2864000	0	2109900	18541000	83664000	13107000
O43290	O43290	11	11	11	U4/U6.U5 tri-snRNP-associated protein 1	SART1	1	17.8	17.8	17.8	90.254	800	800	0	130.44	By MS/MS	By MS/MS	By MS/MS				125130000	88070000	32690000	0	0	0
O43390	O43390	26	20	20	Heterogeneous nuclear ribonucleoprotein R	HNRNPR	1	41.5	32.4	32.4	70.942	633	633	0	323.31	By MS/MS	By MS/MS	By MS/MS	By matching	By MS/MS	By matching	798340000	467370000	250290000	23541000	70579000	5136000
O43395	O43395	3	3	3	U4/U6 small nuclear ribonucleoprotein Prp3	PRPF3	1	6	6	6	77.528	683	683	0	22.044	By MS/MS	By MS/MS	By MS/MS				9519800	17788000	5577500	0	0	0
O43447	O43447	2	2	2	Peptidyl-prolyl cis-trans isomerase H	PPIH	1	10.7	10.7	10.7	19.208	177	177	0.0037987	11.79	By matching	By matching	By matching				5277200	8751900	1155600	0	0	0
O43548	O43548	3	3	3	Protein-glutamine gamma-glutamyltransferase 5	TGM5	1	6.5	6.5	6.5	80.777	720	720	0	41.296	By matching			By matching	By matching		3995400	0	0	5563300	5220900	0
O43660	O43660	6	6	6	Pleiotropic regulator 1	PLRG1	1	16.1	16.1	16.1	57.193	514	514	0	53.057	By MS/MS	By MS/MS	By matching		By matching		73542000	39374000	18369000	0	2238400	0
O43684	O43684	3	3	3	Mitotic checkpoint protein BUB3	BUB3	1	11.3	11.3	11.3	37.154	328	328	0	19.927	By MS/MS	By MS/MS	By matching		By MS/MS		9073100	16375000	8570300	0	5324700	0
O43707;P12814;P35609;Q08043	O43707	15;6;3;2	15;6;3;2	14;6;3;2	Alpha-actinin-4	ACTN4	4	20	20	18.8	104.85	911	911;892;894;901	0	103.67	By MS/MS	By MS/MS	By MS/MS	By MS/MS	By MS/MS	By matching	67014000	56973000	45397000	39182000	71875000	20468000
O43790;Q14533;A6NCN2;Q9NSB4	O43790;Q14533;A6NCN2	25;21;14;1	24;20;14;1	5;3;1;0	Keratin, type II cuticular Hb6;Keratin, type II cuticular Hb1;Putative keratin-87 protein	KRT86;KRT81;KRT87P	4	53.1	51.6	14.2	53.5	486	486;505;255;513	0	312.02	By matching	By matching	By matching	By MS/MS	By MS/MS	By matching	12223000	14304000	5927600	36313000	26266000	13626000
O43818	O43818	2	2	2	U3 small nucleolar RNA-interacting protein 2	RRP9	1	4.4	4.4	4.4	51.84	475	475	0	12.15	By matching	By matching	By MS/MS				7251900	10004000	4256100	0	0	0
O60232	O60232	3	3	3	Sjoegren syndrome/scleroderma autoantigen 1	SSSCA1	1	26.6	26.6	26.6	21.474	199	199	0	25.807	By matching			By MS/MS	By matching	By matching	29101000	0	0	15495000	8322400	3415000
O60293	O60293	3	3	3	Zinc finger C3H1 domain-containing protein	ZFC3H1	1	1.8	1.8	1.8	226.35	1989	1989	0	17.761	By matching	By MS/MS	By matching	By matching	By matching	By matching	3451500	7004300	5485100	4201800	13527000	6141600
O60502	O60502	8	8	8	Protein O-GlcNAcase	MGEA5	1	10	10	10	102.91	916	916	0	50.541	By matching	By MS/MS	By MS/MS	By matching	By matching	By matching	13436000	15325000	7963600	8725200	7029300	2291100
O60506	O60506	29	29	23	Heterogeneous nuclear ribonucleoprotein Q	SYNCRIP	1	47.4	47.4	38	69.602	623	623	0	323.31	By MS/MS	By MS/MS	By MS/MS	By MS/MS	By MS/MS	By matching	2305300000	1618300000	768110000	164780000	449590000	41930000
O60762	O60762	4	4	4	Dolichol-phosphate mannosyltransferase subunit 1	DPM1	1	22.3	22.3	22.3	29.634	260	260	0	41.416	By matching	By MS/MS	By MS/MS	By MS/MS	By MS/MS	By MS/MS	15380000	9345000	775040	25262000	72093000	35603000
O60783	O60783	2	2	2	28S ribosomal protein S14, mitochondrial	MRPS14	1	21.9	21.9	21.9	15.139	128	128	0	18.988	By MS/MS	By MS/MS	By MS/MS				13844000	15026000	7284200	0	0	0
P62807;O60814;P57053	P62807;O60814;P57053	11;11;10	11;11;10	0;0;0	Histone H2B type 1-C/E/F/G/I;Histone H2B type 1-K;Histone H2B type F-S	HIST1H2BC;HIST1H2BK;H2BFS	3	65.9	65.9	0	13.906	126	126;126;126	0	211.8	By MS/MS	By MS/MS	By MS/MS	By MS/MS	By MS/MS	By MS/MS	3214000000	1983000000	826670000	262210000	311080000	155140000
O60832	O60832	8	8	8	H/ACA ribonucleoprotein complex subunit 4	DKC1	1	21.2	21.2	21.2	57.673	514	514	0	64.164	By MS/MS	By MS/MS	By MS/MS		By matching		48556000	12519000	11175000	0	11399000	0
O60841	O60841	6	6	6	Eukaryotic translation initiation factor 5B	EIF5B	1	8.3	8.3	8.3	138.83	1220	1220	0	51.592	By MS/MS	By MS/MS	By MS/MS		By matching		41361000	52271000	13158000	0	7149600	0
O60884	O60884	7	7	7	DnaJ homolog subfamily A member 2	DNAJA2	1	23.1	23.1	23.1	45.745	412	412	0	54.756	By matching	By matching	By matching	By MS/MS	By MS/MS	By MS/MS	12171000	5672300	766510	87136000	122880000	56866000
O75083	O75083	10	10	10	WD repeat-containing protein 1	WDR1	1	23.8	23.8	23.8	66.193	606	606	0	66.661	By matching	By matching	By matching	By MS/MS	By MS/MS	By MS/MS	9022100	8611500	1675500	129760000	122700000	66071000
O75223	O75223	3	3	3	Gamma-glutamylcyclotransferase	GGCT	1	16.5	16.5	16.5	21.007	188	188	0	16.721		By matching	By matching		By matching		0	3452500	797880	0	11563000	0
O75306	O75306	2	2	2	NADH dehydrogenase [ubiquinone] iron-sulfur protein 2, mitochondrial	NDUFS2	1	6.3	6.3	6.3	52.545	463	463	0.0047259	11.678				By matching	By MS/MS	By matching	0	0	0	8709900	11048000	5698200
O75342	O75342	1	1	1	Arachidonate 12-lipoxygenase, 12R-type	ALOX12B	1	1.7	1.7	1.7	80.355	701	701	0.0098684	6.9503	By MS/MS			By matching			9157100	0	0	6187400	0	0
O95670;O75348	O95670;O75348	1;1	1;1	1;1	V-type proton ATPase subunit G 2;V-type proton ATPase subunit G 1	ATP6V1G2;ATP6V1G1	2	13.6	13.6	13.6	13.604	118	118;118	0	18.707							0	0	0	0	0	0
O75352	O75352	2	2	2	Mannose-P-dolichol utilization defect 1 protein	MPDU1	1	8.1	8.1	8.1	26.638	247	247	0.0055762	11.4				By MS/MS	By MS/MS	By MS/MS	0	0	0	17606000	22494000	10052000
O75367	O75367	2	2	2	Core histone macro-H2A.1	H2AFY	1	13.2	13.2	13.2	39.617	372	372	0	15.928	By matching	By matching	By matching		By matching		5059000	7578300	1819200	0	37564000	0
O75369	O75369	24	17	17	Filamin-B	FLNB	1	11.1	9.2	9.2	278.16	2602	2602	0	134.98	By MS/MS	By MS/MS	By MS/MS	By MS/MS	By MS/MS	By MS/MS	42395000	50867000	16500000	87628000	169670000	9399300
O75475	O75475	1	1	1	PC4 and SFRS1-interacting protein	PSIP1	1	2.1	2.1	2.1	60.103	530	530	0.0084246	7.215	By MS/MS	By matching	By matching				5489000	4259000	2170000	0	0	0
O94905;O75477	O94905;O75477	2;2	2;2	2;2	Erlin-2;Erlin-1	ERLIN2;ERLIN1	2	7.1	7.1	7.1	37.839	339	339;346	0	12.935				By MS/MS	By MS/MS	By MS/MS	0	0	0	24299000	26850000	6240300
O75506	O75506	3	3	3	Heat shock factor-binding protein 1	HSBP1	1	72.4	72.4	72.4	8.5435	76	76	0	58.208	By MS/MS	By matching					12157000	3116500	0	0	0	0
O75533	O75533	35	35	35	Splicing factor 3B subunit 1	SF3B1	1	36.9	36.9	36.9	145.83	1304	1304	0	323.31	By MS/MS	By MS/MS	By MS/MS	By matching	By MS/MS	By matching	612540000	558330000	170220000	36610000	118950000	16300000
O75534	O75534	9	9	9	Cold shock domain-containing protein E1	CSDE1	1	15.2	15.2	15.2	88.884	798	798	0	81.548	By MS/MS	By MS/MS	By matching		By matching		21255000	27644000	6452700	0	4859000	0
O75607	O75607	1	1	1	Nucleoplasmin-3	NPM3	1	9	9	9	19.343	178	178	0	34.267		By MS/MS	By MS/MS				0	3396100	1687800	0	0	0
O75643	O75643	37	37	37	U5 small nuclear ribonucleoprotein 200 kDa helicase	SNRNP200	1	21.8	21.8	21.8	244.5	2136	2136	0	323.31	By MS/MS	By MS/MS	By MS/MS	By MS/MS	By MS/MS	By matching	178570000	144350000	90433000	47925000	108470000	14073000
O75683	O75683	2	2	2	Surfeit locus protein 6	SURF6	1	12.2	12.2	12.2	41.45	361	361	0	14.803							0	0	0	0	0	0
O75688;P35813	O75688	22;2	22;2	22;2	Protein phosphatase 1B	PPM1B	2	52.6	52.6	52.6	52.642	479	479;382	0	272.08	By MS/MS	By MS/MS	By MS/MS	By MS/MS	By MS/MS	By MS/MS	1309200000	1010300000	505580000	585110000	1056900000	179850000
O75691	O75691	3	3	3	Small subunit processome component 20 homolog	UTP20	1	1.1	1.1	1.1	318.38	2785	2785	0	17.164	By MS/MS		By matching		By matching		9724700	0	1674300	0	1510500	0
O75746	O75746	6	2	2	Calcium-binding mitochondrial carrier protein Aralar1	SLC25A12	1	10.8	4.4	4.4	74.761	678	678	0	12.682	By matching	By matching	By matching	By MS/MS	By MS/MS	By matching	11754000	5046100	8439500	12577000	16897000	8699700
O75817	O75817	1	1	1	Ribonuclease P protein subunit p20	POP7	1	10.7	10.7	10.7	15.651	140	140	0.0097087	6.8239							0	0	0	0	0	0
O75821	O75821	4	4	4	Eukaryotic translation initiation factor 3 subunit G	EIF3G	1	15	15	15	35.611	320	320	0	33.278	By MS/MS	By MS/MS	By MS/MS	By MS/MS	By MS/MS		22618000	23373000	10386000	10430000	2033900	0
O75832	O75832	1	1	1	26S proteasome non-ATPase regulatory subunit 10	PSMD10	1	9.7	9.7	9.7	24.428	226	226	0.0088106	8.7986					By MS/MS		0	0	0	0	4902000	0
O75874	O75874	3	3	3	Isocitrate dehydrogenase [NADP] cytoplasmic	IDH1	1	9.4	9.4	9.4	46.659	414	414	0	19.108	By matching		By matching	By MS/MS	By MS/MS	By matching	7530800	0	1322600	9510000	20093000	9683000
O75880	O75880	2	2	2	Protein SCO1 homolog, mitochondrial	SCO1	1	12	12	12	33.814	301	301	0.0047037	11.592		By matching		By MS/MS	By matching		0	1257100	0	16926000	19530000	0
O75915	O75915	1	1	1	PRA1 family protein 3	ARL6IP5	1	10.6	10.6	10.6	21.614	188	188	1	-2				By MS/MS		By matching	0	0	0	2070500000	0	70364000
O75934	O75934	4	4	4	Pre-mRNA-splicing factor SPF27	BCAS2	1	34.2	34.2	34.2	26.131	225	225	0	52.132	By MS/MS	By MS/MS	By matching				29908000	16733000	1035400	0	0	0
O75940	O75940	1	1	1	Survival of motor neuron-related-splicing factor 30	SMNDC1	1	11.3	11.3	11.3	26.711	238	238	0.0072926	10.965							0	0	0	0	0	0
O76011	O76011	13	2	2	Keratin, type I cuticular Ha4	KRT34	1	30.5	4.8	4.8	49.423	436	436	0	12.474	By matching	By matching		By matching	By matching	By matching	0	0	0	0	0	0
O76013	O76013	6	3	3	Keratin, type I cuticular Ha6	KRT36	1	13.1	7.7	7.7	52.247	467	467	0	22.996	By matching	By matching	By matching	By matching	By matching	By matching	0	0	0	10445000	24989000	12952000
O76021	O76021	17	17	17	Ribosomal L1 domain-containing protein 1	RSL1D1	1	39	39	39	54.972	490	490	0	191.12	By MS/MS	By MS/MS	By MS/MS	By matching	By MS/MS	By matching	254400000	196810000	89258000	2898100	24228000	5273500
O76094	O76094	8	8	8	Signal recognition particle subunit SRP72	SRP72	1	17.1	17.1	17.1	74.605	671	671	0	73.837	By MS/MS	By MS/MS	By matching		By matching	By matching	62057000	97086000	82465000	0	27615000	6484800
O94776;Q9BTC8;Q13330	O94776	7;1;1	7;1;1	7;1;1	Metastasis-associated protein MTA2	MTA2	3	15	15	15	75.022	668	668;594;715	0	48.983	By MS/MS	By MS/MS	By MS/MS				14503000	21065000	11756000	0	0	0
O94906	O94906	9	9	9	Pre-mRNA-processing factor 6	PRPF6	1	12.2	12.2	12.2	106.92	941	941	0	64.925		By matching	By MS/MS	By matching	By matching	By matching	0	12618000	10594000	9354100	10858000	3095000
O94915;Q5TBA9	O94915	40;3	40;3	40;3	Protein furry homolog-like	FRYL	2	15.1	15.1	15.1	339.59	3013	3013;3013	0	323.31	By MS/MS	By MS/MS	By MS/MS	By matching	By matching		322840000	354870000	167770000	1431100	19694000	0
O94964	O94964	2	2	2	Protein SOGA1;N-terminal form;C-terminal 80 kDa form	SOGA1	1	1.4	1.4	1.4	159.76	1423	1423	0.009009	10.601	By matching	By matching	By matching	By MS/MS	By matching		39478000	54851000	55586000	15843000	25822000	0
O95218	O95218	3	3	3	Zinc finger Ran-binding domain-containing protein 2	ZRANB2	1	11.2	11.2	11.2	37.404	330	330	0	19.157	By matching	By matching	By matching				5991900	5407500	2538400	0	0	0
O95232	O95232	2	2	2	Luc7-like protein 3	LUC7L3	1	7.4	7.4	7.4	51.466	432	432	0	21.641	By MS/MS	By MS/MS					4843500	9626400	0	0	0	0
O95400	O95400	2	2	2	CD2 antigen cytoplasmic tail-binding protein 2	CD2BP2	1	8.5	8.5	8.5	37.646	341	341	0.0038095	11.809	By matching	By matching	By matching				8184400	4201700	3041500	0	0	0
O95433	O95433	7	7	7	Activator of 90 kDa heat shock protein ATPase homolog 1	AHSA1	1	26.6	26.6	26.6	38.274	338	338	0	121.83		By matching	By matching	By MS/MS	By MS/MS	By MS/MS	0	6543600	2665400	156090000	296750000	78714000
O95573;O60488	O95573	3;1	3;1	3;1	Long-chain-fatty-acid--CoA ligase 3	ACSL3	2	6	6	6	80.419	720	720;711	0	23.511				By MS/MS	By MS/MS		0	0	0	7804500	19366000	0
O95714;Q9BVR0	O95714	24;2	24;2	24;2	E3 ubiquitin-protein ligase HERC2	HERC2	2	6.4	6.4	6.4	527.22	4834	4834;1158	0	169.38	By matching	By matching	By MS/MS	By MS/MS	By MS/MS	By MS/MS	35652000	6354900	3837100	81425000	196680000	24691000
O95782	O95782	13	13	9	AP-2 complex subunit alpha-1	AP2A1	1	20.7	20.7	14.5	107.54	977	977	0	110.72	By MS/MS	By MS/MS	By MS/MS		By matching		64192000	52537000	11344000	0	7730900	0
O95786	O95786	14	14	14	Probable ATP-dependent RNA helicase DDX58	DDX58	1	17.3	17.3	17.3	106.6	925	925	0	107.09	By MS/MS	By MS/MS	By MS/MS	By MS/MS	By MS/MS	By MS/MS	122200000	92975000	97785000	49090000	50328000	18934000
O95793	O95793	17	17	15	Double-stranded RNA-binding protein Staufen homolog 1	STAU1	1	36	36	33.4	63.182	577	577	0	138.06	By MS/MS	By MS/MS	By MS/MS		By matching		444220000	397030000	183480000	0	40031000	0
O95816	O95816	11	11	11	BAG family molecular chaperone regulator 2	BAG2	1	59.7	59.7	59.7	23.772	211	211	0	125.42	By matching	By MS/MS	By MS/MS	By MS/MS	By MS/MS	By MS/MS	4464700	2523100	2886100	466420000	769370000	191680000
O95831	O95831	10	10	10	Apoptosis-inducing factor 1, mitochondrial	AIFM1	1	19.6	19.6	19.6	66.9	613	613	0	76.293				By MS/MS	By MS/MS	By MS/MS	0	0	0	140190000	95587000	55897000
O95881	O95881	5	5	5	Thioredoxin domain-containing protein 12	TXNDC12	1	31.4	31.4	31.4	19.206	172	172	0	32.241	By MS/MS	By matching	By matching	By MS/MS	By MS/MS	By MS/MS	175310000	13210000	9494400	19991000	15405000	116610000
O96008	O96008	7	7	7	Mitochondrial import receptor subunit TOM40 homolog	TOMM40	1	26.9	26.9	26.9	37.893	361	361	0	100.01	By matching	By matching		By MS/MS	By MS/MS	By MS/MS	10843000	1616700	0	103550000	64797000	84257000
P00167	P00167	1	1	1	Cytochrome b5	CYB5A	1	25.4	25.4	25.4	15.33	134	134	0	18.722							0	0	0	0	0	0
P00338;Q6ZMR3;P07864	P00338	5;2;2	3;0;0	3;0;0	L-lactate dehydrogenase A chain	LDHA	3	13	8.7	8.7	36.688	332	332;332;332	0	25.432	By matching	By matching	By matching	By MS/MS	By matching	By matching	0	7153200	2159700	16446000	13052000	0
P00491	P00491	3	3	3	Purine nucleoside phosphorylase	PNP	1	11.8	11.8	11.8	32.118	289	289	0	17.83							0	0	0	0	0	0
P00505	P00505	1	1	1	Aspartate aminotransferase, mitochondrial	GOT2	1	4	4	4	47.517	430	430	0.0088652	9.2397							0	0	0	0	0	0
P00558;P07205	P00558	10;2	10;2	10;2	Phosphoglycerate kinase 1	PGK1	2	32.1	32.1	32.1	44.614	417	417;417	0	125.03	By matching			By matching	By matching	By matching	4311700	0	0	11420000	16504000	6761500
P00738;P00739	P00738	4;1	4;1	4;1	Haptoglobin;Haptoglobin alpha chain;Haptoglobin beta chain	HP	2	7.6	7.6	7.6	45.205	406	406;348	0	29.272							0	0	0	0	0	0
P00747	P00747	3	3	3	Plasminogen;Plasmin heavy chain A;Activation peptide;Angiostatin;Plasmin heavy chain A, short form;Plasmin light chain B	PLG	1	4.4	4.4	4.4	90.568	810	810	0	22.148	By matching						7022900	0	0	0	0	0
P01008	P01008	3	3	3	Antithrombin-III	SERPINC1	1	6	6	6	52.602	464	464	0	19.722							0	0	0	0	0	0
P01009	P01009	2	2	2	Alpha-1-antitrypsin;Short peptide from AAT	SERPINA1	1	5.3	5.3	5.3	46.736	418	418	0.0028791	11.954	By MS/MS						13041000	0	0	0	0	0
P01023	P01023	7	7	5	Alpha-2-macroglobulin	A2M	1	5	5	3.5	163.29	1474	1474	0	45.291		By matching		By matching	By matching	By matching	0	1713900	0	22173000	7979700	10960000
P01024	P01024	19	19	19	Complement C3;Complement C3 beta chain;C3-beta-c;Complement C3 alpha chain;C3a anaphylatoxin;Acylation stimulating protein;Complement C3b alpha chain;Complement C3c alpha chain fragment 1;Complement C3dg fragment;Complement C3g fragment;Complement C3d fragment;Complement C3f fragment;Complement C3c alpha chain fragment 2	C3	1	14.5	14.5	14.5	187.15	1663	1663	0	221.81	By MS/MS	By matching	By matching	By matching	By matching	By matching	149330000	12031000	15701000	13412000	27021000	11252000
P01036	P01036	2	1	1	Cystatin-S	CST4	1	20.6	12.8	12.8	16.214	141	141	0.0046773	11.485	By matching	By MS/MS		By matching	By matching		0	1812500	0	0	0	0
P01037	P01037	2	2	1	Cystatin-SN	CST1	1	20.6	20.6	12.8	16.387	141	141	0	38.032	By matching	By MS/MS		By matching	By matching		9792400	18199000	0	7067400	10982000	0
P01040	P01040	7	7	7	Cystatin-A;Cystatin-A, N-terminally processed	CSTA	1	83.7	83.7	83.7	11.006	98	98	0	92.593	By MS/MS	By MS/MS	By MS/MS	By MS/MS	By MS/MS	By matching	75045000	179720000	39449000	80432000	76197000	26123000
P01042	P01042	1	1	1	Kininogen-1;Kininogen-1 heavy chain;T-kinin;Bradykinin;Lysyl-bradykinin;Kininogen-1 light chain;Low molecular weight growth-promoting factor	KNG1	1	1.4	1.4	1.4	71.957	644	644	0.0083752	7.1182							0	0	0	0	0	0
P01591	P01591	1	1	1	Immunoglobulin J chain	IGJ	1	7.5	7.5	7.5	18.098	159	159	0.0088339	8.8913		By MS/MS		By matching	By MS/MS		0	27368000	0	8200400	12820000	0
P01833	P01833	3	3	3	Polymeric immunoglobulin receptor;Secretory component	PIGR	1	7.2	7.2	7.2	83.283	764	764	0	19.175	By matching	By MS/MS					7559300	26966000	0	0	0	0
P01834;P0DOX7	P01834;P0DOX7	6;5	6;5	6;5	Ig kappa chain C region	IGKC	2	81.3	81.3	81.3	11.765	107	107;214	0	323.31	By MS/MS	By MS/MS		By matching	By MS/MS	By matching	588380000	54728000	0	5003100	9149900	39027000
P0DOX5;P01857	P0DOX5;P01857	11;11	11;11	4;4	Ig gamma-1 chain C region	IGHG1	2	37.4	37.4	13.8	48.986	449	449;330	0	143.27	By MS/MS	By matching	By matching	By matching	By matching		1148800000	70484000	5495300	3292700	10736000	0
P01859	P01859	9	5	3	Ig gamma-2 chain C region	IGHG2	1	35.3	23	13.8	35.9	326	326	0	48.258	By MS/MS	By matching	By matching	By matching	By matching	By MS/MS	280310000	0	0	9239900	0	72190000
P01860	P01860	7	1	1	Ig gamma-3 chain C region	IGHG3	1	20.7	3.2	3.2	41.287	377	377	1	-2	By matching	By matching	By matching		By matching		0	0	0	0	0	0
P01871;P0DOX6	P01871;P0DOX6	2;1	2;1	2;1	Ig mu chain C region	IGHM	2	5.3	5.3	5.3	49.439	453	453;576	0	19.306							0	0	0	0	0	0
P01876;P01877	P01876	4;1	4;1	3;0	Ig alpha-1 chain C region	IGHA1	2	14.4	14.4	11.6	37.654	353	353;340	0	47.942	By MS/MS	By MS/MS	By MS/MS	By MS/MS	By MS/MS	By matching	72902000	184860000	12690000	41997000	82436000	5392600
P01892;P10316;P30459;P10314;P01891;Q95604;Q31612;Q09160;P30512;P30457;P30456;P30453;P30450;P18462;P16190;P16189	P01892;P10316;P30459;P10314;P01891;Q95604;Q31612;Q09160;P30512;P30457;P30456;P30453;P30450;P18462;P16190;P16189	6;5;4;4;4;4;3;3;3;3;3;3;3;3;3;3	6;5;4;4;4;4;3;3;3;3;3;3;3;3;3;3	1;1;0;0;1;0;0;0;0;0;0;0;0;0;0;0	HLA class I histocompatibility antigen, A-2 alpha chain;HLA class I histocompatibility antigen, A-69 alpha chain;HLA class I histocompatibility antigen, A-74 alpha chain;HLA class I histocompatibility antigen, A-32 alpha chain;HLA class I histocompatibility antigen, A-68 alpha chain;HLA class I histocompatibility antigen, Cw-17 alpha chain;HLA class I histocompatibility antigen, B-73 alpha chain;…	HLA-A;HLA-C;HLA-B	16	20.5	20.5	3.6	40.921	365	365;365;365;365;365;372;363;365;365;365;365;365;365;365;365;365	0	73.174				By MS/MS	By MS/MS	By MS/MS	0	0	0	37873000	62474000	39545000
P02042;P69892;P69891;P02100	P02042	9;1;1;1	2;0;0;0	2;0;0;0	Hemoglobin subunit delta	HBD	4	54.4	15	15	16.055	147	147;147;147;147	0	15.93	By matching	By matching	By matching	By matching	By matching		0	0	0	0	0	0
P02452	P02452	2	2	2	Collagen alpha-1(I) chain	COL1A1	1	2.3	2.3	2.3	138.94	1464	1464	0	33.353							0	0	0	0	0	0
P02533;Q8N1A0	P02533	59;1	53;1	26;0	Keratin, type I cytoskeletal 14	KRT14	2	76.3	72.5	45.1	51.561	472	472;295	0	323.31	By MS/MS	By MS/MS	By MS/MS	By MS/MS	By MS/MS	By MS/MS	10598000000	3695100000	1546700000	2442200000	8216900000	1950100000
P02538	P02538	70	54	2	Keratin, type II cytoskeletal 6A	KRT6A	1	70.6	59	3.5	60.044	564	564	0	323.31	By MS/MS	By MS/MS	By MS/MS	By MS/MS	By MS/MS	By MS/MS	8257900000	3736000000	1697900000	1845100000	5664900000	1581700000
P02545;REV__Q5VX52	P02545	89;1	89;1	87;1	Prelamin-A/C;Lamin-A/C	LMNA	2	85.1	85.1	85.1	74.139	664	664;437	0	323.31	By MS/MS	By MS/MS	By MS/MS	By MS/MS	By MS/MS	By MS/MS	126000000000	100670000000	65866000000	30724000000	42277000000	6552400000
P02671	P02671	6	6	6	Fibrinogen alpha chain;Fibrinopeptide A;Fibrinogen alpha chain	FGA	1	10.2	10.2	10.2	94.972	866	866	0	36.17				By matching			0	0	0	3650800	0	0
P02679	P02679	6	6	6	Fibrinogen gamma chain	FGG	1	16.1	16.1	16.1	51.511	453	453	0	43.894							0	0	0	0	0	0
P02748	P02748	1	1	1	Complement component C9;Complement component C9a;Complement component C9b	C9	1	2.1	2.1	2.1	63.173	559	559	0.0098361	6.9229							0	0	0	0	0	0
P02749	P02749	2	2	2	Beta-2-glycoprotein 1	APOH	1	3.5	3.5	3.5	38.298	345	345	0	54.117							0	0	0	0	0	0
P02751	P02751	1	1	1	Fibronectin;Anastellin;Ugl-Y1;Ugl-Y2;Ugl-Y3	FN1	1	0.5	0.5	0.5	262.62	2386	2386	0.0083542	7.0983							0	0	0	0	0	0
P02753	P02753	3	3	3	Retinol-binding protein 4;Plasma retinol-binding protein(1-182);Plasma retinol-binding protein(1-181);Plasma retinol-binding protein(1-179);Plasma retinol-binding protein(1-176)	RBP4	1	22.4	22.4	22.4	23.01	201	201	0	62.952		By matching					0	1707200	0	0	0	0
P02763;P19652	P02763	3;1	3;1	3;1	Alpha-1-acid glycoprotein 1	ORM1	2	18.4	18.4	18.4	23.511	201	201;201	0	33.692	By MS/MS						134550000	0	0	0	0	0
P02765	P02765	4	4	4	Alpha-2-HS-glycoprotein;Alpha-2-HS-glycoprotein chain A;Alpha-2-HS-glycoprotein chain B	AHSG	1	7.1	7.1	7.1	39.324	367	367	0	75.789	By MS/MS	By matching	By matching	By matching	By MS/MS	By MS/MS	23964000	13115000	8448000	3764300	29794000	15155000
P02768	P02768	39	39	39	Serum albumin	ALB	1	60.9	60.9	60.9	69.366	609	609	0	323.31	By MS/MS	By MS/MS	By MS/MS	By MS/MS	By MS/MS	By MS/MS	246070000	386950000	50050000	172520000	168920000	43477000
P02771	P02771	6	6	6	Alpha-fetoprotein	AFP	1	7.4	7.4	7.4	68.677	609	609	0	110.99	By matching	By matching					7097800	2283600	0	0	0	0
P02774	P02774	10	10	10	Vitamin D-binding protein	GC	1	16	16	16	52.963	474	474	0	323.31		By matching	By matching				0	1390200	2299600	0	0	0
P02787	P02787	5	5	5	Serotransferrin	TF	1	4.3	4.3	4.3	77.063	698	698	0	36.652							0	0	0	0	0	0
P02788	P02788	9	9	9	Lactotransferrin;Lactoferricin-H;Kaliocin-1;Lactoferroxin-A;Lactoferroxin-B;Lactoferroxin-C	LTF	1	12.7	12.7	12.7	78.181	710	710	0	63.963	By MS/MS	By MS/MS	By MS/MS	By MS/MS	By MS/MS	By MS/MS	53140000	71540000	17207000	39697000	46646000	13438000
Q8N339;P80297;P04732;P02795;P13640	Q8N339;P80297;P04732;P02795;P13640	2;2;2;2;2	2;2;2;2;2	2;2;2;2;2	Metallothionein-1M;Metallothionein-1X;Metallothionein-1E;Metallothionein-2;Metallothionein-1G	MT1M;MT1X;MT1E;MT2A;MT1G	5	21.3	21.3	21.3	6.1103	61	61;61;61;61;62	0	45.808	By MS/MS	By matching	By matching		By MS/MS		6651600	3060200	1574300	0	7623600	0
P02808	P02808	1	1	1	Statherin	STATH	1	54.8	54.8	54.8	7.3044	62	62	0	27.365							0	0	0	0	0	0
P02814	P02814	2	2	2	Submaxillary gland androgen-regulated protein 3B;Peptide P-A;Peptide D1A	SMR3B	1	65.8	65.8	65.8	8.1875	79	79	0	19.541		By MS/MS					0	2345900	0	0	0	0
P04004	P04004	1	1	1	Vitronectin;Vitronectin V65 subunit;Vitronectin V10 subunit;Somatomedin-B	VTN	1	3.1	3.1	3.1	54.305	478	478	0.0091286	7.0274	By MS/MS	By MS/MS	By MS/MS		By matching		15473000	17237000	3206000	0	4492700	0
P04040	P04040	11	11	11	Catalase	CAT	1	30.6	30.6	30.6	59.755	527	527	0	90.167	By MS/MS	By MS/MS	By MS/MS	By MS/MS	By MS/MS	By matching	100270000	27815000	9056800	18545000	19883000	4673700
P04075	P04075	8	8	8	Fructose-bisphosphate aldolase A	ALDOA	1	23.6	23.6	23.6	39.42	364	364	0	96.366	By matching	By matching	By matching	By MS/MS	By matching	By matching	7760900	14093000	3962600	5705900	14025000	8656800
P04080	P04080	2	2	2	Cystatin-B	CSTB	1	24.5	24.5	24.5	11.139	98	98	0	13.803	By MS/MS	By MS/MS	By MS/MS	By MS/MS	By MS/MS		54482000	30455000	15752000	47910000	40913000	0
P04083	P04083	9	9	9	Annexin A1	ANXA1	1	31.2	31.2	31.2	38.714	346	346	0	141.2	By MS/MS	By MS/MS	By MS/MS			By matching	88735000	60873000	14175000	0	0	3102800
P04259	P04259	67	3	3	Keratin, type II cytoskeletal 6B	KRT6B	1	69	4.8	4.8	60.066	564	564	0	89.469	By MS/MS	By MS/MS	By MS/MS	By MS/MS	By MS/MS	By MS/MS	144180000	30828000	24240000	6658400	110510000	33186000
P04264	P04264	77	71	68	Keratin, type II cytoskeletal 1	KRT1	1	77.5	77.5	77.5	66.038	644	644	0	323.31	By MS/MS	By MS/MS	By MS/MS	By MS/MS	By MS/MS	By MS/MS	132110000000	50815000000	21797000000	65687000000	115070000000	23962000000
P04350	P04350	20	1	0	Tubulin beta-4A chain	TUBB4A	1	55	4.1	0	49.585	444	444	0.0088731	9.3667	By matching	By matching	By matching	By MS/MS	By MS/MS	By MS/MS	0	0	0	10847000	19742000	6108400
P04406	P04406	16	16	15	Glyceraldehyde-3-phosphate dehydrogenase	GAPDH	1	61.8	61.8	59.7	36.053	335	335	0	323.31	By MS/MS	By MS/MS	By MS/MS	By MS/MS	By MS/MS	By MS/MS	255150000	114950000	49025000	153530000	341580000	191280000
P30455;P30443;P04439;P30447;P16188;P13746;P05534;Q29960;P30508;P30510;P30504	P30455;P30443;P04439;P30447;P16188;P13746;P05534;Q29960;P30508	5;5;5;4;4;4;4;4;4;2;2	1;1;1;1;1;1;1;1;1;1;1	0;0;0;0;0;0;0;0;0;0;0	HLA class I histocompatibility antigen, A-36 alpha chain;HLA class I histocompatibility antigen, A-1 alpha chain;HLA class I histocompatibility antigen, A-3 alpha chain;HLA class I histocompatibility antigen, A-23 alpha chain;HLA class I histocompatibility antigen, A-30 alpha chain;HLA class I histocompatibility antigen, A-11 alpha chain;HLA class I histocompatibility antigen, A-24 alpha chain;HL…	HLA-A;HLA-C	11	17	3.6	0	40.933	365	365;365;365;365;365;365;365;366;366;366;366	0.0091135	7.01				By MS/MS	By MS/MS	By MS/MS	0	0	0	10273000	13955000	6855200
P19961;P04745;P04746	P19961;P04745;P04746	8;8;7	8;8;7	8;8;7	Alpha-amylase 2B;Alpha-amylase 1;Pancreatic alpha-amylase	AMY2B;AMY1A;AMY2A	3	22.1	22.1	22.1	57.709	511	511;511;511	0	117.33		By matching	By matching	By matching			0	3897100	333970	1019800	0	0
P04792	P04792	10	10	10	Heat shock protein beta-1	HSPB1	1	56.1	56.1	56.1	22.782	205	205	0	199.5	By matching	By matching	By MS/MS	By matching	By matching	By matching	26756000	13414000	12944000	25888000	42408000	7696200
P04843	P04843	16	16	16	Dolichyl-diphosphooligosaccharide--protein glycosyltransferase subunit 1	RPN1	1	29.5	29.5	29.5	68.569	607	607	0	125.59	By matching	By MS/MS	By matching	By MS/MS	By MS/MS	By MS/MS	49363000	33552000	7240400	210440000	323520000	143340000
Q93077;Q7L7L0;P04908;Q96QV6;P16104;Q8IUE6;REV__Q8NB25	Q93077;Q7L7L0;P04908;Q96QV6;P16104	6;6;6;4;4;2;1	1;1;1;0;0;0;0	1;1;1;0;0;0;0	Histone H2A type 1-C;Histone H2A type 3;Histone H2A type 1-B/E;Histone H2A type 1-A;Histone H2AX	HIST1H2AC;HIST3H2A;HIST1H2AB;HIST1H2AA;H2AFX	7	35.4	8.5	8.5	14.105	130	130;130;130;131;143;130;1140	0.0087642	8.3421	By MS/MS	By MS/MS	By MS/MS	By matching	By matching	By matching	42280000	37885000	8994600	0	1999600	0
P05023;P13637;P50993;Q13733;P20648;P54707	P05023;P13637;P50993	10;5;5;2;2;2	10;5;5;2;2;2	10;5;5;2;2;2	Sodium/potassium-transporting ATPase subunit alpha-1;Sodium/potassium-transporting ATPase subunit alpha-3;Sodium/potassium-transporting ATPase subunit alpha-2	ATP1A1;ATP1A3;ATP1A2	6	12.3	12.3	12.3	112.89	1023	1023;1013;1020;1029;1035;1039	0	110.4				By MS/MS	By MS/MS	By matching	0	0	0	49298000	79520000	20852000
P05089	P05089	15	15	15	Arginase-1	ARG1	1	57.5	57.5	57.5	34.735	322	322	0	167.3	By MS/MS	By MS/MS	By MS/MS	By MS/MS	By MS/MS	By matching	171360000	83917000	14164000	53534000	95527000	19073000
P05109	P05109	6	6	6	Protein S100-A8;Protein S100-A8, N-terminally processed	S100A8	1	45.2	45.2	45.2	10.834	93	93	0	59.255	By MS/MS	By MS/MS	By MS/MS	By MS/MS	By MS/MS	By MS/MS	816740000	103270000	129440000	100750000	73314000	25144000
P05141;Q9H0C2	P05141	14;4	6;0	6;0	ADP/ATP translocase 2;ADP/ATP translocase 2, N-terminally processed	SLC25A5	2	39.6	19.5	19.5	32.852	298	298;315	0	93.245	By MS/MS	By MS/MS	By MS/MS	By MS/MS	By MS/MS	By MS/MS	87164000	82573000	37255000	391140000	532020000	163350000
P05156	P05156	1	1	1	Complement factor I;Complement factor I heavy chain;Complement factor I light chain	CFI	1	2.2	2.2	2.2	65.75	583	583	0.0089127	9.7858							0	0	0	0	0	0
P05161	P05161	4	4	4	Ubiquitin-like protein ISG15	ISG15	1	30.9	30.9	30.9	17.887	165	165	0	41.805	By MS/MS	By MS/MS	By matching	By MS/MS	By MS/MS	By MS/MS	42553000	32407000	13918000	117400000	153920000	115590000
P05198	P05198	20	20	20	Eukaryotic translation initiation factor 2 subunit 1	EIF2S1	1	60.6	60.6	60.6	36.112	315	315	0	293.4	By MS/MS	By MS/MS	By MS/MS	By MS/MS	By MS/MS	By matching	776110000	775230000	219740000	62164000	185790000	12476000
P05362	P05362	3	3	3	Intercellular adhesion molecule 1	ICAM1	1	7.7	7.7	7.7	57.825	532	532	0	22.89				By MS/MS	By MS/MS	By MS/MS	0	0	0	24934000	43329000	13499000
P05386	P05386	5	4	4	60S acidic ribosomal protein P1	RPLP1	1	94.7	79.8	79.8	11.514	114	114	0	323.31	By MS/MS	By MS/MS	By MS/MS	By MS/MS	By MS/MS	By MS/MS	1535000000	850650000	420070000	77120000	673790000	43327000
P05387	P05387	12	12	11	60S acidic ribosomal protein P2	RPLP2	1	97.4	97.4	82.6	11.665	115	115	0	323.31	By MS/MS	By MS/MS	By MS/MS	By MS/MS	By MS/MS	By MS/MS	5157900000	4860900000	2424500000	877690000	2199000000	202870000
P05388;Q8NHW5	P05388;Q8NHW5	17;11	17;11	17;11	60S acidic ribosomal protein P0;60S acidic ribosomal protein P0-like	RPLP0;RPLP0P6	2	53	53	53	34.273	317	317;317	0	323.31	By MS/MS	By MS/MS	By MS/MS	By MS/MS	By MS/MS	By MS/MS	5109000000	4443900000	1665100000	677410000	1518700000	307830000
P05452	P05452	2	2	2	Tetranectin	CLEC3B	1	16.3	16.3	16.3	22.537	202	202	0	42.129							0	0	0	0	0	0
P05455	P05455	3	3	3	Lupus La protein	SSB	1	10.8	10.8	10.8	46.836	408	408	0	18.005		By matching					0	2870200	0	0	0	0
P05543	P05543	1	1	1	Thyroxine-binding globulin	SERPINA7	1	2.4	2.4	2.4	46.324	415	415	0.0097324	6.8506							0	0	0	0	0	0
P05783	P05783	11	9	9	Keratin, type I cytoskeletal 18	KRT18	1	27.7	24	24	48.057	430	430	0	124.96	By MS/MS	By MS/MS	By MS/MS	By matching	By matching	By matching	88024000	71401000	37041000	11093000	8080400	0
P05787	P05787	21	8	8	Keratin, type II cytoskeletal 8	KRT8	1	28	18.8	18.8	53.704	483	483	0	53.63	By MS/MS	By MS/MS	By MS/MS	By matching	By matching	By matching	45603000	37303000	31302000	2955500	4742200	0
P06396	P06396	10	10	10	Gelsolin	GSN	1	13.9	13.9	13.9	85.696	782	782	0	136.37		By matching			By matching	By matching	0	11431000	0	0	4041100	4941700
P06454	P06454	3	3	3	Prothymosin alpha;Prothymosin alpha, N-terminally processed;Thymosin alpha-1	PTMA	1	17.1	17.1	17.1	12.203	111	111	0	44.139							0	0	0	0	0	0
P06576	P06576	11	11	11	ATP synthase subunit beta, mitochondrial	ATP5B	1	29.9	29.9	29.9	56.559	529	529	0	187.74	By matching	By matching		By MS/MS	By MS/MS	By MS/MS	9052100	3149300	0	78650000	130930000	19764000
P06702	P06702	9	9	9	Protein S100-A9	S100A9	1	56.1	56.1	56.1	13.242	114	114	0	133.58	By MS/MS	By MS/MS	By MS/MS	By MS/MS	By MS/MS	By MS/MS	1381700000	242010000	236350000	222030000	168610000	48163000
P06703	P06703	2	2	2	Protein S100-A6	S100A6	1	27.8	27.8	27.8	10.18	90	90	0	26.873	By MS/MS	By MS/MS	By MS/MS	By MS/MS	By MS/MS	By MS/MS	54767000	29864000	12904000	317570000	240710000	142430000
P06733;P13929	P06733	24;1	24;1	23;0	Alpha-enolase	ENO1	2	52.1	52.1	52.1	47.168	434	434;434	0	323.31	By MS/MS	By MS/MS	By MS/MS	By MS/MS	By MS/MS	By MS/MS	234260000	82581000	70524000	1208600000	1617600000	710640000
P06748	P06748	19	19	19	Nucleophosmin	NPM1	1	57.8	57.8	57.8	32.575	294	294	0	323.31	By MS/MS	By MS/MS	By MS/MS	By MS/MS	By MS/MS	By matching	5004800000	3300700000	1018600000	404230000	1050900000	161740000
P06753;P09493	P06753;P09493	10;5	10;5	4;0	Tropomyosin alpha-3 chain;Tropomyosin alpha-1 chain	TPM3;TPM1	2	35.4	35.4	14.4	32.95	285	285;284	0	78.232	By matching	By matching	By matching	By MS/MS	By MS/MS	By matching	39308000	10213000	13774000	16585000	26375000	12163000
Q16778;P06899	Q16778;P06899	10;10	2;2	0;0	Histone H2B type 2-E;Histone H2B type 1-J	HIST2H2BE;HIST1H2BJ	2	64.3	7.9	0	13.92	126	126;126	0	18.97	By MS/MS	By MS/MS	By MS/MS	By matching	By MS/MS	By matching	200620000	100870000	50816000	11328000	33470000	6917900
P07195	P07195	5	5	3	L-lactate dehydrogenase B chain	LDHB	1	16.8	16.8	12.6	36.638	334	334	0	40.473	By matching			By MS/MS	By MS/MS	By MS/MS	16477000	0	0	49278000	136780000	61345000
P07237	P07237	11	11	11	Protein disulfide-isomerase	P4HB	1	19.1	19.1	19.1	57.116	508	508	0	101.91	By matching	By matching	By matching	By MS/MS	By MS/MS	By matching	7807100	465450	1057700	24472000	26114000	11877000
P07305	P07305	6	6	6	Histone H1.0;Histone H1.0, N-terminally processed	H1F0	1	27.8	27.8	27.8	20.863	194	194	0	49.538	By MS/MS	By MS/MS	By MS/MS		By MS/MS		452300000	211190000	71160000	0	4165000	0
P07339	P07339	3	3	3	Cathepsin D;Cathepsin D light chain;Cathepsin D heavy chain	CTSD	1	9.5	9.5	9.5	44.552	412	412	0	33.336	By matching	By matching	By matching	By matching	By matching	By matching	14102000	13983000	5816600	12644000	17297000	2735000
P07355;A6NMY6	P07355;A6NMY6	17;12	17;12	17;12	Annexin A2;Putative annexin A2-like protein	ANXA2;ANXA2P2	2	52.5	52.5	52.5	38.604	339	339;339	0	323.31	By MS/MS	By MS/MS	By MS/MS	By MS/MS	By MS/MS	By MS/MS	697220000	256530000	125160000	463620000	729510000	218370000
P07437;A6NNZ2;Q9H4B7	P07437	27;8;5	7;0;0	6;0;0	Tubulin beta chain	TUBB	3	63.7	20.5	17.1	49.67	444	444;444;451	0	323.31	By MS/MS	By MS/MS	By MS/MS	By MS/MS	By MS/MS	By MS/MS	170070000	137650000	45212000	729380000	1884400000	306910000
P07476	P07476	5	5	5	Involucrin	IVL	1	9.6	9.6	9.6	68.478	585	585	0	32.205					By matching		0	0	0	0	3892300	0
P07477;Q8NHM4;P07478;Q9BYE2	P07477;Q8NHM4;P07478;Q9BYE2	2;1;1;1	2;1;1;1	2;1;1;1	Trypsin-1;Alpha-trypsin chain 1;Alpha-trypsin chain 2;Putative trypsin-6;Trypsin-2;Transmembrane protease serine 13	PRSS1;PRSS3P2;PRSS2;TMPRSS13	4	11.3	11.3	11.3	26.558	247	247;247;247;586	0	27.566	By MS/MS	By MS/MS	By MS/MS	By MS/MS	By MS/MS	By MS/MS	846890000	696640000	555110000	629730000	1430500000	533070000
P07737	P07737	5	5	5	Profilin-1	PFN1	1	35	35	35	15.054	140	140	0	34.183							0	0	0	0	0	0
P07814	P07814	2	2	2	Bifunctional glutamate/proline--tRNA ligase;Glutamate--tRNA ligase;Proline--tRNA ligase	EPRS	1	1.7	1.7	1.7	170.59	1512	1512	0	20.007							0	0	0	0	0	0
P07900;Q14568;Q58FG0;Q58FF6;Q58FG1	P07900	28;7;5;5;1	14;1;2;0;0	14;1;2;0;0	Heat shock protein HSP 90-alpha	HSP90AA1	5	35.5	19.4	19.4	84.659	732	732;343;334;505;418	0	177.06	By MS/MS	By MS/MS	By MS/MS	By MS/MS	By MS/MS	By MS/MS	50957000	42284000	23818000	267150000	368740000	144940000
P07910;P0DMR1;O60812;B7ZW38;B2RXH8;Q86SE5	P07910	12;5;5;5;5;1	12;5;5;5;5;1	12;5;5;5;5;1	Heterogeneous nuclear ribonucleoproteins C1/C2	HNRNPC	6	37.3	37.3	37.3	33.67	306	306;293;293;293;293;291	0	88.053	By MS/MS	By MS/MS	By MS/MS	By MS/MS	By MS/MS	By matching	510330000	431310000	243040000	24611000	87896000	10798000
P07919	P07919	2	2	2	Cytochrome b-c1 complex subunit 6, mitochondrial	UQCRH	1	29.7	29.7	29.7	10.739	91	91	0	33.554	By matching	By matching			By MS/MS	By matching	6553500	1208600	0	0	53681000	5644000
P07996	P07996	3	3	3	Thrombospondin-1	THBS1	1	2.8	2.8	2.8	129.38	1170	1170	0	19.334	By matching		By matching		By matching		4152100	0	1854000	0	1911400	0
P08123	P08123	2	2	2	Collagen alpha-2(I) chain	COL1A2	1	1.9	1.9	1.9	129.31	1366	1366	0	26.16							0	0	0	0	0	0
P61586;P08134	P61586;P08134	2;2	2;2	2;2	Transforming protein RhoA;Rho-related GTP-binding protein RhoC	RHOA;RHOC	2	13.5	13.5	13.5	21.768	193	193;193	0	13.63		By matching					0	14158000	0	0	0	0
P08195	P08195	20	20	20	4F2 cell-surface antigen heavy chain	SLC3A2	1	36.2	36.2	36.2	67.993	630	630	0	208.86	By MS/MS	By matching	By MS/MS	By MS/MS	By MS/MS	By MS/MS	11234000	11556000	1009700	530510000	1034200000	229920000
P08238;Q58FF7	P08238	36;14	36;14	20;5	Heat shock protein HSP 90-beta	HSP90AB1	2	49.4	49.4	31.5	83.263	724	724;597	0	323.31	By MS/MS	By MS/MS	By MS/MS	By MS/MS	By MS/MS	By MS/MS	142800000	174410000	76830000	2160300000	2504500000	965980000
P08559	P08559	3	3	3	Pyruvate dehydrogenase E1 component subunit alpha, somatic form, mitochondrial	PDHA1	1	7.7	7.7	7.7	43.295	390	390	0	18.34				By MS/MS	By MS/MS	By matching	0	0	0	23956000	29017000	6222900
P08574	P08574	1	1	1	Cytochrome c1, heme protein, mitochondrial	CYC1	1	3.7	3.7	3.7	35.422	325	325	0.008673	7.8442	By matching	By matching		By MS/MS	By MS/MS	By MS/MS	2891900	1927400	0	23283000	29190000	12051000
P08579	P08579	4	2	2	U2 small nuclear ribonucleoprotein B	SNRPB2	1	19.6	12.9	12.9	25.486	225	225	0	13.706	By MS/MS	By MS/MS	By matching	By matching	By matching	By matching	14739000	6608800	3537800	0	4568800	3342900
P08621	P08621	11	11	11	U1 small nuclear ribonucleoprotein 70 kDa	SNRNP70	1	27.7	27.7	27.7	51.556	437	437	0	72.178	By MS/MS	By MS/MS	By MS/MS	By matching	By MS/MS		221810000	139020000	68459000	19391000	44667000	0
P08670;P17661;P41219;P14136;Q16352;P07197;P07196	P08670	65;6;5;2;2;2;1	64;6;5;1;2;2;1	61;3;3;1;1;1;0	Vimentin	VIM	7	84.3	82.8	81.1	53.651	466	466;470;470;432;499;916;543	0	323.31	By MS/MS	By MS/MS	By MS/MS	By MS/MS	By MS/MS	By MS/MS	26639000000	21868000000	15930000000	1798600000	3620200000	467670000
P08708	P08708	12	12	12	40S ribosomal protein S17	RPS17	1	65.9	65.9	65.9	15.55	135	135	0	323.31	By MS/MS	By MS/MS	By MS/MS	By MS/MS	By MS/MS	By MS/MS	1583800000	1190100000	326310000	64977000	203630000	68514000
P08727	P08727	12	1	0	Keratin, type I cytoskeletal 19	KRT19	1	20.2	2.2	0	44.105	400	400	1	-2	By matching	By matching	By MS/MS	By matching	By matching	By matching	38143000	33272000	19531000	4991100	9015900	0
P08729	P08729	11	2	1	Keratin, type II cytoskeletal 7	KRT7	1	15.1	4.9	2.6	51.385	469	469	0	12.687	By matching	By matching	By matching	By matching	By matching	By matching	0	0	743000	0	0	0
P08754;P63096;P09471;P04899;P11488;P19087;A8MTJ3;P38405	P08754;P63096;P09471;P04899	3;2;2;2;1;1;1;1	3;2;2;2;1;1;1;1	2;1;1;1;0;0;0;0	Guanine nucleotide-binding protein G(k) subunit alpha;Guanine nucleotide-binding protein G(i) subunit alpha-1;Guanine nucleotide-binding protein G(o) subunit alpha;Guanine nucleotide-binding protein G(i) subunit alpha-2	GNAI3;GNAI1;GNAO1;GNAI2	8	10.7	10.7	7.6	40.532	354	354;354;354;355;350;354;354;381	0	30.078				By MS/MS	By MS/MS	By matching	0	0	0	29634000	39819000	13655000
P08779	P08779	50	29	29	Keratin, type I cytoskeletal 16	KRT16	1	78.6	56.4	56.4	51.267	473	473	0	323.31	By MS/MS	By MS/MS	By MS/MS	By MS/MS	By MS/MS	By MS/MS	1319600000	926190000	191990000	292650000	2679400000	642300000
P08865	P08865	10	10	10	40S ribosomal protein SA	RPSA	1	40.7	40.7	40.7	32.854	295	295	0	152.3	By MS/MS	By MS/MS	By MS/MS	By MS/MS	By MS/MS	By MS/MS	133020000	200310000	57292000	40212000	77920000	18205000
P09012	P09012	7	7	5	U1 small nuclear ribonucleoprotein A	SNRPA	1	29.4	29.4	24.1	31.279	282	282	0	68.494	By MS/MS	By MS/MS	By MS/MS	By matching	By MS/MS	By matching	236170000	159970000	51450000	29881000	39803000	2321100
P09211	P09211	2	2	2	Glutathione S-transferase P	GSTP1	1	17.1	17.1	17.1	23.356	210	210	0	18.805	By MS/MS	By MS/MS	By MS/MS	By matching			20499000	8618600	6526100	3061400	0	0
P09234	P09234	2	2	2	U1 small nuclear ribonucleoprotein C	SNRPC	1	18.9	18.9	18.9	17.394	159	159	0	21.613	By MS/MS	By MS/MS	By MS/MS		By MS/MS		39413000	29425000	17721000	0	9905400	0
P09382	P09382	8	8	8	Galectin-1	LGALS1	1	65.9	65.9	65.9	14.716	135	135	0	102.92	By matching	By matching	By matching	By MS/MS	By MS/MS	By MS/MS	50559000	24083000	9719100	84920000	254220000	71634000
P09429	P09429	1	1	1	High mobility group protein B1	HMGB1	1	6.5	6.5	6.5	24.893	215	215	0.0091438	7.0612							0	0	0	0	0	0
P09496	P09496	3	3	3	Clathrin light chain A	CLTA	1	14.9	14.9	14.9	27.076	248	248	0	17.725				By matching	By MS/MS		0	0	0	3675000	13739000	0
P09543	P09543	7	7	7	2,3-cyclic-nucleotide 3-phosphodiesterase	CNP	1	23.8	23.8	23.8	47.578	421	421	0	83.989	By MS/MS	By MS/MS	By matching	By MS/MS	By MS/MS	By MS/MS	29852000	15856000	3626100	16937000	39770000	36930000
P09651;Q32P51	P09651;Q32P51	25;16	24;15	23;14	Heterogeneous nuclear ribonucleoprotein A1;Heterogeneous nuclear ribonucleoprotein A1, N-terminally processed;Heterogeneous nuclear ribonucleoprotein A1-like 2	HNRNPA1;HNRNPA1L2	2	53.2	53.2	51.3	38.746	372	372;320	0	323.31	By MS/MS	By MS/MS	By MS/MS	By MS/MS	By MS/MS	By MS/MS	4581900000	3238700000	1362100000	299610000	817940000	129540000
P09661	P09661	3	3	3	U2 small nuclear ribonucleoprotein A	SNRPA1	1	16.5	16.5	16.5	28.415	255	255	0	93.951	By MS/MS	By MS/MS	By MS/MS				25919000	14360000	11719000	0	0	0
P09874	P09874	9	9	9	Poly [ADP-ribose] polymerase 1	PARP1	1	10.9	10.9	10.9	113.08	1014	1014	0	56.601	By matching	By MS/MS	By MS/MS	By matching	By matching	By matching	44363000	22855000	21058000	6736100	7831600	5604100
P09972	P09972	1	1	1	Fructose-bisphosphate aldolase C	ALDOC	1	6.3	6.3	6.3	39.455	364	364	0	40.367							0	0	0	0	0	0
P0C0L4;P0C0L5	P0C0L4;P0C0L5	5;4	5;4	5;4	Complement C4-A;Complement C4 beta chain;Complement C4-A alpha chain;C4a anaphylatoxin;C4b-A;C4d-A;Complement C4 gamma chain;Complement C4-B;Complement C4 beta chain;Complement C4-B alpha chain;C4a anaphylatoxin;C4b-B;C4d-B;Complement C4 gamma chain	C4A;C4B	2	3.1	3.1	3.1	192.78	1744	1744;1744	0	33.003	By MS/MS					By matching	15008000	0	0	0	0	2281500
Q71UI9;P0C0S5	Q71UI9;P0C0S5	4;4	2;2	2;2	Histone H2A.V;Histone H2A.Z	H2AFV;H2AFZ	2	31.2	18.8	18.8	13.509	128	128;128	0.00096805	12.078	By MS/MS	By matching	By matching	By matching	By matching	By matching	54143000	34164000	17294000	0	15853000	3683400
Q5DJT8;P0DMV2;P0DMV1;P0DMU9	Q5DJT8;P0DMV2;P0DMV1;P0DMU9	6;6;6;5	1;1;1;1	1;1;1;1	Cancer/testis antigen family 45 member A2;Cancer/testis antigen family 45 member A9;Cancer/testis antigen family 45 member A8;Cancer/testis antigen family 45 member A10	CT45A2;CT45A9;CT45A8;CT45A10	4	45	5.3	5.3	21.362	189	189;189;189;189	1	-2	By MS/MS	By matching	By matching	By matching	By matching		9484600	6451100	2275700	0	0	0
P0DMV9;P0DMV8	P0DMV9;P0DMV8	34;34	28;28	18;18	Heat shock 70 kDa protein 1B;Heat shock 70 kDa protein 1A	HSPA1B;HSPA1A	2	59.1	53.5	33.7	70.051	641	641;641	0	323.31	By MS/MS	By MS/MS	By MS/MS	By MS/MS	By MS/MS	By MS/MS	284860000	219560000	129060000	2220700000	2838900000	1177100000
P0DN76;Q01081;Q8WU68	P0DN76;Q01081;Q8WU68	4;4;3	4;4;3	4;4;3	Splicing factor U2AF 35 kDa subunit;Splicing factor U2AF 26 kDa subunit	U2AF1;U2AF1L4	3	14.6	14.6	14.6	27.872	240	240;240;220	0	34.776	By MS/MS	By MS/MS	By MS/MS	By matching	By matching	By matching	59591000	39858000	14044000	1724500	3318300	1330800
P0DOX2	P0DOX2	2	1	0			1	4.6	2.4	0	48.462	455	455	0.0097561	6.8584	By MS/MS	By matching		By matching	By matching		12809000	0	0	0	0	0
P0DOY3;P0DOY2;P0CF74;P0DOX8;A0M8Q6;P0CG04;B9A064	P0DOY3;P0DOY2;P0CF74;P0DOX8;A0M8Q6;P0CG04;B9A064	4;4;3;2;2;2;2	4;4;3;2;2;2;2	4;4;3;2;2;2;2	Ig lambda-6 chain C region;Ig lambda-7 chain C region;Ig lambda-1 chain C regions;Immunoglobulin lambda-like polypeptide 5	IGLC6;IGLC7;IGLC1;IGLL5	7	55.7	55.7	55.7	11.265	106	106;106;106;216;106;106;214	0	109.03	By MS/MS	By matching	By matching		By matching		293170000	39642000	1016600	0	4334700	0
P0DP25;P0DP24;P0DP23;P02585	P0DP25;P0DP24;P0DP23	5;5;5;1	5;5;5;1	4;4;4;0			4	33.6	33.6	28.9	16.837	149	149;149;149;160	0	165.37	By matching	By matching	By matching	By matching	By MS/MS	By matching	41471000	37184000	30711000	52549000	59836000	24623000
Q29940;P30685;P30498;P30495;P30493;P30492;P30491;P30490;P30484;P30464;P18465;P18464;P10319	Q29940;P30685;P30498;P30495;P30493;P30492;P30491;P30490;P30484;P30464;P18465;P18464;P10319	4;4;4;4;4;4;4;4;4;4;4;4;4	1;1;1;1;1;1;1;1;1;1;1;1;1	0;0;0;0;0;0;0;0;0;0;0;0;0	HLA class I histocompatibility antigen, B-59 alpha chain;HLA class I histocompatibility antigen, B-35 alpha chain;HLA class I histocompatibility antigen, B-78 alpha chain;HLA class I histocompatibility antigen, B-56 alpha chain;HLA class I histocompatibility antigen, B-55 alpha chain;HLA class I histocompatibility antigen, B-54 alpha chain;HLA class I histocompatibility antigen, B-53 alpha chain;…	HLA-B	13	13	5.5	0	40.584	362	362;362;362;362;362;362;362;362;362;362;362;362;362	0	16.468				By MS/MS	By MS/MS	By MS/MS	0	0	0	18638000	21637000	13220000
P10412;Q02539;P22492	P10412;Q02539	16;8;5	4;0;0	4;0;0	Histone H1.4;Histone H1.1	HIST1H1E;HIST1H1A	3	42.5	13.7	13.7	21.865	219	219;215;207	0	36.898	By MS/MS	By MS/MS	By MS/MS	By matching	By MS/MS	By matching	55172000	56446000	24879000	0	8632800	3079100
P10451	P10451	1	1	1	Osteopontin	SPP1	1	4.1	4.1	4.1	35.422	314	314	0.0088417	8.9465							0	0	0	0	0	0
P10599	P10599	5	5	5	Thioredoxin	TXN	1	42.9	42.9	42.9	11.737	105	105	0	35.602	By MS/MS	By MS/MS	By MS/MS	By MS/MS	By MS/MS	By matching	70347000	48153000	3016900	113070000	127010000	55993000
P10809	P10809	25	25	25	60 kDa heat shock protein, mitochondrial	HSPD1	1	45.9	45.9	45.9	61.054	573	573	0	323.31	By MS/MS	By MS/MS	By MS/MS	By MS/MS	By MS/MS	By MS/MS	20952000	43051000	29400000	803680000	1268900000	505620000
P11021	P11021	40	38	38	78 kDa glucose-regulated protein	HSPA5	1	55.4	55.4	55.4	72.332	654	654	0	323.31	By MS/MS	By MS/MS	By MS/MS	By MS/MS	By MS/MS	By MS/MS	401390000	355000000	227470000	2051600000	1994400000	1012900000
P11142	P11142	52	52	35	Heat shock cognate 71 kDa protein	HSPA8	1	69.8	69.8	51.9	70.897	646	646	0	323.31	By MS/MS	By MS/MS	By MS/MS	By MS/MS	By MS/MS	By MS/MS	1977100000	1765700000	906760000	27322000000	33420000000	15677000000
P11166	P11166	5	5	5	Solute carrier family 2, facilitated glucose transporter member 1	SLC2A1	1	12.2	12.2	12.2	54.083	492	492	0	61.142	By matching	By matching	By matching	By MS/MS	By MS/MS	By MS/MS	4724600	537060	1672400	107940000	140230000	49474000
P11177	P11177	2	2	2	Pyruvate dehydrogenase E1 component subunit beta, mitochondrial	PDHB	1	7.5	7.5	7.5	39.233	359	359	0	14.5				By MS/MS	By MS/MS	By matching	0	0	0	2640700	7176900	1593700
P11216;P11217;P06737	P11216	23;7;4	23;7;4	23;7;4	Glycogen phosphorylase, brain form	PYGB	3	32	32	32	96.695	843	843;842;847	0	239.76	By MS/MS	By MS/MS	By MS/MS	By MS/MS	By MS/MS	By MS/MS	69023000	32204000	24838000	498390000	568340000	196280000
P11279	P11279	1	1	1	Lysosome-associated membrane glycoprotein 1	LAMP1	1	3.8	3.8	3.8	44.882	417	417	0	14.666	By matching	By matching		By matching			4833300	2517700	0	3442200	0	0
P11387;Q969P6	P11387	27;4	27;4	27;4	DNA topoisomerase 1	TOP1	2	35.9	35.9	35.9	90.725	765	765;601	0	258.37	By MS/MS	By MS/MS	By MS/MS	By MS/MS	By MS/MS	By MS/MS	1302300000	931910000	476140000	34900000	132380000	11282000
P11413	P11413	2	2	2	Glucose-6-phosphate 1-dehydrogenase	G6PD	1	3.5	3.5	3.5	59.256	515	515	0.0046992	11.588							0	0	0	0	0	0
P11586	P11586	6	6	6	C-1-tetrahydrofolate synthase, cytoplasmic;Methylenetetrahydrofolate dehydrogenase;Methenyltetrahydrofolate cyclohydrolase;Formyltetrahydrofolate synthetase;C-1-tetrahydrofolate synthase, cytoplasmic, N-terminally processed	MTHFD1	1	7.4	7.4	7.4	101.56	935	935	0	38.169				By MS/MS	By MS/MS	By MS/MS	0	0	0	43976000	48926000	5735600
P11940;Q9H361;Q96DU9;Q5JQF8	P11940	27;13;2;1	27;13;2;1	15;10;0;0	Polyadenylate-binding protein 1	PABPC1	4	47.2	47.2	27.4	70.67	636	636;631;382;200	0	323.31	By MS/MS	By MS/MS	By MS/MS	By MS/MS	By MS/MS	By MS/MS	1793400000	1425900000	819080000	265320000	460540000	77059000
P12004	P12004	5	5	5	Proliferating cell nuclear antigen	PCNA	1	23.4	23.4	23.4	28.768	261	261	0	43.448	By matching	By matching	By matching	By MS/MS	By MS/MS	By MS/MS	4901400	6273200	4556000	44721000	152660000	44774000
P12035	P12035	26	5	5	Keratin, type II cytoskeletal 3	KRT3	1	23.9	9.4	9.4	64.416	628	628	0	29.092	By matching	By matching	By MS/MS	By matching	By matching	By matching	1655100	0	54160000	0	3298900	0
P12236;P12235	P12236;P12235	15;9	15;9	7;3	ADP/ATP translocase 3;ADP/ATP translocase 3, N-terminally processed;ADP/ATP translocase 1	SLC25A6;SLC25A4	2	55.7	55.7	35.6	32.866	298	298;298	0	124.46	By MS/MS	By MS/MS	By MS/MS	By MS/MS	By MS/MS	By MS/MS	163250000	87072000	45322000	843500000	1516700000	634220000
P12268	P12268	16	16	15	Inosine-5-monophosphate dehydrogenase 2	IMPDH2	1	39.3	39.3	37.7	55.804	514	514	0	143.92	By MS/MS	By MS/MS	By MS/MS	By MS/MS	By MS/MS	By MS/MS	174390000	134360000	71409000	200160000	488780000	151750000
P12270	P12270	1	1	1	Nucleoprotein TPR	TPR	1	0.4	0.4	0.4	267.29	2363	2363	0.0087796	8.5926	By MS/MS	By MS/MS	By MS/MS				2122900	11996000	1496400	0	0	0
P12273	P12273	6	6	6	Prolactin-inducible protein	PIP	1	43.8	43.8	43.8	16.572	146	146	0	55.371	By MS/MS	By MS/MS	By MS/MS	By MS/MS	By MS/MS	By matching	42186000	74761000	14204000	29467000	51106000	4772600
P12277	P12277	1	1	1	Creatine kinase B-type	CKB	1	2.9	2.9	2.9	42.644	381	381	0.0083963	7.1446							0	0	0	0	0	0
P12956	P12956	35	35	35	X-ray repair cross-complementing protein 6	XRCC6	1	55.5	55.5	55.5	69.842	609	609	0	323.31	By MS/MS	By MS/MS	By MS/MS	By MS/MS	By MS/MS	By matching	1331800000	1171200000	190370000	75978000	211330000	10295000
P13010	P13010	36	36	36	X-ray repair cross-complementing protein 5	XRCC5	1	56	56	56	82.704	732	732	0	323.31	By MS/MS	By MS/MS	By MS/MS	By matching	By MS/MS		1086600000	1079100000	168810000	46659000	227570000	0
P13489	P13489	8	8	8	Ribonuclease inhibitor	RNH1	1	25.8	25.8	25.8	49.973	461	461	0	62.617		By matching	By matching	By MS/MS	By MS/MS	By matching	0	2199000	12709000	27493000	77225000	11038000
P13639	P13639	24	24	23	Elongation factor 2	EEF2	1	35.7	35.7	34.5	95.337	858	858	0	213.51	By MS/MS	By MS/MS	By MS/MS	By MS/MS	By MS/MS	By MS/MS	114620000	113100000	41029000	296070000	580700000	203400000
P13645;Q2M2I5;Q7Z3Y9	P13645	63;4;1	63;4;1	51;0;0	Keratin, type I cytoskeletal 10	KRT10	3	71.6	71.6	68.8	58.826	584	584;525;468	0	323.31	By MS/MS	By MS/MS	By MS/MS	By MS/MS	By MS/MS	By MS/MS	80205000000	44993000000	28662000000	45762000000	68310000000	15752000000
P13646	P13646	27	19	12	Keratin, type I cytoskeletal 13	KRT13	1	57.6	46.9	31.9	49.588	458	458	0	273.52	By MS/MS	By MS/MS	By MS/MS	By MS/MS	By matching	By matching	1261000000	525990000	474390000	50558000	16324000	0
P13647	P13647	69	41	36	Keratin, type II cytoskeletal 5	KRT5	1	63.7	44.7	40.5	62.378	590	590	0	323.31	By MS/MS	By MS/MS	By MS/MS	By MS/MS	By MS/MS	By MS/MS	6066000000	3085700000	917590000	2114300000	8021600000	1003100000
P13796;Q14651;P13797	P13796	9;1;1	9;1;1	9;1;1	Plastin-2	LCP1	3	16.7	16.7	16.7	70.288	627	627;629;630	0	63.865							0	0	0	0	0	0
P13861;P31323	P13861;P31323	2;2	2;2	2;2	cAMP-dependent protein kinase type II-alpha regulatory subunit;cAMP-dependent protein kinase type II-beta regulatory subunit	PRKAR2A;PRKAR2B	2	7.2	7.2	7.2	45.518	404	404;418	0.0028818	11.979		By matching	By matching		By matching		0	6816300	2744400	0	2454700	0
P14174	P14174	2	2	2	Macrophage migration inhibitory factor	MIF	1	17.4	17.4	17.4	12.476	115	115	0	16.695		By matching				By MS/MS	0	3203500	0	0	0	7337800
P14324	P14324	2	2	2	Farnesyl pyrophosphate synthase	FDPS	1	5	5	5	48.275	419	419	0.0047081	11.593				By MS/MS	By MS/MS	By matching	0	0	0	5921700	31990000	4667400
P14406	P14406	1	1	1	Cytochrome c oxidase subunit 7A2, mitochondrial	COX7A2	1	15.7	15.7	15.7	9.3959	83	83	0.00978	6.8977				By MS/MS	By matching	By MS/MS	0	0	0	20789000	39216000	7349500
P14550	P14550	2	2	2	Alcohol dehydrogenase [NADP(+)]	AKR1A1	1	5.5	5.5	5.5	36.573	325	325	0	12.215							0	0	0	0	0	0
P14618;P30613	P14618	31;1	31;1	31;1	Pyruvate kinase PKM	PKM	2	61.6	61.6	61.6	57.936	531	531;574	0	323.31	By MS/MS	By MS/MS	By MS/MS	By MS/MS	By MS/MS	By MS/MS	181620000	175220000	75524000	934650000	1553200000	459470000
P14625;Q58FF3	P14625	14;2	13;2	13;2	Endoplasmin	HSP90B1	2	21.4	19.9	19.9	92.468	803	803;399	0	80.173	By matching	By matching	By matching	By MS/MS	By MS/MS	By MS/MS	5085900	0	5510100	166570000	41753000	43604000
P63162;P14678	P63162;P14678	6;6	6;6	6;6	Small nuclear ribonucleoprotein-associated protein N;Small nuclear ribonucleoprotein-associated proteins B and B	SNRPN;SNRPB	2	23.8	23.8	23.8	24.614	240	240;240	0	39.013	By MS/MS	By MS/MS	By MS/MS	By MS/MS	By MS/MS	By matching	151270000	127780000	52533000	25151000	45624000	4397000
P14735	P14735	5	5	5	Insulin-degrading enzyme	IDE	1	6.9	6.9	6.9	117.97	1019	1019	0	40.751							0	0	0	0	0	0
P14866	P14866	12	12	12	Heterogeneous nuclear ribonucleoprotein L	HNRNPL	1	31.6	31.6	31.6	64.132	589	589	0	151.36	By MS/MS	By MS/MS	By MS/MS	By matching	By matching	By matching	320290000	149760000	67723000	11870000	9727600	6860800
P14868	P14868	9	9	9	Aspartate--tRNA ligase, cytoplasmic	DARS	1	21.8	21.8	21.8	57.136	501	501	0	56.924	By matching	By matching	By matching	By MS/MS	By MS/MS	By matching	3411100	5654600	1590700	45742000	50068000	16408000
P14923;P35222	P14923	31;3	31;3	31;3	Junction plakoglobin	JUP	2	54.4	54.4	54.4	81.744	745	745;781	0	323.31	By MS/MS	By MS/MS	By MS/MS	By MS/MS	By MS/MS	By MS/MS	778900000	354310000	77186000	235040000	454890000	140320000
P15153;P60763	P15153	3;1	3;1	1;0	Ras-related C3 botulinum toxin substrate 2	RAC2	2	18.8	18.8	7.3	21.429	192	192;192	0	21.118		By matching	By matching	By MS/MS	By MS/MS	By matching	0	7902700	2536900	12443000	30265000	20201000
P22392;P15531;O60361	P22392;P15531	3;3;1	3;3;1	3;3;1	Nucleoside diphosphate kinase B;Nucleoside diphosphate kinase A	NME2;NME1	3	25	25	25	17.298	152	152;152;137	0	18.508	By matching	By matching	By matching	By MS/MS	By MS/MS	By matching	12802000	5908000	3473800	33359000	38493000	18793000
P15880	P15880	19	19	19	40S ribosomal protein S2	RPS2	1	59.4	59.4	59.4	31.324	293	293	0	301.1	By MS/MS	By MS/MS	By MS/MS	By MS/MS	By MS/MS	By MS/MS	4504200000	3847900000	1374900000	319450000	1210100000	221940000
P15924	P15924	136	136	136	Desmoplakin	DSP	1	46.3	46.3	46.3	331.77	2871	2871	0	323.31	By MS/MS	By MS/MS	By MS/MS	By MS/MS	By MS/MS	By MS/MS	1453300000	604530000	192830000	605360000	1313200000	211940000
P15927	P15927	7	7	7	Replication protein A 32 kDa subunit	RPA2	1	38.1	38.1	38.1	29.247	270	270	0	96.012	By MS/MS	By MS/MS	By MS/MS				176610000	143890000	59707000	0	0	0
P16070	P16070	4	4	4	CD44 antigen	CD44	1	5.3	5.3	5.3	81.537	742	742	0	23.973	By matching	By matching	By matching	By MS/MS	By MS/MS	By MS/MS	19455000	3918100	7012100	57938000	67036000	28271000
P16157	P16157	1	1	1	Ankyrin-1	ANK1	1	0.4	0.4	0.4	206.26	1881	1881	1	-2	By MS/MS	By MS/MS	By MS/MS	By MS/MS	By MS/MS	By MS/MS	460330000	590970000	331980000	431020000	409630000	702110000
P16401	P16401	11	7	7	Histone H1.5	HIST1H1B	1	31.4	20.4	20.4	22.58	226	226	0	79.523	By MS/MS	By MS/MS	By MS/MS	By MS/MS	By MS/MS	By MS/MS	525300000	357000000	191020000	22279000	87505000	15244000
P16402	P16402	15	3	3	Histone H1.3	HIST1H1D	1	41.6	13.1	13.1	22.35	221	221	0	24.058	By MS/MS	By MS/MS	By MS/MS	By MS/MS	By MS/MS	By matching	129970000	117810000	49209000	10424000	32604000	0
P16403	P16403	17	17	5	Histone H1.2	HIST1H1C	1	45.1	45.1	15.5	21.364	213	213	0	158.71	By MS/MS	By MS/MS	By MS/MS	By MS/MS	By MS/MS	By MS/MS	4067900000	3139000000	1432200000	200130000	633400000	121390000
P16615;O14983	P16615	4;1	4;1	4;1	Sarcoplasmic/endoplasmic reticulum calcium ATPase 2	ATP2A2	2	4.6	4.6	4.6	114.76	1042	1042;1001	0	25.232				By MS/MS	By MS/MS	By matching	0	0	0	25416000	34930000	12228000
P16989	P16989	13	8	8	Y-box-binding protein 3	YBX3	1	55.4	51.1	51.1	40.089	372	372	0	235.15	By MS/MS	By MS/MS	By MS/MS	By MS/MS	By MS/MS	By matching	114820000	125150000	47665000	5555300	19545000	0
P17066;P48741	P17066	11;5	1;1	1;1	Heat shock 70 kDa protein 6	HSPA6	2	16.3	1.7	1.7	71.027	643	643;367	0	19.392	By MS/MS	By MS/MS	By MS/MS	By MS/MS	By MS/MS	By MS/MS	156800000	162960000	73500000	2039700000	2166400000	1105200000
P17096	P17096	2	2	2	High mobility group protein HMG-I/HMG-Y	HMGA1	1	41.1	41.1	41.1	11.676	107	107	0	66.638	By MS/MS	By MS/MS	By matching				37564000	22002000	5544500	0	0	0
P17812	P17812	10	10	10	CTP synthase 1	CTPS1	1	23.2	23.2	23.2	66.69	591	591	0	76.124	By matching	By matching	By matching	By matching	By MS/MS	By matching	10168000	10699000	1594400	50531000	157500000	37977000
P17844	P17844	36	36	27	Probable ATP-dependent RNA helicase DDX5	DDX5	1	59.9	59.9	45.9	69.147	614	614	0	323.31	By MS/MS	By MS/MS	By MS/MS	By MS/MS	By MS/MS	By MS/MS	1766700000	1630500000	665570000	64666000	274910000	47226000
P17858;P08237	P17858;P08237	2;1	2;1	2;1	ATP-dependent 6-phosphofructokinase, liver type;ATP-dependent 6-phosphofructokinase, muscle type	PFKL;PFKM	2	3.5	3.5	3.5	85.018	780	780;780	0.0072993	10.988		By matching		By MS/MS	By MS/MS	By MS/MS	0	1132300	0	13386000	14783000	4676400
P17931	P17931	6	6	6	Galectin-3	LGALS3	1	28.4	28.4	28.4	26.152	250	250	0	47.077	By MS/MS	By MS/MS	By MS/MS	By MS/MS	By MS/MS	By MS/MS	154280000	86195000	59499000	86717000	93769000	8969500
P17980	P17980	5	5	5	26S protease regulatory subunit 6A	PSMC3	1	17.5	17.5	17.5	49.203	439	439	0	34.847	By matching	By matching	By matching	By MS/MS	By MS/MS	By matching	2711200	4852200	1108900	18133000	41019000	7639900
P17987	P17987	24	24	24	T-complex protein 1 subunit alpha	TCP1	1	48.4	48.4	48.4	60.343	556	556	0	254.09	By matching	By MS/MS	By MS/MS	By MS/MS	By MS/MS	By MS/MS	30731000	40116000	32128000	597490000	942110000	396440000
P18077	P18077	11	11	11	60S ribosomal protein L35a	RPL35A	1	50	50	50	12.538	110	110	0	92.472	By MS/MS	By MS/MS	By MS/MS	By MS/MS	By MS/MS	By MS/MS	1389000000	1071200000	340340000	48987000	175870000	52789000
P18085	P18085	8	8	5	ADP-ribosylation factor 4	ARF4	1	44.4	44.4	27.2	20.511	180	180	0	75.373		By MS/MS	By matching	By MS/MS	By MS/MS	By MS/MS	0	11570000	4342300	192670000	212580000	100990000
P18124	P18124	23	23	23	60S ribosomal protein L7	RPL7	1	60.5	60.5	60.5	29.225	248	248	0	277.37	By MS/MS	By MS/MS	By MS/MS	By MS/MS	By MS/MS	By MS/MS	6210600000	4806700000	2000100000	313950000	925960000	223730000
P18206	P18206	4	4	4	Vinculin	VCL	1	5.9	5.9	5.9	123.8	1134	1134	0	32.294							0	0	0	0	0	0
P18583	P18583	2	2	2	Protein SON	SON	1	1.1	1.1	1.1	263.83	2426	2426	0.0090009	10.581		By MS/MS	By matching		By matching	By matching	0	1424900000	227050000	0	369990000	2601200000
P18621	P18621	13	13	13	60S ribosomal protein L17	RPL17	1	57.6	57.6	57.6	21.397	184	184	0	251.54	By MS/MS	By MS/MS	By MS/MS	By MS/MS	By MS/MS	By MS/MS	2879800000	1955900000	792520000	164970000	580570000	104480000
P18669;P15259;Q8N0Y7	P18669;P15259	6;4;2	6;4;2	6;4;2	Phosphoglycerate mutase 1;Phosphoglycerate mutase 2	PGAM1;PGAM2	3	29.1	29.1	29.1	28.804	254	254;253;254	0	88.4	By matching	By matching	By matching	By matching	By matching		3483800	3333000	2057700	3473000	4296900	0
P19012	P19012	15	1	1	Keratin, type I cytoskeletal 15	KRT15	1	20	1.8	1.8	49.211	456	456	1	-2	By matching	By matching	By matching	By matching	By matching	By matching	0	1944700	726380	1634100	0	0
P19013	P19013	32	28	23	Keratin, type II cytoskeletal 4	KRT4	1	51.3	47.8	41.6	57.285	534	534	0	323.31	By MS/MS	By MS/MS	By MS/MS	By matching	By MS/MS	By matching	953240000	468620000	54857000	9131600	111970000	3312700
P19338	P19338	47	47	47	Nucleolin	NCL	1	42.7	42.7	42.7	76.613	710	710	0	323.31	By MS/MS	By MS/MS	By MS/MS	By MS/MS	By MS/MS	By MS/MS	8402200000	5986100000	2677100000	480770000	1333400000	278230000
P19388	P19388	4	4	4	DNA-directed RNA polymerases I, II, and III subunit RPABC1	POLR2E	1	23.3	23.3	23.3	24.551	210	210	0	50.061	By MS/MS	By matching	By matching	By matching	By matching		24130000	16723000	3236800	3656800	4696700	0
P19474	P19474	20	20	20	E3 ubiquitin-protein ligase TRIM21	TRIM21	1	42.9	42.9	42.9	54.169	475	475	0	217.25	By MS/MS	By MS/MS	By MS/MS	By MS/MS	By MS/MS	By MS/MS	570820000	464760000	365820000	149420000	399260000	118870000
P19525	P19525	17	17	17	Interferon-induced, double-stranded RNA-activated protein kinase	EIF2AK2	1	35.8	35.8	35.8	62.094	551	551	0	219.36	By MS/MS	By MS/MS	By MS/MS	By MS/MS	By MS/MS		409560000	329930000	126130000	16473000	25798000	0
P19823	P19823	7	7	7	Inter-alpha-trypsin inhibitor heavy chain H2	ITIH2	1	9.3	9.3	9.3	106.46	946	946	0	57.647							0	0	0	0	0	0
P19827	P19827	3	3	3	Inter-alpha-trypsin inhibitor heavy chain H1	ITIH1	1	4.1	4.1	4.1	101.39	911	911	0	26.383							0	0	0	0	0	0
P19971	P19971	2	2	2	Thymidine phosphorylase	TYMP	1	5.4	5.4	5.4	49.955	482	482	0	13.427	By matching		By matching				6681500	0	3632900	0	0	0
P20042	P20042	18	18	18	Eukaryotic translation initiation factor 2 subunit 2	EIF2S2	1	47.1	47.1	47.1	38.388	333	333	0	178.8	By MS/MS	By MS/MS	By MS/MS	By matching	By MS/MS	By matching	481270000	395750000	92722000	40275000	95854000	34973000
P20290	P20290	1	1	1	Transcription factor BTF3	BTF3	1	9.2	9.2	9.2	22.168	206	206	0.0084602	7.2507	By matching	By matching	By matching	By matching			13927000	7841700	4224100	2972600	0	0
Q9NRW1;P20340;Q14964	Q9NRW1;P20340;Q14964	1;1;1	1;1;1	1;1;1	Ras-related protein Rab-6B;Ras-related protein Rab-6A;Ras-related protein Rab-39A	RAB6B;RAB6A;RAB39A	3	5.3	5.3	5.3	23.461	208	208;208;217	0.0091667	7.0786		By matching	By MS/MS	By MS/MS	By MS/MS	By MS/MS	0	5597300	2002600	33062000	45854000	19395000
P20591;P20592	P20591	9;2	9;2	9;2	Interferon-induced GTP-binding protein Mx1;Interferon-induced GTP-binding protein Mx1, N-terminally processed	MX1	2	17.1	17.1	17.1	75.519	662	662;715	0	74.458	By matching	By MS/MS	By matching	By MS/MS	By MS/MS	By MS/MS	3181000	1149200	4453100	79361000	59619000	69955000
P20700;Q03252	P20700	9;4	7;2	7;2	Lamin-B1	LMNB1	2	15.4	15.2	15.2	66.408	586	586;620	0	78.426	By MS/MS	By MS/MS	By MS/MS	By MS/MS	By MS/MS	By matching	31259000	10171000	9376400	29199000	22917000	3396700
P20742	P20742	3	1	1	Pregnancy zone protein	PZP	1	2.3	0.8	0.8	163.86	1482	1482	0	15.313							0	0	0	0	0	0
P20930	P20930	17	17	17	Filaggrin	FLG	1	5.3	5.3	5.3	435.16	4061	4061	0	147.62	By MS/MS	By MS/MS	By MS/MS	By MS/MS	By MS/MS	By MS/MS	262140000	149790000	22564000	388970000	171760000	115470000
P21281;P15313	P21281	3;1	3;1	3;1	V-type proton ATPase subunit B, brain isoform	ATP6V1B2	2	8	8	8	56.5	511	511;513	0	18.317							0	0	0	0	0	0
P21333;Q14315	P21333	133;10	133;10	126;3	Filamin-A	FLNA	2	64.8	64.8	63.2	280.74	2647	2647;2725	0	323.31	By MS/MS	By MS/MS	By MS/MS	By MS/MS	By MS/MS	By MS/MS	11325000000	9201600000	5391600000	5111100000	8980400000	2396300000
P21741	P21741	1	1	1	Midkine	MDK	1	7	7	7	15.585	143	143	0.0084034	7.1471	By matching	By matching	By matching		By matching		6277600	5442400	3567500	0	1673500	0
P21796	P21796	3	3	3	Voltage-dependent anion-selective channel protein 1	VDAC1	1	13.4	13.4	13.4	30.772	283	283	0	16.028	By matching	By matching	By matching	By matching	By matching		2459500	1044600	684410	1849700	8641400	0
P21980	P21980	8	8	8	Protein-glutamine gamma-glutamyltransferase 2	TGM2	1	15.7	15.7	15.7	77.328	687	687	0	54.529	By matching	By matching	By MS/MS	By MS/MS	By MS/MS	By MS/MS	6672000	10253000	15322000	50385000	120210000	79335000
P22061	P22061	5	5	5	Protein-L-isoaspartate(D-aspartate) O-methyltransferase	PCMT1	1	27.3	27.3	27.3	24.636	227	227	0	39.851				By MS/MS	By MS/MS	By MS/MS	0	0	0	91573000	73334000	32491000
P22087	P22087	13	13	11	rRNA 2-O-methyltransferase fibrillarin	FBL	1	46.1	46.1	42.7	33.784	321	321	0	128.66	By MS/MS	By MS/MS	By MS/MS	By MS/MS	By MS/MS	By MS/MS	541020000	367030000	144400000	22467000	60391000	11967000
P22102	P22102	3	3	3	Trifunctional purine biosynthetic protein adenosine-3;Phosphoribosylamine--glycine ligase;Phosphoribosylformylglycinamidine cyclo-ligase;Phosphoribosylglycinamide formyltransferase	GART	1	4.3	4.3	4.3	107.77	1010	1010	0	20.046	By matching			By matching	By MS/MS	By matching	1629400	0	0	9281800	21812000	2656400
P22234	P22234	2	2	2	Multifunctional protein ADE2;Phosphoribosylaminoimidazole-succinocarboxamide synthase;Phosphoribosylaminoimidazole carboxylase	PAICS	1	5.9	5.9	5.9	47.079	425	425	0	51.868				By MS/MS	By MS/MS	By MS/MS	0	0	0	8020500	6206000	4429700
P22528	P22528	4	4	1	Cornifin-B	SPRR1B	1	55.1	55.1	19.1	9.8875	89	89	0	21.589	By MS/MS	By matching	By matching		By matching		34276000	4156300	2572800	0	5961200	0
P22626	P22626	26	26	25	Heterogeneous nuclear ribonucleoproteins A2/B1	HNRNPA2B1	1	52.7	52.7	52.7	37.429	353	353	0	323.31	By MS/MS	By MS/MS	By MS/MS	By MS/MS	By MS/MS	By MS/MS	1918900000	1420800000	635260000	153790000	267600000	44602000
P22695	P22695	2	2	2	Cytochrome b-c1 complex subunit 2, mitochondrial	UQCRC2	1	6.6	6.6	6.6	48.442	453	453	0	34.111				By MS/MS	By MS/MS	By MS/MS	0	0	0	16630000	18333000	4695300
P22735	P22735	6	6	6	Protein-glutamine gamma-glutamyltransferase K	TGM1	1	9.4	9.4	9.4	89.786	817	817	0	60.189	By MS/MS	By matching	By MS/MS	By MS/MS	By MS/MS		46946000	75329000	15701000	33725000	31777000	0
P23142	P23142	4	4	4	Fibulin-1	FBLN1	1	8.7	8.7	8.7	77.213	703	703	0	45.837							0	0	0	0	0	0
P23246	P23246	6	6	4	Splicing factor, proline- and glutamine-rich	SFPQ	1	9.3	9.3	7.9	76.149	707	707	0	43.819	By MS/MS	By MS/MS	By MS/MS		By matching		22432000	26672000	8675400	0	5378100	0
P23381	P23381	58	58	58	Tryptophan--tRNA ligase, cytoplasmic;T1-TrpRS;T2-TrpRS	WARS	1	94.7	94.7	94.7	53.165	471	471	0	323.31	By MS/MS	By MS/MS	By MS/MS	By MS/MS	By MS/MS	By MS/MS	779920000	623130000	376060000	549340000000	793440000000	449080000000
P23396	P23396	24	24	24	40S ribosomal protein S3	RPS3	1	83.5	83.5	83.5	26.688	243	243	0	306.19	By MS/MS	By MS/MS	By MS/MS	By MS/MS	By MS/MS	By MS/MS	2009300000	1633400000	666490000	1945400000	2963600000	1634900000
P23528;Q9Y281	P23528	22;7	22;7	20;5	Cofilin-1	CFL1	2	92.8	92.8	85.5	18.502	166	166;166	0	323.31	By MS/MS	By MS/MS	By MS/MS	By MS/MS	By MS/MS	By MS/MS	229180000	213840000	69705000	1642300000	2445300000	1087500000
P23588	P23588	4	4	4	Eukaryotic translation initiation factor 4B	EIF4B	1	7.7	7.7	7.7	69.15	611	611	0	27.652	By matching	By MS/MS	By matching		By matching		5027400	17382000	14395000	0	8267300	0
P24534	P24534	8	5	5	Elongation factor 1-beta	EEF1B2	1	47.6	38.7	38.7	24.763	225	225	0	142.92	By MS/MS	By MS/MS	By MS/MS	By MS/MS	By MS/MS	By matching	280590000	229890000	118600000	58348000	144450000	10538000
P24752	P24752	1	1	1	Acetyl-CoA acetyltransferase, mitochondrial	ACAT1	1	4	4	4	45.199	427	427	0	18.327				By MS/MS	By matching		0	0	0	7467700	5717700	0
P24928	P24928	2	2	2	DNA-directed RNA polymerase II subunit RPB1	POLR2A	1	1.4	1.4	1.4	217.17	1970	1970	0	16.729							0	0	0	0	0	0
P25205	P25205	5	5	5	DNA replication licensing factor MCM3	MCM3	1	8.2	8.2	8.2	90.98	808	808	0	62.79	By matching	By MS/MS	By matching	By MS/MS	By MS/MS	By matching	3282500	20557000	6434200	21287000	81119000	8699400
P25311	P25311	7	7	7	Zinc-alpha-2-glycoprotein	AZGP1	1	31.5	31.5	31.5	34.258	298	298	0	51.363	By MS/MS	By MS/MS	By matching	By MS/MS	By MS/MS	By matching	42997000	54471000	11139000	44813000	62865000	9873400
P25398	P25398	9	9	9	40S ribosomal protein S12	RPS12	1	77.3	77.3	77.3	14.515	132	132	0	210.6	By MS/MS	By MS/MS	By MS/MS	By MS/MS	By MS/MS	By MS/MS	590580000	538290000	246800000	272030000	919840000	467520000
P25685	P25685	2	2	2	DnaJ homolog subfamily B member 1	DNAJB1	1	5.6	5.6	5.6	38.044	340	340	0.004686	11.515				By MS/MS	By MS/MS	By matching	0	0	0	6454100	5349400	1575500
P25705	P25705	20	20	20	ATP synthase subunit alpha, mitochondrial	ATP5A1	1	42.5	42.5	42.5	59.75	553	553	0	322.46	By MS/MS	By MS/MS	By MS/MS	By MS/MS	By MS/MS	By MS/MS	97827000	122410000	49174000	849320000	1459600000	430310000
P25787	P25787	3	3	3	Proteasome subunit alpha type-2	PSMA2	1	18.4	18.4	18.4	25.898	234	234	0	63.464	By matching				By matching	By MS/MS	5017600	0	0	0	32019000	18054000
P25788	P25788	4	4	4	Proteasome subunit alpha type-3	PSMA3	1	22	22	22	28.433	255	255	0	35.57		By matching	By matching	By MS/MS	By MS/MS		0	3669400	2163800	17484000	23887000	0
P25789	P25789	4	4	4	Proteasome subunit alpha type-4	PSMA4	1	21.5	21.5	21.5	29.483	261	261	0	33.835	By matching	By MS/MS	By MS/MS	By matching	By MS/MS	By matching	14977000	11659000	2626100	21264000	36542000	3081200
P25815	P25815	1	1	1	Protein S100-P	S100P	1	13.7	13.7	13.7	10.4	95	95	0.0098765	6.9585							0	0	0	0	0	0
P26038;P35241;P15311	P26038	14;2;2	14;2;2	14;2;2	Moesin	MSN	3	28.8	28.8	28.8	67.819	577	577;583;586	0	111.23	By matching	By matching	By matching	By matching	By matching		16388000	12474000	16341000	3401600	7478900	0
P26196	P26196	3	3	3	Probable ATP-dependent RNA helicase DDX6	DDX6	1	8.3	8.3	8.3	54.416	483	483	0	19.145	By matching	By MS/MS	By matching	By matching	By matching		7787500	13665000	3537800	2182800	3827400	0
P26358	P26358	1	1	1	DNA (cytosine-5)-methyltransferase 1	DNMT1	1	0.9	0.9	0.9	183.16	1616	1616	0.0090984	7.0025	By matching	By matching					1937500	1536300	0	0	0	0
P26368	P26368	10	10	10	Splicing factor U2AF 65 kDa subunit	U2AF2	1	32.2	32.2	32.2	53.5	475	475	0	71.535	By MS/MS	By MS/MS	By MS/MS	By matching	By MS/MS	By matching	101260000	89543000	36289000	1283200	8876200	3068000
P26373	P26373	20	20	20	60S ribosomal protein L13	RPL13	1	57.3	57.3	57.3	24.261	211	211	0	323.31	By MS/MS	By MS/MS	By MS/MS	By MS/MS	By MS/MS	By MS/MS	5858400000	4770600000	1822500000	296760000	834540000	200960000
P26583	P26583	1	1	1	High mobility group protein B2	HMGB2	1	7.2	7.2	7.2	24.033	209	209	0.0089606	10.13							0	0	0	0	0	0
P26599;O95758	P26599	18;3	18;3	18;3	Polypyrimidine tract-binding protein 1	PTBP1	2	49.7	49.7	49.7	57.221	531	531;552	0	323.31	By MS/MS	By MS/MS	By MS/MS	By matching	By MS/MS	By matching	1245500000	933140000	275770000	63633000	197880000	17693000
P26640	P26640	7	7	7	Valine--tRNA ligase	VARS	1	8.1	8.1	8.1	140.47	1264	1264	0	53.937	By MS/MS	By MS/MS	By matching	By matching	By matching		10080000	38038000	12332000	16370000	27319000	0
P26641	P26641	21	21	21	Elongation factor 1-gamma	EEF1G	1	42.1	42.1	42.1	50.118	437	437	0	323.31	By MS/MS	By MS/MS	By MS/MS	By MS/MS	By MS/MS	By MS/MS	1059800000	970680000	684720000	403330000	592840000	123500000
P27105	P27105	11	11	11	Erythrocyte band 7 integral membrane protein	STOM	1	43.8	43.8	43.8	31.73	288	288	0	130.1	By MS/MS	By MS/MS	By MS/MS	By matching	By MS/MS	By matching	349790000	353160000	164320000	15060000	31151000	9825500
P27348	P27348	10	6	6	14-3-3 protein theta	YWHAQ	1	45.3	31.4	31.4	27.764	245	245	0	108.03	By MS/MS	By MS/MS	By MS/MS	By MS/MS	By MS/MS	By MS/MS	18209000	10586000	7443600	36664000	81736000	25473000
P27482	P27482	4	3	3	Calmodulin-like protein 3	CALML3	1	32.9	28.2	28.2	16.891	149	149	0	140.07	By matching	By matching	By matching	By matching		By matching	0	0	0	0	0	0
P27635;Q96L21	P27635	16;5	16;5	16;5	60S ribosomal protein L10	RPL10	2	53.3	53.3	53.3	24.604	214	214;214	0	305.31	By MS/MS	By MS/MS	By MS/MS	By MS/MS	By MS/MS	By MS/MS	4091800000	3137700000	1132800000	198010000	624080000	144880000
P27694	P27694	28	28	28	Replication protein A 70 kDa DNA-binding subunit;Replication protein A 70 kDa DNA-binding subunit, N-terminally processed	RPA1	1	54.4	54.4	54.4	68.137	616	616	0	323.31	By MS/MS	By MS/MS	By MS/MS	By matching	By matching		509740000	384140000	155060000	46216000	47411000	0
P27708;P31327	P27708	64;1	64;1	64;1	CAD protein;Glutamine-dependent carbamoyl-phosphate synthase;Aspartate carbamoyltransferase;Dihydroorotase	CAD	2	39.3	39.3	39.3	242.98	2225	2225;1500	0	323.31	By MS/MS	By MS/MS	By MS/MS	By MS/MS	By MS/MS	By MS/MS	1536000000	1292600000	556060000	979820000	1421600000	268610000
P27797	P27797	2	2	2	Calreticulin	CALR	1	7.9	7.9	7.9	48.141	417	417	0.0019305	12.035				By MS/MS			0	0	0	16954000	0	0
P27816	P27816	6	6	6	Microtubule-associated protein 4	MAP4	1	8.2	8.2	8.2	121	1152	1152	0	39.988	By MS/MS	By MS/MS	By matching				23574000	25899000	6674800	0	0	0
P27824	P27824	14	14	14	Calnexin	CANX	1	28.4	28.4	28.4	67.567	592	592	0	125.28		By matching		By MS/MS	By MS/MS	By MS/MS	0	1798000	0	388150000	285570000	95345000
P28066	P28066	6	6	6	Proteasome subunit alpha type-5	PSMA5	1	29.5	29.5	29.5	26.411	241	241	0	46.365	By MS/MS	By MS/MS	By matching	By MS/MS	By MS/MS	By MS/MS	22044000	12829000	6344300	52569000	45727000	15735000
P28072	P28072	1	1	1	Proteasome subunit beta type-6	PSMB6	1	4.6	4.6	4.6	25.357	239	239	0.0083822	7.1302	By MS/MS	By matching		By matching	By matching	By matching	11124000	4597400	0	13133000	15466000	4656600
P28074	P28074	2	2	2	Proteasome subunit beta type-5	PSMB5	1	8.7	8.7	8.7	28.48	263	263	0	14.247		By matching					0	2243400	0	0	0	0
P28799	P28799	2	2	2	Granulins;Acrogranin;Paragranulin;Granulin-1;Granulin-2;Granulin-3;Granulin-4;Granulin-5;Granulin-6;Granulin-7	GRN	1	5.1	5.1	5.1	63.544	593	593	0.0028708	11.869	By matching				By MS/MS	By matching	8477100	0	0	0	11417000	3992500
P28838	P28838	3	3	3	Cytosol aminopeptidase	LAP3	1	7.5	7.5	7.5	56.166	519	519	0	20.23	By matching			By MS/MS	By MS/MS	By MS/MS	998700	0	0	13319000	33715000	9954700
P29034	P29034	2	2	2	Protein S100-A2	S100A2	1	26.5	26.5	26.5	11.117	98	98	0	12.671	By MS/MS				By matching		16963000	0	0	0	2820100	0
P29218	P29218	2	2	2	Inositol monophosphatase 1	IMPA1	1	7.6	7.6	7.6	30.188	277	277	0.0055866	11.428				By MS/MS	By MS/MS	By matching	0	0	0	6332400	8447800	13281000
P29350	P29350	1	1	1	Tyrosine-protein phosphatase non-receptor type 6	PTPN6	1	2.7	2.7	2.7	67.56	595	595	0.0085911	7.5454							0	0	0	0	0	0
P29401	P29401	7	7	7	Transketolase	TKT	1	16.2	16.2	16.2	67.877	623	623	0	57.375	By matching	By matching	By matching	By MS/MS	By MS/MS	By MS/MS	9278400	1572500	2056000	25544000	27670000	31895000
P29508	P29508	10	10	3	Serpin B3	SERPINB3	1	27.2	27.2	11	44.564	390	390	0	126.9	By MS/MS	By MS/MS	By MS/MS	By MS/MS	By matching	By matching	145780000	51110000	42097000	44273000	33018000	11505000
P29590	P29590	9	9	9	Protein PML	PML	1	11.5	11.5	11.5	97.55	882	882	0	63.452			By matching	By MS/MS	By MS/MS	By MS/MS	0	0	2867100	67009000	111710000	33643000
P29692	P29692	16	16	13	Elongation factor 1-delta	EEF1D	1	59.1	59.1	55.9	31.121	281	281	0	264.78	By MS/MS	By MS/MS	By MS/MS	By MS/MS	By MS/MS	By MS/MS	1452500000	1675600000	1055900000	424120000	725000000	61255000
P30041	P30041	10	10	10	Peroxiredoxin-6	PRDX6	1	55.8	55.8	55.8	25.035	224	224	0	117.17	By MS/MS	By MS/MS	By MS/MS	By MS/MS	By MS/MS	By MS/MS	120510000	104870000	39575000	150780000	269650000	81617000
P30044	P30044	3	3	3	Peroxiredoxin-5, mitochondrial	PRDX5	1	19.6	19.6	19.6	22.086	214	214	0	63.349		By matching	By matching		By MS/MS		0	10903000	8038300	0	2903700	0
P30050	P30050	11	11	11	60S ribosomal protein L12	RPL12	1	69.1	69.1	69.1	17.818	165	165	0	308.35	By MS/MS	By MS/MS	By MS/MS	By MS/MS	By MS/MS	By MS/MS	1622000000	1559100000	525780000	552830000	1432100000	466050000
P30101	P30101	11	11	11	Protein disulfide-isomerase A3	PDIA3	1	25.5	25.5	25.5	56.782	505	505	0	78.003				By MS/MS	By MS/MS	By matching	0	0	0	113400000	32343000	56398000
P30153;P30154	P30153	9;2	9;2	9;2	Serine/threonine-protein phosphatase 2A 65 kDa regulatory subunit A alpha isoform	PPP2R1A	2	22.2	22.2	22.2	65.308	589	589;601	0	87.95	By matching	By MS/MS	By MS/MS	By MS/MS	By MS/MS	By matching	18888000	19506000	7716400	43898000	77325000	13565000
P30622;Q9UDT6	P30622	28;2	28;2	28;2	CAP-Gly domain-containing linker protein 1	CLIP1	2	23.3	23.3	23.3	162.24	1438	1438;1046	0	313.27	By MS/MS	By MS/MS	By MS/MS	By MS/MS	By matching	By matching	363220000	343960000	206040000	13131000	54412000	1593800
P30876	P30876	4	4	4	DNA-directed RNA polymerase II subunit RPB2	POLR2B	1	4.8	4.8	4.8	133.9	1174	1174	0	28.156	By matching	By matching	By MS/MS	By matching	By matching		2511300	3428100	2266500	4435300	10657000	0
P31025;Q5VSP4	P31025;Q5VSP4	2;1	2;1	2;1	Lipocalin-1;Putative lipocalin 1-like protein 1	LCN1;LCN1P1	2	12.5	12.5	12.5	19.25	176	176;162	0.0047348	11.711	By matching	By MS/MS	By matching			By matching	17331000	26002000	2832600	0	0	5547100
P31040	P31040	6	6	6	Succinate dehydrogenase [ubiquinone] flavoprotein subunit, mitochondrial	SDHA	1	12.5	12.5	12.5	72.691	664	664	0	40.621				By MS/MS	By MS/MS	By matching	0	0	0	17093000	88679000	3762000
P31146	P31146	2	2	2	Coronin-1A	CORO1A	1	6.1	6.1	6.1	51.026	461	461	0	13.809							0	0	0	0	0	0
P31151	P31151	7	7	2	Protein S100-A7	S100A7	1	55.4	55.4	11.9	11.471	101	101	0	124.42	By MS/MS	By MS/MS	By MS/MS	By MS/MS	By MS/MS	By matching	392870000	119330000	44018000	37346000	48485000	12062000
P31153;Q00266	P31153	6;1	6;1	6;1	S-adenosylmethionine synthase isoform type-2	MAT2A	2	17.2	17.2	17.2	43.66	395	395;395	0	48.874	By matching	By MS/MS	By MS/MS	By MS/MS	By MS/MS	By MS/MS	15325000	23671000	10591000	96308000	177250000	96021000
P31689	P31689	8	8	8	DnaJ homolog subfamily A member 1	DNAJA1	1	23.7	23.7	23.7	44.868	397	397	0	73.063	By MS/MS	By MS/MS	By matching	By MS/MS	By MS/MS	By MS/MS	26042000	14741000	2589200	114440000	232240000	97884000
P31942	P31942	2	2	2	Heterogeneous nuclear ribonucleoprotein H3	HNRNPH3	1	8.4	8.4	8.4	36.926	346	346	0	12.394	By matching	By MS/MS	By MS/MS				4327700	2125700	9823600	0	0	0
P31943	P31943	14	14	8	Heterogeneous nuclear ribonucleoprotein H;Heterogeneous nuclear ribonucleoprotein H, N-terminally processed	HNRNPH1	1	41.6	41.6	23.6	49.229	449	449	0	323.31	By MS/MS	By MS/MS	By MS/MS	By MS/MS	By MS/MS	By MS/MS	1272700000	1018800000	420330000	229750000	412400000	130020000
P31944	P31944	22	22	22	Caspase-14;Caspase-14 subunit p17, mature form;Caspase-14 subunit p10, mature form;Caspase-14 subunit p20, intermediate form;Caspase-14 subunit p8, intermediate form	CASP14	1	60.7	60.7	60.7	27.679	242	242	0	187.16	By MS/MS	By MS/MS	By MS/MS	By MS/MS	By MS/MS	By matching	106070000	125240000	28975000	95708000	102240000	14895000
P31946	P31946	8	3	3	14-3-3 protein beta/alpha;14-3-3 protein beta/alpha, N-terminally processed	YWHAB	1	31.7	14.2	14.2	28.082	246	246	0	38.978	By MS/MS	By MS/MS	By MS/MS	By MS/MS	By matching	By matching	14564000	21089000	10754000	27257000	25693000	4064200
P31947	P31947	10	7	7	14-3-3 protein sigma	SFN	1	41.9	31.9	31.9	27.774	248	248	0	44.42	By MS/MS	By MS/MS	By matching	By MS/MS	By MS/MS	By matching	28082000	21459000	7119100	31766000	26780000	14473000
P31949	P31949	2	2	2	Protein S100-A11;Protein S100-A11, N-terminally processed	S100A11	1	24.8	24.8	24.8	11.74	105	105	0	38.843				By matching	By matching		0	0	0	5021900	7364700	0
P32119	P32119	6	5	5	Peroxiredoxin-2	PRDX2	1	27.8	22.2	22.2	21.892	198	198	0	31.446	By MS/MS	By MS/MS	By MS/MS	By MS/MS	By MS/MS	By matching	58521000	13536000	11459000	29155000	28778000	12527000
P32969	P32969	11	11	11	60S ribosomal protein L9	RPL9	1	54.2	54.2	54.2	21.863	192	192	0	218.57	By MS/MS	By MS/MS	By MS/MS	By matching	By MS/MS	By matching	1222900000	942040000	254710000	19872000	130410000	11159000
P32970	P32970	6	6	6	CD70 antigen	CD70	1	39.9	39.9	39.9	21.118	193	193	0	39.278		By matching	By matching	By MS/MS	By MS/MS	By MS/MS	0	9232800	8993600	55360000	134770000	57334000
P33176;O60282;Q12840	P33176;O60282;Q12840	2;1;1	2;1;1	2;1;1	Kinesin-1 heavy chain;Kinesin heavy chain isoform 5C;Kinesin heavy chain isoform 5A	KIF5B;KIF5C;KIF5A	3	2.8	2.8	2.8	109.68	963	963;957;1032	0	14.109	By MS/MS						3254300	0	0	0	0	0
P33241	P33241	1	1	1	Lymphocyte-specific protein 1	LSP1	1	3.2	3.2	3.2	37.191	339	339	0.0097403	6.8512							0	0	0	0	0	0
P33991	P33991	8	8	8	DNA replication licensing factor MCM4	MCM4	1	11.6	11.6	11.6	96.557	863	863	0	60.774		By matching	By matching	By MS/MS	By MS/MS	By MS/MS	0	2001700	1285700	50121000	111020000	41940000
P33993	P33993	13	13	13	DNA replication licensing factor MCM7	MCM7	1	24.5	24.5	24.5	81.307	719	719	0	93.841	By matching		By matching	By MS/MS	By MS/MS	By MS/MS	23285000	0	4167200	91243000	179930000	38684000
P34897	P34897	5	5	4	Serine hydroxymethyltransferase, mitochondrial	SHMT2	1	11.1	11.1	8.3	55.992	504	504	0	29.836	By matching	By matching		By MS/MS	By MS/MS	By MS/MS	5396600	1404800	0	42617000	49739000	17337000
P34931	P34931	13	1	1	Heat shock 70 kDa protein 1-like	HSPA1L	1	23.7	2.5	2.5	70.374	641	641	1	-2	By matching	By matching	By matching	By matching	By MS/MS	By matching	0	0	0	0	22463000	8129500
P34932	P34932	22	21	20	Heat shock 70 kDa protein 4	HSPA4	1	37.1	36.2	34.3	94.33	840	840	0	323.31	By MS/MS	By MS/MS	By MS/MS	By MS/MS	By MS/MS	By MS/MS	105580000	58898000	36169000	481560000	541230000	255250000
P35030	P35030	1	1	1	Trypsin-3	PRSS3	1	4.3	4.3	4.3	32.528	304	304	0.0089047	9.7453		By matching	By MS/MS	By MS/MS	By MS/MS	By MS/MS	0	13113000	9108000	15375000	12270000	13901000
P35080	P35080	1	1	1	Profilin-2	PFN2	1	10	10	10	15.046	140	140	0.0086281	7.6391					By MS/MS	By matching	0	0	0	0	6896100	3830200
P35232	P35232	2	2	2	Prohibitin	PHB	1	7.4	7.4	7.4	29.804	272	272	0	12.383			By matching	By MS/MS			0	0	1964100	10575000	0	0
P35244	P35244	6	6	6	Replication protein A 14 kDa subunit	RPA3	1	67.8	67.8	67.8	13.569	121	121	0	74.3	By MS/MS	By MS/MS	By MS/MS	By matching	By matching		128770000	98195000	43585000	3544400	11937000	0
P35251	P35251	6	6	6	Replication factor C subunit 1	RFC1	1	6.6	6.6	6.6	128.25	1148	1148	0	68.396	By MS/MS	By MS/MS	By MS/MS		By matching	By matching	21186000	43778000	8421300	0	2593400	2239100
P35268	P35268	5	5	5	60S ribosomal protein L22	RPL22	1	52.3	52.3	52.3	14.787	128	128	0	323.31	By MS/MS	By MS/MS	By MS/MS	By MS/MS	By MS/MS	By MS/MS	1384700000	1245300000	668820000	253770000	476980000	58092000
P49747;P35443	P49747;P35443	1;1	1;1	1;1	Cartilage oligomeric matrix protein;Thrombospondin-4	COMP;THBS4	2	1.7	1.7	1.7	82.86	757	757;961	0.0072727	10.862							0	0	0	0	0	0
P35527	P35527	61	60	60	Keratin, type I cytoskeletal 9	KRT9	1	77.2	77.2	77.2	62.064	623	623	0	323.31	By MS/MS	By MS/MS	By MS/MS	By MS/MS	By MS/MS	By MS/MS	56291000000	21711000000	3142000000	23464000000	44361000000	10839000000
P35579	P35579	32	24	22	Myosin-9	MYH9	1	20.6	15.8	14.2	226.53	1960	1960	0	323.31	By MS/MS	By MS/MS	By MS/MS	By MS/MS	By MS/MS	By matching	68250000	130360000	39795000	27071000	65461000	15972000
P35580	P35580	47	47	35	Myosin-10	MYH10	1	30.7	30.7	24	229	1976	1976	0	323.31	By MS/MS	By MS/MS	By MS/MS	By MS/MS	By MS/MS	By matching	414730000	258020000	133610000	47394000	70028000	7750700
P35606	P35606	18	18	18	Coatomer subunit beta	COPB2	1	27.8	27.8	27.8	102.49	906	906	0	152.47	By MS/MS	By MS/MS	By MS/MS	By MS/MS	By MS/MS	By matching	175080000	160490000	84421000	85549000	167120000	12653000
P35613	P35613	4	4	4	Basigin	BSG	1	14.3	14.3	14.3	42.2	385	385	0	24.534				By matching	By MS/MS	By MS/MS	0	0	0	40638000	50064000	7607500
P35625	P35625	4	4	4	Metalloproteinase inhibitor 3	TIMP3	1	17.5	17.5	17.5	24.145	211	211	0	23.735		By matching	By matching				0	11441000	8586200	0	0	0
P35637;Q92804	P35637	8;2	8;2	8;2	RNA-binding protein FUS	FUS	2	21.9	21.9	21.9	53.425	526	526;592	0	78.896	By MS/MS	By MS/MS	By MS/MS		By MS/MS	By matching	281590000	168290000	92048000	0	27465000	5387100
P35659	P35659	3	3	3	Protein DEK	DEK	1	9.3	9.3	9.3	42.674	375	375	0	16.857	By matching	By MS/MS					7089300	7524600	0	0	0	0
P35908	P35908	88	88	63	Keratin, type II cytoskeletal 2 epidermal	KRT2	1	95.9	95.9	83.1	65.432	639	639	0	323.31	By MS/MS	By MS/MS	By MS/MS	By MS/MS	By MS/MS	By MS/MS	62636000000	30861000000	18218000000	31181000000	42477000000	9992700000
P35998	P35998	4	4	4	26S protease regulatory subunit 7	PSMC2	1	10.4	10.4	10.4	48.633	433	433	0	29.248	By MS/MS	By MS/MS	By MS/MS	By MS/MS	By MS/MS	By MS/MS	0	2789600	1471600	42372000	41436000	15309000
P36542	P36542	7	7	7	ATP synthase subunit gamma, mitochondrial	ATP5C1	1	25.5	25.5	25.5	32.996	298	298	0	55.003	By MS/MS	By MS/MS	By MS/MS	By MS/MS	By MS/MS	By MS/MS	96536000	86115000	36492000	116820000	118760000	63916000
P36578	P36578	34	34	34	60S ribosomal protein L4	RPL4	1	56	56	56	47.697	427	427	0	323.31	By MS/MS	By MS/MS	By MS/MS	By MS/MS	By MS/MS	By MS/MS	7870300000	5847100000	2364000000	279070000	1428300000	273650000
P36776	P36776	2	2	2	Lon protease homolog, mitochondrial	LONP1	1	2.2	2.2	2.2	106.49	959	959	0.0090334	10.622				By MS/MS	By MS/MS		0	0	0	2294100	4319800	0
P36873	P36873	8	1	1	Serine/threonine-protein phosphatase PP1-gamma catalytic subunit	PPP1CC	1	28.5	4.3	4.3	36.983	323	323	0.0046685	11.441	By MS/MS	By matching	By MS/MS	By matching	By matching	By matching	6547600	6826100	2640000	0	0	0
P36952	P36952	1	1	1	Serpin B5	SERPINB5	1	4.5	4.5	4.5	42.1	375	375	0	14.478							0	0	0	0	0	0
P36954	P36954	1	1	1	DNA-directed RNA polymerase II subunit RPB9	POLR2I	1	18.4	18.4	18.4	14.523	125	125	0.0086957	7.9919							0	0	0	0	0	0
P36955	P36955	4	4	4	Pigment epithelium-derived factor	SERPINF1	1	12.7	12.7	12.7	46.312	418	418	0	79.058							0	0	0	0	0	0
P37108	P37108	7	7	7	Signal recognition particle 14 kDa protein	SRP14	1	43.4	43.4	43.4	14.57	136	136	0	178.35	By MS/MS	By MS/MS	By MS/MS	By MS/MS	By matching	By matching	284860000	99935000	78833000	28073000	27757000	3843600
P37802;Q9UI15	P37802	6;1	6;1	6;1	Transgelin-2	TAGLN2	2	38.7	38.7	38.7	22.391	199	199;199	0	52.036		By matching	By matching				0	1003800	622360	0	0	0
P37837	P37837	1	1	1	Transaldolase	TALDO1	1	3.9	3.9	3.9	37.54	337	337	0.008881	9.6848							0	0	0	0	0	0
P38159;Q96E39;O75526;Q8N7X1	P38159	6;2;2;1	6;2;2;1	6;2;2;1	RNA-binding motif protein, X chromosome;RNA-binding motif protein, X chromosome, N-terminally processed	RBMX	4	15.1	15.1	15.1	42.331	391	391;390;392;1067	0	56.632	By MS/MS	By MS/MS	By MS/MS		By matching		102270000	84293000	60146000	0	4893900	0
P38606	P38606	2	2	2	V-type proton ATPase catalytic subunit A	ATP6V1A	1	5.7	5.7	5.7	68.303	617	617	0	13.253							0	0	0	0	0	0
P38646	P38646	25	25	25	Stress-70 protein, mitochondrial	HSPA9	1	44.8	44.8	44.8	73.68	679	679	0	297.36	By MS/MS	By MS/MS	By MS/MS	By MS/MS	By MS/MS	By MS/MS	234300000	188230000	87049000	966710000	1141000000	459150000
P38919	P38919	5	4	4	Eukaryotic initiation factor 4A-III;Eukaryotic initiation factor 4A-III, N-terminally processed	EIF4A3	1	15.8	11.9	11.9	46.871	411	411	0	25.91	By MS/MS	By MS/MS	By MS/MS	By MS/MS	By MS/MS	By MS/MS	9249700	9040500	5390000	9214000	11298000	6532800
P39019	P39019	13	13	13	40S ribosomal protein S19	RPS19	1	62.8	62.8	62.8	16.06	145	145	0	104.15	By MS/MS	By MS/MS	By MS/MS	By MS/MS	By MS/MS	By MS/MS	1729900000	1440500000	504720000	86621000	245040000	33318000
P39023;Q92901	P39023	27;3	27;3	27;3	60S ribosomal protein L3	RPL3	2	54.1	54.1	54.1	46.108	403	403;407	0	323.31	By MS/MS	By MS/MS	By MS/MS	By MS/MS	By MS/MS	By MS/MS	6848000000	4976300000	1833500000	207710000	910350000	299920000
P40121	P40121	1	1	1	Macrophage-capping protein	CAPG	1	3.4	3.4	3.4	38.498	348	348	0.0087566	8.3022							0	0	0	0	0	0
P40227	P40227	5	5	5	T-complex protein 1 subunit zeta	CCT6A	1	13.6	13.6	13.6	58.024	531	531	0	62.257		By matching		By MS/MS	By matching	By MS/MS	0	6158000	0	18427000	13528000	7203600
P40429;Q6NVV1	P40429	12;3	12;3	12;3	60S ribosomal protein L13a	RPL13A	2	45.3	45.3	45.3	23.577	203	203;102	0	106.79	By MS/MS	By MS/MS	By MS/MS	By MS/MS	By MS/MS	By MS/MS	2613800000	2174100000	756780000	111920000	328330000	98695000
P40926	P40926	6	6	6	Malate dehydrogenase, mitochondrial	MDH2	1	26.6	26.6	26.6	35.503	338	338	0	72.183							0	0	0	0	0	0
P40938	P40938	2	2	2	Replication factor C subunit 3	RFC3	1	7.9	7.9	7.9	40.556	356	356	0	15.723	By MS/MS	By MS/MS					0	0	0	0	0	0
P41091;Q2VIR3	P41091;Q2VIR3	22;18	22;18	22;18	Eukaryotic translation initiation factor 2 subunit 3;Putative eukaryotic translation initiation factor 2 subunit 3-like protein	EIF2S3;EIF2S3L	2	49.8	49.8	49.8	51.109	472	472;472	0	319.73	By MS/MS	By MS/MS	By MS/MS	By MS/MS	By MS/MS	By matching	1213500000	1138300000	374530000	47707000	228450000	30052000
Q9BSU3;P41227	Q9BSU3;P41227	1;1	1;1	1;1	N-alpha-acetyltransferase 11;N-alpha-acetyltransferase 10	NAA11;NAA10	2	10	10	10	25.979	229	229;235	1	-2				By matching	By MS/MS		0	0	0	1848600	18739000	0
P41250	P41250	13	13	13	Glycine--tRNA ligase	GARS	1	22.7	22.7	22.7	83.165	739	739	0	159.39	By matching	By matching	By matching	By MS/MS	By MS/MS	By MS/MS	15169000	5084200	886440	201700000	282240000	45653000
P42167;P42166	P42167;P42166	2;1	2;1	2;1	Lamina-associated polypeptide 2, isoforms beta/gamma;Thymopoietin;Thymopentin;Lamina-associated polypeptide 2, isoform alpha;Thymopoietin;Thymopentin	TMPO	2	7	7	7	50.67	454	454;694	0	14.618			By matching	By matching	By MS/MS		0	0	919760	3487000	8610800	0
P42224	P42224	7	7	7	Signal transducer and activator of transcription 1-alpha/beta	STAT1	1	12.3	12.3	12.3	87.334	750	750	0	45.715		By matching		By MS/MS	By MS/MS	By MS/MS	0	4361700	0	32324000	43683000	14599000
P42285	P42285	14	14	14	Superkiller viralicidic activity 2-like 2	SKIV2L2	1	18.1	18.1	18.1	117.8	1042	1042	0	160.06	By MS/MS	By MS/MS	By MS/MS				69840000	64394000	29756000	0	0	0
P42357	P42357	5	5	5	Histidine ammonia-lyase	HAL	1	11	11	11	72.697	657	657	0	37.748	By matching	By matching		By MS/MS	By matching	By matching	15284000	8245100	0	5985500	13768000	1661800
P42677	P42677	6	6	4	40S ribosomal protein S27	RPS27	1	45.2	45.2	20.2	9.461	84	84	0	65.425	By MS/MS	By MS/MS	By MS/MS	By MS/MS	By MS/MS	By MS/MS	234830000	239860000	86574000	257320000	510600000	245430000
P42696	P42696	3	3	3	RNA-binding protein 34	RBM34	1	8.4	8.4	8.4	48.564	430	430	0	31.203	By MS/MS	By MS/MS	By MS/MS				29754000	6927600	6578900	0	0	0
P42704	P42704	3	3	3	Leucine-rich PPR motif-containing protein, mitochondrial	LRPPRC	1	2.7	2.7	2.7	157.9	1394	1394	0	19.026		By matching	By matching	By MS/MS	By MS/MS	By matching	0	1380200	550900	8243300	15931000	2254800
P42766	P42766	9	9	9	60S ribosomal protein L35	RPL35	1	38.2	38.2	38.2	14.551	123	123	0	150.02	By MS/MS	By MS/MS	By MS/MS	By MS/MS	By MS/MS	By MS/MS	2337900000	2247200000	798300000	152800000	489750000	101150000
P43243	P43243	18	18	18	Matrin-3	MATR3	1	28.6	28.6	28.6	94.622	847	847	0	323.31	By MS/MS	By MS/MS	By MS/MS	By matching	By MS/MS	By matching	384360000	323590000	128910000	9696400	86855000	4998600
P43307	P43307	2	2	2	Translocon-associated protein subunit alpha	SSR1	1	8	8	8	32.235	286	286	0	28.376		By matching		By MS/MS	By MS/MS	By MS/MS	0	891300	0	100710000	144350000	54388000
P43358;P43355;P43362;P43361;A2A368;A8MXT2;Q96M61;O15480;O60732	P43358	4;1;1;1;1;1;1;1;1	4;1;1;1;1;1;1;1;1	2;0;0;0;0;0;0;0;0	Melanoma-associated antigen 4	MAGEA4	9	13.6	13.6	6	34.899	317	317;309;315;318;324;336;343;346;1142	0	23.834	By MS/MS	By MS/MS	By matching	By MS/MS	By MS/MS	By MS/MS	0	2447300	4026800	52504000	66894000	21439000
P43363	P43363	3	1	1	Melanoma-associated antigen 10	MAGEA10	1	9.5	3	3	40.78	369	369	0	13.687	By matching	By matching	By matching	By MS/MS	By matching	By matching	0	0	0	10396000	6011700	0
P43487	P43487	1	1	1	Ran-specific GTPase-activating protein	RANBP1	1	5.5	5.5	5.5	23.31	201	201	0.0084388	7.2355				By MS/MS	By matching		0	0	0	7749800	14312000	0
P43490	P43490	7	7	7	Nicotinamide phosphoribosyltransferase	NAMPT	1	20.2	20.2	20.2	55.52	491	491	0	76.86			By matching	By MS/MS	By MS/MS	By MS/MS	0	0	1150800	68021000	82767000	29848000
P43686	P43686	5	5	5	26S protease regulatory subunit 6B	PSMC4	1	14.8	14.8	14.8	47.366	418	418	0	33.957	By matching	By matching	By matching	By MS/MS	By MS/MS	By MS/MS	1119400	9607600	2235300	31805000	45287000	11552000
P45880	P45880	5	5	5	Voltage-dependent anion-selective channel protein 2	VDAC2	1	26.9	26.9	26.9	31.566	294	294	0	34.808	By matching		By matching	By MS/MS	By MS/MS	By matching	10914000	0	1750900	24565000	35280000	10182000
P45974	P45974	1	1	1	Ubiquitin carboxyl-terminal hydrolase 5	USP5	1	2.2	2.2	2.2	95.785	858	858	0	50.265							0	0	0	0	0	0
P46087	P46087	17	17	17	Probable 28S rRNA (cytosine(4447)-C(5))-methyltransferase	NOP2	1	26.6	26.6	26.6	89.301	812	812	0	126.66	By MS/MS	By MS/MS	By MS/MS	By matching	By MS/MS	By matching	493830000	271230000	126160000	6123100	38537000	2914600
P46776	P46776	10	10	10	60S ribosomal protein L27a	RPL27A	1	45.9	45.9	45.9	16.561	148	148	0	113.5	By MS/MS	By MS/MS	By MS/MS	By MS/MS	By MS/MS	By MS/MS	2809600000	2249400000	875170000	126750000	407640000	94593000
P46777	P46777	13	13	13	60S ribosomal protein L5	RPL5	1	36.7	36.7	36.7	34.362	297	297	0	127.31	By MS/MS	By MS/MS	By MS/MS	By MS/MS	By MS/MS	By matching	404280000	416610000	156340000	29682000	88462000	7828900
P46778	P46778	11	11	11	60S ribosomal protein L21	RPL21	1	52.5	52.5	52.5	18.565	160	160	0	111.87	By MS/MS	By MS/MS	By MS/MS	By MS/MS	By MS/MS	By MS/MS	2343000000	1525800000	595900000	100590000	283340000	118840000
P46779	P46779	14	14	14	60S ribosomal protein L28	RPL28	1	62.8	62.8	62.8	15.747	137	137	0	119.77	By MS/MS	By MS/MS	By MS/MS	By MS/MS	By MS/MS	By MS/MS	2674700000	2276100000	751270000	162840000	464180000	156480000
P46781	P46781	20	20	20	40S ribosomal protein S9	RPS9	1	62.9	62.9	62.9	22.591	194	194	0	162.95	By MS/MS	By MS/MS	By MS/MS	By MS/MS	By MS/MS	By MS/MS	5197300000	4431900000	1915600000	348520000	878240000	216940000
P46782	P46782	12	12	12	40S ribosomal protein S5;40S ribosomal protein S5, N-terminally processed	RPS5	1	46.6	46.6	46.6	22.876	204	204	0	211.23	By MS/MS	By MS/MS	By MS/MS	By MS/MS	By MS/MS	By MS/MS	638820000	603160000	166690000	236390000	901100000	313710000
P46783;Q9NQ39	P46783;Q9NQ39	6;3	6;3	6;3	40S ribosomal protein S10;Putative 40S ribosomal protein S10-like	RPS10;RPS10P5	2	34.5	34.5	34.5	18.898	165	165;176	0	56.374	By MS/MS	By MS/MS	By MS/MS	By MS/MS	By MS/MS	By MS/MS	128130000	179160000	48711000	87109000	181820000	47792000
P46821;P78559	P46821	5;1	5;1	5;1	Microtubule-associated protein 1B;MAP1B heavy chain;MAP1 light chain LC1	MAP1B	2	3.6	3.6	3.6	270.63	2468	2468;2803	0	42.427	By matching	By matching	By MS/MS	By MS/MS	By MS/MS		6918700	11133000	4999700	0	0	0
P46940;Q13576;Q86VI3	P46940	28;1;1	28;1;1	28;1;1	Ras GTPase-activating-like protein IQGAP1	IQGAP1	3	23.9	23.9	23.9	189.25	1657	1657;1575;1631	0	305.25	By MS/MS	By MS/MS	By MS/MS	By matching	By MS/MS		218100000	183650000	66660000	7556300	38021000	0
P47755	P47755	3	2	2	F-actin-capping protein subunit alpha-2	CAPZA2	1	14.7	11.2	11.2	32.949	286	286	0	33.142	By matching	By matching	By matching	By matching	By matching	By matching	0	0	0	4130200	7747700	0
P47756	P47756	3	3	3	F-actin-capping protein subunit beta	CAPZB	1	17.7	17.7	17.7	31.35	277	277	0	30.123	By matching		By matching	By matching	By matching	By matching	6875100	0	3292900	12133000	12934000	5232900
P47895	P47895	5	5	5	Aldehyde dehydrogenase family 1 member A3	ALDH1A3	1	13.9	13.9	13.9	56.108	512	512	0	41.259				By MS/MS	By MS/MS	By MS/MS	0	0	0	34109000	39894000	3980400
P47914	P47914	4	4	4	60S ribosomal protein L29	RPL29	1	21.4	21.4	21.4	17.752	159	159	0	40.354	By MS/MS	By MS/MS	By MS/MS	By MS/MS	By MS/MS	By MS/MS	1560100000	1116600000	384190000	90383000	220170000	44393000
P47929	P47929	6	6	6	Galectin-7	LGALS7	1	56.6	56.6	56.6	15.075	136	136	0	45.853	By matching	By matching	By MS/MS	By MS/MS	By matching	By matching	18872000	14482000	18239000	28544000	11188000	2785800
P48047	P48047	5	5	5	ATP synthase subunit O, mitochondrial	ATP5O	1	32.9	32.9	32.9	23.277	213	213	0	35.881	By MS/MS	By MS/MS	By matching	By MS/MS	By MS/MS	By matching	39738000	22760000	9801000	48497000	31594000	15149000
P48444	P48444	6	6	6	Coatomer subunit delta	ARCN1	1	17.4	17.4	17.4	57.21	511	511	0	43.816	By MS/MS	By MS/MS	By MS/MS	By matching	By matching	By matching	36031000	26705000	12737000	15443000	24236000	3254400
P48507	P48507	1	1	1	Glutamate--cysteine ligase regulatory subunit	GCLM	1	4.7	4.7	4.7	30.727	274	274	0.0098119	6.9125				By MS/MS	By MS/MS		0	0	0	5160000	12435000	0
P48594	P48594	9	2	2	Serpin B4	SERPINB4	1	23.3	7.2	7.2	44.853	390	390	0	16.244	By MS/MS	By matching	By matching	By matching	By matching	By matching	4451100	0	9047100	0	0	0
P48643	P48643	17	17	17	T-complex protein 1 subunit epsilon	CCT5	1	39.4	39.4	39.4	59.67	541	541	0	244.25	By matching	By MS/MS	By matching	By MS/MS	By MS/MS	By MS/MS	27924000	17952000	11670000	211370000	293040000	111000000
P48651	P48651	2	2	2	Phosphatidylserine synthase 1	PTDSS1	1	5.7	5.7	5.7	55.527	473	473	0.0028736	11.918	By MS/MS	By matching	By matching				6082300	3603600	785480	0	0	0
P48668	P48668	70	8	3	Keratin, type II cytoskeletal 6C	KRT6C	1	70.6	12.2	4.4	60.024	564	564	0	95.497	By MS/MS	By matching	By matching	By matching	By MS/MS	By MS/MS	47703000	31735000	6534400	27293000	192920000	71936000
P48681	P48681	19	19	19	Nestin	NES	1	15.1	15.1	15.1	177.44	1621	1621	0	218.53	By MS/MS	By MS/MS	By MS/MS	By matching	By matching		104430000	91268000	80588000	2847000	4086800	0
P49207	P49207	9	9	9	60S ribosomal protein L34	RPL34	1	41.9	41.9	41.9	13.293	117	117	0	59.009	By MS/MS	By MS/MS	By MS/MS	By MS/MS	By MS/MS	By MS/MS	1705700000	1453700000	509870000	84099000	264140000	102850000
P49327	P49327	20	20	20	Fatty acid synthase;[Acyl-carrier-protein] S-acetyltransferase;[Acyl-carrier-protein] S-malonyltransferase;3-oxoacyl-[acyl-carrier-protein] synthase;3-oxoacyl-[acyl-carrier-protein] reductase;3-hydroxyacyl-[acyl-carrier-protein] dehydratase;Enoyl-[acyl-carrier-protein] reductase;Oleoyl-[acyl-carrier-protein] hydrolase	FASN	1	11.8	11.8	11.8	273.42	2511	2511	0	254.25	By matching	By MS/MS	By MS/MS	By MS/MS	By MS/MS	By MS/MS	25344000	20184000	13221000	120550000	108160000	35872000
P49366	P49366	12	12	12	Deoxyhypusine synthase	DHPS	1	43.9	43.9	43.9	40.97	369	369	0	145.69	By MS/MS	By MS/MS	By MS/MS	By MS/MS	By MS/MS	By matching	196260000	98217000	54311000	29386000	35631000	7967900
P49368	P49368	13	13	13	T-complex protein 1 subunit gamma	CCT3	1	31.2	31.2	31.2	60.533	545	545	0	101.17	By MS/MS	By matching	By MS/MS	By MS/MS	By MS/MS	By MS/MS	14128000	11652000	6568100	198350000	269270000	77544000
P49406	P49406	3	3	3	39S ribosomal protein L19, mitochondrial	MRPL19	1	11	11	11	33.535	292	292	0	17.532	By MS/MS	By MS/MS	By matching				8389300	9261100	7323300	0	0	0
P49411	P49411	18	18	18	Elongation factor Tu, mitochondrial	TUFM	1	47.1	47.1	47.1	49.541	452	452	0	232.73	By MS/MS	By MS/MS	By MS/MS	By MS/MS	By MS/MS	By MS/MS	159030000	117930000	83465000	506650000	722870000	259330000
P49458	P49458	2	2	2	Signal recognition particle 9 kDa protein	SRP9	1	20.9	20.9	20.9	10.112	86	86	0.0028874	11.993							0	0	0	0	0	0
P49588	P49588	2	2	2	Alanine--tRNA ligase, cytoplasmic	AARS	1	2.6	2.6	2.6	106.81	968	968	0.00096618	12.065				By matching	By MS/MS	By matching	0	0	0	5420800	8578900	3305300
P49593	P49593	2	2	2	Protein phosphatase 1F	PPM1F	1	10.4	10.4	10.4	49.83	454	454	0.0047125	11.593				By MS/MS	By matching	By MS/MS	0	0	0	13778000	5336300	5104300
P49711;Q8NI51	P49711	4;1	4;1	4;1	Transcriptional repressor CTCF	CTCF	2	7	7	7	82.785	727	727;663	0	47.59	By MS/MS	By MS/MS	By MS/MS		By matching		35885000	11428000	4671800	0	7500800	0
P49721	P49721	2	2	2	Proteasome subunit beta type-2	PSMB2	1	9.5	9.5	9.5	22.836	201	201	0	12.127	By matching	By matching	By MS/MS	By MS/MS	By MS/MS		7043600	10156000	2892700	0	0	0
P49755	P49755	1	1	1	Transmembrane emp24 domain-containing protein 10	TMED10	1	4.1	4.1	4.1	24.976	219	219	0.009159	7.0672	By matching	By matching	By matching	By matching	By matching		6631600	4767600	4009200	3307300	5081500	0
P49773	P49773	1	1	1	Histidine triad nucleotide-binding protein 1	HINT1	1	15.9	15.9	15.9	13.802	126	126	0.008569	7.5085					By MS/MS		0	0	0	0	16168000	0
P49915	P49915	3	3	3	GMP synthase [glutamine-hydrolyzing]	GMPS	1	5.1	5.1	5.1	76.715	693	693	0	18.242				By MS/MS	By MS/MS	By matching	0	0	0	19529000	34971000	4069400
P50238	P50238	1	1	1	Cysteine-rich protein 1	CRIP1	1	18.2	18.2	18.2	8.5328	77	77	0	12.93							0	0	0	0	0	0
P50395;P31150	P50395	3;1	3;1	3;1	Rab GDP dissociation inhibitor beta	GDI2	2	8.5	8.5	8.5	50.663	445	445;447	0	20.996	By MS/MS	By MS/MS	By MS/MS	By matching			6840700	4891900	4835600	4534300	0	0
P50402	P50402	2	2	2	Emerin	EMD	1	11.4	11.4	11.4	28.994	254	254	0	14.482	By matching			By matching	By MS/MS	By matching	2948900	0	0	20709000	25136000	4697400
P50454	P50454	5	5	5	Serpin H1	SERPINH1	1	16.3	16.3	16.3	46.44	418	418	0	43.246	By matching	By matching	By matching	By MS/MS	By MS/MS	By MS/MS	1966400	827620	601250	38994000	46014000	18892000
P50579	P50579	8	8	8	Methionine aminopeptidase 2	METAP2	1	21.5	21.5	21.5	52.891	478	478	0	59.692	By MS/MS	By MS/MS	By MS/MS	By matching	By MS/MS		62079000	44770000	17162000	9918600	6184500	0
P50914	P50914	9	9	9	60S ribosomal protein L14	RPL14	1	42.8	42.8	42.8	23.432	215	215	0	106.46	By MS/MS	By MS/MS	By MS/MS	By MS/MS	By MS/MS	By MS/MS	3532900000	2845000000	1099400000	169350000	498160000	176860000
P50990	P50990	12	12	12	T-complex protein 1 subunit theta	CCT8	1	23.9	23.9	23.9	59.62	548	548	0	86.985			By matching	By MS/MS	By MS/MS	By MS/MS	0	0	2989400	132910000	175070000	46395000
P50991	P50991	10	10	10	T-complex protein 1 subunit delta	CCT4	1	26.7	26.7	26.7	57.924	539	539	0	146.66	By matching	By matching	By matching	By MS/MS	By MS/MS	By MS/MS	7687900	7250700	3549400	83701000	173590000	35420000
P51114	P51114	13	13	11	Fragile X mental retardation syndrome-related protein 1	FXR1	1	23	23	20.5	69.72	621	621	0	86.743	By MS/MS	By MS/MS	By MS/MS	By matching	By matching	By matching	187260000	184530000	87145000	8313100	16606000	6256300
P51116	P51116	10	8	7	Fragile X mental retardation syndrome-related protein 2	FXR2	1	23	20.7	17.8	74.222	673	673	0	69.772	By MS/MS	By MS/MS	By matching	By matching	By matching	By matching	76046000	52604000	9619800	0	2970000	0
P51148	P51148	1	1	1	Ras-related protein Rab-5C	RAB5C	1	5.6	5.6	5.6	23.482	216	216	0.0098441	6.9232				By matching	By MS/MS	By matching	0	0	0	7375600	5443000	2877900
P51149	P51149	2	2	2	Ras-related protein Rab-7a	RAB7A	1	11.6	11.6	11.6	23.489	207	207	0	23.713							0	0	0	0	0	0
P51398	P51398	6	6	6	28S ribosomal protein S29, mitochondrial	DAP3	1	21.9	21.9	21.9	45.566	398	398	0	45.852	By MS/MS	By MS/MS	By MS/MS	By matching	By matching		4600200000	33941000	24005000	267180000	35152000	0
P51571	P51571	1	1	1	Translocon-associated protein subunit delta	SSR4	1	6.4	6.4	6.4	18.998	173	173	0.0086207	7.6323				By MS/MS	By MS/MS	By MS/MS	0	0	0	11745000	8988000	4296100
P51648	P51648	4	4	4	Fatty aldehyde dehydrogenase	ALDH3A2	1	9.7	9.7	9.7	54.847	485	485	0	26.495		By matching		By MS/MS	By MS/MS	By MS/MS	0	1122200	0	29120000	40936000	10288000
P51649	P51649	3	3	3	Succinate-semialdehyde dehydrogenase, mitochondrial	ALDH5A1	1	6.5	6.5	6.5	57.214	535	535	0	21.003	By MS/MS	By MS/MS	By MS/MS	By matching	By MS/MS		35434000	20970000	11066000	6313100	22554000	0
P51665	P51665	2	2	2	26S proteasome non-ATPase regulatory subunit 7	PSMD7	1	6.2	6.2	6.2	37.025	324	324	0.0046948	11.552		By matching	By matching	By MS/MS	By MS/MS		0	2608400	1899100	11482000	16094000	0
P51991	P51991	19	18	18	Heterogeneous nuclear ribonucleoprotein A3	HNRNPA3	1	45.8	43.9	43.9	39.594	378	378	0	207.28	By MS/MS	By MS/MS	By MS/MS	By matching	By MS/MS	By matching	367690000	249480000	104480000	23580000	40304000	9891200
P52209	P52209	2	2	2	6-phosphogluconate dehydrogenase, decarboxylating	PGD	1	7.9	7.9	7.9	53.139	483	483	0	21.811							0	0	0	0	0	0
P52272	P52272	43	43	42	Heterogeneous nuclear ribonucleoprotein M	HNRNPM	1	58.9	58.9	56.2	77.515	730	730	0	323.31	By MS/MS	By MS/MS	By MS/MS	By MS/MS	By MS/MS	By MS/MS	1963500000	1330100000	437720000	131880000	147830000	62790000
P52292	P52292	5	5	5	Importin subunit alpha-1	KPNA2	1	14.4	14.4	14.4	57.861	529	529	0	44.1	By matching	By matching	By matching		By matching		15998000	7220400	4450500	0	4455600	0
P52298	P52298	1	1	1	Nuclear cap-binding protein subunit 2	NCBP2	1	7.1	7.1	7.1	18.001	156	156	0.0088968	9.7443	By MS/MS	By MS/MS			By matching		17891000	8557200	0	0	4366300	0
P52434	P52434	4	4	4	DNA-directed RNA polymerases I, II, and III subunit RPABC3	POLR2H	1	32	32	32	17.143	150	150	0	45.374	By MS/MS	By MS/MS	By MS/MS	By MS/MS	By MS/MS	By MS/MS	22330000	20193000	10101000	19128000	21808000	1887400
P52565	P52565	2	2	2	Rho GDP-dissociation inhibitor 1	ARHGDIA	1	24	24	24	23.207	204	204	0	61.527							0	0	0	0	0	0
P52566	P52566	2	2	2	Rho GDP-dissociation inhibitor 2	ARHGDIB	1	14.4	14.4	14.4	22.988	201	201	0	32.249	By matching					By matching	21679000	0	0	0	0	11256000
P52597	P52597	11	9	9	Heterogeneous nuclear ribonucleoprotein F;Heterogeneous nuclear ribonucleoprotein F, N-terminally processed	HNRNPF	1	40.2	33.7	33.7	45.671	415	415	0	323.31	By MS/MS	By MS/MS	By MS/MS	By MS/MS	By MS/MS	By MS/MS	923560000	493540000	246980000	63983000	144700000	56690000
P52630	P52630	1	1	1	Signal transducer and activator of transcription 2	STAT2	1	2.8	2.8	2.8	97.915	851	851	0	13.827				By MS/MS	By matching		0	0	0	5924400	4549200	0
P52732	P52732	62	62	62	Kinesin-like protein KIF11	KIF11	1	55.8	55.8	55.8	119.16	1056	1056	0	323.31	By MS/MS	By MS/MS	By MS/MS	By MS/MS	By MS/MS	By MS/MS	3058200000	2456100000	1446900000	2396600000	3903200000	3073800000
P52789	P52789	8	8	8	Hexokinase-2	HK2	1	12.1	12.1	12.1	102.38	917	917	0	45.835				By MS/MS	By MS/MS	By MS/MS	0	0	0	19983000	61012000	12410000
P52815	P52815	3	3	3	39S ribosomal protein L12, mitochondrial	MRPL12	1	11.6	11.6	11.6	21.348	198	198	0	30.693	By MS/MS	By MS/MS	By matching				30030000	26170000	10815000	0	0	0
P52907	P52907	5	5	4	F-actin-capping protein subunit alpha-1	CAPZA1	1	26.9	26.9	23.4	32.922	286	286	0	51.259	By MS/MS	By matching	By matching	By MS/MS	By MS/MS	By matching	13562000	9693300	4544800	25372000	72659000	7276900
P53007	P53007	2	2	2	Tricarboxylate transport protein, mitochondrial	SLC25A1	1	7.4	7.4	7.4	34.012	311	311	0	14.242	By matching	By matching		By MS/MS	By MS/MS	By matching	7195600	1876800	0	34471000	39750000	4223900
P53618	P53618	22	22	22	Coatomer subunit beta	COPB1	1	33.8	33.8	33.8	107.14	953	953	0	270.64	By MS/MS	By MS/MS	By MS/MS	By MS/MS	By MS/MS	By matching	266900000	185740000	108440000	132900000	169240000	42808000
P53621	P53621	36	36	36	Coatomer subunit alpha;Xenin;Proxenin	COPA	1	38.7	38.7	38.7	138.34	1224	1224	0	323.31	By MS/MS	By MS/MS	By MS/MS	By MS/MS	By MS/MS	By MS/MS	436800000	387820000	210830000	199420000	311010000	47910000
P53634	P53634	2	2	2	Dipeptidyl peptidase 1;Dipeptidyl peptidase 1 exclusion domain chain;Dipeptidyl peptidase 1 heavy chain;Dipeptidyl peptidase 1 light chain	CTSC	1	5	5	5	51.853	463	463	0	14.528	By matching	By matching		By MS/MS	By MS/MS	By matching	12434000	5050400	0	35009000	56616000	14877000
P53985	P53985	4	4	4	Monocarboxylate transporter 1	SLC16A1	1	10.6	10.6	10.6	53.944	500	500	0	22.178				By MS/MS	By MS/MS	By matching	0	0	0	32970000	36363000	23181000
P54105	P54105	1	1	1	Methylosome subunit pICln	CLNS1A	1	5.5	5.5	5.5	26.215	237	237	0.0087951	8.6728		By MS/MS		By matching	By matching	By matching	0	22346000	0	9193100	14254000	1345800
P54652	P54652	17	2	2	Heat shock-related 70 kDa protein 2	HSPA2	1	20	1.9	1.9	70.02	639	639	0.0028681	11.864	By matching	By matching	By matching	By MS/MS	By MS/MS	By MS/MS	7178200	0	0	78035000	105180000	51677000
P55000	P55000	1	1	1	Secreted Ly-6/uPAR-related protein 1	SLURP1	1	24.3	24.3	24.3	11.186	103	103	0	38.707		By MS/MS					0	12111000	0	0	0	0
P55036;A2A3N6	P55036	9;1	9;1	9;1	26S proteasome non-ATPase regulatory subunit 4	PSMD4	2	35.5	35.5	35.5	40.736	377	377;862	0	252.95	By MS/MS	By MS/MS	By MS/MS	By MS/MS	By MS/MS	By MS/MS	253790000	163860000	140460000	91143000	235230000	61355000
P55060	P55060	2	2	2	Exportin-2	CSE1L	1	2.5	2.5	2.5	110.42	971	971	0	13.453					By MS/MS		0	0	0	0	291090000	0
P55072	P55072	30	30	30	Transitional endoplasmic reticulum ATPase	VCP	1	48.5	48.5	48.5	89.321	806	806	0	323.31	By MS/MS	By MS/MS	By MS/MS	By MS/MS	By MS/MS		401270000	431890000	222460000	57732000	136410000	0
P55209;Q99733	P55209	5;1	5;1	5;1	Nucleosome assembly protein 1-like 1	NAP1L1	2	17.4	17.4	17.4	45.374	391	391;375	0	66.655	By MS/MS	By MS/MS	By MS/MS	By matching	By MS/MS		178100000	120170000	70607000	23588000	40703000	0
P55265	P55265	13	13	13	Double-stranded RNA-specific adenosine deaminase	ADAR	1	12.9	12.9	12.9	136.06	1226	1226	0	90.918	By MS/MS	By MS/MS	By MS/MS	By matching	By matching		98043000	87747000	27534000	4362500	6133200	0
P55769	P55769	2	2	2	NHP2-like protein 1;NHP2-like protein 1, N-terminally processed	NHP2L1	1	18.8	18.8	18.8	14.173	128	128	0	15.193	By matching	By MS/MS	By MS/MS	By matching	By matching	By matching	23623000	17899000	11778000	4905100	12612000	3168200
P55795	P55795	6	1	1	Heterogeneous nuclear ribonucleoprotein H2	HNRNPH2	1	18.9	4.7	4.7	49.263	449	449	0	19.371	By matching	By matching	By matching	By matching	By matching	By matching	0	0	0	0	0	0
P55884	P55884	15	15	15	Eukaryotic translation initiation factor 3 subunit B	EIF3B	1	27.6	27.6	27.6	92.48	814	814	0	97.507	By MS/MS	By MS/MS	By MS/MS	By matching	By MS/MS	By matching	129110000	143200000	84163000	32225000	46366000	8453000
P56134	P56134	1	1	1	ATP synthase subunit f, mitochondrial	ATP5J2	1	13.8	13.8	13.8	10.918	94	94	0.0088889	9.7116	By matching			By MS/MS	By matching	By MS/MS	2422500	0	0	8510100	24849000	9241000
P56182	P56182	1	1	1	Ribosomal RNA processing protein 1 homolog A	RRP1	1	2.8	2.8	2.8	52.839	461	461	0.0085034	7.3036	By MS/MS	By MS/MS					0	0	0	0	0	0
P56537	P56537	6	6	6	Eukaryotic translation initiation factor 6	EIF6	1	40.8	40.8	40.8	26.599	245	245	0	131.38	By MS/MS	By MS/MS	By MS/MS	By MS/MS	By MS/MS	By MS/MS	67081000	31800000	11031000	31563000	92556000	13458000
P57088	P57088	3	3	3	Transmembrane protein 33	TMEM33	1	12.1	12.1	12.1	27.978	247	247	0	20.677	By matching		By matching	By MS/MS	By MS/MS	By matching	5752800	0	1398600	25600000	104570000	21061000
P58107	P58107	8	4	4	Epiplakin	EPPK1	1	10.1	5.2	5.2	555.61	5090	5090	0	43.759	By matching	By matching	By matching	By matching	By matching	By matching	0	6118700	2391200	0	0	3960900
P58546	P58546	1	1	1	Myotrophin	MTPN	1	23.7	23.7	23.7	12.895	118	118	0.0073059	11.057							0	0	0	0	0	0
P59666;P59665	P59666;P59665	2;2	2;2	2;2	Neutrophil defensin 3;HP 3-56;Neutrophil defensin 2;Neutrophil defensin 1;HP 1-56;Neutrophil defensin 2	DEFA3;DEFA1	2	19.1	19.1	19.1	10.245	94	94;94	0	12.852	By MS/MS	By MS/MS	By matching			By matching	242310000	30087000	6119300	0	0	5860100
P59998	P59998	2	2	2	Actin-related protein 2/3 complex subunit 4	ARPC4	1	11.3	11.3	11.3	19.667	168	168	0.0064635	11.197							0	0	0	0	0	0
P60174	P60174	10	10	10	Triosephosphate isomerase	TPI1	1	33.9	33.9	33.9	30.791	286	286	0	73.266	By matching	By MS/MS	By matching	By MS/MS	By MS/MS	By matching	17311000	11176000	1950300	19715000	23355000	2628200
P60228	P60228	6	6	6	Eukaryotic translation initiation factor 3 subunit E	EIF3E	1	13.9	13.9	13.9	52.22	445	445	0	39.239	By MS/MS	By MS/MS	By MS/MS	By MS/MS	By matching	By matching	19039000	30501000	14590000	1880800	14076000	2939800
P60468	P60468	2	2	2	Protein transport protein Sec61 subunit beta	SEC61B	1	26	26	26	9.9743	96	96	0	13.715	By MS/MS	By MS/MS	By matching	By matching	By MS/MS	By matching	8818500	18408000	8617900	54979000	59390000	16809000
P60510	P60510	1	1	1	Serine/threonine-protein phosphatase 4 catalytic subunit	PPP4C	1	4.2	4.2	4.2	35.08	307	307	0.0085179	7.3607							0	0	0	0	0	0
P60660;P14649	P60660	11;2	11;2	11;2	Myosin light polypeptide 6	MYL6	2	67.5	67.5	67.5	16.93	151	151;208	0	231.62	By MS/MS	By MS/MS	By MS/MS	By MS/MS	By MS/MS	By matching	241790000	163780000	109160000	39480000	66250000	3992200
P60709;Q6S8J3;A5A3E0;Q562R1;P0CG38;P0CG39;Q9BYX7	P60709	32;9;8;7;7;5;4	32;9;8;7;7;5;4	1;0;0;0;0;0;0	Actin, cytoplasmic 1;Actin, cytoplasmic 1, N-terminally processed	ACTB	7	76.3	76.3	4.5	41.736	375	375;1075;1075;376;1075;1038;375	0	323.31	By MS/MS	By MS/MS	By MS/MS	By MS/MS	By MS/MS	By MS/MS	829480000	623020000	301250000	2707700000	3813600000	1549300000
P60842;Q14240	P60842	13;6	13;6	12;5	Eukaryotic initiation factor 4A-I	EIF4A1	2	32	32	28.1	46.153	406	406;407	0	125.48	By MS/MS	By MS/MS	By MS/MS	By MS/MS	By MS/MS	By MS/MS	146550000	65222000	42041000	399590000	613390000	227640000
P60866	P60866	7	7	7	40S ribosomal protein S20	RPS20	1	38.7	38.7	38.7	13.373	119	119	0	75.38	By MS/MS	By MS/MS	By MS/MS	By MS/MS	By MS/MS	By MS/MS	1386600000	1267400000	346950000	224780000	505610000	176470000
P60891;P21108;P11908	P60891;P21108	3;2;1	3;2;1	3;2;1	Ribose-phosphate pyrophosphokinase 1;Ribose-phosphate pyrophosphokinase 3	PRPS1;PRPS1L1	3	13.5	13.5	13.5	34.834	318	318;318;318	0	19.935	By matching	By matching		By MS/MS	By MS/MS	By MS/MS	3007400	1291900	0	12515000	26949000	8140000
P60900	P60900	4	4	4	Proteasome subunit alpha type-6	PSMA6	1	17.9	17.9	17.9	27.399	246	246	0	26.026	By MS/MS	By MS/MS	By matching	By MS/MS	By MS/MS	By matching	24589000	14858000	6539200	33546000	27519000	8828000
P60903	P60903	2	2	2	Protein S100-A10	S100A10	1	27.8	27.8	27.8	11.203	97	97	0	16.756	By MS/MS	By MS/MS	By matching	By MS/MS	By MS/MS	By MS/MS	46140000	5381500	2341200	50082000	53406000	8949200
P60953	P60953	3	3	3	Cell division control protein 42 homolog	CDC42	1	19.9	19.9	19.9	21.258	191	191	0	63.763	By MS/MS	By MS/MS	By MS/MS	By MS/MS	By MS/MS		17523000	31594000	7857400	12665000	9681900	0
P60981	P60981	3	1	1	Destrin	DSTN	1	14.5	7.3	7.3	18.506	165	165	0.0084317	7.2271					By MS/MS	By MS/MS	0	0	0	0	12519000	12976000
P61026	P61026	3	2	2	Ras-related protein Rab-10	RAB10	1	17	11.5	11.5	22.541	200	200	0	13.618	By matching	By matching	By matching	By MS/MS	By matching	By matching	1198200	0	494730	10183000	6261800	5743900
P61106	P61106	2	2	2	Ras-related protein Rab-14	RAB14	1	20.9	20.9	20.9	23.897	215	215	0	24.014				By MS/MS	By MS/MS	By matching	0	0	0	9623900	60227000	20982000
P61158;Q9C0K3;Q9P1U1	P61158	8;1;1	8;1;1	8;1;1	Actin-related protein 3	ACTR3	3	30.4	30.4	30.4	47.371	418	418;210;418	0	93.259							0	0	0	0	0	0
P61160	P61160	2	2	2	Actin-related protein 2	ACTR2	1	7.9	7.9	7.9	44.76	394	394	0	14.646							0	0	0	0	0	0
P61163;P42025	P61163	5;1	5;1	5;1	Alpha-centractin	ACTR1A	2	22.1	22.1	22.1	42.613	376	376;376	0	62.414	By MS/MS	By MS/MS	By MS/MS	By MS/MS	By MS/MS	By MS/MS	46675000	27524000	15036000	48826000	93859000	22440000
P84077;P61204	P84077;P61204	8;8	5;5	4;4	ADP-ribosylation factor 1;ADP-ribosylation factor 3	ARF1;ARF3	2	47	29.8	24.3	20.697	181	181;181	0	35.674	By matching	By matching	By matching	By MS/MS	By MS/MS	By MS/MS	64252000	35315000	34474000	177450000	201350000	114270000
P61247	P61247	26	26	26	40S ribosomal protein S3a	RPS3A	1	72.7	72.7	72.7	29.945	264	264	0	323.31	By MS/MS	By MS/MS	By MS/MS	By MS/MS	By MS/MS	By MS/MS	6815800000	5172600000	1969400000	405640000	1155300000	265660000
P61254	P61254	14	14	5	60S ribosomal protein L26	RPL26	1	49.7	49.7	14.5	17.258	145	145	0	123.97	By MS/MS	By MS/MS	By MS/MS	By MS/MS	By MS/MS	By MS/MS	3138300000	2438500000	796500000	231570000	553710000	125220000
P61313	P61313	15	15	15	60S ribosomal protein L15	RPL15	1	51.5	51.5	51.5	24.146	204	204	0	202.32	By MS/MS	By MS/MS	By MS/MS	By MS/MS	By MS/MS	By MS/MS	6021800000	4224700000	1473100000	262710000	756280000	229330000
P61353	P61353	11	11	11	60S ribosomal protein L27	RPL27	1	60.3	60.3	60.3	15.798	136	136	0	165.59	By MS/MS	By MS/MS	By MS/MS	By MS/MS	By MS/MS	By MS/MS	3623300000	2520600000	1148700000	155760000	540120000	124100000
P61513;A6NKH3	P61513	7;1	7;1	7;1	60S ribosomal protein L37a	RPL37A	2	59.8	59.8	59.8	10.275	92	92;93	0	213.53	By MS/MS	By MS/MS	By MS/MS		By MS/MS	By MS/MS	731750000	601810000	157890000	0	105710000	19801000
P61604	P61604	2	2	2	10 kDa heat shock protein, mitochondrial	HSPE1	1	18.6	18.6	18.6	10.932	102	102	0	12.775							0	0	0	0	0	0
P61626	P61626	6	6	6	Lysozyme C	LYZ	1	52.7	52.7	52.7	16.537	148	148	0	107.18	By MS/MS	By MS/MS	By MS/MS	By MS/MS	By MS/MS	By MS/MS	50394000	301370000	15459000	67783000	65190000	10727000
P61769	P61769	2	2	2	Beta-2-microglobulin;Beta-2-microglobulin form pI 5.3	B2M	1	16.8	16.8	16.8	13.714	119	119	0	14.041		By MS/MS	By matching	By matching	By MS/MS	By matching	0	17455000	2420100	27626000	32628000	5226700
P61923	P61923	1	1	1	Coatomer subunit zeta-1	COPZ1	1	7.9	7.9	7.9	20.198	177	177	0.0089366	9.9119				By MS/MS	By MS/MS		0	0	0	1246400	1515500	0
P61927	P61927	4	4	4	60S ribosomal protein L37	RPL37	1	35.1	35.1	35.1	11.078	97	97	0	21.926	By matching	By MS/MS	By matching		By matching	By matching	21809000	27584000	4938200	0	5623300	5657000
P61964	P61964	4	4	4	WD repeat-containing protein 5	WDR5	1	16.2	16.2	16.2	36.588	334	334	0	28.044	By MS/MS	By MS/MS	By MS/MS				47363000	23037000	6896400	0	0	0
P61978	P61978	25	25	25	Heterogeneous nuclear ribonucleoprotein K	HNRNPK	1	57	57	57	50.976	463	463	0	323.31	By MS/MS	By MS/MS	By MS/MS	By MS/MS	By MS/MS	By MS/MS	2080500000	1842000000	727740000	224500000	685610000	91502000
P61981	P61981	8	5	4	14-3-3 protein gamma;14-3-3 protein gamma, N-terminally processed	YWHAG	1	33.2	25.9	19.4	28.302	247	247	0	84.105	By MS/MS	By MS/MS	By MS/MS	By MS/MS	By MS/MS	By MS/MS	31579000	28484000	23090000	23776000	35676000	11444000
P62081	P62081	14	14	14	40S ribosomal protein S7	RPS7	1	52.1	52.1	52.1	22.127	194	194	0	323.31	By MS/MS	By MS/MS	By MS/MS	By MS/MS	By MS/MS	By MS/MS	2153500000	2029200000	565550000	166690000	409500000	82314000
P62136	P62136	8	1	1	Serine/threonine-protein phosphatase PP1-alpha catalytic subunit	PPP1CA	1	27.9	4.2	4.2	37.512	330	330	0.009901	6.9679	By matching	By matching	By matching	By matching	By matching	By matching	0	0	1273900	0	0	0
P62140	P62140	9	9	2	Serine/threonine-protein phosphatase PP1-beta catalytic subunit	PPP1CB	1	32.1	32.1	8.3	37.186	327	327	0	121.23	By MS/MS	By MS/MS	By MS/MS	By matching	By MS/MS	By matching	64106000	45209000	7822600	10709000	11658000	1143300
P62191	P62191	5	5	5	26S protease regulatory subunit 4	PSMC1	1	15.9	15.9	15.9	49.184	440	440	0	44.915	By matching	By MS/MS	By matching	By MS/MS	By MS/MS	By matching	13218000	8120700	3115200	40729000	40439000	17616000
P62195	P62195	3	3	3	26S protease regulatory subunit 8	PSMC5	1	11.3	11.3	11.3	45.626	406	406	0	21.544	By matching	By MS/MS	By MS/MS	By MS/MS	By MS/MS	By matching	5156600	7085100	5642400	15890000	41244000	9359100
P62241	P62241	16	16	16	40S ribosomal protein S8	RPS8	1	59.6	59.6	59.6	24.205	208	208	0	323.31	By MS/MS	By MS/MS	By MS/MS	By MS/MS	By MS/MS	By MS/MS	5271200000	4295400000	2019600000	166120000	1039900000	151540000
P62244	P62244	10	10	10	40S ribosomal protein S15a	RPS15A	1	77.7	77.7	77.7	14.839	130	130	0	96.129	By MS/MS	By MS/MS	By MS/MS	By MS/MS	By MS/MS	By MS/MS	1399900000	1261000000	443020000	319190000	604820000	216820000
P62249	P62249	17	17	17	40S ribosomal protein S16	RPS16	1	64.4	64.4	64.4	16.445	146	146	0	142.74	By MS/MS	By MS/MS	By MS/MS	By MS/MS	By MS/MS	By MS/MS	1957800000	1821500000	701510000	314710000	618320000	232420000
P62258	P62258	12	9	9	14-3-3 protein epsilon	YWHAE	1	44.3	37.3	37.3	29.174	255	255	0	66.677	By MS/MS	By MS/MS	By MS/MS	By MS/MS	By MS/MS	By MS/MS	79693000	57637000	40411000	56946000	44152000	15474000
P62263	P62263	11	11	11	40S ribosomal protein S14	RPS14	1	43	43	43	16.273	151	151	0	224.61	By MS/MS	By MS/MS	By MS/MS	By MS/MS	By MS/MS	By MS/MS	2209100000	1842700000	821790000	203690000	489460000	129680000
P62266	P62266	7	7	7	40S ribosomal protein S23	RPS23	1	49	49	49	15.807	143	143	0	71.77	By MS/MS	By MS/MS	By MS/MS	By MS/MS	By MS/MS	By MS/MS	1405300000	1402800000	469090000	87954000	251080000	56989000
P62269	P62269	20	20	20	40S ribosomal protein S18	RPS18	1	65.8	65.8	65.8	17.718	152	152	0	189.54	By MS/MS	By MS/MS	By MS/MS	By MS/MS	By MS/MS	By MS/MS	3259200000	2955000000	1060000000	389340000	781060000	336840000
P62273	P62273	3	3	3	40S ribosomal protein S29	RPS29	1	33.9	33.9	33.9	6.6767	56	56	0	20.875	By MS/MS	By MS/MS	By MS/MS	By MS/MS	By MS/MS	By MS/MS	267680000	246190000	82258000	22899000	78008000	20881000
P62277	P62277	13	13	13	40S ribosomal protein S13	RPS13	1	58.3	58.3	58.3	17.222	151	151	0	191.06	By MS/MS	By MS/MS	By MS/MS	By MS/MS	By MS/MS	By MS/MS	3363900000	3319900000	1285500000	227390000	686420000	90750000
P62280	P62280	15	15	15	40S ribosomal protein S11	RPS11	1	62	62	62	18.431	158	158	0	236.24	By MS/MS	By MS/MS	By MS/MS	By MS/MS	By MS/MS	By MS/MS	3053000000	2691100000	1056800000	196220000	703880000	112340000
P62304	P62304	2	2	2	Small nuclear ribonucleoprotein E	SNRPE	1	25	25	25	10.803	92	92	0	14.347	By MS/MS	By MS/MS	By MS/MS		By matching		36091000	28655000	17891000	0	16709000	0
P62306	P62306	5	5	5	Small nuclear ribonucleoprotein F	SNRPF	1	41.9	41.9	41.9	9.7251	86	86	0	136.33	By MS/MS	By MS/MS	By MS/MS	By MS/MS	By MS/MS		50063000	44063000	17990000	0	12833000	0
P62314	P62314	4	4	4	Small nuclear ribonucleoprotein Sm D1	SNRPD1	1	37	37	37	13.281	119	119	0	53.114	By MS/MS	By MS/MS	By MS/MS	By MS/MS	By MS/MS	By matching	148590000	232740000	105310000	35178000	110070000	6382300
P62316	P62316	8	8	8	Small nuclear ribonucleoprotein Sm D2	SNRPD2	1	55.1	55.1	55.1	13.527	118	118	0	66.742	By MS/MS	By MS/MS	By MS/MS	By MS/MS	By MS/MS	By matching	171280000	184360000	102120000	80411000	153110000	43918000
P62318	P62318	4	4	4	Small nuclear ribonucleoprotein Sm D3	SNRPD3	1	37.3	37.3	37.3	13.916	126	126	0	217.58	By MS/MS	By MS/MS	By MS/MS	By MS/MS	By MS/MS	By matching	360590000	187220000	134140000	59556000	101720000	9451600
P62328	P62328	3	3	3	Thymosin beta-4;Hematopoietic system regulatory peptide	TMSB4X	1	86.4	86.4	86.4	5.0526	44	44	0	71.826							0	0	0	0	0	0
P62424	P62424	23	23	23	60S ribosomal protein L7a	RPL7A	1	51.9	51.9	51.9	29.995	266	266	0	323.31	By MS/MS	By MS/MS	By MS/MS	By MS/MS	By MS/MS	By MS/MS	5790600000	4635700000	2055600000	273280000	1017400000	261860000
P62491;Q15907	P62491;Q15907	2;2	2;2	2;2	Ras-related protein Rab-11A;Ras-related protein Rab-11B	RAB11A;RAB11B	2	10.6	10.6	10.6	24.393	216	216;218	0	12.271	By matching	By matching	By matching				4114800	7189700	2910400	0	0	0
P62495	P62495	14	14	14	Eukaryotic peptide chain release factor subunit 1	ETF1	1	34.3	34.3	34.3	49.03	437	437	0	121.43	By MS/MS	By MS/MS	By MS/MS	By MS/MS	By MS/MS	By matching	207100000	224020000	155350000	14195000	108830000	4304400
P62633	P62633	8	8	8	Cellular nucleic acid-binding protein	CNBP	1	52	52	52	19.463	177	177	0	81.783	By MS/MS	By MS/MS	By MS/MS		By MS/MS	By matching	239370000	189340000	58678000	0	39075000	2819300
P62701;Q8TD47;P22090	P62701	27;12;10	27;12;10	27;12;10	40S ribosomal protein S4, X isoform	RPS4X	3	72.2	72.2	72.2	29.597	263	263;263;263	0	323.31	By MS/MS	By MS/MS	By MS/MS	By MS/MS	By MS/MS	By MS/MS	7799200000	6071600000	2395300000	407910000	1122400000	298430000
P67775;P62714	P67775;P62714	4;4	4;4	4;4	Serine/threonine-protein phosphatase 2A catalytic subunit alpha isoform;Serine/threonine-protein phosphatase 2A catalytic subunit beta isoform	PPP2CA;PPP2CB	2	13.6	13.6	13.6	35.594	309	309;309	0	23.024	By MS/MS	By matching	By matching	By MS/MS	By MS/MS		7481700	5838200	4180000	0	18643000	0
P62750	P62750	16	16	16	60S ribosomal protein L23a	RPL23A	1	55.1	55.1	55.1	17.695	156	156	0	176.07	By MS/MS	By MS/MS	By MS/MS	By MS/MS	By MS/MS	By MS/MS	3496000000	2794400000	1099900000	227950000	486300000	107220000
P62753	P62753	18	18	18	40S ribosomal protein S6	RPS6	1	51.4	51.4	51.4	28.68	249	249	0	323.31	By MS/MS	By MS/MS	By MS/MS	By MS/MS	By MS/MS	By MS/MS	3354100000	2628600000	975950000	117130000	552780000	154050000
P62805	P62805	12	12	12	Histone H4	HIST1H4A	1	64.1	64.1	64.1	11.367	103	103	0	149.47	By MS/MS	By MS/MS	By MS/MS	By MS/MS	By MS/MS	By MS/MS	1313700000	907710000	561900000	120810000	393580000	107760000
P62826	P62826	11	11	11	GTP-binding nuclear protein Ran	RAN	1	46.8	46.8	46.8	24.423	216	216	0	85.942	By MS/MS	By MS/MS	By MS/MS	By MS/MS	By MS/MS	By MS/MS	127190000	91553000	31718000	446520000	588090000	392730000
P62829	P62829	9	9	9	60S ribosomal protein L23	RPL23	1	52.9	52.9	52.9	14.865	140	140	0	160.55	By MS/MS	By MS/MS	By MS/MS	By MS/MS	By MS/MS	By MS/MS	1898300000	1597600000	478160000	143640000	476850000	94121000
P62841	P62841	7	7	7	40S ribosomal protein S15	RPS15	1	46.2	46.2	46.2	17.04	145	145	0	52.537	By MS/MS	By MS/MS	By MS/MS	By MS/MS	By MS/MS	By matching	1832700000	1304600000	368000000	270430000	303750000	112780000
P62847	P62847	7	7	7	40S ribosomal protein S24	RPS24	1	41.4	41.4	41.4	15.423	133	133	0	117.66	By MS/MS	By MS/MS	By MS/MS	By MS/MS	By MS/MS	By MS/MS	1114200000	706640000	271630000	93439000	146280000	52262000
P62851	P62851	9	9	9	40S ribosomal protein S25	RPS25	1	55.2	55.2	55.2	13.742	125	125	0	90.839	By MS/MS	By MS/MS	By MS/MS	By MS/MS	By MS/MS	By MS/MS	2640000000	2146100000	932940000	177740000	456210000	125230000
P62854;Q5JNZ5	P62854;Q5JNZ5	5;4	5;4	5;4	40S ribosomal protein S26;Putative 40S ribosomal protein S26-like 1	RPS26;RPS26P11	2	39.1	39.1	39.1	13.015	115	115;115	0	83.447	By MS/MS	By MS/MS	By MS/MS	By MS/MS	By MS/MS	By MS/MS	1459700000	1282500000	488830000	117700000	297660000	74446000
P62857	P62857	3	3	3	40S ribosomal protein S28	RPS28	1	44.9	44.9	44.9	7.8409	69	69	0	40.493	By MS/MS	By MS/MS	By matching		By matching		5663100	3322200	740120	0	3244400	0
P62861	P62861	3	3	3	40S ribosomal protein S30	FAU	1	20.3	20.3	20.3	6.6478	59	59	0	22.054	By MS/MS	By MS/MS	By MS/MS	By MS/MS	By MS/MS	By MS/MS	492750000	406730000	198430000	22532000	84608000	16687000
P62873	P62873	5	1	1	Guanine nucleotide-binding protein G(I)/G(S)/G(T) subunit beta-1	GNB1	1	15.3	4.1	4.1	37.377	340	340	0.0085106	7.3363	By matching	By matching	By matching	By matching	By matching	By matching	0	0	0	2152600	37082000	0
P62879;Q9HAV0;P16520	P62879;Q9HAV0	8;4;2	8;4;2	4;1;0	Guanine nucleotide-binding protein G(I)/G(S)/G(T) subunit beta-2;Guanine nucleotide-binding protein subunit beta-4	GNB2;GNB4	3	25.9	25.9	14.7	37.331	340	340;340;340	0	49.525	By matching	By matching	By matching	By matching	By MS/MS	By MS/MS	13831000	2612100	1197300	56578000	72051000	31739000
P62888	P62888	8	8	8	60S ribosomal protein L30	RPL30	1	59.1	59.1	59.1	12.784	115	115	0	170.37	By MS/MS	By MS/MS	By MS/MS	By MS/MS	By MS/MS	By MS/MS	1722800000	1270300000	544700000	39101000	324070000	69568000
Q59GN2;P62891	Q59GN2;P62891	2;2	2;2	2;2	Putative 60S ribosomal protein L39-like 5;60S ribosomal protein L39	RPL39P5;RPL39	2	23.5	23.5	23.5	6.3225	51	51;51	0	13.909	By MS/MS	By MS/MS	By MS/MS	By matching	By MS/MS	By MS/MS	321790000	298330000	129020000	16900000	67090000	10783000
P62899	P62899	9	9	9	60S ribosomal protein L31	RPL31	1	47.2	47.2	47.2	14.463	125	125	0	148.39	By MS/MS	By MS/MS	By MS/MS	By MS/MS	By MS/MS	By MS/MS	2326200000	1636900000	586150000	111470000	408760000	73147000
P62906	P62906	13	13	13	60S ribosomal protein L10a	RPL10A	1	52.5	52.5	52.5	24.831	217	217	0	224.65	By MS/MS	By MS/MS	By MS/MS	By MS/MS	By MS/MS	By MS/MS	4085100000	2932400000	1145200000	148480000	591960000	159960000
P62910	P62910	14	14	14	60S ribosomal protein L32	RPL32	1	55.6	55.6	55.6	15.86	135	135	0	251.16	By MS/MS	By MS/MS	By MS/MS	By MS/MS	By MS/MS	By MS/MS	2288500000	1668100000	556380000	117010000	357350000	91852000
P62913	P62913	14	14	14	60S ribosomal protein L11	RPL11	1	53.4	53.4	53.4	20.252	178	178	0	197.79	By MS/MS	By MS/MS	By MS/MS	By MS/MS	By MS/MS	By MS/MS	2520100000	2013600000	717520000	277280000	571960000	195560000
P62917	P62917	21	21	21	60S ribosomal protein L8	RPL8	1	57.2	57.2	57.2	28.024	257	257	0	323.31	By MS/MS	By MS/MS	By MS/MS	By MS/MS	By MS/MS	By MS/MS	4696800000	3627500000	1334700000	216460000	491730000	142940000
P62937;P0DN26;A0A0B4J2A2;A0A075B759;Q9Y536;F5H284;P0DN37	P62937	11;2;2;2;2;2;1	11;2;2;2;2;2;1	11;2;2;2;2;2;1	Peptidyl-prolyl cis-trans isomerase A;Peptidyl-prolyl cis-trans isomerase A, N-terminally processed	PPIA	7	74.5	74.5	74.5	18.012	165	165;164;164;164;164;164;164	0	185.2	By MS/MS	By MS/MS	By MS/MS	By MS/MS	By MS/MS	By MS/MS	80813000	62903000	47727000	86532000	130860000	76408000
P62979;P0CG47;P0CG48	P62979;P0CG47;P0CG48	8;5;5	8;5;5	3;0;0	Ubiquitin-40S ribosomal protein S27a;Ubiquitin;40S ribosomal protein S27a;Polyubiquitin-B;Ubiquitin;Polyubiquitin-C;Ubiquitin	RPS27A;UBB;UBC	3	52.6	52.6	21.2	17.965	156	156;229;685	0	245.12	By MS/MS	By MS/MS	By MS/MS	By MS/MS	By MS/MS	By MS/MS	946990000	887840000	345090000	659150000	963740000	524220000
P62987	P62987	6	1	1	Ubiquitin-60S ribosomal protein L40;Ubiquitin;60S ribosomal protein L40	UBA52	1	46.1	7.8	7.8	14.728	128	128	0.0089206	9.8618	By MS/MS	By MS/MS	By matching	By matching	By MS/MS	By matching	62591000	69007000	0	0	21893000	0
P62995	P62995	5	5	5	Transformer-2 protein homolog beta	TRA2B	1	18.4	18.4	18.4	33.665	288	288	0	35.533	By MS/MS	By MS/MS	By MS/MS		By matching		55685000	47086000	19874000	0	4482600	0
P63010;Q10567	P63010	11;4	11;4	11;4	AP-2 complex subunit beta	AP2B1	2	16.3	16.3	16.3	104.55	937	937;949	0	107.75	By MS/MS	By MS/MS	By MS/MS	By matching	By matching		91400000	53953000	22758000	3071800	5407200	0
P63104	P63104	14	14	10	14-3-3 protein zeta/delta	YWHAZ	1	62.9	62.9	51.8	27.745	245	245	0	323.31	By MS/MS	By MS/MS	By MS/MS	By MS/MS	By MS/MS	By MS/MS	137660000	157880000	78178000	136690000	251130000	71796000
P63151;Q66LE6;Q00005;Q9Y2T4	P63151;Q66LE6	5;3;2;1	5;3;2;1	5;3;2;1	Serine/threonine-protein phosphatase 2A 55 kDa regulatory subunit B alpha isoform;Serine/threonine-protein phosphatase 2A 55 kDa regulatory subunit B delta isoform	PPP2R2A;PPP2R2D	4	15	15	15	51.691	447	447;453;443;447	0	50.766	By MS/MS	By matching	By MS/MS	By MS/MS	By MS/MS	By MS/MS	11890000	11697000	6273000	43003000	58522000	26151000
P63167;Q96FJ2	P63167;Q96FJ2	4;2	4;2	4;2	Dynein light chain 1, cytoplasmic;Dynein light chain 2, cytoplasmic	DYNLL1;DYNLL2	2	62.9	62.9	62.9	10.366	89	89;89	0	30.256	By MS/MS	By MS/MS	By MS/MS	By matching	By MS/MS	By MS/MS	64254000	44231000	19062000	5171700	36962000	8831800
P63173	P63173	6	6	6	60S ribosomal protein L38	RPL38	1	50	50	50	8.2178	70	70	0	48.518	By MS/MS	By MS/MS	By MS/MS	By MS/MS	By MS/MS	By MS/MS	524640000	463190000	181710000	119400000	207830000	63805000
P63208	P63208	1	1	1	S-phase kinase-associated protein 1	SKP1	1	7.4	7.4	7.4	18.658	163	163	0	27.282	By MS/MS	By MS/MS		By MS/MS	By MS/MS		0	0	0	9683500	0	0
P63220	P63220	2	2	2	40S ribosomal protein S21	RPS21	1	31.3	31.3	31.3	9.1113	83	83	0	21.787	By matching	By MS/MS	By matching	By matching	By MS/MS	By matching	5014000	2164700	1706700	2125200	3370700	3566900
Q9GZV4;Q6IS14;P63241	Q9GZV4;Q6IS14;P63241	4;4;4	4;4;4	4;4;4	Eukaryotic translation initiation factor 5A-2;Eukaryotic translation initiation factor 5A-1-like;Eukaryotic translation initiation factor 5A-1	EIF5A2;EIF5AL1;EIF5A	3	20.3	20.3	20.3	16.793	153	153;154;154	0	38.451	By MS/MS	By MS/MS	By MS/MS	By MS/MS	By MS/MS	By MS/MS	24086000	19738000	10740000	21100000	38833000	5502100
P63244	P63244	16	16	16	Guanine nucleotide-binding protein subunit beta-2-like 1;Guanine nucleotide-binding protein subunit beta-2-like 1, N-terminally processed	GNB2L1	1	59.6	59.6	59.6	35.076	317	317	0	167.24	By MS/MS	By MS/MS	By MS/MS	By MS/MS	By MS/MS	By MS/MS	155170000	104230000	38334000	267440000	739590000	248380000
P63261	P63261	32	1	1	Actin, cytoplasmic 2;Actin, cytoplasmic 2, N-terminally processed	ACTG1	1	76.3	4.5	4.5	41.792	375	375	0.0086806	7.8593	By matching	By matching	By matching	By matching	By matching	By matching	0	0	0	0	0	0
P63313	P63313	3	3	3	Thymosin beta-10	TMSB10	1	68.2	68.2	68.2	5.0256	44	44	0	35.402					By matching		0	0	0	0	16601000	0
P67809;Q9Y2T7	P67809	20;3	20;3	15;0	Nuclease-sensitive element-binding protein 1	YBX1	2	72.2	72.2	67.3	35.924	324	324;364	0	323.31	By MS/MS	By MS/MS	By MS/MS	By MS/MS	By MS/MS	By MS/MS	2329500000	1919400000	860610000	162940000	507650000	49902000
P68133;P68032;P63267;P62736	P68133;P68032;P63267;P62736	18;18;17;17	1;1;1;1	1;1;1;1	Actin, alpha skeletal muscle;Actin, alpha cardiac muscle 1;Actin, gamma-enteric smooth muscle;Actin, aortic smooth muscle	ACTA1;ACTC1;ACTG2;ACTA2	4	35	4.2	4.2	42.051	377	377;377;376;377	0.0084962	7.2904	By MS/MS	By matching	By matching	By MS/MS	By MS/MS	By MS/MS	33333000	7503700	2909700	60645000	117140000	46251000
Q5VTE0;P68104	Q5VTE0;P68104	17;17	17;17	9;9	Putative elongation factor 1-alpha-like 3;Elongation factor 1-alpha 1	EEF1A1P5;EEF1A1	2	47.6	47.6	26.2	50.184	462	462;462	0	323.31	By MS/MS	By MS/MS	By MS/MS	By MS/MS	By MS/MS	By MS/MS	663250000	560230000	249420000	1354100000	2049100000	788880000
P68363;A6NHL2;Q9H853	P68363	29;5;1	29;5;1	0;0;0	Tubulin alpha-1B chain	TUBA1B	3	68.7	68.7	0	50.151	451	451;446;241	0	323.31	By MS/MS	By MS/MS	By MS/MS	By MS/MS	By MS/MS	By MS/MS	775450000	397930000	223730000	3788300000	7690400000	2267700000
P68366	P68366	22	1	1	Tubulin alpha-4A chain	TUBA4A	1	54.9	4.5	4.5	49.924	448	448	1	-2	By matching	By matching	By matching	By matching	By matching	By matching	0	0	0	0	0	0
P68371	P68371	29	29	2	Tubulin beta-4B chain	TUBB4B	1	67.9	67.9	3.6	49.83	445	445	0	323.31	By MS/MS	By MS/MS	By MS/MS	By MS/MS	By MS/MS	By MS/MS	997380000	461260000	265600000	4148700000	7212800000	1908600000
P68431;Q16695;Q6NXT2	P68431;Q16695	5;4;2	1;0;0	1;0;0	Histone H3.1;Histone H3.1t	HIST1H3A;HIST3H3	3	43.4	23.5	23.5	15.404	136	136;136;135	0.0088028	8.7009	By matching	By matching	By matching	By matching	By matching	By matching	0	0	0	0	0	0
P68871	P68871	14	14	7	Hemoglobin subunit beta;LVV-hemorphin-7;Spinorphin	HBB	1	95.2	95.2	61.9	15.998	147	147	0	323.31	By MS/MS	By MS/MS	By MS/MS	By matching	By matching		27900000	82797000	18531000	8892300	4002600	0
P69905	P69905	8	8	8	Hemoglobin subunit alpha	HBA1	1	71.8	71.8	71.8	15.257	142	142	0	181.49	By MS/MS	By MS/MS	By matching	By MS/MS	By MS/MS	By MS/MS	42074000	44166000	28706000	25371000	32095000	6724200
P78316	P78316	12	12	12	Nucleolar protein 14	NOP14	1	16.2	16.2	16.2	97.667	857	857	0	83.19	By MS/MS	By MS/MS	By MS/MS	By matching	By matching	By matching	144050000	77368000	28164000	17320000	36138000	25885000
P78346	P78346	2	2	2	Ribonuclease P protein subunit p30	RPP30	1	7.1	7.1	7.1	29.321	268	268	0.0028763	11.938	By matching	By MS/MS	By MS/MS	By matching	By matching		2218900	1816000	1138000	1527700	2052100	0
P78358	P78358	3	3	3	Cancer/testis antigen 1	CTAG1A	1	36.7	36.7	36.7	17.992	180	180	0	30.53				By MS/MS	By MS/MS	By matching	0	0	0	24107000	34749000	9768700
P78362;Q9UPE1	P78362;Q9UPE1	3;2	1;0	1;0	SRSF protein kinase 2;SRSF protein kinase 2 N-terminal;SRSF protein kinase 2 C-terminal;SRSF protein kinase 3	SRPK2;SRPK3	2	4.8	1.7	1.7	77.526	688	688;567	0.0098603	6.9432	By matching	By MS/MS	By MS/MS				4812200	0	2346900	0	0	0
P78371	P78371	20	20	20	T-complex protein 1 subunit beta	CCT2	1	46.5	46.5	46.5	57.488	535	535	0	255.24	By matching	By MS/MS	By MS/MS	By MS/MS	By MS/MS	By MS/MS	49957000	5665300	8469800	308190000	450280000	138640000
P78386	P78386	21	6	6	Keratin, type II cuticular Hb5	KRT85	1	36.9	12.4	12.4	55.802	507	507	0	71.322	By matching	By matching	By matching	By matching	By matching	By matching	0	0	0	0	0	0
P78406	P78406	1	1	1	mRNA export factor	RAE1	1	4.1	4.1	4.1	40.968	368	368	0.0086881	7.886							0	0	0	0	0	0
P78527	P78527	7	7	7	DNA-dependent protein kinase catalytic subunit	PRKDC	1	2	2	2	469.08	4128	4128	0	40.432	By matching	By matching	By matching	By matching	By MS/MS	By matching	51574000	2513500	3629000	8021400	19543000	8471700
P81605	P81605	5	5	5	Dermcidin;Survival-promoting peptide;DCD-1	DCD	1	42.7	42.7	42.7	11.284	110	110	0	69.768	By MS/MS	By MS/MS	By MS/MS	By MS/MS	By MS/MS	By MS/MS	194850000	613580000	121320000	404920000	417630000	127520000
P82650	P82650	10	10	10	28S ribosomal protein S22, mitochondrial	MRPS22	1	31.4	31.4	31.4	41.28	360	360	0	74.373	By MS/MS	By MS/MS	By MS/MS		By matching		51800000	53845000	27079000	0	2479400	0
P82663	P82663	3	3	3	28S ribosomal protein S25, mitochondrial	MRPS25	1	15	15	15	20.116	173	173	0	21.391	By MS/MS	By MS/MS	By matching				20145000	15011000	2239900	0	0	0
P82673	P82673	3	3	3	28S ribosomal protein S35, mitochondrial	MRPS35	1	13	13	13	36.844	323	323	0	17.819	By matching	By matching	By matching		By matching		5773200	5394800	4886600	0	1862800	0
P82912	P82912	1	1	1	28S ribosomal protein S11, mitochondrial	MRPS11	1	14.9	14.9	14.9	20.616	194	194	0	14.594			By matching				0	0	2801500	0	0	0
P82930	P82930	5	5	5	28S ribosomal protein S34, mitochondrial	MRPS34	1	25.7	25.7	25.7	25.65	218	218	0	30.424	By MS/MS	By MS/MS	By MS/MS	By matching	By matching	By matching	44372000	49568000	22231000	17620000	5925900	10352000
P82932	P82932	2	2	2	28S ribosomal protein S6, mitochondrial	MRPS6	1	16.8	16.8	16.8	14.226	125	125	0.0064457	11.16	By matching	By MS/MS	By matching				7395400	6144000	1875900	0	0	0
P82933	P82933	4	4	4	28S ribosomal protein S9, mitochondrial	MRPS9	1	13.1	13.1	13.1	45.834	396	396	0	36.701	By MS/MS	By MS/MS	By MS/MS				17737000	28128000	8584700	0	0	0
P83731	P83731	9	9	9	60S ribosomal protein L24	RPL24	1	40.1	40.1	40.1	17.779	157	157	0	97.802	By MS/MS	By MS/MS	By MS/MS	By MS/MS	By MS/MS	By MS/MS	1756000000	1142400000	492620000	61946000	266360000	51401000
P83881	P83881	8	1	1	60S ribosomal protein L36a	RPL36A	1	35.8	9.4	9.4	12.441	106	106	0.0088183	8.8175	By MS/MS	By MS/MS	By MS/MS	By matching	By matching	By matching	71725000	57095000	14935000	0	10088000	0
P84090	P84090	8	8	8	Enhancer of rudimentary homolog	ERH	1	60.6	60.6	60.6	12.259	104	104	0	214.84	By MS/MS	By MS/MS	By MS/MS	By MS/MS	By MS/MS		495770000	388060000	177320000	10001000	11694000	0
P84098	P84098	13	13	13	60S ribosomal protein L19	RPL19	1	46.4	46.4	46.4	23.466	196	196	0	230.44	By MS/MS	By MS/MS	By MS/MS	By MS/MS	By MS/MS	By MS/MS	2634500000	2134400000	697620000	175810000	459870000	134780000
P84103	P84103	5	4	4	Serine/arginine-rich splicing factor 3	SRSF3	1	29.3	29.3	29.3	19.329	164	164	0	50.812	By MS/MS	By MS/MS	By MS/MS	By MS/MS	By MS/MS	By matching	365500000	272100000	115260000	21738000	79826000	0
P84243	P84243	5	1	1	Histone H3.3	H3F3A	1	43.4	23.5	23.5	15.328	136	136	0	28.563	By matching	By matching	By matching	By matching	By matching	By matching	0	0	0	0	0	0
P98175;P78332	P98175	17;1	17;1	17;1	RNA-binding protein 10	RBM10	2	23.9	23.9	23.9	103.53	930	930;1123	0	173.41	By MS/MS	By MS/MS	By MS/MS	By MS/MS	By MS/MS	By matching	336100000	346100000	141730000	19807000	54032000	4112400
P98179	P98179	2	2	2	RNA-binding protein 3	RBM3	1	19.1	19.1	19.1	17.17	157	157	0	27.927	By matching	By matching		By matching	By matching	By matching	14428000	1620000	0	5973900	13784000	9202900
P99999	P99999	2	2	2	Cytochrome c	CYCS	1	12.4	12.4	12.4	11.749	105	105	0	13.662							0	0	0	0	0	0
Q00325	Q00325	3	3	3	Phosphate carrier protein, mitochondrial	SLC25A3	1	7.2	7.2	7.2	40.094	362	362	0	18.77	By matching			By MS/MS	By MS/MS	By matching	2714000	0	0	42874000	51529000	23076000
Q00341	Q00341	1	1	1	Vigilin	HDLBP	1	1.2	1.2	1.2	141.45	1268	1268	0.0089286	9.889							0	0	0	0	0	0
Q00534	Q00534	2	2	1	Cyclin-dependent kinase 6	CDK6	1	6.1	6.1	3.7	36.938	326	326	0.0081522	10.751				By MS/MS	By MS/MS		0	0	0	0	0	0
Q00577	Q00577	4	4	4	Transcriptional activator protein Pur-alpha	PURA	1	18	18	18	34.91	322	322	0	145.51	By MS/MS	By MS/MS	By MS/MS		By matching	By matching	63854000	75619000	27591000	0	10541000	1854400
Q00610;P53675	Q00610	44;12	44;12	44;12	Clathrin heavy chain 1	CLTC	2	33.3	33.3	33.3	191.61	1675	1675;1640	0	323.31	By MS/MS	By MS/MS	By MS/MS	By MS/MS	By MS/MS	By matching	575520000	407690000	262290000	157700000	321730000	19543000
Q00839	Q00839	38	38	38	Heterogeneous nuclear ribonucleoprotein U	HNRNPU	1	45	45	45	90.583	825	825	0	323.31	By MS/MS	By MS/MS	By MS/MS	By MS/MS	By MS/MS	By MS/MS	3720600000	2893100000	1130000000	226560000	772970000	99379000
Q01082;P11277	Q01082	118;6	118;6	108;1	Spectrin beta chain, non-erythrocytic 1	SPTBN1	2	58.3	58.3	54.1	274.61	2364	2364;2137	0	323.31	By MS/MS	By MS/MS	By MS/MS	By MS/MS	By MS/MS	By matching	2700300000	2029900000	1246300000	240270000	460940000	27046000
Q01130;Q9BRL6	Q01130	8;2	8;2	8;2	Serine/arginine-rich splicing factor 2	SRSF2	2	33.9	33.9	33.9	25.476	221	221;282	0	93.092	By MS/MS	By MS/MS	By MS/MS	By MS/MS	By MS/MS	By matching	567850000	514980000	248480000	114810000	193070000	38821000
Q01469;A8MUU1	Q01469	13;3	13;3	13;3	Fatty acid-binding protein, epidermal	FABP5	2	60.7	60.7	60.7	15.164	135	135;101	0	240.66	By MS/MS	By MS/MS	By MS/MS	By MS/MS	By MS/MS	By MS/MS	38677000	68971000	13447000	45993000	83088000	29815000
Q01518	Q01518	2	2	2	Adenylyl cyclase-associated protein 1	CAP1	1	5.5	5.5	5.5	51.901	475	475	0	12.502							0	0	0	0	0	0
Q01650	Q01650	1	1	1	Large neutral amino acids transporter small subunit 1	SLC7A5	1	3.6	3.6	3.6	55.01	507	507	0	26.579				By MS/MS	By MS/MS	By MS/MS	0	0	0	13907000	17126000	7658700
Q01780	Q01780	17	17	17	Exosome component 10	EXOSC10	1	28.1	28.1	28.1	100.83	885	885	0	119.62	By MS/MS	By MS/MS	By MS/MS		By matching		135770000	126360000	42051000	0	6894100	0
Q01813	Q01813	5	5	5	ATP-dependent 6-phosphofructokinase, platelet type	PFKP	1	8.5	8.5	8.5	85.595	784	784	0	51.376	By matching	By matching		By MS/MS	By MS/MS	By MS/MS	3940700	2728400	0	36446000	66001000	14217000
Q02413	Q02413	24	24	24	Desmoglein-1	DSG1	1	32.2	32.2	32.2	113.75	1049	1049	0	323.31	By MS/MS	By MS/MS	By MS/MS	By MS/MS	By MS/MS	By MS/MS	740990000	207970000	108480000	262170000	438570000	116450000
Q02543	Q02543	16	16	16	60S ribosomal protein L18a	RPL18A	1	58	58	58	20.762	176	176	0	197.27	By MS/MS	By MS/MS	By MS/MS	By MS/MS	By MS/MS	By MS/MS	3336900000	2518700000	997290000	133040000	415740000	132390000
Q02878	Q02878	22	22	22	60S ribosomal protein L6	RPL6	1	54.5	54.5	54.5	32.728	288	288	0	323.31	By MS/MS	By MS/MS	By MS/MS	By MS/MS	By MS/MS	By MS/MS	8041600000	5405400000	2324500000	333930000	1211400000	283170000
Q02978	Q02978	6	6	6	Mitochondrial 2-oxoglutarate/malate carrier protein	SLC25A11	1	20.7	20.7	20.7	34.061	314	314	0	62.753	By MS/MS	By matching	By matching	By MS/MS	By MS/MS	By MS/MS	5688100	4697900	1645500	49092000	59526000	27614000
Q03135	Q03135	3	3	3	Caveolin-1	CAV1	1	30.3	30.3	30.3	20.471	178	178	0	43.171	By matching	By matching	By MS/MS		By matching		25018000	16943000	15126000	0	9482700	0
Q03393	Q03393	6	6	6	6-pyruvoyl tetrahydrobiopterin synthase	PTS	1	30.3	30.3	30.3	16.386	145	145	0	41.253	By MS/MS	By MS/MS	By MS/MS	By MS/MS	By MS/MS	By MS/MS	144270000	95631000	42411000	42088000	44698000	11937000
Q03701	Q03701	3	3	3	CCAAT/enhancer-binding protein zeta	CEBPZ	1	3.6	3.6	3.6	120.97	1054	1054	0	16.669	By matching	By matching	By MS/MS	By matching	By matching		23462000	8019600	2330700	3883300	5029100	0
Q04323	Q04323	4	4	4	UBX domain-containing protein 1	UBXN1	1	25.3	25.3	25.3	33.325	297	297	0	29.784			By matching	By MS/MS	By MS/MS		0	0	2481400	4285200	20136000	0
Q04637	Q04637	3	3	3	Eukaryotic translation initiation factor 4 gamma 1	EIF4G1	1	2.9	2.9	2.9	175.49	1599	1599	0	16.065	By matching	By matching	By matching		By matching		1379200	2356200	910220	0	2906200	0
Q04695	Q04695	46	26	23	Keratin, type I cytoskeletal 17	KRT17	1	73.6	51.4	47	48.105	432	432	0	323.31	By MS/MS	By MS/MS	By MS/MS	By MS/MS	By MS/MS	By MS/MS	3124400000	330580000	184790000	215780000	423810000	164560000
Q04756	Q04756	2	2	2	Hepatocyte growth factor activator;Hepatocyte growth factor activator short chain;Hepatocyte growth factor activator long chain	HGFAC	1	3.4	3.4	3.4	70.681	655	655	0	14.06							0	0	0	0	0	0
Q04837	Q04837	9	9	9	Single-stranded DNA-binding protein, mitochondrial	SSBP1	1	58.8	58.8	58.8	17.259	148	148	0	323.31	By MS/MS	By MS/MS	By MS/MS	By MS/MS	By MS/MS	By MS/MS	1061400000	797640000	399510000	314880000	366160000	134430000
Q04917	Q04917	5	2	2	14-3-3 protein eta	YWHAH	1	19.5	12.6	12.6	28.218	246	246	0	13.2	By matching	By matching	By matching	By matching	By matching	By matching	0	0	0	0	0	0
Q05639	Q05639	10	2	2	Elongation factor 1-alpha 2	EEF1A2	1	29.2	7.8	7.8	50.47	463	463	0	14.521	By matching	By MS/MS	By matching	By matching	By matching	By matching	5944300	5032400	2742200	0	3407500	0
Q06033	Q06033	3	3	3	Inter-alpha-trypsin inhibitor heavy chain H3	ITIH3	1	2.7	2.7	2.7	99.848	890	890	0	35.067			By matching				0	0	10725000	0	0	0
Q06210;O94808	Q06210	14;4	14;4	14;4	Glutamine--fructose-6-phosphate aminotransferase [isomerizing] 1	GFPT1	2	27	27	27	78.806	699	699;682	0	113.59	By matching	By matching		By MS/MS	By MS/MS	By MS/MS	13059000	1125800	0	108050000	196610000	47268000
Q06265	Q06265	4	4	4	Exosome complex component RRP45	EXOSC9	1	11.4	11.4	11.4	48.948	439	439	0	28.632	By MS/MS	By MS/MS	By MS/MS		By matching		61452000	50100000	21507000	0	8269900	0
Q06787	Q06787	3	1	1	Fragile X mental retardation protein 1	FMR1	1	6.5	2.2	2.2	71.174	632	632	0	17.365	By MS/MS	By MS/MS	By MS/MS			By matching	7916500	1346400	1498000	0	0	0
Q06830	Q06830	15	15	11	Peroxiredoxin-1	PRDX1	1	75.4	75.4	60.3	22.11	199	199	0	110.99	By MS/MS	By MS/MS	By MS/MS	By MS/MS	By MS/MS	By MS/MS	356540000	187130000	100490000	606850000	792170000	348830000
Q07020	Q07020	11	11	11	60S ribosomal protein L18	RPL18	1	45.2	45.2	45.2	21.634	188	188	0	224.88	By MS/MS	By MS/MS	By MS/MS	By MS/MS	By MS/MS	By MS/MS	5876500000	4466200000	2104300000	288000000	872020000	296290000
Q07021	Q07021	4	4	4	Complement component 1 Q subcomponent-binding protein, mitochondrial	C1QBP	1	26.2	26.2	26.2	31.362	282	282	0	38.435	By MS/MS	By MS/MS	By MS/MS		By MS/MS		26949000	26249000	12060000	0	34715000	0
Q07065	Q07065	6	6	6	Cytoskeleton-associated protein 4	CKAP4	1	15.4	15.4	15.4	66.022	602	602	0	60.738	By MS/MS	By MS/MS	By matching		By MS/MS	By matching	24680000	18103000	10240000	0	8971100	4106200
Q07352;P47974	Q07352;P47974	2;1	2;1	2;1	Zinc finger protein 36, C3H1 type-like 1;Zinc finger protein 36, C3H1 type-like 2	ZFP36L1;ZFP36L2	2	9.2	9.2	9.2	36.313	338	338;494	0	13.079	By matching	By MS/MS					8028800	5143400	0	0	0	0
Q07666	Q07666	5	5	5	KH domain-containing, RNA-binding, signal transduction-associated protein 1	KHDRBS1	1	23.3	23.3	23.3	48.227	443	443	0	134.78	By MS/MS	By MS/MS	By MS/MS		By matching		124370000	53044000	17460000	0	8843300	0
Q07955	Q07955	17	17	16	Serine/arginine-rich splicing factor 1	SRSF1	1	49.2	49.2	46.4	27.744	248	248	0	174.61	By MS/MS	By MS/MS	By MS/MS	By MS/MS	By MS/MS	By matching	990620000	827890000	429270000	82779000	218740000	38799000
Q08170	Q08170	6	2	2	Serine/arginine-rich splicing factor 4	SRSF4	1	12.6	5.5	5.5	56.678	494	494	0	19.106	By MS/MS	By matching	By matching	By matching	By matching	By matching	22399000	6644500	0	0	0	0
Q08188	Q08188	12	12	12	Protein-glutamine gamma-glutamyltransferase E;Protein-glutamine gamma-glutamyltransferase E 50 kDa catalytic chain;Protein-glutamine gamma-glutamyltransferase E 27 kDa non-catalytic chain	TGM3	1	20.8	20.8	20.8	76.631	693	693	0	234.21	By MS/MS	By MS/MS	By MS/MS	By MS/MS	By MS/MS	By MS/MS	85587000	42108000	24681000	57710000	65523000	25745000
Q08211	Q08211	51	51	51	ATP-dependent RNA helicase A	DHX9	1	47.8	47.8	47.8	140.96	1270	1270	0	323.31	By MS/MS	By MS/MS	By MS/MS	By MS/MS	By MS/MS	By MS/MS	2503900000	1919700000	793020000	108020000	379320000	22000000
Q08379	Q08379	2	2	2	Golgin subfamily A member 2	GOLGA2	1	2.2	2.2	2.2	113.08	1002	1002	0	13.795	By matching		By matching				1189800	0	664530	0	0	0
Q08380	Q08380	5	5	5	Galectin-3-binding protein	LGALS3BP	1	9.9	9.9	9.9	65.33	585	585	0	34.555	By matching	By matching	By matching	By matching	By matching	By matching	4558000	2683200	3457100	6171900	19100000	2393800
Q08554	Q08554	14	14	14	Desmocollin-1	DSC1	1	18.6	18.6	18.6	99.986	894	894	0	183.94	By MS/MS	By MS/MS	By MS/MS	By MS/MS	By MS/MS	By MS/MS	370310000	122270000	46181000	94381000	194040000	36665000
Q08J23	Q08J23	13	13	13	tRNA (cytosine(34)-C(5))-methyltransferase	NSUN2	1	22.6	22.6	22.6	86.47	767	767	0	96.418	By MS/MS	By MS/MS	By MS/MS	By matching	By matching		84978000	139110000	25508000	11329000	12727000	0
Q09028	Q09028	4	2	2	Histone-binding protein RBBP4	RBBP4	1	13.6	9.6	9.6	47.655	425	425	0	26.369	By MS/MS	By MS/MS	By MS/MS	By matching	By MS/MS		60138000	28701000	15140000	5237000	15530000	0
Q09161	Q09161	8	8	8	Nuclear cap-binding protein subunit 1	NCBP1	1	12.5	12.5	12.5	91.838	790	790	0	51.261	By MS/MS	By MS/MS	By MS/MS	By matching	By matching		52330000	36756000	19693000	2293000	6661800	0
Q10570	Q10570	3	3	3	Cleavage and polyadenylation specificity factor subunit 1	CPSF1	1	1.9	1.9	1.9	160.88	1443	1443	0	16.709	By matching	By MS/MS	By matching				5253900	6472200	3560300	0	0	0
Q12789	Q12789	17	17	17	General transcription factor 3C polypeptide 1	GTF3C1	1	11.5	11.5	11.5	238.87	2109	2109	0	136.11	By MS/MS	By MS/MS	By MS/MS		By matching		27806000	68877000	33795000	0	1110000	0
Q12797	Q12797	6	6	6	Aspartyl/asparaginyl beta-hydroxylase	ASPH	1	8	8	8	85.862	758	758	0	36.398	By MS/MS	By matching	By matching		By matching	By matching	20049000	11272000	3660800	0	574340	1528000
Q12849	Q12849	8	8	8	G-rich sequence factor 1	GRSF1	1	19	19	19	53.126	480	480	0	61.229	By MS/MS	By MS/MS	By MS/MS		By matching		87508000	66622000	20266000	0	7008800	0
Q12905	Q12905	18	18	18	Interleukin enhancer-binding factor 2	ILF2	1	48.7	48.7	48.7	43.062	390	390	0	271.49	By MS/MS	By MS/MS	By MS/MS	By MS/MS	By MS/MS	By MS/MS	973260000	734070000	346460000	66584000	269860000	40942000
Q12906	Q12906	31	31	26	Interleukin enhancer-binding factor 3	ILF3	1	35.2	35.2	32.1	95.337	894	894	0	323.31	By MS/MS	By MS/MS	By MS/MS	By MS/MS	By MS/MS	By matching	2263100000	1891900000	746040000	111480000	284740000	23051000
Q13151	Q13151	11	11	11	Heterogeneous nuclear ribonucleoprotein A0	HNRNPA0	1	44.9	44.9	44.9	30.84	305	305	0	202.99	By MS/MS	By MS/MS	By MS/MS	By matching	By MS/MS		340570000	233730000	115620000	16524000	55402000	0
Q13162	Q13162	5	2	2	Peroxiredoxin-4	PRDX4	1	15.9	8.9	8.9	30.54	271	271	0	14.498	By matching	By MS/MS	By matching	By matching	By MS/MS	By matching	2702400	948690	695550	2692400	2311400	0
Q13185;P83916	Q13185	3;1	3;1	3;1	Chromobox protein homolog 3	CBX3	2	23	23	23	20.811	183	183;185	0	32.914		By matching	By matching		By MS/MS	By matching	0	5463600	3229500	0	0	8011000
Q13200	Q13200	9	9	9	26S proteasome non-ATPase regulatory subunit 2	PSMD2	1	12.6	12.6	12.6	100.2	908	908	0	62.707	By MS/MS	By MS/MS	By matching	By MS/MS	By MS/MS	By matching	10926000	21222000	8813000	70062000	141250000	35330000
Q13242	Q13242	5	4	4	Serine/arginine-rich splicing factor 9	SRSF9	1	22.2	19	19	25.542	221	221	0	27.743	By MS/MS	By MS/MS	By MS/MS	By matching	By matching	By matching	41256000	25314000	14879000	0	0	0
Q13243	Q13243	5	4	4	Serine/arginine-rich splicing factor 5	SRSF5	1	22.4	19.1	19.1	31.263	272	272	0	39.365	By MS/MS	By MS/MS	By MS/MS	By matching	By matching	By matching	61884000	62564000	28183000	0	6928700	1601500
Q13247	Q13247	10	10	6	Serine/arginine-rich splicing factor 6	SRSF6	1	20.9	20.9	16.3	39.586	344	344	0	65.341	By MS/MS	By MS/MS	By MS/MS	By MS/MS	By MS/MS	By matching	849250000	774140000	396270000	131980000	258160000	42660000
Q13263	Q13263	10	10	10	Transcription intermediary factor 1-beta	TRIM28	1	16.4	16.4	16.4	88.549	835	835	0	148.42	By MS/MS	By MS/MS	By MS/MS	By MS/MS	By MS/MS	By MS/MS	51925000	46617000	22408000	17971000	30302000	4281900
Q13283	Q13283	13	13	12	Ras GTPase-activating protein-binding protein 1	G3BP1	1	34.5	34.5	32	52.164	466	466	0	265.07	By MS/MS	By MS/MS	By MS/MS	By MS/MS	By MS/MS	By matching	495440000	516410000	179490000	18286000	108620000	2171500
Q13310;P0CB38	Q13310	27;2	19;2	19;2	Polyadenylate-binding protein 4	PABPC4	2	40.4	25.5	25.5	70.782	644	644;370	0	163.1	By MS/MS	By MS/MS	By MS/MS	By MS/MS	By matching	By matching	578660000	479820000	195070000	43035000	68482000	13712000
Q13325	Q13325	1	1	1	Interferon-induced protein with tetratricopeptide repeats 5	IFIT5	1	2.3	2.3	2.3	55.846	482	482	0.0089526	10.082	By matching	By MS/MS	By matching	By matching	By MS/MS	By matching	2685700	5820200	959400	7866500	22840000	3087400
Q13347	Q13347	8	8	8	Eukaryotic translation initiation factor 3 subunit I	EIF3I	1	35.1	35.1	35.1	36.501	325	325	0	58.789	By MS/MS	By MS/MS	By MS/MS	By MS/MS	By MS/MS	By matching	94286000	42409000	23346000	21929000	14771000	3264700
Q13405	Q13405	3	3	3	39S ribosomal protein L49, mitochondrial	MRPL49	1	23.5	23.5	23.5	19.198	166	166	0	34.424	By matching	By matching	By MS/MS				11468000	14631000	5898400	0	0	0
Q13435	Q13435	14	14	14	Splicing factor 3B subunit 2	SF3B2	1	18.1	18.1	18.1	100.23	895	895	0	131.77	By MS/MS	By MS/MS	By MS/MS	By matching	By matching		266740000	131210000	58658000	1367600	12369000	0
Q13439	Q13439	57	57	57	Golgin subfamily A member 4	GOLGA4	1	29.8	29.8	29.8	261.14	2230	2230	0	323.31	By MS/MS	By MS/MS	By MS/MS	By MS/MS	By matching	By matching	446810000	383040000	241870000	50552000	44288000	8037200
Q13501	Q13501	8	8	8	Sequestosome-1	SQSTM1	1	23.2	23.2	23.2	47.687	440	440	0	121.49	By matching	By MS/MS	By MS/MS	By MS/MS	By MS/MS	By MS/MS	26789000	21507000	9756200	58225000	81774000	41011000
Q13509	Q13509	19	6	4	Tubulin beta-3 chain	TUBB3	1	44.9	19.3	14.7	50.432	450	450	0	55.284	By MS/MS	By MS/MS	By MS/MS	By MS/MS	By MS/MS	By MS/MS	19638000	16467000	8266100	103970000	155250000	45862000
Q13561	Q13561	4	4	4	Dynactin subunit 2	DCTN2	1	16	16	16	44.23	401	401	0	30.117	By MS/MS	By matching	By matching		By matching		31563000	27782000	14175000	0	8868000	0
Q13595	Q13595	2	2	2	Transformer-2 protein homolog alpha	TRA2A	1	8.2	8.2	8.2	32.688	282	282	0.0073193	11.079	By MS/MS	By matching	By matching				4140900	2830600	2096100	0	0	0
Q13601	Q13601	4	4	4	KRR1 small subunit processome component homolog	KRR1	1	11.8	11.8	11.8	43.664	381	381	0	33.848	By MS/MS	By MS/MS	By MS/MS		By matching		33888000	27351000	11916000	0	6002100	0
Q13610	Q13610	7	7	7	Periodic tryptophan protein 1 homolog	PWP1	1	19	19	19	55.827	501	501	0	57.843	By MS/MS	By MS/MS	By matching	By matching		By matching	45319000	39514000	12974000	5287900	0	4319000
Q13813	Q13813	140	140	140	Spectrin alpha chain, non-erythrocytic 1	SPTAN1	1	62.1	62.1	62.1	284.54	2472	2472	0	323.31	By MS/MS	By MS/MS	By MS/MS	By MS/MS	By MS/MS	By matching	3520300000	2416700000	1611300000	312700000	654620000	18071000
Q13823	Q13823	9	9	9	Nucleolar GTP-binding protein 2	GNL2	1	15.5	15.5	15.5	83.654	731	731	0	62.765	By MS/MS	By MS/MS	By MS/MS				45915000	65031000	21633000	0	0	0
Q13835	Q13835	14	14	14	Plakophilin-1	PKP1	1	24	24	24	82.86	747	747	0	234.96	By MS/MS	By MS/MS	By MS/MS	By MS/MS	By MS/MS	By matching	68854000	32980000	21964000	6341300	40166000	19266000
Q13867	Q13867	3	3	3	Bleomycin hydrolase	BLMH	1	8.4	8.4	8.4	52.562	455	455	0	17.932	By MS/MS	By matching	By matching	By matching	By matching	By matching	60011000	7415800	4498000	24976000	31494000	1671100
Q13868	Q13868	6	6	6	Exosome complex component RRP4	EXOSC2	1	29	29	29	32.789	293	293	0	45.313	By MS/MS	By MS/MS	By MS/MS		By matching		81770000	76172000	31112000	0	3704900	0
Q9BVA1;Q13885	Q9BVA1;Q13885	22;22	2;2	2;2	Tubulin beta-2B chain;Tubulin beta-2A chain	TUBB2B;TUBB2A	2	51.2	5.4	5.4	49.953	445	445;445	0.00096712	12.075	By matching	By matching	By matching	By matching	By MS/MS	By matching	0	0	0	3760500	20866000	0
Q13895	Q13895	12	12	12	Bystin	BYSL	1	31.4	31.4	31.4	49.601	437	437	0	90.159	By MS/MS	By MS/MS	By MS/MS		By MS/MS		127610000	113220000	45876000	0	18086000	0
Q14011	Q14011	3	3	3	Cold-inducible RNA-binding protein	CIRBP	1	20.9	20.9	20.9	18.648	172	172	0	19.584	By MS/MS	By MS/MS	By matching				13242000	11754000	6989700	0	0	0
Q14019	Q14019	4	4	4	Coactosin-like protein	COTL1	1	26.1	26.1	26.1	15.945	142	142	0	26.644				By matching			0	0	0	3699200	0	0
Q14103	Q14103	19	19	18	Heterogeneous nuclear ribonucleoprotein D0	HNRNPD	1	45.1	45.1	42.8	38.434	355	355	0	261.96	By MS/MS	By MS/MS	By MS/MS	By MS/MS	By MS/MS	By MS/MS	1542400000	1205600000	520000000	77020000	296310000	32137000
Q14123	Q14123	2	2	2	Calcium/calmodulin-dependent 3,5-cyclic nucleotide phosphodiesterase 1C	PDE1C	1	4.1	4.1	4.1	80.759	709	709	0	12.77							0	0	0	0	0	0
Q14152	Q14152	22	22	22	Eukaryotic translation initiation factor 3 subunit A	EIF3A	1	18.5	18.5	18.5	166.57	1382	1382	0	149.45	By MS/MS	By MS/MS	By MS/MS	By matching	By MS/MS	By matching	138070000	122730000	89737000	7830900	43835000	884180
Q14203	Q14203	2	2	2	Dynactin subunit 1	DCTN1	1	1.7	1.7	1.7	141.69	1278	1278	0	13.193	By MS/MS	By MS/MS	By matching		By MS/MS		5362500	3240000	1665100	0	3606200	0
Q14204	Q14204	2	2	2	Cytoplasmic dynein 1 heavy chain 1	DYNC1H1	1	0.4	0.4	0.4	532.4	4646	4646	0.0064338	11.145			By matching	By matching	By matching		0	0	1376500	6635700	7356300	0
Q14241	Q14241	4	4	4	Transcription elongation factor B polypeptide 3	TCEB3	1	6.9	6.9	6.9	89.908	798	798	0	40.078	By MS/MS	By MS/MS	By MS/MS			By matching	45948000	45542000	16051000	0	0	1753900
Q14257	Q14257	5	5	5	Reticulocalbin-2	RCN2	1	17.7	17.7	17.7	36.876	317	317	0	111.35		By matching	By matching	By MS/MS	By MS/MS	By matching	0	7799800	3054700	36117000	20719000	3798700
Q14258	Q14258	8	8	8	E3 ubiquitin/ISG15 ligase TRIM25	TRIM25	1	15.4	15.4	15.4	70.973	630	630	0	61.211	By MS/MS	By MS/MS	By MS/MS				55281000	35169000	12457000	0	0	0
Q14331	Q14331	2	2	2	Protein FRG1	FRG1	1	11.2	11.2	11.2	29.172	258	258	0	12.316		By MS/MS	By MS/MS	By matching	By matching	By matching	0	13430000	15491000	32126000	55293000	24637000
Q14444	Q14444	11	11	11	Caprin-1	CAPRIN1	1	21.6	21.6	21.6	78.365	709	709	0	185.25	By MS/MS	By MS/MS	By MS/MS	By matching	By matching	By matching	275290000	256410000	95843000	9241500	44469000	2317400
Q14498	Q14498	6	6	6	RNA-binding protein 39	RBM39	1	15.8	15.8	15.8	59.379	530	530	0	136.08	By MS/MS	By MS/MS	By MS/MS	By MS/MS	By matching	By matching	87463000	61147000	21207000	4302200	24634000	6350500
Q14525;Q92764;O76014;O76015	Q14525	18;4;2;2	16;3;1;1	3;0;0;0	Keratin, type I cuticular Ha3-II	KRT33B	4	43.1	39.6	6.2	46.213	404	404;455;449;456	0	209.33	By matching	By matching	By matching	By matching	By matching	By matching	5386600	7051100	0	3417400	28136000	9179800
Q14566	Q14566	8	8	8	DNA replication licensing factor MCM6	MCM6	1	11.7	11.7	11.7	92.888	821	821	0	59.867	By matching	By matching		By MS/MS	By MS/MS	By matching	4114300	9408000	0	29312000	63097000	6530900
Q14574	Q14574	3	3	3	Desmocollin-3	DSC3	1	5.2	5.2	5.2	99.968	896	896	0	17.161	By MS/MS	By matching	By matching	By matching	By matching		22063000	3606500	3080200	6805200	11636000	0
Q14627	Q14627	3	3	3	Interleukin-13 receptor subunit alpha-2	IL13RA2	1	7.9	7.9	7.9	44.176	380	380	0	16.458				By matching	By matching	By matching	0	0	0	6582900	3188500	3226200
Q14669	Q14669	4	4	4	E3 ubiquitin-protein ligase TRIP12	TRIP12	1	3	3	3	220.43	1992	1992	0	27.602	By MS/MS	By MS/MS	By matching				13834000	621180	867720	0	0	0
Q14684	Q14684	7	7	7	Ribosomal RNA processing protein 1 homolog B	RRP1B	1	14.4	14.4	14.4	84.427	758	758	0	42.439	By MS/MS	By MS/MS	By matching				37363000	17048000	7036400	0	0	0
Q14690	Q14690	5	5	5	Protein RRP5 homolog	PDCD11	1	3.6	3.6	3.6	208.7	1871	1871	0	29.726	By MS/MS	By MS/MS	By matching				14895000	13104000	8253600	0	0	0
Q14692	Q14692	18	18	18	Ribosome biogenesis protein BMS1 homolog	BMS1	1	17.1	17.1	17.1	145.81	1282	1282	0	163.72	By MS/MS	By MS/MS	By MS/MS		By matching	By matching	226870000	147550000	60480000	0	16600000	2560100
Q14694	Q14694	5	5	5	Ubiquitin carboxyl-terminal hydrolase 10	USP10	1	8.3	8.3	8.3	87.133	798	798	0	32.516	By MS/MS	By MS/MS	By matching		By matching		31525000	34161000	14456000	0	4229000	0
Q14697	Q14697	5	5	5	Neutral alpha-glucosidase AB	GANAB	1	7	7	7	106.87	944	944	0	31.14	By matching	By matching	By matching	By MS/MS	By MS/MS	By matching	4034400	5240500	6153900	43817000	52976000	9616700
Q14839;Q8TDI0	Q14839;Q8TDI0	3;3	3;3	2;2	Chromodomain-helicase-DNA-binding protein 4;Chromodomain-helicase-DNA-binding protein 5	CHD4;CHD5	2	1.9	1.9	1.5	218	1912	1912;1954	0	18.909		By matching	By matching				0	9383200	5684400	0	0	0
Q14847	Q14847	3	3	3	LIM and SH3 domain protein 1	LASP1	1	14.2	14.2	14.2	29.717	261	261	0	26.272	By matching						4300400	0	0	0	0	0
Q14974	Q14974	5	5	5	Importin subunit beta-1	KPNB1	1	5.8	5.8	5.8	97.169	876	876	0	77.724	By MS/MS	By MS/MS	By MS/MS	By MS/MS	By MS/MS	By matching	12463000	13423000	8113000	27955000	11897000	4795300
Q14CN4	Q14CN4	9	1	1	Keratin, type II cytoskeletal 72	KRT72	1	13.1	2.2	2.2	55.877	511	511	1	-2	By matching	By MS/MS	By matching	By matching	By matching	By matching	0	10343000	0	2610000	5473000	0
Q15007	Q15007	1	1	1	Pre-mRNA-splicing regulator WTAP	WTAP	1	3.8	3.8	3.8	44.243	396	396	0	25.422	By MS/MS	By MS/MS	By MS/MS				0	4007100	1228100	0	0	0
Q15008	Q15008	2	2	2	26S proteasome non-ATPase regulatory subunit 6	PSMD6	1	8.2	8.2	8.2	45.531	389	389	0.0047438	11.733		By matching		By matching	By matching		0	724540	0	897530	3799200	0
Q15020	Q15020	12	12	12	Squamous cell carcinoma antigen recognized by T-cells 3	SART3	1	17.5	17.5	17.5	109.93	963	963	0	161.98	By MS/MS	By MS/MS	By MS/MS	By matching	By MS/MS	By matching	114840000	80211000	32508000	1925700	12561000	5205100
Q15024	Q15024	6	6	6	Exosome complex component RRP42	EXOSC7	1	28.9	28.9	28.9	31.821	291	291	0	51.442	By MS/MS	By MS/MS	By MS/MS	By matching	By matching	By matching	57202000	53856000	22578000	13131000	14015000	4159900
Q15029	Q15029	23	22	22	116 kDa U5 small nuclear ribonucleoprotein component	EFTUD2	1	31.2	30.1	30.1	109.43	972	972	0	176.59	By MS/MS	By MS/MS	By MS/MS	By matching	By MS/MS	By matching	201420000	150010000	67175000	42565000	97312000	1209700
Q15042	Q15042	2	2	2	Rab3 GTPase-activating protein catalytic subunit	RAB3GAP1	1	3.2	3.2	3.2	110.52	981	981	0.0055918	11.428	By matching	By MS/MS					2754800	2176400	0	0	0	0
Q15050	Q15050	2	2	2	Ribosome biogenesis regulatory protein homolog	RRS1	1	6.8	6.8	6.8	41.193	365	365	0	12.557	By MS/MS	By matching	By matching				9776000	4190300	4014700	0	0	0
Q15057	Q15057	4	4	4	Arf-GAP with coiled-coil, ANK repeat and PH domain-containing protein 2	ACAP2	1	7.5	7.5	7.5	88.028	778	778	0	31.875	By matching	By matching	By MS/MS				14832000	22885000	8947800	0	0	0
Q15084	Q15084	8	8	8	Protein disulfide-isomerase A6	PDIA6	1	27.7	27.7	27.7	48.121	440	440	0	49.388	By MS/MS	By MS/MS	By MS/MS	By MS/MS	By MS/MS	By MS/MS	17004000	13930000	6033300	152440000	385660000	36394000
Q15124	Q15124	1	1	1	Phosphoglucomutase-like protein 5	PGM5	1	1.6	1.6	1.6	62.224	567	567	0.008643	7.6827	By MS/MS	By MS/MS	By MS/MS	By MS/MS	By MS/MS	By MS/MS	102340000	117360000	52339000	24040000	109780000	6360800
Q15149	Q15149	123	123	118	Plectin	PLEC	1	33.8	33.8	32	531.78	4684	4684	0	323.31	By MS/MS	By MS/MS	By MS/MS	By MS/MS	By MS/MS	By MS/MS	1417200000	1066700000	539770000	904940000	1427500000	179980000
Q15208;Q9Y2H1	Q15208	10;1	10;1	10;1	Serine/threonine-protein kinase 38	STK38	2	30.8	30.8	30.8	54.19	465	465;464	0	105.97	By MS/MS	By MS/MS	By MS/MS	By matching	By MS/MS	By matching	124020000	93945000	59607000	64141000	79816000	3173700
Q15233	Q15233	4	2	2	Non-POU domain-containing octamer-binding protein	NONO	1	7.4	5.3	5.3	54.231	471	471	0	12.334	By matching	By MS/MS					0	0	0	0	0	0
Q15269	Q15269	1	1	1	Periodic tryptophan protein 2 homolog	PWP2	1	1.7	1.7	1.7	102.45	919	919	0.0090416	10.67		By MS/MS					0	2867500	0	0	0	0
Q15323;Q14532	Q15323	18;5	7;1	3;0	Keratin, type I cuticular Ha1	KRT31	2	41.8	16.3	8.2	47.237	416	416;448	0	66.626	By matching	By matching	By matching	By matching	By matching	By matching	0	0	0	4135100	12268000	0
Q15365	Q15365	6	6	4	Poly(rC)-binding protein 1	PCBP1	1	23.9	23.9	15.2	37.497	356	356	0	132.36	By MS/MS	By MS/MS	By MS/MS	By MS/MS	By MS/MS	By MS/MS	42720000	53082000	24270000	75625000	243040000	107490000
Q15366;P57721	Q15366;P57721	6;3	4;1	4;1	Poly(rC)-binding protein 2;Poly(rC)-binding protein 3	PCBP2;PCBP3	2	26.6	18.1	18.1	38.58	365	365;371	0	29.083	By MS/MS	By MS/MS	By MS/MS	By MS/MS	By matching	By MS/MS	44748000	27717000	10784000	23386000	76353000	22131000
Q15369	Q15369	4	4	4	Transcription elongation factor B polypeptide 1	TCEB1	1	33	33	33	12.473	112	112	0	26.42		By MS/MS					0	0	0	0	0	0
Q15370	Q15370	3	3	3	Transcription elongation factor B polypeptide 2	TCEB2	1	25.4	25.4	25.4	13.133	118	118	0	16.886	By matching	By matching					12419000	6941100	0	0	0	0
Q15393	Q15393	25	25	25	Splicing factor 3B subunit 3	SF3B3	1	25.9	25.9	25.9	135.58	1217	1217	0	247.93	By MS/MS	By MS/MS	By MS/MS	By MS/MS	By MS/MS	By matching	522040000	391730000	201990000	53712000	137230000	14235000
Q15397	Q15397	12	12	12	Pumilio domain-containing protein KIAA0020	KIAA0020	1	23	23	23	73.584	648	648	0	101.51	By MS/MS	By MS/MS	By MS/MS		By matching		110300000	85684000	25397000	0	7085700	0
Q15427	Q15427	4	4	4	Splicing factor 3B subunit 4	SF3B4	1	16.3	16.3	16.3	44.385	424	424	0	27.123	By MS/MS	By MS/MS	By matching	By matching			31349000	13058000	7985600	2619200	0	0
Q15517	Q15517	5	5	5	Corneodesmosin	CDSN	1	18	18	18	51.522	529	529	0	51.207	By MS/MS	By matching	By matching	By matching	By matching		117640000	14398000	3712600	5530600	15272000	0
Q15646	Q15646	7	7	7	2-5-oligoadenylate synthase-like protein	OASL	1	19.1	19.1	19.1	59.225	514	514	0	49.846	By MS/MS	By MS/MS	By MS/MS				63191000	46553000	37523000	0	0	0
Q15650	Q15650	1	1	1	Activating signal cointegrator 1	TRIP4	1	3.4	3.4	3.4	66.145	581	581	0.0083612	7.1067							0	0	0	0	0	0
Q15717	Q15717	7	7	7	ELAV-like protein 1	ELAVL1	1	23	23	23	36.091	326	326	0	75.591	By MS/MS	By MS/MS	By MS/MS	By matching	By matching		132860000	128480000	48447000	4425400	20450000	0
Q15758	Q15758	1	1	1	Neutral amino acid transporter B(0)	SLC1A5	1	3.7	3.7	3.7	56.598	541	541	0.0084746	7.2581				By matching	By MS/MS	By matching	0	0	0	4512100	7368000	2049500
Q16186	Q16186	1	1	1	Proteasomal ubiquitin receptor ADRM1	ADRM1	1	3.9	3.9	3.9	42.153	407	407	0.0089767	10.174				By MS/MS	By MS/MS	By matching	0	0	0	10272000	5445300	7066400
Q16531	Q16531	25	25	25	DNA damage-binding protein 1	DDB1	1	32.2	32.2	32.2	126.97	1140	1140	0	318.21	By MS/MS	By MS/MS	By MS/MS	By matching	By MS/MS	By matching	281520000	261930000	129320000	50818000	152450000	14034000
Q16540	Q16540	2	2	2	39S ribosomal protein L23, mitochondrial	MRPL23	1	24.2	24.2	24.2	17.781	153	153	0	13.938	By matching	By MS/MS	By MS/MS		By matching		4692200	3814100	4440700	0	1506100	0
Q16555	Q16555	2	2	2	Dihydropyrimidinase-related protein 2	DPYSL2	1	5.9	5.9	5.9	62.293	572	572	0.0047304	11.695							0	0	0	0	0	0
Q16576	Q16576	5	5	3	Histone-binding protein RBBP7	RBBP7	1	13.4	13.4	9.4	47.82	425	425	0	43.128	By MS/MS	By MS/MS	By matching	By matching	By matching		37084000	44730000	24374000	9311700	3564000	0
Q16610	Q16610	2	2	2	Extracellular matrix protein 1	ECM1	1	5	5	5	60.673	540	540	0	12.617	By matching		By matching				5329000	0	2290400	0	0	0
Q16629	Q16629	9	9	8	Serine/arginine-rich splicing factor 7	SRSF7	1	33.6	33.6	33.6	27.366	238	238	0	173.41	By MS/MS	By MS/MS	By MS/MS	By MS/MS	By MS/MS	By matching	338240000	253560000	136430000	9473900	45577000	4634300
Q16666;Q6K0P9	Q16666	23;2	23;2	23;2	Gamma-interferon-inducible protein 16	IFI16	2	30.6	30.6	30.6	88.255	785	785;492	0	269.37	By MS/MS	By MS/MS	By MS/MS	By MS/MS	By MS/MS	By matching	638010000	531420000	157180000	10933000	81351000	5087000
Q16777;Q6FI13;Q99878;Q96KK5;Q9BTM1;P20671;P0C0S8	Q16777;Q6FI13;Q99878;Q96KK5;Q9BTM1;P20671;P0C0S8	8;8;7;7;7;7;7	8;8;7;7;7;7;7	3;3;2;2;2;2;2	Histone H2A type 2-C;Histone H2A type 2-A;Histone H2A type 1-J;Histone H2A type 1-H;Histone H2A.J;Histone H2A type 1-D;Histone H2A type 1	HIST2H2AC;HIST2H2AA3;HIST1H2AJ;HIST1H2AH;H2AFJ;HIST1H2AD;HIST1H2AG	7	58.1	58.1	36.4	13.988	129	129;130;128;128;129;130;130	0	129.01	By MS/MS	By MS/MS	By MS/MS	By MS/MS	By MS/MS	By MS/MS	3414000000	2620400000	1229100000	185580000	1034100000	102880000
Q16891	Q16891	5	5	5	MICOS complex subunit MIC60	IMMT	1	8.7	8.7	8.7	83.677	758	758	0	31.611		By matching		By MS/MS	By MS/MS	By matching	0	8807400	0	33139000	54954000	8093800
Q1ED39	Q1ED39	3	3	3	Lysine-rich nucleolar protein 1	KNOP1	1	10.3	10.3	10.3	51.588	458	458	0	18.807	By MS/MS	By MS/MS	By MS/MS		By matching		10996000	4458800	1331200	0	4126900	0
Q1KMD3	Q1KMD3	4	4	4	Heterogeneous nuclear ribonucleoprotein U-like protein 2	HNRNPUL2	1	6.8	6.8	6.8	85.104	747	747	0	40.816	By MS/MS			By matching	By matching	By matching	0	0	0	10213000	21696000	5753900
Q2NL82	Q2NL82	13	13	13	Pre-rRNA-processing protein TSR1 homolog	TSR1	1	21.9	21.9	21.9	91.809	804	804	0	80.358	By MS/MS	By MS/MS	By matching	By matching	By matching	By matching	82012000	66850000	20695000	6725800	37232000	6788200
Q3KQU3	Q3KQU3	6	6	6	MAP7 domain-containing protein 1	MAP7D1	1	8	8	8	92.819	841	841	0	62.952	By matching	By matching	By MS/MS	By matching	By matching		31937000	19268000	10827000	2965300	5593300	0
Q3SY84	Q3SY84	10	2	2	Keratin, type II cytoskeletal 71	KRT71	1	15.9	4.6	4.6	57.291	523	523	0	13.625	By matching	By MS/MS	By MS/MS	By matching	By matching	By matching	0	68763000	4925300	2348400	11119000	0
Q3ZCM7	Q3ZCM7	11	2	2	Tubulin beta-8 chain	TUBB8	1	24.5	7.4	7.4	49.775	444	444	0	154.54	By MS/MS	By MS/MS	By matching	By matching	By MS/MS	By MS/MS	25705000	7526100	2546900	0	219810000	45287000
Q3ZCQ8	Q3ZCQ8	2	2	2	Mitochondrial import inner membrane translocase subunit TIM50	TIMM50	1	7.6	7.6	7.6	39.646	353	353	0	49.032				By MS/MS	By MS/MS	By MS/MS	0	0	0	23882000	7515200	20701000
Q49A26	Q49A26	8	8	8	Putative oxidoreductase GLYR1	GLYR1	1	19	19	19	60.556	553	553	0	62.226	By MS/MS	By MS/MS	By MS/MS		By matching	By matching	81412000	47727000	13550000	0	10298000	89696000
Q4KMG0	Q4KMG0	2	2	2	Cell adhesion molecule-related/down-regulated by oncogenes	CDON	1	2.4	2.4	2.4	139.15	1287	1287	0.0072793	10.877		By MS/MS					0	157970000	0	0	0	0
Q52LJ0	Q52LJ0	2	2	2	Protein FAM98B	FAM98B	1	7.6	7.6	7.6	37.19	330	330	0	13.744	By matching						5238300	0	0	0	0	0
Q53GS9	Q53GS9	1	1	1	U4/U6.U5 tri-snRNP-associated protein 2	USP39	1	2.7	2.7	2.7	65.38	565	565	0.0088496	9.1066							0	0	0	0	0	0
Q58FF8	Q58FF8	9	2	2	Putative heat shock protein HSP 90-beta 2	HSP90AB2P	1	17.8	4.5	4.5	44.348	381	381	0	21.531	By matching	By matching	By matching	By MS/MS	By MS/MS	By matching	0	0	0	20340000	28059000	7267200
Q5D862	Q5D862	21	21	21	Filaggrin-2	FLG2	1	21.7	21.7	21.7	248.07	2391	2391	0	323.31	By MS/MS	By MS/MS	By MS/MS	By MS/MS	By MS/MS	By MS/MS	568780000	114730000	46188000	221110000	228320000	60979000
Q8NHU0;Q5HYN5;P0DMV0;P0DMU8;P0DMU7	Q8NHU0;Q5HYN5;P0DMV0;P0DMU8;P0DMU7	6;6;5;5;5	6;6;5;5;5	1;1;1;1;1	Cancer/testis antigen family 45 member A3;Cancer/testis antigen family 45 member A1;Cancer/testis antigen family 45 member A7;Cancer/testis antigen family 45 member A5;Cancer/testis antigen family 45 member A6	CT45A3;CT45A1;CT45A7;CT45A5;CT45A6	5	43.9	43.9	4.2	21.33	189	189;189;189;189;189	0	53.414	By MS/MS	By MS/MS	By MS/MS	By MS/MS	By MS/MS		180810000	145830000	55175000	2449800	38626000	0
Q5JTH9	Q5JTH9	29	29	29	RRP12-like protein	RRP12	1	32.6	32.6	32.6	143.7	1297	1297	0	323.31	By MS/MS	By MS/MS	By MS/MS	By matching	By MS/MS	By matching	345110000	334000000	117860000	6097400	38432000	1409400
Q5RKV6	Q5RKV6	4	4	4	Exosome complex component MTR3	EXOSC6	1	25	25	25	28.235	272	272	0	78.696	By MS/MS	By MS/MS	By MS/MS		By MS/MS		198190000	71910000	32472000	0	7278700	0
Q5SSJ5	Q5SSJ5	9	9	9	Heterochromatin protein 1-binding protein 3	HP1BP3	1	17.2	17.2	17.2	61.206	553	553	0	68.953	By MS/MS	By MS/MS	By MS/MS	By matching	By matching		125490000	61644000	32858000	1978600	9263600	0
Q5SW79;Q96L14	Q5SW79	13;2	13;2	13;2	Centrosomal protein of 170 kDa	CEP170	2	11.7	11.7	11.7	175.29	1584	1584;293	0	97.573	By MS/MS	By MS/MS	By MS/MS	By matching	By MS/MS		69869000	83194000	29264000	24491000	13387000	0
Q5T200	Q5T200	1	1	1	Zinc finger CCCH domain-containing protein 13	ZC3H13	1	0.8	0.8	0.8	196.63	1668	1668	0.0098928	6.9656	By MS/MS	By MS/MS	By MS/MS				0	3411000	0	0	0	0
Q5T280	Q5T280	3	3	3	Putative methyltransferase C9orf114	C9orf114	1	10.1	10.1	10.1	42.008	376	376	0	20.832	By MS/MS	By MS/MS	By matching				37427000	33409000	14806000	0	0	0
Q5T3I0	Q5T3I0	6	6	6	G patch domain-containing protein 4	GPATCH4	1	22.6	22.6	22.6	50.381	446	446	0	94.372	By MS/MS	By MS/MS	By MS/MS		By matching		74563000	46790000	25110000	0	7570900	0
Q5T749	Q5T749	12	12	12	Keratinocyte proline-rich protein	KPRP	1	31.6	31.6	31.6	64.135	579	579	0	158.87	By MS/MS	By MS/MS	By MS/MS	By matching	By MS/MS	By MS/MS	369770000	69121000	49375000	9685400	100550000	12336000
Q5T750	Q5T750	2	2	2	Skin-specific protein 32	XP32	1	3.6	3.6	3.6	26.238	250	250	0	12.661	By MS/MS	By MS/MS	By MS/MS	By matching	By MS/MS	By matching	93733000	36343000	15301000	29674000	39986000	18846000
Q5TAA0	Q5TAA0	1	1	1	Tetratricopeptide repeat protein 22	TTC22	1	2.5	2.5	2.5	63.361	569	569	1	-2			By MS/MS				0	0	0	0	0	0
Q5TZA2	Q5TZA2	2	2	2	Rootletin	CROCC	1	1.3	1.3	1.3	228.52	2017	2017	0	12.36	By matching	By MS/MS					1852000	2240200	0	0	0	0
Q5VU43	Q5VU43	3	3	3	Myomegalin	PDE4DIP	1	1.6	1.6	1.6	265.08	2346	2346	0	19.248							0	0	0	0	0	0
Q5VYS8	Q5VYS8	2	2	2	Terminal uridylyltransferase 7	ZCCHC6	1	2.2	2.2	2.2	171.23	1495	1495	0.007326	11.086					By matching		0	0	0	0	32278000	0
Q69YN4	Q69YN4	1	1	1	Protein virilizer homolog	KIAA1429	1	1	1	1	202.02	1812	1812	0.0083403	7.0815	By matching	By MS/MS		By matching			13716000	11378000	0	3898800	0	0
Q6DD87	Q6DD87	2	2	2	Zinc finger protein 787	ZNF787	1	6.8	6.8	6.8	40.543	383	383	0.005571	11.372	By matching	By MS/MS	By MS/MS				18688000	5034700	6962500	0	0	0
Q6DKI1	Q6DKI1	2	2	2	60S ribosomal protein L7-like 1	RPL7L1	1	9.8	9.8	9.8	28.661	246	246	0.0028846	11.99	By MS/MS	By matching					6502900	1740100	0	0	0	0
Q6E0U4	Q6E0U4	1	1	1	Dermokine	DMKN	1	3.6	3.6	3.6	47.082	476	476	0	14.787	By matching		By matching				9233200	0	1402100	0	0	0
Q6IBS0	Q6IBS0	2	2	2	Twinfilin-2	TWF2	1	10.6	10.6	10.6	39.548	349	349	0	12.711				By MS/MS	By matching	By MS/MS	0	0	0	11173000	8911600	3330400
Q6IN85	Q6IN85	3	3	3	Serine/threonine-protein phosphatase 4 regulatory subunit 3A	SMEK1	1	3	3	3	95.367	833	833	0	18.036	By MS/MS	By matching			By matching		4079400	2431900	0	0	880090	0
Q6KB66	Q6KB66	20	20	20	Keratin, type II cytoskeletal 80	KRT80	1	45.4	45.4	45.4	50.525	452	452	0	152.63	By MS/MS	By MS/MS	By MS/MS	By MS/MS	By MS/MS	By matching	175550000	108970000	29393000	67752000	126220000	22587000
Q6NZI2	Q6NZI2	13	13	13	Polymerase I and transcript release factor	PTRF	1	31.3	31.3	31.3	43.476	390	390	0	323.31	By MS/MS	By MS/MS	By MS/MS	By matching	By MS/MS	By matching	492520000	402650000	204470000	12746000	169690000	878310
Q6P158	Q6P158	7	6	6	Putative ATP-dependent RNA helicase DHX57	DHX57	1	5.9	5.3	5.3	155.6	1386	1386	0	38.55	By MS/MS	By MS/MS	By matching				18342000	19621000	5787700	0	0	0
Q6P2Q9	Q6P2Q9	33	33	33	Pre-mRNA-processing-splicing factor 8	PRPF8	1	16.3	16.3	16.3	273.6	2335	2335	0	289.17	By MS/MS	By MS/MS	By MS/MS	By MS/MS	By MS/MS	By MS/MS	191390000	132130000	82136000	18625000	51690000	4632800
Q6P3W7	Q6P3W7	11	11	11	SCY1-like protein 2	SCYL2	1	16.1	16.1	16.1	103.71	929	929	0	103.2	By MS/MS	By MS/MS	By MS/MS	By MS/MS	By MS/MS	By matching	136800000	110550000	34728000	44631000	105920000	17342000
Q6P587	Q6P587	1	1	1	Acylpyruvase FAHD1, mitochondrial	FAHD1	1	7.1	7.1	7.1	24.843	224	224	0.008547	7.4739				By MS/MS			0	0	0	0	0	0
Q6P5R6	Q6P5R6	3	3	3	60S ribosomal protein L22-like 1	RPL22L1	1	39.3	39.3	39.3	14.606	122	122	0	27.648	By MS/MS	By matching	By matching	By matching	By matching		74694000	59848000	14685000	6765500	13292000	0
Q6PK04	Q6PK04	2	2	2	Coiled-coil domain-containing protein 137	CCDC137	1	7.3	7.3	7.3	33.231	289	289	0	14.071	By MS/MS	By MS/MS	By MS/MS				30458000	19029000	9406500	0	0	0
Q6PKG0;Q659C4	Q6PKG0	19;2	19;2	19;2	La-related protein 1	LARP1	2	29.7	29.7	29.7	123.51	1096	1096;914	0	171.61	By MS/MS	By MS/MS	By MS/MS	By matching	By matching	By matching	184560000	162680000	82300000	13624000	31630000	5762800
Q6UN15	Q6UN15	3	3	3	Pre-mRNA 3-end-processing factor FIP1	FIP1L1	1	8.2	8.2	8.2	66.526	594	594	0	51.014		By MS/MS	By MS/MS		By matching		0	9961400	6849500	0	5050200	0
Q6UVK1	Q6UVK1	11	11	11	Chondroitin sulfate proteoglycan 4	CSPG4	1	8.1	8.1	8.1	250.53	2322	2322	0	78.135	By matching	By MS/MS	By MS/MS	By MS/MS	By matching	By matching	20949000	18589000	14289000	90400000	48118000	1255300
Q6UWP8	Q6UWP8	7	7	7	Suprabasin	SBSN	1	26.8	26.8	26.8	60.54	590	590	0	74.085	By matching	By matching	By matching	By MS/MS	By MS/MS		18559000	6931900	3964400	3542700	11594000	0
Q6UXN9	Q6UXN9	3	3	3	WD repeat-containing protein 82	WDR82	1	15	15	15	35.079	313	313	0	34.835	By MS/MS	By MS/MS	By matching				6437100	24189000	3214200	0	0	0
Q6ZVX7	Q6ZVX7	6	6	6	F-box only protein 50	NCCRP1	1	29.1	29.1	29.1	30.847	275	275	0	74.283	By MS/MS	By MS/MS	By MS/MS	By MS/MS	By MS/MS	By matching	68061000	35231000	18710000	29006000	33868000	8704600
Q70UQ0	Q70UQ0	1	1	1	Inhibitor of nuclear factor kappa-B kinase-interacting protein	IKBIP	1	3.4	3.4	3.4	39.309	350	350	0.0084818	7.2636		By MS/MS					0	7387600	0	0	0	0
Q71DI3	Q71DI3	5	5	1	Histone H3.2	HIST2H3A	1	43.4	43.4	23.5	15.388	136	136	0	95.388	By MS/MS	By MS/MS	By MS/MS	By MS/MS	By MS/MS	By MS/MS	646400000	470470000	233290000	63076000	173250000	55422000
Q71RC2	Q71RC2	3	3	3	La-related protein 4	LARP4	1	5.9	5.9	5.9	80.595	724	724	0	21.373	By MS/MS	By MS/MS	By MS/MS	By matching	By matching		11337000	17161000	5624800	4326900	5317400	0
Q71UM5	Q71UM5	4	2	2	40S ribosomal protein S27-like	RPS27L	1	40.5	15.5	15.5	9.4771	84	84	0	14.9	By matching	By matching	By matching	By MS/MS	By MS/MS	By MS/MS	35687000	15090000	5046400	52532000	64385000	30789000
Q7KZF4	Q7KZF4	5	5	5	Staphylococcal nuclease domain-containing protein 1	SND1	1	6.2	6.2	6.2	102	910	910	0	31.142	By MS/MS	By matching	By matching	By matching			9379300	5957400	2470200	1347900	0	0
Q7L0Y3	Q7L0Y3	27	27	27	Mitochondrial ribonuclease P protein 1	TRMT10C	1	59.8	59.8	59.8	47.346	403	403	0	323.31	By MS/MS	By MS/MS	By MS/MS	By MS/MS	By MS/MS	By MS/MS	1334500000	1050300000	498790000	139010000	308650000	39134000
Q7L2E3	Q7L2E3	31	31	31	Putative ATP-dependent RNA helicase DHX30	DHX30	1	31.2	31.2	31.2	133.94	1194	1194	0	323.31	By MS/MS	By MS/MS	By MS/MS	By matching	By matching		294670000	264130000	81633000	1146600	31575000	0
Q7L2H7	Q7L2H7	4	4	4	Eukaryotic translation initiation factor 3 subunit M	EIF3M	1	19	19	19	42.502	374	374	0	55.808	By matching	By MS/MS	By MS/MS				10597000	27958000	7709200	0	0	0
Q7L2J0	Q7L2J0	3	3	3	7SK snRNA methylphosphate capping enzyme	MEPCE	1	7.5	7.5	7.5	74.354	689	689	0	29.628	By MS/MS	By matching	By matching				9783800	6053700	3815300	0	0	0
Q7RTV0	Q7RTV0	4	4	4	PHD finger-like domain-containing protein 5A	PHF5A	1	40.9	40.9	40.9	12.405	110	110	0	25.396	By MS/MS	By MS/MS	By MS/MS		By MS/MS		69091000	64422000	33210000	0	3188700	0
Q7Z2T5	Q7Z2T5	3	3	3	TRMT1-like protein	TRMT1L	1	7.5	7.5	7.5	81.746	733	733	0	29.938	By matching	By MS/MS	By matching				16784000	17380000	3847100	0	0	0
Q7Z2W4;Q9H0J9	Q7Z2W4	21;1	21;1	21;1	Zinc finger CCCH-type antiviral protein 1	ZC3HAV1	2	32.5	32.5	32.5	101.43	902	902;701	0	275.12	By MS/MS	By MS/MS	By MS/MS	By matching	By MS/MS		355510000	341580000	170610000	3126000	42307000	0
Q7Z3Y7	Q7Z3Y7	7	1	0	Keratin, type I cytoskeletal 28	KRT28	1	9.9	2.4	0	50.567	464	464	1	-2	By matching	By MS/MS	By matching	By matching	By matching	By matching	0	0	0	0	0	0
Q7Z3Y8;Q7Z3Z0	Q7Z3Y8;Q7Z3Z0	7;4	3;1	3;1	Keratin, type I cytoskeletal 27;Keratin, type I cytoskeletal 25	KRT27;KRT25	2	12.6	7.2	7.2	49.822	459	459;450	0	20.329	By matching	By MS/MS	By MS/MS	By matching	By MS/MS	By matching	0	44706000	12555000	0	14627000	0
Q7Z417	Q7Z417	2	2	2	Nuclear fragile X mental retardation-interacting protein 2	NUFIP2	1	4.2	4.2	4.2	76.12	695	695	0.0064576	11.195	By MS/MS	By MS/MS	By matching				13993000	15598000	554350	0	0	0
Q7Z6Z7	Q7Z6Z7	4	4	4	E3 ubiquitin-protein ligase HUWE1	HUWE1	1	1.7	1.7	1.7	481.89	4374	4374	0	35.068	By matching			By MS/MS	By MS/MS	By MS/MS	1755900	0	0	20383000	8963200	14899000
Q7Z794	Q7Z794	18	12	12	Keratin, type II cytoskeletal 1b	KRT77	1	26.3	22.7	22.7	61.901	578	578	0	133.59	By MS/MS	By MS/MS	By MS/MS	By MS/MS	By MS/MS	By MS/MS	109420000	139100000	81177000	168900000	151040000	52011000
Q7Z7H8	Q7Z7H8	1	1	1	39S ribosomal protein L10, mitochondrial	MRPL10	1	7.3	7.3	7.3	29.282	261	261	0.0055814	11.416		By matching					0	1354400	0	0	0	0
Q7Z7M9	Q7Z7M9	1	1	1	Polypeptide N-acetylgalactosaminyltransferase 5	GALNT5	1	1.4	1.4	1.4	106.26	940	940	0.0087108	8.11							0	0	0	0	0	0
Q86SG5	Q86SG5	6	1	1	Protein S100-A7A	S100A7A	1	54.5	10.9	10.9	11.305	101	101	0.0091211	7.0197	By matching	By matching	By matching	By matching	By matching	By matching	0	0	0	0	0	0
Q86UE4	Q86UE4	7	7	7	Protein LYRIC	MTDH	1	16.3	16.3	16.3	63.836	582	582	0	80.123	By MS/MS	By MS/MS	By MS/MS	By matching	By matching	By MS/MS	90553000	54850000	20300000	3569800	6596300	1522900
Q86V48	Q86V48	2	2	2	Leucine zipper protein 1	LUZP1	1	1.9	1.9	1.9	120.27	1076	1076	0.0073394	11.125	By matching						1792000	0	0	0	0	0
Q86V81	Q86V81	9	9	9	THO complex subunit 4	ALYREF	1	40.1	40.1	40.1	26.888	257	257	0	213.24	By MS/MS	By MS/MS	By MS/MS	By matching	By matching	By matching	762650000	582280000	246580000	41405000	129820000	4851500
Q86VP6	Q86VP6	2	2	2	Cullin-associated NEDD8-dissociated protein 1	CAND1	1	2.2	2.2	2.2	136.37	1230	1230	0	12.738				By MS/MS	By matching		0	0	0	7066300	5112400	0
Q86WX3	Q86WX3	2	2	2	Active regulator of SIRT1	RPS19BP1	1	25	25	25	15.434	136	136	0	15.809	By MS/MS	By MS/MS	By MS/MS				21626000	14700000	5860600	0	0	0
Q86XZ4	Q86XZ4	2	2	2	Spermatogenesis-associated serine-rich protein 2	SPATS2	1	5.5	5.5	5.5	59.544	545	545	0	16.18	By MS/MS	By MS/MS	By matching				6497400	4388300	1193300	0	0	0
Q86Y46;Q7RTS7	Q86Y46;Q7RTS7	12;8	3;1	1;0	Keratin, type II cytoskeletal 73;Keratin, type II cytoskeletal 74	KRT73;KRT74	2	19.8	9.1	5	58.923	540	540;529	0	71.892	By MS/MS	By MS/MS	By MS/MS	By MS/MS	By MS/MS	By MS/MS	381330000	231250000	74632000	263580000	269830000	92024000
Q86YZ3	Q86YZ3	39	39	39	Hornerin	HRNR	1	37.3	37.3	37.3	282.39	2850	2850	0	323.31	By MS/MS	By MS/MS	By MS/MS	By MS/MS	By MS/MS	By MS/MS	3356500000	629060000	125790000	1716200000	1954500000	914180000
Q8IUF8	Q8IUF8	3	3	3	Bifunctional lysine-specific demethylase and histidyl-hydroxylase MINA	MINA	1	7.7	7.7	7.7	52.8	465	465	0	17.859	By MS/MS	By MS/MS	By matching	By matching			14879000	10698000	4634200	1608100	0	0
Q8IUX4;Q96AK3	Q8IUX4;Q96AK3	4;2	3;2	2;1	DNA dC->dU-editing enzyme APOBEC-3F;DNA dC->dU-editing enzyme APOBEC-3D	APOBEC3F;APOBEC3D	2	13.4	9.4	6.2	45.02	373	373;386	0	21.927	By MS/MS	By MS/MS	By MS/MS		By matching		28444000	18447000	7382900	0	2036600	0
Q8IVH4	Q8IVH4	1	1	1	Methylmalonic aciduria type A protein, mitochondrial	MMAA	1	3.3	3.3	3.3	46.538	418	418	1	-2		By MS/MS					0	8421400	0	0	0	0
Q8IW75	Q8IW75	3	3	3	Serpin A12	SERPINA12	1	7.5	7.5	7.5	47.174	414	414	0	17.63		By matching	By matching	By matching			0	1259900	942760	943210	0	0
Q8IWS0	Q8IWS0	6	6	6	PHD finger protein 6	PHF6	1	20.8	20.8	20.8	41.29	365	365	0	37.296	By MS/MS	By MS/MS	By MS/MS				45057000	43584000	10310000	0	0	0
Q8IWT3	Q8IWT3	2	2	2	Cullin-9	CUL9	1	0.8	0.8	0.8	281.23	2517	2517	0.0090253	10.621		By MS/MS		By matching	By matching		0	42646000	0	14000000	13909000	0
Q8IWX8	Q8IWX8	6	6	6	Calcium homeostasis endoplasmic reticulum protein	CHERP	1	8	8	8	103.7	916	916	0	42.739	By MS/MS	By MS/MS	By MS/MS		By matching		90316000	82600000	22138000	0	5575600	0
Q8IY17	Q8IY17	1	1	1	Neuropathy target esterase	PNPLA6	1	1	1	1	149.99	1366	1366	0.008489	7.2646		By matching					0	3238100	0	0	0	0
Q8IY21	Q8IY21	2	2	2	Probable ATP-dependent RNA helicase DDX60	DDX60	1	1.6	1.6	1.6	197.85	1712	1712	0.0038204	11.847	By MS/MS	By matching	By MS/MS				5440600	1969100	0	0	0	0
Q8IY37	Q8IY37	7	7	7	Probable ATP-dependent RNA helicase DHX37	DHX37	1	7.8	7.8	7.8	129.54	1157	1157	0	41.543	By matching	By MS/MS	By matching				6889100	23365000	9093900	0	0	0
Q8IY63	Q8IY63	5	5	5	Angiomotin-like protein 1	AMOTL1	1	7.1	7.1	7.1	106.57	956	956	0	41.912	By MS/MS	By MS/MS	By matching				11939000	7028800	4593100	0	0	0
Q8IY81	Q8IY81	16	16	16	pre-rRNA processing protein FTSJ3	FTSJ3	1	24.4	24.4	24.4	96.557	847	847	0	183.16	By MS/MS	By MS/MS	By MS/MS		By matching	By matching	214740000	166060000	65525000	0	12821000	4568700
Q8IYB3	Q8IYB3	2	2	2	Serine/arginine repetitive matrix protein 1	SRRM1	1	5.1	5.1	5.1	102.33	904	904	0	30.821		By MS/MS	By matching				0	6016900	1460300	0	0	0
Q8IZ69	Q8IZ69	2	2	2	tRNA (uracil-5-)-methyltransferase homolog A	TRMT2A	1	3.2	3.2	3.2	68.725	625	625	0.0073327	11.11							0	0	0	0	0	0
Q8IZP0	Q8IZP0	1	1	1	Abl interactor 1	ABI1	1	3	3	3	55.08	508	508	0.0084674	7.2547							0	0	0	0	0	0
Q8N163	Q8N163	11	11	11	Cell cycle and apoptosis regulator protein 2	CCAR2	1	19.9	19.9	19.9	102.9	923	923	0	115.55	By MS/MS	By MS/MS	By MS/MS	By matching	By MS/MS	By matching	115580000	99765000	46884000	15040000	26306000	841640
Q8N1F7	Q8N1F7	3	3	3	Nuclear pore complex protein Nup93	NUP93	1	4.3	4.3	4.3	93.487	819	819	0	19.821				By MS/MS	By MS/MS	By matching	0	0	0	7442100	10252000	904360
Q8N1G4	Q8N1G4	7	7	7	Leucine-rich repeat-containing protein 47	LRRC47	1	17.2	17.2	17.2	63.472	583	583	0	48.23	By MS/MS	By MS/MS	By MS/MS	By matching	By matching		28260000	29243000	10604000	3655100	7206700	0
Q8N1N4	Q8N1N4	30	26	26	Keratin, type II cytoskeletal 78	KRT78	1	51.2	47.3	47.3	56.865	520	520	0	229.04	By MS/MS	By MS/MS	By MS/MS	By MS/MS	By MS/MS	By matching	495050000	206790000	91895000	209310000	378500000	46225000
Q8N567	Q8N567	1	1	1	Zinc finger CCHC domain-containing protein 9	ZCCHC9	1	4.4	4.4	4.4	30.477	271	271	0.0091362	7.0494							0	0	0	0	0	0
Q8N9M5	Q8N9M5	2	2	2	Transmembrane protein 102	TMEM102	1	7.7	7.7	7.7	54.174	508	508	0	14.939	By matching		By matching				3629500	0	2659700	0	0	0
Q8N9T8	Q8N9T8	6	6	6	Protein KRI1 homolog	KRI1	1	12.9	12.9	12.9	82.597	703	703	0	48.215	By MS/MS	By MS/MS	By MS/MS		By matching		28387000	21038000	10059000	0	2267300	0
Q8NC51	Q8NC51	21	21	21	Plasminogen activator inhibitor 1 RNA-binding protein	SERBP1	1	52	52	52	44.965	408	408	0	323.31	By MS/MS	By MS/MS	By MS/MS	By MS/MS	By MS/MS	By matching	470150000	439610000	121080000	53783000	113600000	30103000
Q8NCA5	Q8NCA5	2	2	2	Protein FAM98A	FAM98A	1	4.8	4.8	4.8	55.4	519	519	0	16.704		By MS/MS					0	5335000	0	0	0	0
Q8NE71	Q8NE71	14	14	14	ATP-binding cassette sub-family F member 1	ABCF1	1	20.5	20.5	20.5	95.925	845	845	0	114.48	By MS/MS	By MS/MS	By MS/MS	By matching	By matching		103760000	104190000	37038000	4825500	11488000	0
Q8NEJ9	Q8NEJ9	2	2	2	Neuroguidin	NGDN	1	10.2	10.2	10.2	35.894	315	315	0	33.196	By MS/MS	By MS/MS	By MS/MS				9911300	11105000	1122200	0	0	0
Q8NF91	Q8NF91	2	2	2	Nesprin-1	SYNE1	1	0.3	0.3	0.3	1011.1	8797	8797	0	13.508	By MS/MS	By matching	By matching	By MS/MS	By MS/MS	By matching	138440000	123690000	43654000	14164000	39000000	4000500
Q8NFJ5	Q8NFJ5	3	3	3	Retinoic acid-induced protein 3	GPRC5A	1	12.6	12.6	12.6	40.251	357	357	0	22.556	By MS/MS	By MS/MS	By MS/MS	By matching			13235000	5311600	14147000	2404800	0	0
Q8NFW8	Q8NFW8	7	7	7	N-acylneuraminate cytidylyltransferase	CMAS	1	24.9	24.9	24.9	48.379	434	434	0	53.838	By MS/MS	By MS/MS	By matching				0	9887200	7372400	0	0	0
Q8TBN0	Q8TBN0	6	6	6	Guanine nucleotide exchange factor for Rab-3A	RAB3IL1	1	22	22	22	42.636	382	382	0	106.5	By MS/MS	By MS/MS	By MS/MS	By MS/MS	By matching	By matching	18379000	41326000	23327000	9263000	20524000	1098100
Q8TCJ2	Q8TCJ2	2	2	2	Dolichyl-diphosphooligosaccharide--protein glycosyltransferase subunit STT3B	STT3B	1	1.9	1.9	1.9	93.673	826	826	0.0064279	11.139		By matching					0	2333600	0	0	0	0
Q8TD57	Q8TD57	2	2	2	Dynein heavy chain 3, axonemal	DNAH3	1	0.6	0.6	0.6	470.77	4116	4116	0.0055659	11.363	By matching	By matching	By matching	By matching	By matching	By matching	25668000	22893000	15655000	13895000	9935400	4188500
Q8TDD1	Q8TDD1	7	7	7	ATP-dependent RNA helicase DDX54	DDX54	1	9.4	9.4	9.4	98.594	881	881	0	48.36	By MS/MS	By MS/MS	By matching				51005000	48036000	18489000	0	0	0
Q8TDN6	Q8TDN6	8	8	8	Ribosome biogenesis protein BRX1 homolog	BRIX1	1	27.8	27.8	27.8	41.401	353	353	0	68.102	By MS/MS	By MS/MS	By MS/MS		By matching	By matching	132570000	102930000	44750000	0	10459000	3102800
Q8TEQ6	Q8TEQ6	5	5	5	Gem-associated protein 5	GEMIN5	1	4.9	4.9	4.9	168.59	1508	1508	0	58.777		By MS/MS	By MS/MS				0	549990	0	0	0	0
Q8WU90	Q8WU90	3	3	3	Zinc finger CCCH domain-containing protein 15	ZC3H15	1	9.6	9.6	9.6	48.602	426	426	0	19.035	By MS/MS	By MS/MS	By matching		By matching		9350900	5009900	2189600	0	354570	0
Q8WUA4	Q8WUA4	6	6	6	General transcription factor 3C polypeptide 2	GTF3C2	1	9.9	9.9	9.9	100.68	911	911	0	35.021	By matching	By matching	By MS/MS		By matching		21912000	26049000	12695000	0	3381500	0
Q8WUM0	Q8WUM0	1	1	1	Nuclear pore complex protein Nup133	NUP133	1	1.4	1.4	1.4	128.98	1156	1156	0.0084175	7.1963		By matching					0	3000900	0	0	0	0
Q8WVM0	Q8WVM0	5	5	5	Dimethyladenosine transferase 1, mitochondrial	TFB1M	1	17.1	17.1	17.1	39.542	346	346	0	33.926	By MS/MS	By MS/MS	By MS/MS		By matching		58587000	14829000	8875800	0	1809800	0
Q8WVV4	Q8WVV4	5	5	5	Protein POF1B	POF1B	1	12.4	12.4	12.4	68.064	589	589	0	47.97	By MS/MS	By MS/MS	By MS/MS	By matching	By MS/MS	By matching	16747000	6764300	5334700	12072000	8158900	1899200
Q8WVV9	Q8WVV9	2	2	2	Heterogeneous nuclear ribonucleoprotein L-like	HNRNPLL	1	5.5	5.5	5.5	60.082	542	542	0.004717	11.604							0	0	0	0	0	0
Q8WWM7	Q8WWM7	2	2	2	Ataxin-2-like protein	ATXN2L	1	3	3	3	113.37	1075	1075	0	12.394		By matching	By matching	By matching	By MS/MS		0	17967000	4195500	5893700	6407100	0
Q8WWY3	Q8WWY3	9	9	9	U4/U6 small nuclear ribonucleoprotein Prp31	PRPF31	1	20.4	20.4	20.4	55.455	499	499	0	59.818	By MS/MS	By MS/MS	By MS/MS	By matching	By matching		93022000	87978000	33193000	2335400	10271000	0
Q8WXX5	Q8WXX5	4	4	4	DnaJ homolog subfamily C member 9	DNAJC9	1	20	20	20	29.909	260	260	0	35.512	By matching	By MS/MS	By MS/MS				19466000	17594000	6784900	0	0	0
Q8WZ42	Q8WZ42	2	2	2	Titin	TTN	1	0.1	0.1	0.1	3816	34350	34350	0.0089928	10.481	By matching	By matching	By matching	By matching	By matching	By matching	44434000	39320000	26621000	210750000	116500000	182260000
Q92499	Q92499	12	12	12	ATP-dependent RNA helicase DDX1	DDX1	1	23.5	23.5	23.5	82.431	740	740	0	114.05	By MS/MS	By MS/MS	By MS/MS		By matching	By matching	58755000	34497000	11519000	0	3652000	6635400
Q92522	Q92522	7	7	7	Histone H1x	H1FX	1	35.7	35.7	35.7	22.487	213	213	0	71.485	By MS/MS	By MS/MS	By MS/MS	By matching	By MS/MS		437100000	328710000	130640000	10364000	55211000	0
Q92552	Q92552	7	7	7	28S ribosomal protein S27, mitochondrial	MRPS27	1	22.2	22.2	22.2	47.611	414	414	0	56.702	By MS/MS	By MS/MS	By MS/MS				39063000	24273000	11866000	0	0	0
Q92572	Q92572	1	1	1	AP-3 complex subunit sigma-1	AP3S1	1	5.7	5.7	5.7	21.732	193	193	0.0084459	7.2382		By matching	By matching	By matching	By MS/MS	By matching	0	2535600	521720	4848600	0	3625300
Q92598	Q92598	37	37	35	Heat shock protein 105 kDa	HSPH1	1	48.3	48.3	45.7	96.864	858	858	0	323.31	By MS/MS	By MS/MS	By MS/MS	By MS/MS	By MS/MS	By MS/MS	84266000	79840000	49851000	1790000000	3010100000	1529200000
Q92615	Q92615	1	1	1	La-related protein 4B	LARP4B	1	2.2	2.2	2.2	80.551	738	738	0.0084531	7.2471	By matching	By matching					1660800	6585600	0	0	0	0
Q92620	Q92620	15	15	15	Pre-mRNA-splicing factor ATP-dependent RNA helicase PRP16	DHX38	1	16.5	16.5	16.5	140.5	1227	1227	0	138.29	By MS/MS	By MS/MS	By MS/MS	By matching	By matching		90735000	63457000	40862000	8313600	4326300	0
Q92769;Q13547;O15379	Q92769;Q13547	3;2;1	3;2;1	3;2;1	Histone deacetylase 2;Histone deacetylase 1	HDAC2;HDAC1	3	7.8	7.8	7.8	55.364	488	488;482;428	0	18.017		By matching	By matching	By matching	By matching		0	2925900	2198800	2373900	2612700	0
Q92817	Q92817	1	1	1	Envoplakin	EVPL	1	0.8	0.8	0.8	231.6	2033	2033	0.0097166	6.8338							0	0	0	0	0	0
Q92841	Q92841	27	18	18	Probable ATP-dependent RNA helicase DDX17	DDX17	1	39.4	27.6	27.6	80.272	729	729	0	300.8	By MS/MS	By MS/MS	By MS/MS	By matching	By MS/MS	By matching	325730000	329450000	127960000	9939200	34186000	2653500
Q92900	Q92900	23	23	23	Regulator of nonsense transcripts 1	UPF1	1	26.2	26.2	26.2	124.34	1129	1129	0	163.54	By MS/MS	By MS/MS	By MS/MS	By MS/MS	By MS/MS	By matching	257950000	217650000	83089000	69958000	107120000	10841000
Q92974;REV__Q99666;REV__O14715	Q92974	32;1;1	32;1;1	31;0;0	Rho guanine nucleotide exchange factor 2	ARHGEF2	3	35	35	34.3	111.54	986	986;1765;1765	0	323.31	By MS/MS	By MS/MS	By MS/MS	By matching	By MS/MS	By matching	736250000	611230000	181560000	23021000	88303000	7943900
Q92979	Q92979	4	4	4	Ribosomal RNA small subunit methyltransferase NEP1	EMG1	1	22.5	22.5	22.5	26.72	244	244	0	26.421	By matching	By matching	By matching				14872000	14212000	1150900	0	0	0
Q93009	Q93009	5	5	5	Ubiquitin carboxyl-terminal hydrolase 7	USP7	1	6.1	6.1	6.1	128.3	1102	1102	0	32.131	By MS/MS	By MS/MS	By MS/MS	By matching			27852000	14331000	12372000	2448800	0	0
Q969G5	Q969G5	2	2	2	Protein kinase C delta-binding protein	PRKCDBP	1	7.7	7.7	7.7	27.701	261	261	0	12.785	By MS/MS	By matching	By matching				76066000	45345000	22853000	0	0	0
Q969Q0	Q969Q0	9	9	2	60S ribosomal protein L36a-like	RPL36AL	1	35.8	35.8	9.4	12.469	106	106	0	61.115	By MS/MS	By MS/MS	By MS/MS	By matching	By MS/MS	By matching	916090000	656320000	234400000	17521000	120940000	66469000
Q969S3	Q969S3	1	1	1	Zinc finger protein 622	ZNF622	1	3.4	3.4	3.4	54.271	477	477	0.0098522	6.9348	By matching	By matching	By matching				5628500	17362000	1645200	0	0	0
Q96AG4	Q96AG4	7	7	7	Leucine-rich repeat-containing protein 59	LRRC59	1	32.9	32.9	32.9	34.93	307	307	0	92.833	By MS/MS	By MS/MS	By MS/MS		By matching		130170000	150960000	37148000	0	5191900	0
Q96B26	Q96B26	5	5	5	Exosome complex component RRP43	EXOSC8	1	34.4	34.4	34.4	30.039	276	276	0	91.983	By matching	By MS/MS	By MS/MS			By matching	13471000	10529000	4874300	0	0	8961900
Q96CS3	Q96CS3	7	7	7	FAS-associated factor 2	FAF2	1	22.7	22.7	22.7	52.623	445	445	0	52.271				By MS/MS	By MS/MS	By MS/MS	0	0	0	70789000	97255000	23024000
Q96CW1	Q96CW1	5	5	5	AP-2 complex subunit mu	AP2M1	1	12.4	12.4	12.4	49.654	435	435	0	28.285	By MS/MS	By MS/MS	By matching		By matching		46550000	32737000	14291000	0	3060600	0
Q96DA0	Q96DA0	3	3	3	Zymogen granule protein 16 homolog B	ZG16B	1	22.1	22.1	22.1	22.739	208	208	0	110.88		By MS/MS	By matching	By matching			0	25029000	491720	1925700	0	0
Q96DG6	Q96DG6	6	6	6	Carboxymethylenebutenolidase homolog	CMBL	1	24.1	24.1	24.1	28.048	245	245	0	40.382	By MS/MS	By MS/MS	By MS/MS	By MS/MS	By MS/MS	By MS/MS	102420000	53470000	37982000	49190000	47152000	22170000
Q96DI7	Q96DI7	5	5	5	U5 small nuclear ribonucleoprotein 40 kDa protein	SNRNP40	1	27.5	27.5	27.5	39.31	357	357	0	52.502	By matching	By MS/MS	By MS/MS	By matching	By matching		16334000	18089000	10327000	1477000	3533800	0
Q96DV4	Q96DV4	1	1	1	39S ribosomal protein L38, mitochondrial	MRPL38	1	2.9	2.9	2.9	44.596	380	380	0.0083682	7.1154							0	0	0	0	0	0
Q96E93	Q96E93	1	1	1	Killer cell lectin-like receptor subfamily G member 1	KLRG1	1	13.3	13.3	13.3	21.831	195	195	1	-2	By matching						31866000	0	0	0	0	0
Q96EL3	Q96EL3	2	2	2	39S ribosomal protein L53, mitochondrial	MRPL53	1	31.2	31.2	31.2	12.107	112	112	0.0028902	12.009							0	0	0	0	0	0
Q96EP5	Q96EP5	1	1	1	DAZ-associated protein 1	DAZAP1	1	3.9	3.9	3.9	43.383	407	407	0.0087489	8.241							0	0	0	0	0	0
Q96EY4	Q96EY4	3	3	3	Translation machinery-associated protein 16	TMA16	1	12.3	12.3	12.3	23.864	203	203	0	24.831	By MS/MS	By MS/MS	By matching		By matching		26125000	26751000	11383000	0	643160	0
Q96EY7	Q96EY7	4	4	4	Pentatricopeptide repeat domain-containing protein 3, mitochondrial	PTCD3	1	7.1	7.1	7.1	78.549	689	689	0	24	By MS/MS	By matching	By matching	By matching	By matching	By matching	23394000	18539000	12074000	5527200	7860700	4120900
Q96FQ6	Q96FQ6	2	2	2	Protein S100-A16	S100A16	1	22.3	22.3	22.3	11.801	103	103	0.0046642	11.437	By MS/MS						3367600	0	0	0	0	0
Q96FW1	Q96FW1	3	3	3	Ubiquitin thioesterase OTUB1	OTUB1	1	13.7	13.7	13.7	31.284	271	271	0	22.235				By MS/MS	By matching	By matching	0	0	0	21441000	8707400	10610000
Q96GA3	Q96GA3	9	9	9	Protein LTV1 homolog	LTV1	1	20.8	20.8	20.8	54.854	475	475	0	112.94	By MS/MS	By MS/MS	By MS/MS		By matching		130130000	106190000	51174000	0	16137000	0
Q96GQ7	Q96GQ7	6	6	6	Probable ATP-dependent RNA helicase DDX27	DDX27	1	8.3	8.3	8.3	89.834	796	796	0	52.159	By MS/MS	By MS/MS	By MS/MS	By matching			34447000	32319000	17297000	4415000	0	0
Q96HA9	Q96HA9	1	1	1	Peroxisomal membrane protein 11C	PEX11G	1	5	5	5	26.636	241	241	1	-2							0	0	0	0	0	0
Q96HS1	Q96HS1	4	4	4	Serine/threonine-protein phosphatase PGAM5, mitochondrial	PGAM5	1	17.3	17.3	17.3	32.004	289	289	0	23.902	By MS/MS	By MS/MS	By MS/MS		By matching		28920000	36993000	1521100	0	9263700	0
Q96I25	Q96I25	5	5	5	Splicing factor 45	RBM17	1	17.2	17.2	17.2	44.961	401	401	0	29.92	By MS/MS	By MS/MS	By MS/MS		By matching		40185000	35338000	18871000	0	4772400	0
Q96IU4	Q96IU4	3	3	3	Alpha/beta hydrolase domain-containing protein 14B	ABHD14B	1	17.6	17.6	17.6	22.345	210	210	0	17.761				By MS/MS	By MS/MS	By matching	0	0	0	26777000	31984000	7189900
Q96IX5	Q96IX5	1	1	1	Up-regulated during skeletal muscle growth protein 5	USMG5	1	25.9	25.9	25.9	6.4575	58	58	0	21.513				By MS/MS	By MS/MS	By MS/MS	0	0	0	7828300	11109000	6160400
Q96JB2	Q96JB2	1	1	1	Conserved oligomeric Golgi complex subunit 3	COG3	1	1.8	1.8	1.8	94.095	828	828	0.009828	6.9195	By matching		By MS/MS	By matching	By matching		1158000	0	625190	1030100	2232800	0
Q96JN8	Q96JN8	10	10	10	Neuralized-like protein 4	NEURL4	1	9.7	9.7	9.7	166.9	1562	1562	0	112.24				By MS/MS	By MS/MS	By MS/MS	0	0	0	26987000	63697000	33366000
Q96JP5	Q96JP5	3	3	3	E3 ubiquitin-protein ligase ZFP91	ZFP91	1	9.5	9.5	9.5	63.444	570	570	0	21.889	By MS/MS	By matching					14407000	3687800	0	0	0	0
Q96K37	Q96K37	1	1	1	Solute carrier family 35 member E1	SLC35E1	1	5.9	5.9	5.9	44.772	410	410	0	17.676					By MS/MS		0	0	0	0	6469300	0
Q96KP4	Q96KP4	2	2	2	Cytosolic non-specific dipeptidase	CNDP2	1	5.9	5.9	5.9	52.878	475	475	0.0047214	11.656					By matching	By matching	0	0	0	0	5779400	2136900
Q96KR1	Q96KR1	2	2	2	Zinc finger RNA-binding protein	ZFR	1	2.5	2.5	2.5	117.01	1074	1074	0.0064516	11.189	By matching	By matching	By matching		By matching	By matching	13588000	9786500	4099800	0	2686200	1583000
Q96P11;Q63ZY6;Q3KNT7	Q96P11	6;2;1	6;2;1	6;2;1	Probable 28S rRNA (cytosine-C(5))-methyltransferase	NSUN5	3	19.8	19.8	19.8	46.691	429	429;315;163	0	51.205	By MS/MS	By MS/MS	By MS/MS		By matching		28410000	30447000	12244000	0	1091400	0
Q96P63	Q96P63	9	9	9	Serpin B12	SERPINB12	1	25.7	25.7	25.7	46.276	405	405	0	97.799	By MS/MS	By MS/MS	By MS/MS	By MS/MS	By MS/MS	By matching	135340000	63240000	19362000	53238000	80552000	11780000
Q96PK6	Q96PK6	10	10	10	RNA-binding protein 14	RBM14	1	20.5	20.5	20.5	69.491	669	669	0	104.39	By MS/MS	By MS/MS	By MS/MS	By MS/MS	By MS/MS	By matching	150930000	151270000	35879000	64712000	86856000	29784000
Q96PU5;P46934;Q96J02	Q96PU5	18;3;1	18;3;1	18;3;1	E3 ubiquitin-protein ligase NEDD4-like	NEDD4L	3	27.8	27.8	27.8	111.93	975	975;1319;903	0	170.71	By MS/MS	By MS/MS	By MS/MS	By MS/MS	By MS/MS	By matching	349460000	395680000	113180000	47411000	132660000	5114700
Q96QA5	Q96QA5	6	6	6	Gasdermin-A	GSDMA	1	15.3	15.3	15.3	49.364	445	445	0	43.338	By MS/MS	By MS/MS	By matching	By MS/MS	By matching	By matching	20998000	13779000	6154400	20957000	20913000	6810100
Q96QF0	Q96QF0	4	4	4	Rab-3A-interacting protein	RAB3IP	1	12	12	12	53.021	476	476	0	27.886	By matching	By MS/MS	By MS/MS				6590000	6351400	3070800	0	0	0
Q96QR8	Q96QR8	6	6	6	Transcriptional activator protein Pur-beta	PURB	1	26.6	26.6	26.6	33.24	312	312	0	67.575	By MS/MS	By MS/MS	By matching			By matching	64488000	31623000	12134000	0	0	489430
Q96SB4	Q96SB4	8	8	6	SRSF protein kinase 1	SRPK1	1	16.8	16.8	13.6	74.324	655	655	0	51.818	By MS/MS	By MS/MS	By MS/MS				66819000	58668000	17520000	0	0	0
Q96SI9	Q96SI9	6	1	1	Spermatid perinuclear RNA-binding protein	STRBP	1	6.5	1	1	73.652	672	672	1	-2	By matching	By matching	By matching	By matching	By matching		66272000	61428000	25910000	0	12247000	0
Q99459	Q99459	14	14	14	Cell division cycle 5-like protein	CDC5L	1	25.7	25.7	25.7	92.25	802	802	0	102.73	By MS/MS	By MS/MS	By MS/MS	By matching	By matching	By matching	141360000	112880000	44117000	10100000	32000000	9983600
Q99460	Q99460	2	2	2	26S proteasome non-ATPase regulatory subunit 1	PSMD1	1	3.5	3.5	3.5	105.84	953	953	0	16.832	By matching	By matching	By matching	By MS/MS	By MS/MS	By MS/MS	13140000	15159000	947540	20395000	38447000	12868000
Q99496;Q06587	Q99496;Q06587	2;1	2;1	2;1	E3 ubiquitin-protein ligase RING2;E3 ubiquitin-protein ligase RING1	RNF2;RING1	2	7.4	7.4	7.4	37.655	336	336;406	0	12.906		By matching	By MS/MS	By matching	By matching	By matching	0	8313700	0	4927000	7048600	3415200
Q99497	Q99497	6	6	6	Protein deglycase DJ-1	PARK7	1	46	46	46	19.891	189	189	0	39.801	By matching	By matching		By MS/MS	By MS/MS	By MS/MS	2606900	2198600	0	54061000	85644000	35141000
Q99543	Q99543	2	2	2	DnaJ homolog subfamily C member 2;DnaJ homolog subfamily C member 2, N-terminally processed	DNAJC2	1	3.4	3.4	3.4	71.996	621	621	0.0046904	11.533	By matching	By matching					2069500	1668000	0	0	0	0
Q99575	Q99575	10	10	10	Ribonucleases P/MRP protein subunit POP1	POP1	1	13.4	13.4	13.4	114.71	1024	1024	0	62.57	By MS/MS	By MS/MS	By MS/MS				45942000	44244000	19009000	0	0	0
Q99613;B5ME19	Q99613;B5ME19	14;13	14;13	14;13	Eukaryotic translation initiation factor 3 subunit C;Eukaryotic translation initiation factor 3 subunit C-like protein	EIF3C;EIF3CL	2	15.7	15.7	15.7	105.34	913	913;914	0	95.912	By MS/MS	By MS/MS	By MS/MS	By MS/MS	By MS/MS	By matching	130820000	126140000	65908000	26313000	65157000	4749500
Q99615	Q99615	7	7	7	DnaJ homolog subfamily C member 7	DNAJC7	1	16.4	16.4	16.4	56.44	494	494	0	64.056	By MS/MS	By MS/MS	By MS/MS	By MS/MS	By MS/MS	By matching	21128000	26212000	14073000	50078000	63880000	23742000
Q99623	Q99623	2	2	2	Prohibitin-2	PHB2	1	8.4	8.4	8.4	33.296	299	299	0	14.978	By matching			By matching	By MS/MS	By matching	2648500	0	0	23564000	20649000	6602800
Q99714	Q99714	16	16	16	3-hydroxyacyl-CoA dehydrogenase type-2	HSD17B10	1	79.3	79.3	79.3	26.923	261	261	0	323.31	By MS/MS	By MS/MS	By MS/MS	By MS/MS	By MS/MS	By MS/MS	2219200000	2263400000	857790000	314280000	821410000	62645000
Q99729	Q99729	10	10	10	Heterogeneous nuclear ribonucleoprotein A/B	HNRNPAB	1	23.2	23.2	23.2	36.224	332	332	0	124.38	By MS/MS	By MS/MS	By MS/MS	By MS/MS	By MS/MS	By MS/MS	381360000	194520000	153250000	15737000	42128000	4039400
Q99832	Q99832	11	11	11	T-complex protein 1 subunit eta	CCT7	1	26	26	26	59.366	543	543	0	119.21				By MS/MS	By MS/MS	By matching	0	0	0	64012000	62801000	27585000
Q99848	Q99848	5	5	5	Probable rRNA-processing protein EBP2	EBNA1BP2	1	22.5	22.5	22.5	34.852	306	306	0	46.621	By MS/MS	By MS/MS	By MS/MS		By matching		100720000	82078000	29358000	0	6753800	0
Q99873	Q99873	5	5	5	Protein arginine N-methyltransferase 1	PRMT1	1	18.3	18.3	18.3	41.515	361	361	0	31.729	By matching	By MS/MS	By MS/MS	By MS/MS	By MS/MS	By MS/MS	18698000	24631000	10758000	19140000	38277000	15837000
Q99877;Q99880;Q99879;Q93079;Q5QNW6;P58876	Q99877;Q99880;Q99879;Q93079;Q5QNW6;P58876	11;10;10;10;10;10	1;0;0;0;0;0	0;0;0;0;0;0	Histone H2B type 1-N;Histone H2B type 1-L;Histone H2B type 1-M;Histone H2B type 1-H;Histone H2B type 2-F;Histone H2B type 1-D	HIST1H2BN;HIST1H2BL;HIST1H2BM;HIST1H2BH;HIST2H2BF;HIST1H2BD	6	65.9	8.7	0	13.922	126	126;126;126;126;126;126	1	-2	By matching	By matching	By matching	By matching	By matching	By matching	0	0	0	0	0	0
Q99962;Q99961	Q99962;Q99961	1;1	1;1	1;1	Endophilin-A1;Endophilin-A2	SH3GL2;SH3GL1	2	3.4	3.4	3.4	39.962	352	352;368	0.009772	6.8886				By MS/MS	By MS/MS		0	0	0	7757200	0	0
Q99988	Q99988	1	1	1	Growth/differentiation factor 15	GDF15	1	5.2	5.2	5.2	34.14	308	308	0.009106	7.0054		By MS/MS					0	7770100	0	0	0	0
Q9BQ39	Q9BQ39	5	4	4	ATP-dependent RNA helicase DDX50	DDX50	1	10.2	8.1	8.1	82.564	737	737	0	33.363	By MS/MS	By MS/MS	By MS/MS				52339000	23672000	8822300	0	0	0
Q9BQ67	Q9BQ67	6	6	6	Glutamate-rich WD repeat-containing protein 1	GRWD1	1	22.9	22.9	22.9	49.419	446	446	0	68.617	By MS/MS	By MS/MS	By MS/MS	By matching	By MS/MS	By matching	89662000	54791000	19888000	2122600	18941000	8035800
Q9BQ75	Q9BQ75	2	2	2	Protein CMSS1	CMSS1	1	7.5	7.5	7.5	31.884	279	279	0	14.638	By matching	By MS/MS	By matching				20367000	16387000	6286000	0	0	0
Q9BQA1	Q9BQA1	10	10	10	Methylosome protein 50	WDR77	1	41.5	41.5	41.5	36.724	342	342	0	158.16	By MS/MS	By MS/MS	By MS/MS	By MS/MS	By MS/MS	By matching	202290000	213230000	128240000	62606000	150020000	3432200
Q9BQE3	Q9BQE3	29	4	3	Tubulin alpha-1C chain	TUBA1C	1	68.6	16.3	13.4	49.895	449	449	0	61.48	By matching	By MS/MS	By matching	By MS/MS	By MS/MS	By MS/MS	19625000	7189100	3120100	31040000	160950000	45761000
Q9BQE5	Q9BQE5	3	3	3	Apolipoprotein L2	APOL2	1	9.8	9.8	9.8	37.092	337	337	0	18.517				By MS/MS	By MS/MS	By MS/MS	0	0	0	19524000	17220000	11034000
Q9BQG0	Q9BQG0	42	42	42	Myb-binding protein 1A	MYBBP1A	1	37.3	37.3	37.3	148.85	1328	1328	0	323.31	By MS/MS	By MS/MS	By MS/MS	By matching	By MS/MS	By matching	1007900000	661660000	243950000	7073000	91956000	1981200
Q9BRJ6	Q9BRJ6	4	4	4	Uncharacterized protein C7orf50	C7orf50	1	35.6	35.6	35.6	22.083	194	194	0	42.584	By MS/MS	By MS/MS	By MS/MS				33552000	29833000	9699500	0	0	0
Q9BRP8	Q9BRP8	5	5	5	Partner of Y14 and mago	WIBG	1	48	48	48	22.655	204	204	0	48.592	By MS/MS	By MS/MS	By MS/MS		By MS/MS		21770000	27282000	12767000	0	2624500	0
Q9BRT6	Q9BRT6	1	1	1	Protein LLP homolog	LLPH	1	12.4	12.4	12.4	15.225	129	129	0.0087413	8.2368	By MS/MS	By MS/MS	By matching				20943000	10986000	11080000	0	0	0
Q9BRZ2;Q15834	Q9BRZ2	3;1	3;1	3;1	E3 ubiquitin-protein ligase TRIM56	TRIM56	2	4.6	4.6	4.6	81.487	755	755;202	0	17.443	By matching	By MS/MS	By MS/MS			By matching	9467400	12602000	13642000	0	0	1481600
Q9BT67	Q9BT67	1	1	1	NEDD4 family-interacting protein 1	NDFIP1	1	7.7	7.7	7.7	24.899	221	221	0	13.902	By MS/MS	By MS/MS	By MS/MS		By MS/MS		2200500	3060200	969800	0	826200	0
Q9BTD8	Q9BTD8	2	2	2	RNA-binding protein 42	RBM42	1	5.4	5.4	5.4	50.413	480	480	0.0064397	11.154	By MS/MS	By MS/MS	By matching				4245000	3616800	976690	0	0	0
Q9BTV4	Q9BTV4	2	2	2	Transmembrane protein 43	TMEM43	1	4.8	4.8	4.8	44.875	400	400	0.0073126	11.062				By MS/MS	By matching		0	0	0	6170000	3046900	0
Q9BUF5	Q9BUF5	12	2	2	Tubulin beta-6 chain	TUBB6	1	31.8	10.1	10.1	49.857	446	446	0.0046816	11.497	By matching	By matching	By matching	By MS/MS	By MS/MS	By matching	0	0	0	7233600	39889000	0
Q9BUJ2	Q9BUJ2	16	16	16	Heterogeneous nuclear ribonucleoprotein U-like protein 1	HNRNPUL1	1	26.6	26.6	26.6	95.737	856	856	0	146.77	By MS/MS	By MS/MS	By MS/MS	By matching	By MS/MS	By matching	351940000	279200000	73953000	10883000	69940000	8957000
Q9BV40	Q9BV40	1	1	1	Vesicle-associated membrane protein 8	VAMP8	1	14	14	14	11.438	100	100	0.008726	8.1926							0	0	0	0	0	0
Q9BV73	Q9BV73	73	73	73	Centrosome-associated protein CEP250	CEP250	1	39.2	39.2	39.2	281.13	2442	2442	0	323.31	By MS/MS	By MS/MS	By MS/MS	By matching	By matching	By matching	529860000	491760000	252780000	21561000	46345000	35884000
Q9BVI4	Q9BVI4	8	8	8	Nucleolar complex protein 4 homolog	NOC4L	1	23.8	23.8	23.8	58.467	516	516	0	115.15	By MS/MS	By MS/MS	By MS/MS		By matching		98527000	55188000	21629000	0	2970000	0
Q9BVJ6;Q5TAP6	Q9BVJ6	5;1	5;1	5;1	U3 small nucleolar RNA-associated protein 14 homolog A	UTP14A	2	8.8	8.8	8.8	87.977	771	771;766	0	45.857	By MS/MS	By MS/MS	By MS/MS		By matching		42343000	21871000	9281900	0	3825400	0
Q9BVP2	Q9BVP2	15	15	15	Guanine nucleotide-binding protein-like 3	GNL3	1	31.3	31.3	31.3	61.992	549	549	0	323.31	By MS/MS	By MS/MS	By MS/MS	By matching	By matching	By matching	280630000	218260000	86074000	6966800	40069000	2243300
Q9BVS4	Q9BVS4	2	2	2	Serine/threonine-protein kinase RIO2	RIOK2	1	5.3	5.3	5.3	63.282	552	552	0.0064815	11.25		By matching	By matching				0	1486400	798060	0	0	0
Q9BW19	Q9BW19	1	1	1	Kinesin-like protein KIFC1	KIFC1	1	1.9	1.9	1.9	73.747	673	673	0.0085763	7.5393							0	0	0	0	0	0
Q9BWF3;Q9BQ04	Q9BWF3;Q9BQ04	5;3	5;3	5;3	RNA-binding protein 4;RNA-binding protein 4B	RBM4;RBM4B	2	20.3	20.3	20.3	40.313	364	364;359	0	54.338	By MS/MS	By MS/MS	By MS/MS		By matching		21925000	32417000	13356000	0	2337400	0
Q9BWJ5	Q9BWJ5	4	4	4	Splicing factor 3B subunit 5	SF3B5	1	46.5	46.5	46.5	10.135	86	86	0	31.095	By MS/MS	By MS/MS	By MS/MS				71336000	46231000	32346000	0	0	0
Q9BWM7	Q9BWM7	5	5	5	Sideroflexin-3	SFXN3	1	23.1	23.1	23.1	35.503	321	321	0	31.578				By MS/MS	By MS/MS	By MS/MS	0	0	0	57068000	69772000	23183000
Q9BWU0	Q9BWU0	1	1	1	Kanadaptin	SLC4A1AP	1	2.6	2.6	2.6	88.813	796	796	0.00982	6.9132		By MS/MS					0	0	0	0	0	0
Q9BXP5	Q9BXP5	5	5	5	Serrate RNA effector molecule homolog	SRRT	1	6.5	6.5	6.5	100.67	876	876	0	28.824	By MS/MS	By matching	By matching	By matching	By matching	By matching	11633000	19515000	7463500	16871000	32306000	8343700
Q9BY77	Q9BY77	5	5	5	Polymerase delta-interacting protein 3	POLDIP3	1	15.9	15.9	15.9	46.089	421	421	0	37.185	By MS/MS	By MS/MS	By MS/MS				31135000	20357000	8740700	0	0	0
Q9BYD3	Q9BYD3	2	2	2	39S ribosomal protein L4, mitochondrial	MRPL4	1	9.6	9.6	9.6	34.919	311	311	0	12.8	By matching	By matching	By matching				5339400	5891700	1996800	0	0	0
Q9BYD6	Q9BYD6	2	2	2	39S ribosomal protein L1, mitochondrial	MRPL1	1	6.8	6.8	6.8	36.908	325	325	0.0064755	11.21							0	0	0	0	0	0
Q9BYG3	Q9BYG3	6	6	6	MKI67 FHA domain-interacting nucleolar phosphoprotein	NIFK	1	30.4	30.4	30.4	34.222	293	293	0	118.28	By MS/MS	By MS/MS	By MS/MS		By matching		87955000	38880000	8289200	0	6811200	0
Q9BYK8	Q9BYK8	20	20	20	Helicase with zinc finger domain 2	HELZ2	1	10.5	10.5	10.5	294.65	2649	2649	0	145.89	By MS/MS	By MS/MS	By MS/MS		By matching		103330000	91699000	76013000	0	4730800	0
Q9BYN8	Q9BYN8	3	3	3	28S ribosomal protein S26, mitochondrial	MRPS26	1	14.6	14.6	14.6	24.211	205	205	0	17.019	By matching	By MS/MS	By MS/MS	By matching	By matching		18439000	8822200	7939900	1241600	3262300	0
Q9BZE4	Q9BZE4	14	14	14	Nucleolar GTP-binding protein 1	GTPBP4	1	26.8	26.8	26.8	73.964	634	634	0	110.6	By MS/MS	By MS/MS	By MS/MS	By matching	By matching	By matching	172780000	146370000	58648000	3478800	21238000	1902400
Q9C075	Q9C075	5	3	3	Keratin, type I cytoskeletal 23	KRT23	1	16.8	13	13	48.131	422	422	0	21.838	By matching	By matching		By matching	By matching	By matching	0	13271000	0	0	0	0
Q9C0J8	Q9C0J8	3	3	3	pre-mRNA 3 end processing protein WDR33	WDR33	1	2.6	2.6	2.6	145.89	1336	1336	0	16.567		By matching					0	4263500	0	0	0	0
Q9GZM8;Q9NXR1	Q9GZM8;Q9NXR1	1;1	1;1	1;1	Nuclear distribution protein nudE-like 1;Nuclear distribution protein nudE homolog 1	NDEL1;NDE1	2	3.5	3.5	3.5	38.374	345	345;346	0	45.138	By MS/MS		By matching				2203100	0	333190	0	0	0
Q9GZR7	Q9GZR7	4	4	4	ATP-dependent RNA helicase DDX24	DDX24	1	9.1	9.1	9.1	96.331	859	859	0	27.939	By MS/MS	By matching	By matching				12172000	9331600	2770700	0	0	0
Q9H0A0	Q9H0A0	10	10	10	N-acetyltransferase 10	NAT10	1	13.5	13.5	13.5	115.73	1025	1025	0	96.108	By MS/MS	By MS/MS	By MS/MS		By matching		76115000	42880000	9113400	0	4496500	0
Q9H0D6	Q9H0D6	8	8	8	5-3 exoribonuclease 2	XRN2	1	9.9	9.9	9.9	108.58	950	950	0	50.945	By matching	By MS/MS	By MS/MS	By matching	By matching		40559000	38197000	16088000	13124000	12673000	0
Q9H0E2	Q9H0E2	1	1	1	Toll-interacting protein	TOLLIP	1	4.7	4.7	4.7	30.281	274	274	0.0087873	8.6305	By matching						2768500	0	0	0	0	0
Q9H0S4	Q9H0S4	10	10	10	Probable ATP-dependent RNA helicase DDX47	DDX47	1	32.1	32.1	32.1	50.646	455	455	0	106	By MS/MS	By MS/MS	By MS/MS	By matching	By matching	By matching	137370000	190350000	37808000	50267000	12951000	1019000
Q9H0U4;Q92928;P51153;Q92930;P61006;P59190	Q9H0U4;Q92928	3;2;1;1;1;1	3;2;1;1;1;1	1;0;0;0;0;0	Ras-related protein Rab-1B;Putative Ras-related protein Rab-1C	RAB1B;RAB1C	6	18.4	18.4	5	22.171	201	201;201;203;207;207;212	0	34.294	By matching	By matching	By matching	By MS/MS	By MS/MS	By MS/MS	4796100	8342600	4036100	30027000	50518000	16967000
Q9H1E1	Q9H1E1	1	1	1	Ribonuclease 7	RNASE7	1	9	9	9	17.419	156	156	0.0085616	7.4989		By matching		By matching	By matching	By matching	0	3166900	0	4938900	8968700	1243300
Q9H299	Q9H299	2	2	2	SH3 domain-binding glutamic acid-rich-like protein 3	SH3BGRL3	1	32.3	32.3	32.3	10.438	93	93	0	36.979				By matching			0	0	0	29966000	0	0
Q9H2G4	Q9H2G4	1	1	1	Testis-specific Y-encoded-like protein 2	TSPYL2	1	1	1	1	79.434	693	693	0.0085324	7.469							0	0	0	0	0	0
Q9H2U1	Q9H2U1	18	18	17	ATP-dependent RNA helicase DHX36	DHX36	1	24.4	24.4	23.5	114.76	1008	1008	0	177.47	By MS/MS	By MS/MS	By MS/MS		By matching	By matching	130540000	125790000	64761000	0	23130000	1272700
Q9H3K6	Q9H3K6	3	3	3	BolA-like protein 2	BOLA2	1	43	43	43	10.116	86	86	0	18.844	By matching	By matching	By matching	By MS/MS	By MS/MS	By matching	14382000	1344700	6892400	19366000	56553000	11687000
Q9H4P4	Q9H4P4	1	1	1	E3 ubiquitin-protein ligase NRDP1	RNF41	1	6.9	6.9	6.9	35.905	317	317	0	60.145				By matching	By MS/MS	By matching	0	0	0	2987800	22002000	3569100
Q9H501	Q9H501	4	4	4	ESF1 homolog	ESF1	1	5.5	5.5	5.5	98.795	851	851	0	25.581	By MS/MS	By MS/MS	By matching				18920000	20979000	4036300	0	0	0
Q9H6F5	Q9H6F5	3	3	3	Coiled-coil domain-containing protein 86	CCDC86	1	11.4	11.4	11.4	40.235	360	360	0	16.932	By MS/MS	By MS/MS	By MS/MS				15994000	11801000	5385500	0	0	0
Q9H6R4	Q9H6R4	4	4	4	Nucleolar protein 6	NOL6	1	5.1	5.1	5.1	127.59	1146	1146	0	32.068	By MS/MS	By matching	By matching	By matching	By matching		19354000	20678000	4708400	4357700	2904700	0
Q9H7E9	Q9H7E9	2	2	2	UPF0488 protein C8orf33	C8orf33	1	17	17	17	24.992	229	229	0	35.066	By MS/MS	By MS/MS	By MS/MS		By matching		33844000	26422000	12774000	0	1925500	0
Q9H8H2	Q9H8H2	2	2	2	Probable ATP-dependent RNA helicase DDX31	DDX31	1	3.5	3.5	3.5	94.086	851	851	0	14.078	By MS/MS	By MS/MS	By MS/MS				22318000	11524000	7478300	0	0	0
Q9H936;Q9H1K4	Q9H936	7;3	7;3	7;3	Mitochondrial glutamate carrier 1	SLC25A22	2	26	26	26	34.47	323	323;315	0	108.45			By matching	By MS/MS	By MS/MS	By MS/MS	0	0	956820	48200000	48004000	15778000
Q9H974	Q9H974	4	4	4	Queuine tRNA-ribosyltransferase subunit QTRTD1	QTRTD1	1	14.9	14.9	14.9	46.712	415	415	0	47.247				By MS/MS	By MS/MS	By MS/MS	0	0	0	127010000	103510000	59329000
Q9UL18;Q9UKV8;Q9H9G7;Q9HCK5	Q9UL18;Q9UKV8;Q9H9G7;Q9HCK5	2;2;2;2	2;2;2;2	2;2;2;2	Protein argonaute-1;Protein argonaute-2;Protein argonaute-3;Protein argonaute-4	AGO1;AGO2;AGO3;AGO4	4	2.8	2.8	2.8	97.213	857	857;859;860;861	0	12.365	By matching	By MS/MS	By MS/MS				13318000	6885800	4220700	0	0	0
Q9H9J2	Q9H9J2	3	3	3	39S ribosomal protein L44, mitochondrial	MRPL44	1	13	13	13	37.535	332	332	0	24.667	By MS/MS						5431800	0	0	0	0	0
Q9HC16	Q9HC16	7	7	6	DNA dC->dU-editing enzyme APOBEC-3G	APOBEC3G	1	20.3	20.3	16.4	46.407	384	384	0	45.608	By MS/MS	By MS/MS	By MS/MS		By matching		88671000	41541000	28017000	0	3773400	0
Q9HC36	Q9HC36	4	4	4	rRNA methyltransferase 3, mitochondrial	RNMTL1	1	12.1	12.1	12.1	47.019	420	420	0	26.043	By MS/MS	By MS/MS					10927000	13809000	0	0	0	0
Q9HCE1	Q9HCE1	10	10	10	Putative helicase MOV-10	MOV10	1	15	15	15	113.67	1003	1003	0	121.29	By MS/MS	By MS/MS	By MS/MS	By MS/MS	By MS/MS	By MS/MS	89625000	88800000	40411000	5752700000	33703000000	10398000000
Q9HCY8	Q9HCY8	2	2	2	Protein S100-A14	S100A14	1	25	25	25	11.662	104	104	0	41.56	By MS/MS	By matching	By MS/MS				21843000	3320300	2358300	0	0	0
Q9HD33	Q9HD33	3	3	3	39S ribosomal protein L47, mitochondrial	MRPL47	1	12.4	12.4	12.4	29.45	250	250	0	15.967	By matching	By matching	By matching				4578500	7175900	5159900	0	0	0
Q9NNW5	Q9NNW5	4	4	4	WD repeat-containing protein 6	WDR6	1	8.7	8.7	8.7	121.72	1121	1121	0	38.515		By matching					0	4870800	0	0	0	0
Q9NP72	Q9NP72	1	1	1	Ras-related protein Rab-18	RAB18	1	7.3	7.3	7.3	22.977	206	206	0.0086059	7.5555					By MS/MS	By MS/MS	0	0	0	0	0	4821200
Q9NP81	Q9NP81	3	3	3	Serine--tRNA ligase, mitochondrial	SARS2	1	8.9	8.9	8.9	58.282	518	518	0	23.968	By MS/MS	By MS/MS	By matching				8398600	10195000	3187100	0	0	0
Q9NPD3	Q9NPD3	8	8	8	Exosome complex component RRP41	EXOSC4	1	36.7	36.7	36.7	26.383	245	245	0	57.563	By MS/MS	By MS/MS	By MS/MS	By matching	By MS/MS	By matching	118070000	65174000	21704000	3749400	14045000	1356000
Q9NQ29	Q9NQ29	2	2	2	Putative RNA-binding protein Luc7-like 1	LUC7L	1	6.5	6.5	6.5	43.727	371	371	0	12.959	By MS/MS	By MS/MS	By matching				3589200	9262700	1701500	0	0	0
Q9NQ55	Q9NQ55	4	4	4	Suppressor of SWI4 1 homolog	PPAN	1	11	11	11	53.193	473	473	0	25.312	By MS/MS	By matching	By matching				10403000	22422000	9585400	0	0	0
Q9NQT4	Q9NQT4	5	5	5	Exosome complex component RRP46	EXOSC5	1	40.9	40.9	40.9	25.249	235	235	0	103.3	By MS/MS	By MS/MS	By MS/MS				51142000	38978000	14981000	0	0	0
Q9NQT5	Q9NQT5	5	5	5	Exosome complex component RRP40	EXOSC3	1	21.8	21.8	21.8	29.572	275	275	0	46.97	By MS/MS	By MS/MS	By MS/MS			By matching	70559000	50496000	22005000	0	0	3859200
Q9NQZ2	Q9NQZ2	2	2	2	Something about silencing protein 10	UTP3	1	4.8	4.8	4.8	54.557	479	479	0	12.6	By MS/MS	By matching	By MS/MS				10425000	13532000	4862500	0	0	0
Q9NR30	Q9NR30	32	32	31	Nucleolar RNA helicase 2	DDX21	1	46.7	46.7	44.8	87.343	783	783	0	323.31	By MS/MS	By MS/MS	By MS/MS	By matching	By MS/MS	By matching	1052700000	622020000	295820000	8692200	136720000	4470600
Q9NR56;Q5VZF2	Q9NR56;Q5VZF2	2;1	2;1	2;1	Muscleblind-like protein 1;Muscleblind-like protein 2	MBNL1;MBNL2	2	5.7	5.7	5.7	41.817	388	388;373	0	13.477	By MS/MS	By MS/MS	By MS/MS		By matching		32898000	32551000	8768700	0	4160400	0
Q9NRN7	Q9NRN7	2	2	2	L-aminoadipate-semialdehyde dehydrogenase-phosphopantetheinyl transferase	AASDHPPT	1	5.5	5.5	5.5	35.776	309	309	0.0046729	11.442				By MS/MS	By matching	By matching	0	0	0	18720000	13010000	9525300
Q9NRP0	Q9NRP0	1	1	1	Oligosaccharyltransferase complex subunit OSTC	OSTC	1	8.1	8.1	8.1	16.829	149	149	0.0098847	6.9594					By MS/MS		0	0	0	0	20087000	0
Q9NRW3	Q9NRW3	3	2	2	DNA dC->dU-editing enzyme APOBEC-3C	APOBEC3C	1	20	13.7	13.7	22.826	190	190	0	12.194	By matching	By MS/MS	By matching		By matching		0	4234500	0	0	0	0
Q9NRX1	Q9NRX1	3	3	3	RNA-binding protein PNO1	PNO1	1	13.9	13.9	13.9	27.924	252	252	0	19.194	By MS/MS	By MS/MS	By matching				19935000	14465000	4242300	0	0	0
Q9NS25;Q9NS26	Q9NS25;Q9NS26	6;3	6;3	5;2	Sperm protein associated with the nucleus on the X chromosome B/F;Sperm protein associated with the nucleus on the X chromosome A	SPANXB1;SPANXA1	2	75.7	75.7	65	11.84	103	103;97	0	57.557				By MS/MS	By MS/MS	By MS/MS	0	0	0	93645000	90602000	49196000
Q9NS69	Q9NS69	4	4	4	Mitochondrial import receptor subunit TOM22 homolog	TOMM22	1	48.6	48.6	48.6	15.521	142	142	0	110.09				By MS/MS	By MS/MS	By MS/MS	0	0	0	74819000	73886000	44319000
Q9NSB2	Q9NSB2	24	17	17	Keratin, type II cuticular Hb4	KRT84	1	41.7	36.2	36.2	64.842	600	600	0	127.8	By matching	By matching	By matching	By matching	By MS/MS	By matching	22951000	17537000	19611000	0	55408000	0
Q9NUD5	Q9NUD5	5	5	5	Zinc finger CCHC domain-containing protein 3	ZCCHC3	1	14.4	14.4	14.4	43.618	404	404	0	30.102	By matching	By MS/MS	By matching				18583000	11982000	3885700	0	0	0
Q9NUL3	Q9NUL3	4	2	2	Double-stranded RNA-binding protein Staufen homolog 2	STAU2	1	7.5	4.9	4.9	62.64	570	570	0.008167	10.819	By matching	By MS/MS	By matching				0	2825200	0	0	0	0
Q9NUL7	Q9NUL7	2	2	2	Probable ATP-dependent RNA helicase DDX28	DDX28	1	4.6	4.6	4.6	59.58	540	540	0.0072661	10.838		By matching	By matching				0	1891800	727580	0	0	0
Q9NUQ6	Q9NUQ6	17	17	17	SPATS2-like protein	SPATS2L	1	42.3	42.3	42.3	61.728	558	558	0	120.24	By MS/MS	By MS/MS	By MS/MS	By matching	By matching	By matching	262490000	199860000	80388000	4409500	27365000	2058100
Q9NUU7;Q9UMR2	Q9NUU7;Q9UMR2	1;1	1;1	1;1	ATP-dependent RNA helicase DDX19A;ATP-dependent RNA helicase DDX19B	DDX19A;DDX19B	2	3.1	3.1	3.1	53.974	478	478;479	0.0089686	10.149				By MS/MS	By matching		0	0	0	9018700	5058700	0
Q9NV06	Q9NV06	2	2	2	DDB1- and CUL4-associated factor 13	DCAF13	1	5.8	5.8	5.8	51.402	445	445	0	16.539							0	0	0	0	0	0
Q9NV31	Q9NV31	2	2	2	U3 small nucleolar ribonucleoprotein protein IMP3	IMP3	1	15.2	15.2	15.2	21.85	184	184	0	12.343	By MS/MS	By MS/MS	By MS/MS				17459000	7078000	2733000	0	0	0
Q9NVH1	Q9NVH1	2	2	2	DnaJ homolog subfamily C member 11	DNAJC11	1	3.9	3.9	3.9	63.277	559	559	0	13.61				By MS/MS	By MS/MS	By MS/MS	0	0	0	12767000	13950000	2593500
Q9NVI7;Q5T2N8	Q9NVI7;Q5T2N8	6;3	6;3	2;1	ATPase family AAA domain-containing protein 3A;ATPase family AAA domain-containing protein 3C	ATAD3A;ATAD3C	2	10.9	10.9	4.7	71.368	634	634;411	0	36.808	By MS/MS	By MS/MS	By MS/MS	By MS/MS	By MS/MS	By MS/MS	55632000	41356000	16085000	7393400	20701000	2893900
Q9NVN8	Q9NVN8	2	2	2	Guanine nucleotide-binding protein-like 3-like protein	GNL3L	1	3.8	3.8	3.8	65.572	582	582	0.0038059	11.809	By matching	By matching	By matching	By matching			19099000	11872000	5698400	7401400	0	0
Q9NVP1	Q9NVP1	14	14	14	ATP-dependent RNA helicase DDX18	DDX18	1	25.4	25.4	25.4	75.406	670	670	0	99.593	By MS/MS	By MS/MS	By MS/MS	By matching	By matching	By matching	238690000	116880000	60828000	3148200	102540000	1522500
Q9NVP2	Q9NVP2	2	2	2	Histone chaperone ASF1B	ASF1B	1	17.3	17.3	17.3	22.433	202	202	0	12.764							0	0	0	0	0	0
Q9NW08	Q9NW08	3	3	3	DNA-directed RNA polymerase III subunit RPC2	POLR3B	1	2.8	2.8	2.8	127.78	1133	1133	0	16.406	By matching	By MS/MS	By matching				6096300	10107000	2423800	0	0	0
Q9NW13	Q9NW13	9	9	9	RNA-binding protein 28	RBM28	1	14.1	14.1	14.1	85.737	759	759	0	68.907	By MS/MS	By MS/MS	By matching				30318000	36224000	13861000	0	0	0
Q9NWH9	Q9NWH9	1	1	1	SAFB-like transcription modulator	SLTM	1	1.8	1.8	1.8	117.15	1034	1034	0.0091514	7.0643		By matching					0	18667000	0	0	0	0
Q9NWT1	Q9NWT1	4	4	4	p21-activated protein kinase-interacting protein 1	PAK1IP1	1	12	12	12	43.963	392	392	0	24.815	By MS/MS	By MS/MS	By matching		By matching		40164000	16313000	2188600	0	921380	0
Q9NWV8	Q9NWV8	1	1	1	BRISC and BRCA1-A complex member 1	BABAM1	1	7	7	7	36.56	329	329	0	24.443				By MS/MS	By MS/MS		0	0	0	0	0	0
Q9NX20	Q9NX20	2	2	2	39S ribosomal protein L16, mitochondrial	MRPL16	1	13.5	13.5	13.5	28.449	251	251	0	15.628		By matching	By matching				0	4202500	2881000	0	0	0
Q9NX58	Q9NX58	14	14	14	Cell growth-regulating nucleolar protein	LYAR	1	37.2	37.2	37.2	43.614	379	379	0	177.3	By MS/MS	By MS/MS	By MS/MS	By matching	By MS/MS	By matching	444840000	253030000	103080000	6422300	48404000	5823100
Q9NX63	Q9NX63	1	1	1	MICOS complex subunit MIC19	CHCHD3	1	6.6	6.6	6.6	26.152	227	227	0.0083893	7.137				By MS/MS	By MS/MS		0	0	0	3190800	4155600	0
Q9NXF1	Q9NXF1	1	1	1	Testis-expressed sequence 10 protein	TEX10	1	1.4	1.4	1.4	105.67	929	929	0.0090171	10.602	By matching		By matching		By matching		1677600	0	315850	0	1990600	0
Q9NY12	Q9NY12	6	5	5	H/ACA ribonucleoprotein complex subunit 1	GAR1	1	24	24	24	22.348	217	217	0	34.172	By MS/MS	By MS/MS	By MS/MS		By MS/MS		62527000	30165000	18306000	0	11342000	0
Q9NY93	Q9NY93	7	7	7	Probable ATP-dependent RNA helicase DDX56	DDX56	1	16.5	16.5	16.5	61.589	547	547	0	54.559	By MS/MS	By MS/MS	By MS/MS	By matching	By MS/MS		78547000	56985000	23729000	1649500	10137000	0
Q9NYF8	Q9NYF8	11	11	11	Bcl-2-associated transcription factor 1	BCLAF1	1	14.3	14.3	14.3	106.12	920	920	0	123.46	By MS/MS	By MS/MS	By MS/MS				140610000	159040000	48462000	0	0	0
Q9NYL9	Q9NYL9	1	1	1	Tropomodulin-3	TMOD3	1	5.7	5.7	5.7	39.594	352	352	0.0087719	8.408							0	0	0	0	0	0
Q9NZB2	Q9NZB2	16	16	16	Constitutive coactivator of PPAR-gamma-like protein 1	FAM120A	1	20.9	20.9	20.9	121.89	1118	1118	0	129.71	By MS/MS	By MS/MS	By MS/MS	By matching	By matching		134000000	132920000	49254000	1328700	1216200	0
Q9NZI8	Q9NZI8	15	13	13	Insulin-like growth factor 2 mRNA-binding protein 1	IGF2BP1	1	30	26	26	63.48	577	577	0	199.27	By MS/MS	By MS/MS	By MS/MS	By MS/MS	By MS/MS	By matching	422470000	383880000	135530000	15667000	68956000	4354700
Q9NZL4	Q9NZL4	2	2	2	Hsp70-binding protein 1	HSPBP1	1	7.2	7.2	7.2	39.474	362	362	0.007286	10.887				By MS/MS	By matching		0	0	0	6534900	11721000	0
Q9NZM5	Q9NZM5	2	2	2	Glioma tumor suppressor candidate region gene 2 protein	GLTSCR2	1	5.9	5.9	5.9	54.389	478	478	0	21.223	By MS/MS	By matching	By MS/MS				9425200	4299900	3413400	0	0	0
Q9NZT1	Q9NZT1	15	15	15	Calmodulin-like protein 5	CALML5	1	91.8	91.8	91.8	15.892	146	146	0	323.31	By MS/MS	By MS/MS	By MS/MS	By MS/MS	By MS/MS	By MS/MS	157860000	494850000	88675000	182700000	241490000	59938000
Q9P015	Q9P015	3	3	3	39S ribosomal protein L15, mitochondrial	MRPL15	1	13.2	13.2	13.2	33.419	296	296	0	17.719	By MS/MS	By MS/MS	By matching				18249000	9293700	3367800	0	0	0
Q9P031	Q9P031	1	1	1	Thyroid transcription factor 1-associated protein 26	CCDC59	1	4.6	4.6	4.6	28.669	241	241	0.0087032	8.0467	By MS/MS	By MS/MS					8156000	9553000	0	0	0	0
Q9P0J0	Q9P0J0	2	2	2	NADH dehydrogenase [ubiquinone] 1 alpha subcomplex subunit 13	NDUFA13	1	16.7	16.7	16.7	16.698	144	144	0	12.788				By MS/MS	By MS/MS		0	0	0	3123200	13383000	0
Q9P225	Q9P225	1	1	1	Dynein heavy chain 2, axonemal	DNAH2	1	0.2	0.2	0.2	507.69	4427	4427	0.0083472	7.0965				By MS/MS	By MS/MS	By MS/MS	0	0	0	776890000	765580000	395550000
Q9P258	Q9P258	13	13	13	Protein RCC2	RCC2	1	29.9	29.9	29.9	56.084	522	522	0	96.832	By MS/MS	By MS/MS	By MS/MS	By matching	By MS/MS	By matching	177720000	142910000	54285000	24702000	58972000	1452100
Q9P287	Q9P287	2	2	2	BRCA2 and CDKN1A-interacting protein	BCCIP	1	9.9	9.9	9.9	35.979	314	314	0.0081596	10.776	By matching	By matching	By matching	By matching		By matching	4044100	5173000	1308100	3729800	0	2654100
Q9P2E9;Q8N4C6	Q9P2E9	35;1	35;1	35;1	Ribosome-binding protein 1	RRBP1	2	29.6	29.6	29.6	152.47	1410	1410;2090	0	323.31	By MS/MS	By MS/MS	By MS/MS	By matching	By MS/MS	By matching	497700000	311120000	243900000	69559000	107160000	42494000
Q9P2I0	Q9P2I0	1	1	1	Cleavage and polyadenylation specificity factor subunit 2	CPSF2	1	1.7	1.7	1.7	88.486	782	782	0.0090909	6.9913	By matching						5379600	0	0	0	0	0
Q9UBG3	Q9UBG3	2	2	2	Cornulin	CRNN	1	12.1	12.1	12.1	53.533	495	495	0	25.867	By MS/MS		By matching				24877000	0	1464900	0	0	0
Q9UBQ5	Q9UBQ5	2	2	2	Eukaryotic translation initiation factor 3 subunit K	EIF3K	1	11.5	11.5	11.5	25.059	218	218	0	12.302	By MS/MS	By matching	By matching				16571000	12132000	8631600	0	0	0
Q9UBS4	Q9UBS4	4	4	4	DnaJ homolog subfamily B member 11	DNAJB11	1	13.7	13.7	13.7	40.513	358	358	0	36.757				By MS/MS	By MS/MS	By MS/MS	0	0	0	5361200	24131000	16517000
Q9UBU9	Q9UBU9	9	9	9	Nuclear RNA export factor 1	NXF1	1	19.4	19.4	19.4	70.182	619	619	0	66.604	By MS/MS	By MS/MS	By MS/MS		By matching		61856000	66770000	16789000	0	17592000	0
Q9UDW1	Q9UDW1	2	2	2	Cytochrome b-c1 complex subunit 9	UQCR10	1	38.1	38.1	38.1	7.3084	63	63	0	14.658				By MS/MS	By MS/MS	By matching	0	0	0	12729000	15208000	6114200
Q9UDY2	Q9UDY2	2	2	2	Tight junction protein ZO-2	TJP2	1	2.1	2.1	2.1	133.96	1190	1190	0	12.364		By MS/MS	By matching				0	7935100	1814000	0	0	0
Q9UG63	Q9UG63	2	2	2	ATP-binding cassette sub-family F member 2	ABCF2	1	4.7	4.7	4.7	71.289	623	623	0.0047393	11.732	By matching	By MS/MS	By matching	By matching	By matching	By matching	7340100	8207500	2389500	4791000	19597000	5863700
Q9UGN5	Q9UGN5	1	1	1	Poly [ADP-ribose] polymerase 2	PARP2	1	2.2	2.2	2.2	66.205	583	583	0.0090834	6.9735							0	0	0	0	0	0
Q9UHB9	Q9UHB9	9	9	9	Signal recognition particle subunit SRP68	SRP68	1	15.9	15.9	15.9	70.729	627	627	0	82.444	By MS/MS	By MS/MS	By MS/MS	By matching	By matching		45166000	31444000	20797000	2064500	3076800	0
Q9UHD8	Q9UHD8	4	4	4	Septin-9	2018-09-09	1	6.5	6.5	6.5	65.401	586	586	0	24.701				By MS/MS	By matching	By MS/MS	0	0	0	30471000	38367000	22898000
Q9UHV9	Q9UHV9	2	2	2	Prefoldin subunit 2	PFDN2	1	16.9	16.9	16.9	16.648	154	154	0	17.62		By matching		By MS/MS	By MS/MS	By matching	0	3114700	0	17520000	26507000	14419000
Q9UHX1	Q9UHX1	2	2	2	Poly(U)-binding-splicing factor PUF60	PUF60	1	6.8	6.8	6.8	59.875	559	559	0	12.244	By matching	By matching	By MS/MS				5895000	12641000	7702600	0	0	0
Q9UI30	Q9UI30	3	3	3	Multifunctional methyltransferase subunit TRM112-like protein	TRMT112	1	32	32	32	14.199	125	125	0	83.607	By MS/MS	By MS/MS	By matching	By MS/MS	By MS/MS	By matching	18877000	12016000	5997000	8459200	12899000	3615300
Q9UI42	Q9UI42	3	3	3	Carboxypeptidase A4	CPA4	1	8.8	8.8	8.8	47.351	421	421	0	18.541	By matching	By matching	By matching	By matching			7919000	3725600	2671800	4704000	0	0
Q9UJA5	Q9UJA5	4	4	4	tRNA (adenine(58)-N(1))-methyltransferase non-catalytic subunit TRM6	TRMT6	1	12.1	12.1	12.1	55.799	497	497	0	26.987	By MS/MS	By MS/MS	By matching				21432000	21961000	3318800	0	0	0
Q9UJS0	Q9UJS0	11	11	7	Calcium-binding mitochondrial carrier protein Aralar2	SLC25A13	1	19.3	19.3	12.9	74.175	675	675	0	67.245	By matching			By MS/MS	By MS/MS	By MS/MS	1960300	0	0	61034000	121820000	44282000
Q9UJZ1	Q9UJZ1	6	6	6	Stomatin-like protein 2, mitochondrial	STOML2	1	25.6	25.6	25.6	38.534	356	356	0	59.989	By matching		By matching	By MS/MS	By MS/MS	By MS/MS	1862900	0	366000	36992000	51868000	13691000
Q9UK99	Q9UK99	1	1	1	F-box only protein 3	FBXO3	1	3.6	3.6	3.6	54.56	471	471	0.0085543	7.4963				By MS/MS			0	0	0	4539000	0	0
Q9UKD2	Q9UKD2	13	13	13	mRNA turnover protein 4 homolog	MRTO4	1	52.3	52.3	52.3	27.56	239	239	0	157.3	By MS/MS	By MS/MS	By MS/MS	By matching	By matching	By matching	278800000	216460000	89765000	31491000	55639000	9891800
Q9UKN8	Q9UKN8	8	8	8	General transcription factor 3C polypeptide 4	GTF3C4	1	17	17	17	91.981	822	822	0	59.784	By MS/MS	By MS/MS	By MS/MS		By matching		34146000	27165000	11366000	0	3905000	0
Q9ULX3	Q9ULX3	2	2	2	RNA-binding protein NOB1	NOB1	1	5.8	5.8	5.8	46.674	412	412	0	13.161	By MS/MS	By MS/MS	By matching		By matching		7201200	6859300	3657200	0	1983500	0
Q9UM00	Q9UM00	2	2	2	Transmembrane and coiled-coil domain-containing protein 1	TMCO1	1	13.8	13.8	13.8	21.175	188	188	0	22.906	By matching	By matching	By matching	By matching	By MS/MS	By matching	7920700	2735400	2019200	25566000	23701000	6583000
Q9UMS4	Q9UMS4	13	13	13	Pre-mRNA-processing factor 19	PRPF19	1	41.3	41.3	41.3	55.18	504	504	0	273.25	By MS/MS	By MS/MS	By MS/MS	By matching	By MS/MS	By MS/MS	506250000	416270000	151540000	15084000	53395000	10731000
Q9UN81	Q9UN81	5	5	5	LINE-1 retrotransposable element ORF1 protein	L1RE1	1	16.9	16.9	16.9	40.055	338	338	0	33.308	By MS/MS	By MS/MS	By MS/MS				23161000	16235000	2572200	0	0	0
Q9UN86	Q9UN86	9	8	8	Ras GTPase-activating protein-binding protein 2	G3BP2	1	26.6	24.1	24.1	54.12	482	482	0	88.374	By MS/MS	By MS/MS	By MS/MS	By matching	By matching	By matching	120190000	112730000	48002000	18919000	57181000	19212000
Q9UNE7	Q9UNE7	7	7	7	E3 ubiquitin-protein ligase CHIP	STUB1	1	22.8	22.8	22.8	34.856	303	303	0	47.022		By matching	By matching	By MS/MS	By MS/MS	By MS/MS	0	1884700	3120700	80735000	55679000	15398000
Q9UNQ2	Q9UNQ2	13	13	13	Probable dimethyladenosine transferase	DIMT1	1	47.6	47.6	47.6	35.236	313	313	0	83.108	By MS/MS	By MS/MS	By MS/MS		By matching		187400000	159800000	54175000	0	12545000	0
Q9UNS2	Q9UNS2	1	1	1	COP9 signalosome complex subunit 3	COPS3	1	2.8	2.8	2.8	47.873	423	423	0.0085985	7.5499	By matching	By MS/MS	By MS/MS	By matching			1789100	664410	682660	1981200	0	0
Q9UNX3	Q9UNX3	10	1	1	60S ribosomal protein L26-like 1	RPL26L1	1	41.4	6.2	6.2	17.256	145	145	0.0084104	7.1941	By MS/MS	By MS/MS	By MS/MS	By matching	By matching	By matching	74842000	74574000	27191000	0	0	0
Q9UPM8	Q9UPM8	6	6	6	AP-4 complex subunit epsilon-1	AP4E1	1	6.9	6.9	6.9	127.29	1137	1137	0	72.438	By MS/MS	By MS/MS	By MS/MS		By matching		19376000	25170000	11582000	0	7495100	0
Q9UPN3	Q9UPN3	12	11	11	Microtubule-actin cross-linking factor 1, isoforms 1/2/3/5	MACF1	1	2.1	2	2	838.3	7388	7388	0	66.49	By MS/MS	By MS/MS	By MS/MS		By matching		4599300	23687000	8344000	0	903200	0
Q9UPT8	Q9UPT8	4	4	4	Zinc finger CCCH domain-containing protein 4	ZC3H4	1	7.6	7.6	7.6	140.26	1303	1303	0	34.261	By MS/MS	By MS/MS	By MS/MS		By MS/MS		20457000	18635000	5075600	0	63032000	0
Q9UQ80	Q9UQ80	6	6	6	Proliferation-associated protein 2G4	PA2G4	1	17.3	17.3	17.3	43.786	394	394	0	33.967	By matching	By MS/MS	By matching				5095100	22393000	3387300	0	0	0
Q9Y221	Q9Y221	3	3	3	60S ribosome subunit biogenesis protein NIP7 homolog	NIP7	1	29.4	29.4	29.4	20.462	180	180	0	21.041	By MS/MS	By MS/MS	By MS/MS				48626000	33691000	8551200	0	0	0
Q9Y223	Q9Y223	1	1	1	Bifunctional UDP-N-acetylglucosamine 2-epimerase/N-acetylmannosamine kinase;UDP-N-acetylglucosamine 2-epimerase (hydrolyzing);N-acetylmannosamine kinase	GNE	1	1.5	1.5	1.5	79.274	722	722	0.0085251	7.4111				By MS/MS	By MS/MS		0	0	0	3430600	5831100	0
Q9Y224	Q9Y224	6	6	6	UPF0568 protein C14orf166	C14orf166	1	34.4	34.4	34.4	28.068	244	244	0	56.605	By MS/MS	By matching	By matching				63193000	30130000	13261000	0	0	0
Q9Y230	Q9Y230	25	25	25	RuvB-like 2	RUVBL2	1	49.9	49.9	49.9	51.156	463	463	0	194.82	By MS/MS	By MS/MS	By MS/MS	By MS/MS	By MS/MS	By MS/MS	33578000	46911000	28667000	542950000	754500000	332360000
Q9Y262	Q9Y262	12	12	12	Eukaryotic translation initiation factor 3 subunit L	EIF3L	1	27.3	27.3	27.3	66.726	564	564	0	210.56	By MS/MS	By MS/MS	By MS/MS	By MS/MS	By matching		46711000	55006000	45733000	12833000	9216800	0
Q9Y265	Q9Y265	18	18	18	RuvB-like 1	RUVBL1	1	49.3	49.3	49.3	50.227	456	456	0	184.31	By MS/MS	By MS/MS	By MS/MS	By MS/MS	By MS/MS	By MS/MS	93202000	84000000	26704000	540220000	982680000	329500000
Q9Y277	Q9Y277	1	1	1	Voltage-dependent anion-selective channel protein 3	VDAC3	1	7.1	7.1	7.1	30.658	283	283	0.0097009	6.8054				By matching	By matching		0	0	0	3178900	5469300	0
Q9Y285	Q9Y285	5	5	5	Phenylalanine--tRNA ligase alpha subunit	FARSA	1	12.4	12.4	12.4	57.563	508	508	0	58.983	By MS/MS	By MS/MS	By MS/MS	By MS/MS	By MS/MS	By MS/MS	4916400	3928500	2835900	42438000	113740000	31326000
Q9Y294	Q9Y294	1	1	1	Histone chaperone ASF1A	ASF1A	1	7.4	7.4	7.4	22.968	204	204	0.0086356	7.6641							0	0	0	0	0	0
Q9Y295	Q9Y295	8	8	8	Developmentally-regulated GTP-binding protein 1	DRG1	1	27.5	27.5	27.5	40.542	367	367	0	76.058	By MS/MS	By MS/MS	By matching	By matching	By matching		28902000	47640000	9275700	7619700	3759100	0
Q9Y2J4	Q9Y2J4	3	3	3	Angiomotin-like protein 2	AMOTL2	1	6.3	6.3	6.3	85.763	779	779	0	17.722	By matching	By MS/MS	By matching				14109000	19616000	7320900	0	0	0
Q9Y2K3	Q9Y2K3	1	1	1	Myosin-15	MYH15	1	0.7	0.7	0.7	224.62	1946	1946	1	-2	By MS/MS	By matching	By MS/MS	By MS/MS	By MS/MS	By MS/MS	445260000	221370000	466060000	339460000	461480000	133530000
Q9Y2P8	Q9Y2P8	8	8	8	RNA 3-terminal phosphate cyclase-like protein	RCL1	1	26.3	26.3	26.3	40.842	373	373	0	85.055	By MS/MS	By MS/MS	By MS/MS	By matching	By matching		146540000	91805000	43374000	1414300	3799200	0
Q9Y2Q9	Q9Y2Q9	2	2	2	28S ribosomal protein S28, mitochondrial	MRPS28	1	10.2	10.2	10.2	20.843	187	187	0.0064875	11.296	By MS/MS	By MS/MS	By matching				15076000	2303600	1195100	0	0	0
Q9Y2R4	Q9Y2R4	3	3	3	Probable ATP-dependent RNA helicase DDX52	DDX52	1	9.2	9.2	9.2	67.497	599	599	0	34.063	By MS/MS	By MS/MS	By matching				35077000	9908700	2174800	0	0	0
Q9Y2R5	Q9Y2R5	3	3	3	28S ribosomal protein S17, mitochondrial	MRPS17	1	37.7	37.7	37.7	14.502	130	130	0	36.67	By MS/MS	By MS/MS	By MS/MS				12703000	14428000	8883200	0	0	0
Q9Y2R9	Q9Y2R9	5	5	5	28S ribosomal protein S7, mitochondrial	MRPS7	1	20.7	20.7	20.7	28.134	242	242	0	29.289	By MS/MS	By matching	By matching				16869000	5345400	3746300	0	0	0
Q9Y2S0	Q9Y2S0	1	1	1	DNA-directed RNA polymerases I and III subunit RPAC2	POLR1D	1	13.5	13.5	13.5	15.237	133	133	0.0086505	7.7058	By matching	By matching					9083400	9729000	0	0	0	0
Q9Y2W1	Q9Y2W1	19	19	19	Thyroid hormone receptor-associated protein 3	THRAP3	1	25	25	25	108.66	955	955	0	148.58	By MS/MS	By MS/MS	By MS/MS			By matching	356610000	282110000	116920000	0	0	5171300
Q9Y2X3	Q9Y2X3	14	14	14	Nucleolar protein 58	NOP58	1	38	38	38	59.578	529	529	0	121.19	By MS/MS	By MS/MS	By MS/MS	By MS/MS	By matching	By matching	275600000	170580000	63129000	12856000	36707000	6996800
Q9Y383	Q9Y383	3	3	3	Putative RNA-binding protein Luc7-like 2	LUC7L2	1	9.9	9.9	9.9	46.513	392	392	0	26.4	By MS/MS	By MS/MS	By MS/MS	By MS/MS	By MS/MS		30270000	16397000	13937000	0	8355100	0
Q9Y3A4;Q9NSQ0	Q9Y3A4;Q9NSQ0	2;1	2;1	2;1	Ribosomal RNA-processing protein 7 homolog A;Putative ribosomal RNA-processing protein 7 homolog B	RRP7A;RRP7BP	2	6.8	6.8	6.8	32.334	280	280;103	0	12.483	By MS/MS	By matching	By matching				10057000	6272100	1437900	0	0	0
Q9Y3B2	Q9Y3B2	3	3	3	Exosome complex component CSL4	EXOSC1	1	22.6	22.6	22.6	21.452	195	195	0	46.576	By MS/MS	By MS/MS	By MS/MS		By MS/MS		29708000	24006000	14865000	0	3216800	0
Q9Y3B4	Q9Y3B4	5	5	5	Splicing factor 3B subunit 6	SF3B6	1	45.6	45.6	45.6	14.585	125	125	0	35.891	By MS/MS	By MS/MS	By MS/MS	By matching	By MS/MS	By matching	50711000	39501000	19220000	4970100	25390000	1125800
Q9Y3B7	Q9Y3B7	8	8	8	39S ribosomal protein L11, mitochondrial	MRPL11	1	42.7	42.7	42.7	20.683	192	192	0	71.653	By MS/MS	By MS/MS	By MS/MS		By matching		44546000	25425000	15903000	0	4617900	0
Q9Y3C1	Q9Y3C1	7	7	7	Nucleolar protein 16	NOP16	1	46.1	46.1	46.1	21.188	178	178	0	59.534	By MS/MS	By MS/MS	By matching		By matching	By matching	102120000	72080000	24831000	0	6872900	1187800
Q9Y3D3	Q9Y3D3	4	4	4	28S ribosomal protein S16, mitochondrial	MRPS16	1	38	38	38	15.345	137	137	0	27.609	By matching	By MS/MS	By matching		By matching		42795000	37144000	19371000	0	3975400	0
Q9Y3D9	Q9Y3D9	3	3	3	28S ribosomal protein S23, mitochondrial	MRPS23	1	15.8	15.8	15.8	21.77	190	190	0	21.374	By MS/MS	By MS/MS	By MS/MS	By matching	By matching	By matching	38354000	26146000	17834000	15424000	22607000	3319900
Q9Y3F4	Q9Y3F4	9	9	9	Serine-threonine kinase receptor-associated protein	STRAP	1	40.9	40.9	40.9	38.438	350	350	0	142.3	By matching	By MS/MS	By MS/MS	By MS/MS		By matching	13255000	13363000	2324000	17133000	0	3734900
Q9Y3I0	Q9Y3I0	10	10	10	tRNA-splicing ligase RtcB homolog	RTCB	1	31.3	31.3	31.3	55.21	505	505	0	65.792	By MS/MS	By MS/MS	By MS/MS	By matching	By matching	By matching	514860000	319200000	41074000	254140000	889340000	98399000
Q9Y3T9	Q9Y3T9	2	2	2	Nucleolar complex protein 2 homolog	NOC2L	1	2.5	2.5	2.5	84.918	749	749	0.0038132	11.823					By matching		0	0	0	0	6623000	0
Q9Y3U8	Q9Y3U8	6	6	6	60S ribosomal protein L36	RPL36	1	33.3	33.3	33.3	12.254	105	105	0	65.666	By MS/MS	By MS/MS	By MS/MS	By matching	By MS/MS	By MS/MS	1250900000	967680000	376660000	48405000	179180000	63372000
Q9Y3Y2	Q9Y3Y2	1	1	1	Chromatin target of PRMT1 protein	CHTOP	1	5.2	5.2	5.2	26.396	248	248	0.0087336	8.2233	By MS/MS	By matching	By matching				8898500	4717200	1447700	0	0	0
Q9Y3Z3	Q9Y3Z3	3	3	3	Deoxynucleoside triphosphate triphosphohydrolase SAMHD1	SAMHD1	1	5.4	5.4	5.4	72.2	626	626	0	19.998				By MS/MS	By MS/MS	By MS/MS	0	0	0	13445000	21131000	11410000
Q9Y490	Q9Y490	6	6	5	Talin-1	TLN1	1	3.4	3.4	3	269.76	2541	2541	0	63.304							0	0	0	0	0	0
Q9Y4B6	Q9Y4B6	5	5	5	Protein VPRBP	VPRBP	1	4.2	4.2	4.2	169.01	1507	1507	0	28.302	By matching	By MS/MS	By MS/MS				18296000	14985000	6689400	0	0	0
Q9Y4E8	Q9Y4E8	7	7	7	Ubiquitin carboxyl-terminal hydrolase 15	USP15	1	8	8	8	112.42	981	981	0	44.252	By MS/MS	By MS/MS	By MS/MS	By matching	By MS/MS	By matching	62630000	43900000	31018000	9313300	14446000	1817200
Q9Y4L1	Q9Y4L1	7	7	7	Hypoxia up-regulated protein 1	HYOU1	1	9	9	9	111.33	999	999	0	52.162			By matching	By MS/MS	By MS/MS	By MS/MS	0	0	336610	53177000	21024000	30624000
Q9Y4P3	Q9Y4P3	3	3	3	Transducin beta-like protein 2	TBL2	1	11	11	11	49.797	447	447	0	22.975	By matching	By matching	By matching	By matching	By matching	By matching	8241800	11365000	7104200	3474300	6854200	4525400
Q9Y4Y9	Q9Y4Y9	1	1	1	U6 snRNA-associated Sm-like protein LSm5	LSM5	1	20.9	20.9	20.9	9.9374	91	91	0.0085837	7.5411	By matching	By matching	By matching				1524200	2316000	733390	0	0	0
Q9Y520	Q9Y520	2	2	2	Protein PRRC2C	PRRC2C	1	1	1	1	316.91	2896	2896	0.0089847	10.478	By matching	By matching	By matching				6588800	8709800	2260000	0	0	0
Q9Y587	Q9Y587	1	1	1	AP-4 complex subunit sigma-1	AP4S1	1	6.9	6.9	6.9	17.005	144	144	0.0087184	8.1874	By MS/MS	By matching	By matching	By matching	By MS/MS		17484000	8595900	3827400	2438300	5022400	0
Q9Y5M8	Q9Y5M8	1	1	1	Signal recognition particle receptor subunit beta	SRPRB	1	7	7	7	29.702	271	271	0	12.245				By matching	By MS/MS		0	0	0	4304500	6003100	0
Q9Y5Q8	Q9Y5Q8	8	8	8	General transcription factor 3C polypeptide 5	GTF3C5	1	19.5	19.5	19.5	59.57	519	519	0	56.851	By MS/MS	By MS/MS	By MS/MS	By matching	By matching		47864000	31663000	10765000	1613600	9070800	0
Q9Y5Q9	Q9Y5Q9	9	9	9	General transcription factor 3C polypeptide 3	GTF3C3	1	12	12	12	101.27	886	886	0	58.264	By MS/MS	By MS/MS	By MS/MS	By matching	By MS/MS		37383000	20674000	40727000	8779900	3571600	0
Q9Y5U2	Q9Y5U2	2	2	2	Protein TSSC4	TSSC4	1	7.9	7.9	7.9	34.325	329	329	0	12.784	By matching	By matching	By MS/MS		By matching		12942000	5616400	11302000	0	3594800	0
Q9Y657;Q5JUX0	Q9Y657;Q5JUX0	2;1	2;1	2;1	Spindlin-1;Spindlin-3	SPIN1;SPIN3	2	10.3	10.3	10.3	29.6	262	262;258	0.0064695	11.209			By MS/MS				0	0	2337400	0	0	0
Q9Y676	Q9Y676	3	3	3	28S ribosomal protein S18b, mitochondrial	MRPS18B	1	19	19	19	29.395	258	258	0	22.96	By MS/MS	By MS/MS	By MS/MS				9735800	25359000	4598300	0	0	0
Q9Y678	Q9Y678	20	20	17	Coatomer subunit gamma-1	COPG1	1	30.4	30.4	25.6	97.717	874	874	0	295.36	By MS/MS	By MS/MS	By MS/MS	By MS/MS	By MS/MS	By MS/MS	197280000	184090000	97865000	158990000	189220000	62463000
Q9Y6B7	Q9Y6B7	1	1	1	AP-4 complex subunit beta-1	AP4B1	1	2.2	2.2	2.2	83.259	739	739	0.0085397	7.4712							0	0	0	0	0	0
Q9Y6C9	Q9Y6C9	1	1	1	Mitochondrial carrier homolog 2	MTCH2	1	4.3	4.3	4.3	33.331	303	303	0.0088574	9.1193				By MS/MS	By MS/MS		0	0	0	4842300	14453000	0
Q9Y6K5	Q9Y6K5	6	6	6	2-5-oligoadenylate synthase 3	OAS3	1	6.2	6.2	6.2	121.17	1087	1087	0	33.59	By matching	By matching	By matching	By MS/MS	By MS/MS		10762000	15028000	5459200	9380500	5223000	0
Q9Y6M1	Q9Y6M1	11	10	10	Insulin-like growth factor 2 mRNA-binding protein 2	IGF2BP2	1	27.5	25.4	25.4	66.121	599	599	0	109.25	By MS/MS	By MS/MS	By MS/MS	By matching	By matching	By matching	99737000	76986000	33978000	3443800	14815000	48053000
Q9Y6V0	Q9Y6V0	1	1	1	Protein piccolo	PCLO	1	0.2	0.2	0.2	553.27	5065	5065	0.0097959	6.9056							0	0	0	0	0	0
Q9Y6V7	Q9Y6V7	5	5	5	Probable ATP-dependent RNA helicase DDX49	DDX49	1	13.5	13.5	13.5	54.226	483	483	0	35.443	By MS/MS	By MS/MS	By MS/MS				15154000	10053000	10318000	0	0	0
